# Supplementary material
Source: ML conference proceedings conference paper supplement (https://proceedings.neurips.cc/paper_files/paper/2020/hash/618491e20a9b686b79e158c293ab4f91-Abstract.html)
Supplement: Supplementary file 1 [file 618491e20a9b686b79e158c293ab4f91-Supplemental.zip]

Archive with 85 entries (71 files):
- codes/
- codes/restricted_imagenet/
- codes/cinic/
- codes/.DS_Store
- __MACOSX/codes/._.DS_Store
- codes/cifar100/
- codes/.gitignore
- codes/cifar10/
- codes/restricted_imagenet/restricted_imagenet_data/
- codes/restricted_imagenet/.DS_Store
- __MACOSX/codes/restricted_imagenet/._.DS_Store
- codes/restricted_imagenet/random_init_main.py
- codes/restricted_imagenet/model/
- codes/restricted_imagenet/adversarial_init_pre_train.py
- codes/restricted_imagenet/preprocessing/
- codes/restricted_imagenet/adversarial_init_main.py
- codes/cinic/cinic_data/
- codes/cinic/.DS_Store
- __MACOSX/codes/cinic/._.DS_Store
- codes/cinic/random_init_main.py
- codes/cinic/model/
- codes/cinic/adversarial_init_pre_train.py
- codes/cinic/adversarial_init_main.py
- codes/cifar100/.DS_Store
- __MACOSX/codes/cifar100/._.DS_Store
- codes/cifar100/cifar100_data/
- codes/cifar100/__init__.py
- codes/cifar100/random_init_main.py
- codes/cifar100/model/
- codes/cifar100/adversarial_init_pre_train.py
- codes/cifar100/adversarial_init_main.py
- codes/cifar10/cifar10_data/
- codes/cifar10/random_init_main.py
- codes/cifar10/model/
- codes/cifar10/adversarial_init_pre_train.py
- codes/cifar10/adversarial_init_main.py
- codes/restricted_imagenet/restricted_imagenet_data/confusion_data_generation.py
- codes/restricted_imagenet/model/vgg.py
- codes/restricted_imagenet/model/resnet_01.py
- codes/restricted_imagenet/model/util.py
- codes/restricted_imagenet/model/densenet.py
- codes/restricted_imagenet/model/__init__.py
- codes/restricted_imagenet/model/verify_util.py
- codes/restricted_imagenet/model/restricted_imagenet_dataset.py
- codes/restricted_imagenet/model/resnet_02.py
- codes/restricted_imagenet/model/resnet_03.py
- codes/restricted_imagenet/preprocessing/02_fetch_subset_train.py
- codes/restricted_imagenet/preprocessing/02_fetch_subset_test.py
- codes/restricted_imagenet/preprocessing/imagenet_class_index.json
- codes/restricted_imagenet/preprocessing/train.txt
- codes/restricted_imagenet/preprocessing/01_check_train_and_val_txt.py
- codes/restricted_imagenet/preprocessing/03_resize.py
- codes/restricted_imagenet/preprocessing/README.md
- codes/restricted_imagenet/preprocessing/val.txt
- codes/restricted_imagenet/preprocessing/imagenet100_clsidx_to_labels.txt
- codes/cinic/cinic_data/confusion_data_generation.py
- codes/cinic/cinic_data/download.sh
- codes/cinic/model/vgg.py
- codes/cinic/model/resnet_01.py
- codes/cinic/model/util.py
- codes/cinic/model/densenet.py
- codes/cinic/model/__init__.py
- codes/cinic/model/verify_util.py
- codes/cinic/model/cinic_dataset.py
- codes/cifar100/cifar100_data/check.py
- codes/cifar100/cifar100_data/confusion_data_generation.py
- codes/cifar100/cifar100_data/data_download.py
- codes/cifar100/model/vgg.py
- codes/cifar100/model/resnet_01.py
- codes/cifar100/model/cifar100_dataset.py
- codes/cifar100/model/util.py
- codes/cifar100/model/densenet.py
- codes/cifar100/model/__init__.py
- codes/cifar100/model/verify_util.py
- codes/cifar100/model/resnet_02.py
- codes/cifar100/model/resnet_03.py
- codes/cifar10/cifar10_data/confusion_data_generation.py
- codes/cifar10/cifar10_data/data_download.py
- codes/cifar10/model/vgg.py
- codes/cifar10/model/util.py
- codes/cifar10/model/densenet.py
- codes/cifar10/model/resnet.py
- codes/cifar10/model/cifar10_dataset.py
- final full paper.pdf
- __MACOSX/._final full paper.pdf
