# Supplementary material
Source: ML conference proceedings conference paper supplement (https://proceedings.neurips.cc/paper_files/paper/2020/hash/618491e20a9b686b79e158c293ab4f91-Abstract.html)
Supplement: Supplementary file 1 [file 618491e20a9b686b79e158c293ab4f91-Supplemental.zip › codes/cifar100/cifar100_data/data_download.py]

from __future__ import print_function
import argparse
import torch
import torch.nn as nn
import torch.nn.functional as F
import torch.optim as optim
from torchvision import datasets, transforms
from torch.autograd import Variable


def download_dataset():
    train_dataset = datasets.CIFAR100('./data', train=True, download=True)
    test_dataset = datasets.CIFAR100('./data', train=False, download=True)


if __name__ == '__main__':
    download_dataset()
