# Supplementary material
Source: ML conference proceedings conference paper supplement (https://proceedings.neurips.cc/paper_files/paper/2020/hash/618491e20a9b686b79e158c293ab4f91-Abstract.html)
Supplement: Supplementary file 1 [file 618491e20a9b686b79e158c293ab4f91-Supplemental.zip › codes/cinic/cinic_data/download.sh]

wget https://datashare.is.ed.ac.uk/bitstream/handle/10283/3192/CINIC-10.tar.gz
