# Supplementary material
Source: ML conference proceedings conference paper supplement (https://proceedings.neurips.cc/paper_files/paper/2020/hash/618491e20a9b686b79e158c293ab4f91-Abstract.html)
Supplement: Supplementary file 1 [file 618491e20a9b686b79e158c293ab4f91-Supplemental.zip › codes/restricted_imagenet/adversarial_init_main.py]

from __future__ import print_function

import argparse
import time as time
import copy
import os

import sys
sys.path.insert(0, 'model')
import resnet_03
import densenet
import vgg
from restricted_imagenet_dataset import get_dataloader
from util import *

import numpy as np
import torch
import torch.nn as nn
import torch.optim as optim
import torch.backends.cudnn as cudnn

parser = argparse.ArgumentParser(description='PyTorch Restricted Imagenet Example')
parser.add_argument('--batch-size', type=int, default=128)
parser.add_argument('--no-cuda', action='store_true', default=False)

parser.add_argument('--epochs', type=int, default=300)
parser.add_argument('--lr', type=float, default=0.1)
parser.add_argument('--schedule', type=int, nargs='+', default=[150, 225])
parser.add_argument('--gamma', type=float, default=0.1)

parser.add_argument('--use-DA', dest='DA_for_train', action='store_true')
parser.add_argument('--no-DA', dest='DA_for_train', action='store_false')
parser.set_defaults(DA_for_train=True)
parser.add_argument('--momentum', type=float, default=0.9)
parser.add_argument('--weight-decay', type=float, default=5e-4)

parser.add_argument('--model', type=str, default='resnet18')
parser.add_argument('--running_idx', type=int, default=1)
parser.add_argument('--mode', type=str, default='adversarial_init_00')
parser.set_defaults(Is_Init=False)
parser.add_argument('--confusion_T', type=int, default=1)
parser.add_argument('--zero_out_ratio', type=float, default=0.1)
parser.add_argument('--pre_model_weight_path', type=str, default='model_weight/{}/model_weight_adversarial_init_00/{}/pre_confusion_{}_zero_out_{}.pt')
parser.add_argument('--model_weight_dir', type=str, default='model_weight/{}/model_weight_{}/{}')
parser.add_argument('--output_dir', type=str, default='output/{}/output_{}/{}')
parser.add_argument('--epoch_weight_path', type=str, default='{}/epoch_{}_confusion_{}_zero_out_{}.pt')
parser.add_argument('--model_weight_path', type=str, default='{}/main_confusion_{}_zero_out_{}.pt')

parser.add_argument('--seed', type=int, default=1)
parser.add_argument('--freq_report', type=int, default=25)


def get_model(args):
    if args.model == 'resnet18':
        model = resnet_03.ResNet18(num_classes=9)
    elif args.model == 'resnet50':
        model = resnet_03.ResNet50(num_classes=9)
    elif args.model == 'densenet40':
        model = densenet.DenseNet3(depth=40, num_classes=9)
    elif args.model == 'vgg16':
        model = vgg.VGG('VGG16', num_classes=9)
    return model


def create_dir(args):
    pre_weight_file = args.pre_model_weight_path.format(args.model, args.running_idx, args.confusion_T, args.zero_out_ratio)
    print('Loading pre-trained model from {}'.format(pre_weight_file))

    model_weight_dir = args.model_weight_dir.format(args.model, args.mode, args.running_idx)
    if not os.path.exists(model_weight_dir):
        os.makedirs(model_weight_dir)
    print('Saving model weight to {}'.format(model_weight_dir))
    output_dir = args.output_dir.format(args.model, args.mode, args.running_idx)
    if not os.path.exists(output_dir):
        os.makedirs(output_dir)
    print('Saving output to {}'.format(output_dir))
    print()
    return pre_weight_file, model_weight_dir, output_dir


if __name__ == '__main__':
    args = parser.parse_args()
    args.cuda = not args.no_cuda and torch.cuda.is_available()
    print(args)

    torch.manual_seed(args.seed)
    if args.cuda:
        torch.cuda.manual_seed(args.seed)
    np.random.seed(args.seed)

    train_loader, test_loader = get_dataloader(args)

    model = get_model(args)
    pre_weight_file, model_weight_dir, output_dir = create_dir(args)
    model.load_state_dict(torch.load(pre_weight_file))
    if args.cuda:
        model.cuda()
        cudnn.benchmark = True
    init_model = copy.deepcopy(model)

    print('Training strategy: DA: {}\tl2: {}\tmomentum: {}'.format(args.DA_for_train, args.weight_decay, args.momentum))
    global_learning_rate = args.lr
    optimizer = optim.SGD(model.parameters(), lr=global_learning_rate, momentum=args.momentum, weight_decay=args.weight_decay)

    histogram_epoch_list = []
    training_prec1_list, training_prec5_list, training_loss_list = [], [], []
    test_prec1_list, test_prec5_list, test_loss_list = [], [], []
    margin_list, Frobenious_norm_list, l1_path_norm_list, l2_path_norm_list, spectral_norm_list = [], [], [], [], []

    ################## Initial State ##################
    print('Epoch: Initial')
    training_prec1, training_prec5, training_loss= test(model, train_loader, args)
    test_prec1, test_prec5, test_loss, margin = test_with_margin(model, test_loader, args)
    Frobenious_norm, l1_path_norm, l2_path_norm, spectral_norm = calculate_complexity(model, init_model, margin, args)
    histogram_epoch_list.append(0)
    training_prec1_list.append(training_prec1)
    training_prec5_list.append(training_prec5)
    training_loss_list.append(training_loss)
    test_prec1_list.append(test_prec1)
    test_prec5_list.append(test_prec5)
    test_loss_list.append(test_loss)
    margin_list.append(margin)
    Frobenious_norm_list.append(Frobenious_norm)
    l1_path_norm_list.append(l1_path_norm)
    l2_path_norm_list.append(l2_path_norm)
    spectral_norm_list.append(spectral_norm)
    print('training prec@1: {},\ttraining prec@5: {}\ttraining loss: {}\ntest prec@1: {},\ttest prec@5: {}\ttest loss: {}\n'.
          format(training_prec1, training_prec5, training_loss, test_prec1, test_prec5, test_loss))

    for i in range(1, 1 + args.epochs):
        print('Epoch: {}'.format(i))
        start_time = time.time()
        train(model, train_loader, optimizer, args)
        end_time = time.time()
        print('Training Process Time:\t', (end_time - start_time))

        if i in args.schedule:
            print('Changing learning rate, from\t', global_learning_rate),
            global_learning_rate *= args.gamma
            print('to\t', global_learning_rate)
            for param_group in optimizer.param_groups:
                param_group['lr'] = global_learning_rate

        if i % args.freq_report == 0 or i == args.epochs:
            training_prec1, training_prec5, training_loss = test(model, train_loader, args)
            test_prec1, test_prec5, test_loss, margin = test_with_margin(model, test_loader, args)
            Frobenious_norm, l1_path_norm, l2_path_norm, spectral_norm = calculate_complexity(model, init_model, margin, args)
            histogram_epoch_list.append(i)
            training_prec1_list.append(training_prec1)
            training_prec5_list.append(training_prec5)
            training_loss_list.append(training_loss)
            test_prec1_list.append(test_prec1)
            test_prec5_list.append(test_prec5)
            test_loss_list.append(test_loss)
            margin_list.append(margin)
            Frobenious_norm_list.append(Frobenious_norm)
            l1_path_norm_list.append(l1_path_norm)
            l2_path_norm_list.append(l2_path_norm)
            spectral_norm_list.append(spectral_norm)
            print('training prec@1: {},\ttraining prec@5: {}\ttraining loss: {}\ntest prec@1: {},\ttest prec@5: {}\ttest loss: {}\n'.
                  format(training_prec1, training_prec5, training_loss, test_prec1, test_prec5, test_loss))
            with open(args.epoch_weight_path.format(model_weight_dir, i, args.confusion_T, args.zero_out_ratio), 'wb') as f_:
                torch.save(model.state_dict(), f_)

    with open(args.model_weight_path.format(model_weight_dir, args.confusion_T, args.zero_out_ratio), 'wb') as f_:
        torch.save(model.state_dict(), f_)

    print()
    print('FGSM on train')
    train_epsilon_list, acc_list, train_perturbed_acc_list = get_fgsm_acc_list(model, train_loader)
    print('FGSM on test')
    test_epsilon_list, acc_list, test_perturbed_acc_list = get_fgsm_acc_list(model, test_loader)

    np.savez_compressed('{}/main_confusion_{}_zero_out_{}'.format(output_dir, args.confusion_T, args.zero_out_ratio),
                        training_prec1_list=training_prec1_list,
                        training_prec5_list=training_prec5_list,
                        training_loss_list=training_loss_list,
                        test_prec1_list=test_prec1_list,
                        test_prec5_list=test_prec5_list,
                        test_loss_list=test_loss_list,
                        training_acc_list=training_prec1_list,
                        test_acc_list=test_prec1_list,
                        margin_list=margin_list,
                        Frobenious_norm_list=Frobenious_norm_list,
                        l1_path_norm_list=l1_path_norm_list,
                        l2_path_norm_list=l2_path_norm_list,
                        spectral_norm_list=spectral_norm_list,
                        histogram_epoch_list=histogram_epoch_list,
                        train_epsilon_list=train_epsilon_list,
                        train_perturbed_acc_list=train_perturbed_acc_list,
                        test_epsilon_list=test_epsilon_list,
                        test_perturbed_acc_list=test_perturbed_acc_list)
