# Supplementary material
Source: ML conference proceedings conference paper supplement (https://proceedings.neurips.cc/paper_files/paper/2020/hash/618491e20a9b686b79e158c293ab4f91-Abstract.html)
Supplement: Supplementary file 1 [file 618491e20a9b686b79e158c293ab4f91-Supplemental.zip › codes/restricted_imagenet/preprocessing/02_fetch_subset_test.py]

from __future__ import print_function


def fetch_test_file(filename):
    with open(filename, 'r') as f:
        lines = f.readlines()

    for line in lines:
        line = line.strip()
        if line == '':
            continue

        line = line.split(' ')
        label = line[1]
        file_path = line[0]
        print('cp $DATASET_PATH/{} $OUTPUT_PATH/{}/'.format(file_path, label))

    return


if __name__ == '__main__':
    print('export DATASET_PATH=$1')
    print('export OUTPUT_PATH=$2')
    for i in range(9):
        print('mkdir -p $OUTPUT_PATH/{}'.format(i))

    fetch_test_file('val.txt')
