# Supplementary material
Source: ML conference proceedings conference paper supplement (https://proceedings.neurips.cc/paper_files/paper/2020/hash/618491e20a9b686b79e158c293ab4f91-Abstract.html)
Supplement: Supplementary file 1 [file 618491e20a9b686b79e158c293ab4f91-Supplemental.zip › codes/restricted_imagenet/preprocessing/train.txt]

n01641577/n01641577_10001.JPEG 2
n01641577/n01641577_10013.JPEG 2
n01641577/n01641577_10016.JPEG 2
n01641577/n01641577_10030.JPEG 2
n01641577/n01641577_10042.JPEG 2
n01641577/n01641577_10061.JPEG 2
n01641577/n01641577_10082.JPEG 2
n01641577/n01641577_10103.JPEG 2
n01641577/n01641577_10104.JPEG 2
n01641577/n01641577_1011.JPEG 2
n01641577/n01641577_10123.JPEG 2
n01641577/n01641577_10124.JPEG 2
n01641577/n01641577_10127.JPEG 2
n01641577/n01641577_10148.JPEG 2
n01641577/n01641577_10164.JPEG 2
n01641577/n01641577_10168.JPEG 2
n01641577/n01641577_10182.JPEG 2
n01641577/n01641577_1019.JPEG 2
n01641577/n01641577_10209.JPEG 2
n01641577/n01641577_10229.JPEG 2
n01641577/n01641577_10235.JPEG 2
n01641577/n01641577_10239.JPEG 2
n01641577/n01641577_10240.JPEG 2
n01641577/n01641577_10244.JPEG 2
n01641577/n01641577_10268.JPEG 2
n01641577/n01641577_1032.JPEG 2
n01641577/n01641577_1036.JPEG 2
n01641577/n01641577_10377.JPEG 2
n01641577/n01641577_10395.JPEG 2
n01641577/n01641577_10430.JPEG 2
n01641577/n01641577_10439.JPEG 2
n01641577/n01641577_10460.JPEG 2
n01641577/n01641577_10470.JPEG 2
n01641577/n01641577_10474.JPEG 2
n01641577/n01641577_10486.JPEG 2
n01641577/n01641577_10532.JPEG 2
n01641577/n01641577_10535.JPEG 2
n01641577/n01641577_10548.JPEG 2
n01641577/n01641577_1057.JPEG 2
n01641577/n01641577_10572.JPEG 2
n01641577/n01641577_106.JPEG 2
n01641577/n01641577_10681.JPEG 2
n01641577/n01641577_10709.JPEG 2
n01641577/n01641577_10715.JPEG 2
n01641577/n01641577_10723.JPEG 2
n01641577/n01641577_10747.JPEG 2
n01641577/n01641577_10763.JPEG 2
n01641577/n01641577_10789.JPEG 2
n01641577/n01641577_10811.JPEG 2
n01641577/n01641577_1084.JPEG 2
n01641577/n01641577_10853.JPEG 2
n01641577/n01641577_10859.JPEG 2
n01641577/n01641577_1093.JPEG 2
n01641577/n01641577_10938.JPEG 2
n01641577/n01641577_10949.JPEG 2
n01641577/n01641577_11015.JPEG 2
n01641577/n01641577_11039.JPEG 2
n01641577/n01641577_11040.JPEG 2
n01641577/n01641577_11054.JPEG 2
n01641577/n01641577_11070.JPEG 2
n01641577/n01641577_11136.JPEG 2
n01641577/n01641577_1122.JPEG 2
n01641577/n01641577_11243.JPEG 2
n01641577/n01641577_1125.JPEG 2
n01641577/n01641577_11253.JPEG 2
n01641577/n01641577_1127.JPEG 2
n01641577/n01641577_11275.JPEG 2
n01641577/n01641577_11328.JPEG 2
n01641577/n01641577_11375.JPEG 2
n01641577/n01641577_11410.JPEG 2
n01641577/n01641577_11454.JPEG 2
n01641577/n01641577_11460.JPEG 2
n01641577/n01641577_11499.JPEG 2
n01641577/n01641577_11557.JPEG 2
n01641577/n01641577_1156.JPEG 2
n01641577/n01641577_11571.JPEG 2
n01641577/n01641577_11581.JPEG 2
n01641577/n01641577_11583.JPEG 2
n01641577/n01641577_11586.JPEG 2
n01641577/n01641577_11587.JPEG 2
n01641577/n01641577_11635.JPEG 2
n01641577/n01641577_11642.JPEG 2
n01641577/n01641577_11647.JPEG 2
n01641577/n01641577_11686.JPEG 2
n01641577/n01641577_11695.JPEG 2
n01641577/n01641577_11710.JPEG 2
n01641577/n01641577_11722.JPEG 2
n01641577/n01641577_11726.JPEG 2
n01641577/n01641577_11736.JPEG 2
n01641577/n01641577_1175.JPEG 2
n01641577/n01641577_11772.JPEG 2
n01641577/n01641577_11774.JPEG 2
n01641577/n01641577_118.JPEG 2
n01641577/n01641577_11822.JPEG 2
n01641577/n01641577_11840.JPEG 2
n01641577/n01641577_1185.JPEG 2
n01641577/n01641577_11859.JPEG 2
n01641577/n01641577_11867.JPEG 2
n01641577/n01641577_11870.JPEG 2
n01641577/n01641577_11875.JPEG 2
n01641577/n01641577_11896.JPEG 2
n01641577/n01641577_11910.JPEG 2
n01641577/n01641577_11931.JPEG 2
n01641577/n01641577_11939.JPEG 2
n01641577/n01641577_1195.JPEG 2
n01641577/n01641577_11951.JPEG 2
n01641577/n01641577_1196.JPEG 2
n01641577/n01641577_11972.JPEG 2
n01641577/n01641577_11996.JPEG 2
n01641577/n01641577_11997.JPEG 2
n01641577/n01641577_12.JPEG 2
n01641577/n01641577_12002.JPEG 2
n01641577/n01641577_12010.JPEG 2
n01641577/n01641577_1202.JPEG 2
n01641577/n01641577_12030.JPEG 2
n01641577/n01641577_12034.JPEG 2
n01641577/n01641577_12042.JPEG 2
n01641577/n01641577_12046.JPEG 2
n01641577/n01641577_12078.JPEG 2
n01641577/n01641577_12090.JPEG 2
n01641577/n01641577_1210.JPEG 2
n01641577/n01641577_12106.JPEG 2
n01641577/n01641577_12176.JPEG 2
n01641577/n01641577_12194.JPEG 2
n01641577/n01641577_1224.JPEG 2
n01641577/n01641577_12252.JPEG 2
n01641577/n01641577_12258.JPEG 2
n01641577/n01641577_12278.JPEG 2
n01641577/n01641577_1229.JPEG 2
n01641577/n01641577_12300.JPEG 2
n01641577/n01641577_12306.JPEG 2
n01641577/n01641577_12316.JPEG 2
n01641577/n01641577_12321.JPEG 2
n01641577/n01641577_12327.JPEG 2
n01641577/n01641577_12347.JPEG 2
n01641577/n01641577_1238.JPEG 2
n01641577/n01641577_12456.JPEG 2
n01641577/n01641577_1247.JPEG 2
n01641577/n01641577_12479.JPEG 2
n01641577/n01641577_12541.JPEG 2
n01641577/n01641577_12562.JPEG 2
n01641577/n01641577_12568.JPEG 2
n01641577/n01641577_12574.JPEG 2
n01641577/n01641577_12577.JPEG 2
n01641577/n01641577_12590.JPEG 2
n01641577/n01641577_12600.JPEG 2
n01641577/n01641577_12611.JPEG 2
n01641577/n01641577_12619.JPEG 2
n01641577/n01641577_12624.JPEG 2
n01641577/n01641577_12635.JPEG 2
n01641577/n01641577_12639.JPEG 2
n01641577/n01641577_12658.JPEG 2
n01641577/n01641577_12679.JPEG 2
n01641577/n01641577_1270.JPEG 2
n01641577/n01641577_12706.JPEG 2
n01641577/n01641577_12717.JPEG 2
n01641577/n01641577_1272.JPEG 2
n01641577/n01641577_12725.JPEG 2
n01641577/n01641577_12727.JPEG 2
n01641577/n01641577_12733.JPEG 2
n01641577/n01641577_12734.JPEG 2
n01641577/n01641577_12737.JPEG 2
n01641577/n01641577_12742.JPEG 2
n01641577/n01641577_12748.JPEG 2
n01641577/n01641577_12766.JPEG 2
n01641577/n01641577_12770.JPEG 2
n01641577/n01641577_1279.JPEG 2
n01641577/n01641577_12791.JPEG 2
n01641577/n01641577_1280.JPEG 2
n01641577/n01641577_12819.JPEG 2
n01641577/n01641577_12888.JPEG 2
n01641577/n01641577_12931.JPEG 2
n01641577/n01641577_1294.JPEG 2
n01641577/n01641577_12955.JPEG 2
n01641577/n01641577_12977.JPEG 2
n01641577/n01641577_1298.JPEG 2
n01641577/n01641577_12983.JPEG 2
n01641577/n01641577_12988.JPEG 2
n01641577/n01641577_12998.JPEG 2
n01641577/n01641577_13.JPEG 2
n01641577/n01641577_13030.JPEG 2
n01641577/n01641577_13063.JPEG 2
n01641577/n01641577_1307.JPEG 2
n01641577/n01641577_13076.JPEG 2
n01641577/n01641577_1308.JPEG 2
n01641577/n01641577_13106.JPEG 2
n01641577/n01641577_1311.JPEG 2
n01641577/n01641577_1318.JPEG 2
n01641577/n01641577_13186.JPEG 2
n01641577/n01641577_13187.JPEG 2
n01641577/n01641577_13189.JPEG 2
n01641577/n01641577_13208.JPEG 2
n01641577/n01641577_1324.JPEG 2
n01641577/n01641577_13277.JPEG 2
n01641577/n01641577_1332.JPEG 2
n01641577/n01641577_13324.JPEG 2
n01641577/n01641577_13343.JPEG 2
n01641577/n01641577_13353.JPEG 2
n01641577/n01641577_13356.JPEG 2
n01641577/n01641577_13359.JPEG 2
n01641577/n01641577_13388.JPEG 2
n01641577/n01641577_13401.JPEG 2
n01641577/n01641577_13405.JPEG 2
n01641577/n01641577_13433.JPEG 2
n01641577/n01641577_13467.JPEG 2
n01641577/n01641577_135.JPEG 2
n01641577/n01641577_13528.JPEG 2
n01641577/n01641577_13530.JPEG 2
n01641577/n01641577_13541.JPEG 2
n01641577/n01641577_13542.JPEG 2
n01641577/n01641577_13555.JPEG 2
n01641577/n01641577_13556.JPEG 2
n01641577/n01641577_13606.JPEG 2
n01641577/n01641577_13629.JPEG 2
n01641577/n01641577_1363.JPEG 2
n01641577/n01641577_13649.JPEG 2
n01641577/n01641577_13658.JPEG 2
n01641577/n01641577_13696.JPEG 2
n01641577/n01641577_13703.JPEG 2
n01641577/n01641577_13727.JPEG 2
n01641577/n01641577_13734.JPEG 2
n01641577/n01641577_13757.JPEG 2
n01641577/n01641577_13764.JPEG 2
n01641577/n01641577_13769.JPEG 2
n01641577/n01641577_13774.JPEG 2
n01641577/n01641577_1378.JPEG 2
n01641577/n01641577_1379.JPEG 2
n01641577/n01641577_138.JPEG 2
n01641577/n01641577_13809.JPEG 2
n01641577/n01641577_13850.JPEG 2
n01641577/n01641577_13893.JPEG 2
n01641577/n01641577_13928.JPEG 2
n01641577/n01641577_13936.JPEG 2
n01641577/n01641577_13941.JPEG 2
n01641577/n01641577_13944.JPEG 2
n01641577/n01641577_13949.JPEG 2
n01641577/n01641577_13953.JPEG 2
n01641577/n01641577_13956.JPEG 2
n01641577/n01641577_13957.JPEG 2
n01641577/n01641577_13958.JPEG 2
n01641577/n01641577_13959.JPEG 2
n01641577/n01641577_13961.JPEG 2
n01641577/n01641577_13963.JPEG 2
n01641577/n01641577_13976.JPEG 2
n01641577/n01641577_13981.JPEG 2
n01641577/n01641577_13989.JPEG 2
n01641577/n01641577_1400.JPEG 2
n01641577/n01641577_14011.JPEG 2
n01641577/n01641577_14035.JPEG 2
n01641577/n01641577_1406.JPEG 2
n01641577/n01641577_14081.JPEG 2
n01641577/n01641577_14100.JPEG 2
n01641577/n01641577_14109.JPEG 2
n01641577/n01641577_14111.JPEG 2
n01641577/n01641577_14118.JPEG 2
n01641577/n01641577_14124.JPEG 2
n01641577/n01641577_14155.JPEG 2
n01641577/n01641577_14179.JPEG 2
n01641577/n01641577_14181.JPEG 2
n01641577/n01641577_14182.JPEG 2
n01641577/n01641577_14187.JPEG 2
n01641577/n01641577_14192.JPEG 2
n01641577/n01641577_14194.JPEG 2
n01641577/n01641577_14207.JPEG 2
n01641577/n01641577_1422.JPEG 2
n01641577/n01641577_14241.JPEG 2
n01641577/n01641577_14312.JPEG 2
n01641577/n01641577_14315.JPEG 2
n01641577/n01641577_14319.JPEG 2
n01641577/n01641577_14326.JPEG 2
n01641577/n01641577_14380.JPEG 2
n01641577/n01641577_14382.JPEG 2
n01641577/n01641577_14389.JPEG 2
n01641577/n01641577_14425.JPEG 2
n01641577/n01641577_14435.JPEG 2
n01641577/n01641577_14447.JPEG 2
n01641577/n01641577_14459.JPEG 2
n01641577/n01641577_14466.JPEG 2
n01641577/n01641577_14485.JPEG 2
n01641577/n01641577_14490.JPEG 2
n01641577/n01641577_14510.JPEG 2
n01641577/n01641577_14515.JPEG 2
n01641577/n01641577_14518.JPEG 2
n01641577/n01641577_14528.JPEG 2
n01641577/n01641577_14541.JPEG 2
n01641577/n01641577_1455.JPEG 2
n01641577/n01641577_1456.JPEG 2
n01641577/n01641577_14566.JPEG 2
n01641577/n01641577_14570.JPEG 2
n01641577/n01641577_14572.JPEG 2
n01641577/n01641577_14573.JPEG 2
n01641577/n01641577_14578.JPEG 2
n01641577/n01641577_1458.JPEG 2
n01641577/n01641577_14601.JPEG 2
n01641577/n01641577_1461.JPEG 2
n01641577/n01641577_14634.JPEG 2
n01641577/n01641577_14646.JPEG 2
n01641577/n01641577_14664.JPEG 2
n01641577/n01641577_14669.JPEG 2
n01641577/n01641577_14679.JPEG 2
n01641577/n01641577_14689.JPEG 2
n01641577/n01641577_14711.JPEG 2
n01641577/n01641577_14714.JPEG 2
n01641577/n01641577_14748.JPEG 2
n01641577/n01641577_14749.JPEG 2
n01641577/n01641577_14774.JPEG 2
n01641577/n01641577_14805.JPEG 2
n01641577/n01641577_14806.JPEG 2
n01641577/n01641577_14817.JPEG 2
n01641577/n01641577_1482.JPEG 2
n01641577/n01641577_14825.JPEG 2
n01641577/n01641577_14856.JPEG 2
n01641577/n01641577_14860.JPEG 2
n01641577/n01641577_14867.JPEG 2
n01641577/n01641577_14870.JPEG 2
n01641577/n01641577_14873.JPEG 2
n01641577/n01641577_14880.JPEG 2
n01641577/n01641577_14883.JPEG 2
n01641577/n01641577_14887.JPEG 2
n01641577/n01641577_14888.JPEG 2
n01641577/n01641577_14889.JPEG 2
n01641577/n01641577_14891.JPEG 2
n01641577/n01641577_14893.JPEG 2
n01641577/n01641577_14903.JPEG 2
n01641577/n01641577_1492.JPEG 2
n01641577/n01641577_14928.JPEG 2
n01641577/n01641577_1493.JPEG 2
n01641577/n01641577_14936.JPEG 2
n01641577/n01641577_14959.JPEG 2
n01641577/n01641577_14969.JPEG 2
n01641577/n01641577_1498.JPEG 2
n01641577/n01641577_14996.JPEG 2
n01641577/n01641577_14999.JPEG 2
n01641577/n01641577_150.JPEG 2
n01641577/n01641577_15002.JPEG 2
n01641577/n01641577_15007.JPEG 2
n01641577/n01641577_15009.JPEG 2
n01641577/n01641577_15029.JPEG 2
n01641577/n01641577_1504.JPEG 2
n01641577/n01641577_15052.JPEG 2
n01641577/n01641577_15061.JPEG 2
n01641577/n01641577_15077.JPEG 2
n01641577/n01641577_15078.JPEG 2
n01641577/n01641577_15089.JPEG 2
n01641577/n01641577_1510.JPEG 2
n01641577/n01641577_15109.JPEG 2
n01641577/n01641577_15112.JPEG 2
n01641577/n01641577_15115.JPEG 2
n01641577/n01641577_15131.JPEG 2
n01641577/n01641577_1516.JPEG 2
n01641577/n01641577_15166.JPEG 2
n01641577/n01641577_152.JPEG 2
n01641577/n01641577_15202.JPEG 2
n01641577/n01641577_15276.JPEG 2
n01641577/n01641577_15313.JPEG 2
n01641577/n01641577_15354.JPEG 2
n01641577/n01641577_15468.JPEG 2
n01641577/n01641577_15491.JPEG 2
n01641577/n01641577_15524.JPEG 2
n01641577/n01641577_15543.JPEG 2
n01641577/n01641577_15568.JPEG 2
n01641577/n01641577_15603.JPEG 2
n01641577/n01641577_15606.JPEG 2
n01641577/n01641577_15608.JPEG 2
n01641577/n01641577_15622.JPEG 2
n01641577/n01641577_15628.JPEG 2
n01641577/n01641577_15637.JPEG 2
n01641577/n01641577_15682.JPEG 2
n01641577/n01641577_1569.JPEG 2
n01641577/n01641577_1572.JPEG 2
n01641577/n01641577_15742.JPEG 2
n01641577/n01641577_15760.JPEG 2
n01641577/n01641577_15809.JPEG 2
n01641577/n01641577_1582.JPEG 2
n01641577/n01641577_15853.JPEG 2
n01641577/n01641577_15856.JPEG 2
n01641577/n01641577_15860.JPEG 2
n01641577/n01641577_15898.JPEG 2
n01641577/n01641577_15906.JPEG 2
n01641577/n01641577_15907.JPEG 2
n01641577/n01641577_15914.JPEG 2
n01641577/n01641577_1592.JPEG 2
n01641577/n01641577_15923.JPEG 2
n01641577/n01641577_15959.JPEG 2
n01641577/n01641577_1600.JPEG 2
n01641577/n01641577_16012.JPEG 2
n01641577/n01641577_16022.JPEG 2
n01641577/n01641577_16037.JPEG 2
n01641577/n01641577_16047.JPEG 2
n01641577/n01641577_16074.JPEG 2
n01641577/n01641577_1609.JPEG 2
n01641577/n01641577_16107.JPEG 2
n01641577/n01641577_16111.JPEG 2
n01641577/n01641577_16147.JPEG 2
n01641577/n01641577_16169.JPEG 2
n01641577/n01641577_16173.JPEG 2
n01641577/n01641577_16176.JPEG 2
n01641577/n01641577_1618.JPEG 2
n01641577/n01641577_1623.JPEG 2
n01641577/n01641577_16253.JPEG 2
n01641577/n01641577_16260.JPEG 2
n01641577/n01641577_16303.JPEG 2
n01641577/n01641577_16332.JPEG 2
n01641577/n01641577_1635.JPEG 2
n01641577/n01641577_16360.JPEG 2
n01641577/n01641577_16364.JPEG 2
n01641577/n01641577_1639.JPEG 2
n01641577/n01641577_16395.JPEG 2
n01641577/n01641577_16429.JPEG 2
n01641577/n01641577_16448.JPEG 2
n01641577/n01641577_16454.JPEG 2
n01641577/n01641577_16474.JPEG 2
n01641577/n01641577_16482.JPEG 2
n01641577/n01641577_16486.JPEG 2
n01641577/n01641577_16507.JPEG 2
n01641577/n01641577_16515.JPEG 2
n01641577/n01641577_1652.JPEG 2
n01641577/n01641577_16559.JPEG 2
n01641577/n01641577_16594.JPEG 2
n01641577/n01641577_16597.JPEG 2
n01641577/n01641577_16600.JPEG 2
n01641577/n01641577_16628.JPEG 2
n01641577/n01641577_16658.JPEG 2
n01641577/n01641577_16678.JPEG 2
n01641577/n01641577_16687.JPEG 2
n01641577/n01641577_167.JPEG 2
n01641577/n01641577_16702.JPEG 2
n01641577/n01641577_16703.JPEG 2
n01641577/n01641577_16720.JPEG 2
n01641577/n01641577_16727.JPEG 2
n01641577/n01641577_16730.JPEG 2
n01641577/n01641577_16747.JPEG 2
n01641577/n01641577_16752.JPEG 2
n01641577/n01641577_16777.JPEG 2
n01641577/n01641577_16787.JPEG 2
n01641577/n01641577_16793.JPEG 2
n01641577/n01641577_16796.JPEG 2
n01641577/n01641577_168.JPEG 2
n01641577/n01641577_16801.JPEG 2
n01641577/n01641577_16802.JPEG 2
n01641577/n01641577_16813.JPEG 2
n01641577/n01641577_16836.JPEG 2
n01641577/n01641577_16848.JPEG 2
n01641577/n01641577_16865.JPEG 2
n01641577/n01641577_16883.JPEG 2
n01641577/n01641577_16889.JPEG 2
n01641577/n01641577_169.JPEG 2
n01641577/n01641577_16908.JPEG 2
n01641577/n01641577_16916.JPEG 2
n01641577/n01641577_16922.JPEG 2
n01641577/n01641577_16945.JPEG 2
n01641577/n01641577_16988.JPEG 2
n01641577/n01641577_17012.JPEG 2
n01641577/n01641577_17017.JPEG 2
n01641577/n01641577_17021.JPEG 2
n01641577/n01641577_1705.JPEG 2
n01641577/n01641577_17055.JPEG 2
n01641577/n01641577_17056.JPEG 2
n01641577/n01641577_17061.JPEG 2
n01641577/n01641577_17063.JPEG 2
n01641577/n01641577_17069.JPEG 2
n01641577/n01641577_17097.JPEG 2
n01641577/n01641577_17099.JPEG 2
n01641577/n01641577_17105.JPEG 2
n01641577/n01641577_17121.JPEG 2
n01641577/n01641577_17141.JPEG 2
n01641577/n01641577_17147.JPEG 2
n01641577/n01641577_17148.JPEG 2
n01641577/n01641577_17150.JPEG 2
n01641577/n01641577_17166.JPEG 2
n01641577/n01641577_17177.JPEG 2
n01641577/n01641577_1720.JPEG 2
n01641577/n01641577_17203.JPEG 2
n01641577/n01641577_17204.JPEG 2
n01641577/n01641577_17222.JPEG 2
n01641577/n01641577_17233.JPEG 2
n01641577/n01641577_17260.JPEG 2
n01641577/n01641577_17305.JPEG 2
n01641577/n01641577_17375.JPEG 2
n01641577/n01641577_17396.JPEG 2
n01641577/n01641577_17407.JPEG 2
n01641577/n01641577_17417.JPEG 2
n01641577/n01641577_17431.JPEG 2
n01641577/n01641577_17434.JPEG 2
n01641577/n01641577_17538.JPEG 2
n01641577/n01641577_17557.JPEG 2
n01641577/n01641577_17577.JPEG 2
n01641577/n01641577_17594.JPEG 2
n01641577/n01641577_17659.JPEG 2
n01641577/n01641577_17721.JPEG 2
n01641577/n01641577_17738.JPEG 2
n01641577/n01641577_17741.JPEG 2
n01641577/n01641577_17753.JPEG 2
n01641577/n01641577_1776.JPEG 2
n01641577/n01641577_17841.JPEG 2
n01641577/n01641577_17842.JPEG 2
n01641577/n01641577_1785.JPEG 2
n01641577/n01641577_17859.JPEG 2
n01641577/n01641577_1789.JPEG 2
n01641577/n01641577_17902.JPEG 2
n01641577/n01641577_1792.JPEG 2
n01641577/n01641577_17927.JPEG 2
n01641577/n01641577_17952.JPEG 2
n01641577/n01641577_1796.JPEG 2
n01641577/n01641577_17963.JPEG 2
n01641577/n01641577_17968.JPEG 2
n01641577/n01641577_18014.JPEG 2
n01641577/n01641577_18051.JPEG 2
n01641577/n01641577_18076.JPEG 2
n01641577/n01641577_18094.JPEG 2
n01641577/n01641577_1810.JPEG 2
n01641577/n01641577_18121.JPEG 2
n01641577/n01641577_18135.JPEG 2
n01641577/n01641577_18146.JPEG 2
n01641577/n01641577_18167.JPEG 2
n01641577/n01641577_18186.JPEG 2
n01641577/n01641577_18204.JPEG 2
n01641577/n01641577_18211.JPEG 2
n01641577/n01641577_18224.JPEG 2
n01641577/n01641577_1832.JPEG 2
n01641577/n01641577_18329.JPEG 2
n01641577/n01641577_1834.JPEG 2
n01641577/n01641577_18406.JPEG 2
n01641577/n01641577_18409.JPEG 2
n01641577/n01641577_18434.JPEG 2
n01641577/n01641577_18453.JPEG 2
n01641577/n01641577_18465.JPEG 2
n01641577/n01641577_1851.JPEG 2
n01641577/n01641577_1853.JPEG 2
n01641577/n01641577_18582.JPEG 2
n01641577/n01641577_18611.JPEG 2
n01641577/n01641577_18667.JPEG 2
n01641577/n01641577_18719.JPEG 2
n01641577/n01641577_18761.JPEG 2
n01641577/n01641577_1882.JPEG 2
n01641577/n01641577_18922.JPEG 2
n01641577/n01641577_18930.JPEG 2
n01641577/n01641577_18936.JPEG 2
n01641577/n01641577_18976.JPEG 2
n01641577/n01641577_19021.JPEG 2
n01641577/n01641577_1924.JPEG 2
n01641577/n01641577_1956.JPEG 2
n01641577/n01641577_1963.JPEG 2
n01641577/n01641577_19688.JPEG 2
n01641577/n01641577_1969.JPEG 2
n01641577/n01641577_19828.JPEG 2
n01641577/n01641577_199.JPEG 2
n01641577/n01641577_1998.JPEG 2
n01641577/n01641577_2004.JPEG 2
n01641577/n01641577_20042.JPEG 2
n01641577/n01641577_2005.JPEG 2
n01641577/n01641577_20086.JPEG 2
n01641577/n01641577_20146.JPEG 2
n01641577/n01641577_2020.JPEG 2
n01641577/n01641577_2021.JPEG 2
n01641577/n01641577_2026.JPEG 2
n01641577/n01641577_20260.JPEG 2
n01641577/n01641577_20274.JPEG 2
n01641577/n01641577_2028.JPEG 2
n01641577/n01641577_2036.JPEG 2
n01641577/n01641577_20404.JPEG 2
n01641577/n01641577_20461.JPEG 2
n01641577/n01641577_2049.JPEG 2
n01641577/n01641577_20505.JPEG 2
n01641577/n01641577_20525.JPEG 2
n01641577/n01641577_20603.JPEG 2
n01641577/n01641577_20612.JPEG 2
n01641577/n01641577_20672.JPEG 2
n01641577/n01641577_20708.JPEG 2
n01641577/n01641577_20778.JPEG 2
n01641577/n01641577_2080.JPEG 2
n01641577/n01641577_20806.JPEG 2
n01641577/n01641577_2083.JPEG 2
n01641577/n01641577_20871.JPEG 2
n01641577/n01641577_20876.JPEG 2
n01641577/n01641577_20949.JPEG 2
n01641577/n01641577_2098.JPEG 2
n01641577/n01641577_21046.JPEG 2
n01641577/n01641577_21111.JPEG 2
n01641577/n01641577_2114.JPEG 2
n01641577/n01641577_21174.JPEG 2
n01641577/n01641577_21273.JPEG 2
n01641577/n01641577_21313.JPEG 2
n01641577/n01641577_21319.JPEG 2
n01641577/n01641577_214.JPEG 2
n01641577/n01641577_2142.JPEG 2
n01641577/n01641577_21453.JPEG 2
n01641577/n01641577_2149.JPEG 2
n01641577/n01641577_215.JPEG 2
n01641577/n01641577_2167.JPEG 2
n01641577/n01641577_21685.JPEG 2
n01641577/n01641577_217.JPEG 2
n01641577/n01641577_21708.JPEG 2
n01641577/n01641577_21763.JPEG 2
n01641577/n01641577_21765.JPEG 2
n01641577/n01641577_2179.JPEG 2
n01641577/n01641577_218.JPEG 2
n01641577/n01641577_21836.JPEG 2
n01641577/n01641577_21883.JPEG 2
n01641577/n01641577_21898.JPEG 2
n01641577/n01641577_21911.JPEG 2
n01641577/n01641577_21928.JPEG 2
n01641577/n01641577_21959.JPEG 2
n01641577/n01641577_21969.JPEG 2
n01641577/n01641577_21982.JPEG 2
n01641577/n01641577_22000.JPEG 2
n01641577/n01641577_22009.JPEG 2
n01641577/n01641577_22018.JPEG 2
n01641577/n01641577_22019.JPEG 2
n01641577/n01641577_22025.JPEG 2
n01641577/n01641577_22055.JPEG 2
n01641577/n01641577_22057.JPEG 2
n01641577/n01641577_22082.JPEG 2
n01641577/n01641577_22128.JPEG 2
n01641577/n01641577_2217.JPEG 2
n01641577/n01641577_22201.JPEG 2
n01641577/n01641577_22203.JPEG 2
n01641577/n01641577_22208.JPEG 2
n01641577/n01641577_22224.JPEG 2
n01641577/n01641577_22228.JPEG 2
n01641577/n01641577_22230.JPEG 2
n01641577/n01641577_22242.JPEG 2
n01641577/n01641577_2225.JPEG 2
n01641577/n01641577_22296.JPEG 2
n01641577/n01641577_22311.JPEG 2
n01641577/n01641577_22313.JPEG 2
n01641577/n01641577_2232.JPEG 2
n01641577/n01641577_22321.JPEG 2
n01641577/n01641577_22338.JPEG 2
n01641577/n01641577_2234.JPEG 2
n01641577/n01641577_22342.JPEG 2
n01641577/n01641577_22375.JPEG 2
n01641577/n01641577_22394.JPEG 2
n01641577/n01641577_22439.JPEG 2
n01641577/n01641577_2245.JPEG 2
n01641577/n01641577_22470.JPEG 2
n01641577/n01641577_2248.JPEG 2
n01641577/n01641577_2253.JPEG 2
n01641577/n01641577_22554.JPEG 2
n01641577/n01641577_22562.JPEG 2
n01641577/n01641577_2259.JPEG 2
n01641577/n01641577_22615.JPEG 2
n01641577/n01641577_22637.JPEG 2
n01641577/n01641577_2270.JPEG 2
n01641577/n01641577_22706.JPEG 2
n01641577/n01641577_22737.JPEG 2
n01641577/n01641577_22738.JPEG 2
n01641577/n01641577_22761.JPEG 2
n01641577/n01641577_22778.JPEG 2
n01641577/n01641577_22849.JPEG 2
n01641577/n01641577_22859.JPEG 2
n01641577/n01641577_22871.JPEG 2
n01641577/n01641577_22873.JPEG 2
n01641577/n01641577_22907.JPEG 2
n01641577/n01641577_2292.JPEG 2
n01641577/n01641577_22931.JPEG 2
n01641577/n01641577_22955.JPEG 2
n01641577/n01641577_22958.JPEG 2
n01641577/n01641577_22978.JPEG 2
n01641577/n01641577_22998.JPEG 2
n01641577/n01641577_2320.JPEG 2
n01641577/n01641577_2346.JPEG 2
n01641577/n01641577_2355.JPEG 2
n01641577/n01641577_2367.JPEG 2
n01641577/n01641577_237.JPEG 2
n01641577/n01641577_2370.JPEG 2
n01641577/n01641577_239.JPEG 2
n01641577/n01641577_2402.JPEG 2
n01641577/n01641577_243.JPEG 2
n01641577/n01641577_2444.JPEG 2
n01641577/n01641577_2460.JPEG 2
n01641577/n01641577_2464.JPEG 2
n01641577/n01641577_247.JPEG 2
n01641577/n01641577_2476.JPEG 2
n01641577/n01641577_2480.JPEG 2
n01641577/n01641577_2485.JPEG 2
n01641577/n01641577_2494.JPEG 2
n01641577/n01641577_2495.JPEG 2
n01641577/n01641577_2502.JPEG 2
n01641577/n01641577_2506.JPEG 2
n01641577/n01641577_2526.JPEG 2
n01641577/n01641577_2533.JPEG 2
n01641577/n01641577_255.JPEG 2
n01641577/n01641577_256.JPEG 2
n01641577/n01641577_2566.JPEG 2
n01641577/n01641577_2567.JPEG 2
n01641577/n01641577_2573.JPEG 2
n01641577/n01641577_2575.JPEG 2
n01641577/n01641577_2577.JPEG 2
n01641577/n01641577_2580.JPEG 2
n01641577/n01641577_2582.JPEG 2
n01641577/n01641577_2608.JPEG 2
n01641577/n01641577_2630.JPEG 2
n01641577/n01641577_2633.JPEG 2
n01641577/n01641577_2637.JPEG 2
n01641577/n01641577_2645.JPEG 2
n01641577/n01641577_2667.JPEG 2
n01641577/n01641577_2669.JPEG 2
n01641577/n01641577_271.JPEG 2
n01641577/n01641577_2731.JPEG 2
n01641577/n01641577_2738.JPEG 2
n01641577/n01641577_2779.JPEG 2
n01641577/n01641577_278.JPEG 2
n01641577/n01641577_28.JPEG 2
n01641577/n01641577_2802.JPEG 2
n01641577/n01641577_2803.JPEG 2
n01641577/n01641577_2808.JPEG 2
n01641577/n01641577_2813.JPEG 2
n01641577/n01641577_2814.JPEG 2
n01641577/n01641577_2816.JPEG 2
n01641577/n01641577_284.JPEG 2
n01641577/n01641577_2843.JPEG 2
n01641577/n01641577_2847.JPEG 2
n01641577/n01641577_2884.JPEG 2
n01641577/n01641577_2906.JPEG 2
n01641577/n01641577_291.JPEG 2
n01641577/n01641577_2910.JPEG 2
n01641577/n01641577_2933.JPEG 2
n01641577/n01641577_294.JPEG 2
n01641577/n01641577_2942.JPEG 2
n01641577/n01641577_2966.JPEG 2
n01641577/n01641577_297.JPEG 2
n01641577/n01641577_2977.JPEG 2
n01641577/n01641577_3008.JPEG 2
n01641577/n01641577_3022.JPEG 2
n01641577/n01641577_3023.JPEG 2
n01641577/n01641577_3025.JPEG 2
n01641577/n01641577_3071.JPEG 2
n01641577/n01641577_3074.JPEG 2
n01641577/n01641577_3075.JPEG 2
n01641577/n01641577_3081.JPEG 2
n01641577/n01641577_3084.JPEG 2
n01641577/n01641577_3091.JPEG 2
n01641577/n01641577_3110.JPEG 2
n01641577/n01641577_312.JPEG 2
n01641577/n01641577_3123.JPEG 2
n01641577/n01641577_3135.JPEG 2
n01641577/n01641577_3155.JPEG 2
n01641577/n01641577_3169.JPEG 2
n01641577/n01641577_318.JPEG 2
n01641577/n01641577_3192.JPEG 2
n01641577/n01641577_3200.JPEG 2
n01641577/n01641577_3203.JPEG 2
n01641577/n01641577_3222.JPEG 2
n01641577/n01641577_3227.JPEG 2
n01641577/n01641577_3246.JPEG 2
n01641577/n01641577_3260.JPEG 2
n01641577/n01641577_3268.JPEG 2
n01641577/n01641577_3270.JPEG 2
n01641577/n01641577_3303.JPEG 2
n01641577/n01641577_333.JPEG 2
n01641577/n01641577_3339.JPEG 2
n01641577/n01641577_3358.JPEG 2
n01641577/n01641577_3373.JPEG 2
n01641577/n01641577_34.JPEG 2
n01641577/n01641577_3403.JPEG 2
n01641577/n01641577_3411.JPEG 2
n01641577/n01641577_3414.JPEG 2
n01641577/n01641577_3421.JPEG 2
n01641577/n01641577_3435.JPEG 2
n01641577/n01641577_3443.JPEG 2
n01641577/n01641577_3462.JPEG 2
n01641577/n01641577_3484.JPEG 2
n01641577/n01641577_3529.JPEG 2
n01641577/n01641577_3535.JPEG 2
n01641577/n01641577_3537.JPEG 2
n01641577/n01641577_354.JPEG 2
n01641577/n01641577_3546.JPEG 2
n01641577/n01641577_3553.JPEG 2
n01641577/n01641577_356.JPEG 2
n01641577/n01641577_3563.JPEG 2
n01641577/n01641577_3595.JPEG 2
n01641577/n01641577_3606.JPEG 2
n01641577/n01641577_3621.JPEG 2
n01641577/n01641577_3625.JPEG 2
n01641577/n01641577_3634.JPEG 2
n01641577/n01641577_3653.JPEG 2
n01641577/n01641577_3672.JPEG 2
n01641577/n01641577_3676.JPEG 2
n01641577/n01641577_3702.JPEG 2
n01641577/n01641577_3703.JPEG 2
n01641577/n01641577_3706.JPEG 2
n01641577/n01641577_3710.JPEG 2
n01641577/n01641577_3730.JPEG 2
n01641577/n01641577_3731.JPEG 2
n01641577/n01641577_3737.JPEG 2
n01641577/n01641577_3738.JPEG 2
n01641577/n01641577_3742.JPEG 2
n01641577/n01641577_3754.JPEG 2
n01641577/n01641577_3785.JPEG 2
n01641577/n01641577_3793.JPEG 2
n01641577/n01641577_3795.JPEG 2
n01641577/n01641577_38.JPEG 2
n01641577/n01641577_380.JPEG 2
n01641577/n01641577_381.JPEG 2
n01641577/n01641577_383.JPEG 2
n01641577/n01641577_3843.JPEG 2
n01641577/n01641577_3844.JPEG 2
n01641577/n01641577_3855.JPEG 2
n01641577/n01641577_3859.JPEG 2
n01641577/n01641577_386.JPEG 2
n01641577/n01641577_3876.JPEG 2
n01641577/n01641577_388.JPEG 2
n01641577/n01641577_3890.JPEG 2
n01641577/n01641577_3895.JPEG 2
n01641577/n01641577_3899.JPEG 2
n01641577/n01641577_3903.JPEG 2
n01641577/n01641577_3910.JPEG 2
n01641577/n01641577_3913.JPEG 2
n01641577/n01641577_3923.JPEG 2
n01641577/n01641577_3957.JPEG 2
n01641577/n01641577_3961.JPEG 2
n01641577/n01641577_3969.JPEG 2
n01641577/n01641577_400.JPEG 2
n01641577/n01641577_401.JPEG 2
n01641577/n01641577_4022.JPEG 2
n01641577/n01641577_4030.JPEG 2
n01641577/n01641577_4034.JPEG 2
n01641577/n01641577_4037.JPEG 2
n01641577/n01641577_4051.JPEG 2
n01641577/n01641577_4066.JPEG 2
n01641577/n01641577_407.JPEG 2
n01641577/n01641577_4121.JPEG 2
n01641577/n01641577_4138.JPEG 2
n01641577/n01641577_414.JPEG 2
n01641577/n01641577_4141.JPEG 2
n01641577/n01641577_4154.JPEG 2
n01641577/n01641577_4190.JPEG 2
n01641577/n01641577_4194.JPEG 2
n01641577/n01641577_4195.JPEG 2
n01641577/n01641577_4206.JPEG 2
n01641577/n01641577_4216.JPEG 2
n01641577/n01641577_422.JPEG 2
n01641577/n01641577_4226.JPEG 2
n01641577/n01641577_425.JPEG 2
n01641577/n01641577_428.JPEG 2
n01641577/n01641577_4285.JPEG 2
n01641577/n01641577_429.JPEG 2
n01641577/n01641577_4297.JPEG 2
n01641577/n01641577_4310.JPEG 2
n01641577/n01641577_433.JPEG 2
n01641577/n01641577_4337.JPEG 2
n01641577/n01641577_435.JPEG 2
n01641577/n01641577_4359.JPEG 2
n01641577/n01641577_4360.JPEG 2
n01641577/n01641577_4365.JPEG 2
n01641577/n01641577_4373.JPEG 2
n01641577/n01641577_438.JPEG 2
n01641577/n01641577_4392.JPEG 2
n01641577/n01641577_44.JPEG 2
n01641577/n01641577_4425.JPEG 2
n01641577/n01641577_4439.JPEG 2
n01641577/n01641577_4443.JPEG 2
n01641577/n01641577_4445.JPEG 2
n01641577/n01641577_4446.JPEG 2
n01641577/n01641577_4448.JPEG 2
n01641577/n01641577_4451.JPEG 2
n01641577/n01641577_446.JPEG 2
n01641577/n01641577_4468.JPEG 2
n01641577/n01641577_447.JPEG 2
n01641577/n01641577_4501.JPEG 2
n01641577/n01641577_4527.JPEG 2
n01641577/n01641577_4541.JPEG 2
n01641577/n01641577_4546.JPEG 2
n01641577/n01641577_4550.JPEG 2
n01641577/n01641577_4555.JPEG 2
n01641577/n01641577_4561.JPEG 2
n01641577/n01641577_4568.JPEG 2
n01641577/n01641577_4572.JPEG 2
n01641577/n01641577_4573.JPEG 2
n01641577/n01641577_4631.JPEG 2
n01641577/n01641577_4649.JPEG 2
n01641577/n01641577_4654.JPEG 2
n01641577/n01641577_4673.JPEG 2
n01641577/n01641577_468.JPEG 2
n01641577/n01641577_4695.JPEG 2
n01641577/n01641577_4702.JPEG 2
n01641577/n01641577_4707.JPEG 2
n01641577/n01641577_473.JPEG 2
n01641577/n01641577_4734.JPEG 2
n01641577/n01641577_4736.JPEG 2
n01641577/n01641577_4757.JPEG 2
n01641577/n01641577_4794.JPEG 2
n01641577/n01641577_48.JPEG 2
n01641577/n01641577_4820.JPEG 2
n01641577/n01641577_4844.JPEG 2
n01641577/n01641577_4862.JPEG 2
n01641577/n01641577_4869.JPEG 2
n01641577/n01641577_487.JPEG 2
n01641577/n01641577_4871.JPEG 2
n01641577/n01641577_4901.JPEG 2
n01641577/n01641577_4902.JPEG 2
n01641577/n01641577_4911.JPEG 2
n01641577/n01641577_4912.JPEG 2
n01641577/n01641577_4913.JPEG 2
n01641577/n01641577_4924.JPEG 2
n01641577/n01641577_4942.JPEG 2
n01641577/n01641577_4952.JPEG 2
n01641577/n01641577_4961.JPEG 2
n01641577/n01641577_4977.JPEG 2
n01641577/n01641577_4981.JPEG 2
n01641577/n01641577_4989.JPEG 2
n01641577/n01641577_5020.JPEG 2
n01641577/n01641577_5074.JPEG 2
n01641577/n01641577_5086.JPEG 2
n01641577/n01641577_512.JPEG 2
n01641577/n01641577_513.JPEG 2
n01641577/n01641577_5143.JPEG 2
n01641577/n01641577_5145.JPEG 2
n01641577/n01641577_5149.JPEG 2
n01641577/n01641577_516.JPEG 2
n01641577/n01641577_517.JPEG 2
n01641577/n01641577_5176.JPEG 2
n01641577/n01641577_521.JPEG 2
n01641577/n01641577_5210.JPEG 2
n01641577/n01641577_5262.JPEG 2
n01641577/n01641577_5325.JPEG 2
n01641577/n01641577_5358.JPEG 2
n01641577/n01641577_5379.JPEG 2
n01641577/n01641577_5383.JPEG 2
n01641577/n01641577_5385.JPEG 2
n01641577/n01641577_5404.JPEG 2
n01641577/n01641577_5408.JPEG 2
n01641577/n01641577_5416.JPEG 2
n01641577/n01641577_547.JPEG 2
n01641577/n01641577_55.JPEG 2
n01641577/n01641577_5501.JPEG 2
n01641577/n01641577_5512.JPEG 2
n01641577/n01641577_5529.JPEG 2
n01641577/n01641577_5539.JPEG 2
n01641577/n01641577_5541.JPEG 2
n01641577/n01641577_5569.JPEG 2
n01641577/n01641577_5588.JPEG 2
n01641577/n01641577_5610.JPEG 2
n01641577/n01641577_562.JPEG 2
n01641577/n01641577_5622.JPEG 2
n01641577/n01641577_5637.JPEG 2
n01641577/n01641577_5643.JPEG 2
n01641577/n01641577_5653.JPEG 2
n01641577/n01641577_5655.JPEG 2
n01641577/n01641577_5665.JPEG 2
n01641577/n01641577_5675.JPEG 2
n01641577/n01641577_568.JPEG 2
n01641577/n01641577_569.JPEG 2
n01641577/n01641577_5695.JPEG 2
n01641577/n01641577_57.JPEG 2
n01641577/n01641577_5700.JPEG 2
n01641577/n01641577_5728.JPEG 2
n01641577/n01641577_5752.JPEG 2
n01641577/n01641577_5804.JPEG 2
n01641577/n01641577_5821.JPEG 2
n01641577/n01641577_5836.JPEG 2
n01641577/n01641577_5840.JPEG 2
n01641577/n01641577_5857.JPEG 2
n01641577/n01641577_5866.JPEG 2
n01641577/n01641577_5886.JPEG 2
n01641577/n01641577_5897.JPEG 2
n01641577/n01641577_591.JPEG 2
n01641577/n01641577_5932.JPEG 2
n01641577/n01641577_5937.JPEG 2
n01641577/n01641577_594.JPEG 2
n01641577/n01641577_595.JPEG 2
n01641577/n01641577_5958.JPEG 2
n01641577/n01641577_5987.JPEG 2
n01641577/n01641577_5993.JPEG 2
n01641577/n01641577_60.JPEG 2
n01641577/n01641577_6003.JPEG 2
n01641577/n01641577_6005.JPEG 2
n01641577/n01641577_6032.JPEG 2
n01641577/n01641577_6037.JPEG 2
n01641577/n01641577_6066.JPEG 2
n01641577/n01641577_6071.JPEG 2
n01641577/n01641577_6079.JPEG 2
n01641577/n01641577_6081.JPEG 2
n01641577/n01641577_6086.JPEG 2
n01641577/n01641577_6087.JPEG 2
n01641577/n01641577_6104.JPEG 2
n01641577/n01641577_6106.JPEG 2
n01641577/n01641577_6108.JPEG 2
n01641577/n01641577_6128.JPEG 2
n01641577/n01641577_6134.JPEG 2
n01641577/n01641577_6142.JPEG 2
n01641577/n01641577_6152.JPEG 2
n01641577/n01641577_6156.JPEG 2
n01641577/n01641577_6169.JPEG 2
n01641577/n01641577_6170.JPEG 2
n01641577/n01641577_6174.JPEG 2
n01641577/n01641577_6178.JPEG 2
n01641577/n01641577_6179.JPEG 2
n01641577/n01641577_6182.JPEG 2
n01641577/n01641577_6197.JPEG 2
n01641577/n01641577_6205.JPEG 2
n01641577/n01641577_6211.JPEG 2
n01641577/n01641577_6219.JPEG 2
n01641577/n01641577_623.JPEG 2
n01641577/n01641577_6254.JPEG 2
n01641577/n01641577_6261.JPEG 2
n01641577/n01641577_6272.JPEG 2
n01641577/n01641577_6287.JPEG 2
n01641577/n01641577_6298.JPEG 2
n01641577/n01641577_63.JPEG 2
n01641577/n01641577_6333.JPEG 2
n01641577/n01641577_635.JPEG 2
n01641577/n01641577_6365.JPEG 2
n01641577/n01641577_642.JPEG 2
n01641577/n01641577_6420.JPEG 2
n01641577/n01641577_643.JPEG 2
n01641577/n01641577_6457.JPEG 2
n01641577/n01641577_6470.JPEG 2
n01641577/n01641577_6482.JPEG 2
n01641577/n01641577_6498.JPEG 2
n01641577/n01641577_6514.JPEG 2
n01641577/n01641577_6520.JPEG 2
n01641577/n01641577_6536.JPEG 2
n01641577/n01641577_6546.JPEG 2
n01641577/n01641577_6551.JPEG 2
n01641577/n01641577_6558.JPEG 2
n01641577/n01641577_6559.JPEG 2
n01641577/n01641577_6560.JPEG 2
n01641577/n01641577_6596.JPEG 2
n01641577/n01641577_66.JPEG 2
n01641577/n01641577_6604.JPEG 2
n01641577/n01641577_6615.JPEG 2
n01641577/n01641577_662.JPEG 2
n01641577/n01641577_6644.JPEG 2
n01641577/n01641577_665.JPEG 2
n01641577/n01641577_6651.JPEG 2
n01641577/n01641577_6671.JPEG 2
n01641577/n01641577_6677.JPEG 2
n01641577/n01641577_6686.JPEG 2
n01641577/n01641577_6700.JPEG 2
n01641577/n01641577_6701.JPEG 2
n01641577/n01641577_6735.JPEG 2
n01641577/n01641577_6747.JPEG 2
n01641577/n01641577_676.JPEG 2
n01641577/n01641577_6770.JPEG 2
n01641577/n01641577_6777.JPEG 2
n01641577/n01641577_6824.JPEG 2
n01641577/n01641577_6842.JPEG 2
n01641577/n01641577_687.JPEG 2
n01641577/n01641577_6884.JPEG 2
n01641577/n01641577_692.JPEG 2
n01641577/n01641577_6926.JPEG 2
n01641577/n01641577_6942.JPEG 2
n01641577/n01641577_6954.JPEG 2
n01641577/n01641577_6957.JPEG 2
n01641577/n01641577_6978.JPEG 2
n01641577/n01641577_6980.JPEG 2
n01641577/n01641577_6998.JPEG 2
n01641577/n01641577_7000.JPEG 2
n01641577/n01641577_7035.JPEG 2
n01641577/n01641577_704.JPEG 2
n01641577/n01641577_7041.JPEG 2
n01641577/n01641577_705.JPEG 2
n01641577/n01641577_7066.JPEG 2
n01641577/n01641577_7087.JPEG 2
n01641577/n01641577_7109.JPEG 2
n01641577/n01641577_7121.JPEG 2
n01641577/n01641577_7138.JPEG 2
n01641577/n01641577_7149.JPEG 2
n01641577/n01641577_7162.JPEG 2
n01641577/n01641577_7177.JPEG 2
n01641577/n01641577_718.JPEG 2
n01641577/n01641577_7180.JPEG 2
n01641577/n01641577_7206.JPEG 2
n01641577/n01641577_721.JPEG 2
n01641577/n01641577_7218.JPEG 2
n01641577/n01641577_7250.JPEG 2
n01641577/n01641577_7261.JPEG 2
n01641577/n01641577_7279.JPEG 2
n01641577/n01641577_7316.JPEG 2
n01641577/n01641577_7336.JPEG 2
n01641577/n01641577_7351.JPEG 2
n01641577/n01641577_736.JPEG 2
n01641577/n01641577_7363.JPEG 2
n01641577/n01641577_7370.JPEG 2
n01641577/n01641577_7407.JPEG 2
n01641577/n01641577_7413.JPEG 2
n01641577/n01641577_7418.JPEG 2
n01641577/n01641577_7431.JPEG 2
n01641577/n01641577_7439.JPEG 2
n01641577/n01641577_744.JPEG 2
n01641577/n01641577_7440.JPEG 2
n01641577/n01641577_7442.JPEG 2
n01641577/n01641577_7445.JPEG 2
n01641577/n01641577_7454.JPEG 2
n01641577/n01641577_7467.JPEG 2
n01641577/n01641577_7470.JPEG 2
n01641577/n01641577_7480.JPEG 2
n01641577/n01641577_7493.JPEG 2
n01641577/n01641577_7539.JPEG 2
n01641577/n01641577_754.JPEG 2
n01641577/n01641577_755.JPEG 2
n01641577/n01641577_756.JPEG 2
n01641577/n01641577_759.JPEG 2
n01641577/n01641577_7597.JPEG 2
n01641577/n01641577_7641.JPEG 2
n01641577/n01641577_7645.JPEG 2
n01641577/n01641577_7674.JPEG 2
n01641577/n01641577_7694.JPEG 2
n01641577/n01641577_7699.JPEG 2
n01641577/n01641577_771.JPEG 2
n01641577/n01641577_7710.JPEG 2
n01641577/n01641577_7714.JPEG 2
n01641577/n01641577_772.JPEG 2
n01641577/n01641577_7724.JPEG 2
n01641577/n01641577_7729.JPEG 2
n01641577/n01641577_7744.JPEG 2
n01641577/n01641577_7754.JPEG 2
n01641577/n01641577_7756.JPEG 2
n01641577/n01641577_7761.JPEG 2
n01641577/n01641577_7764.JPEG 2
n01641577/n01641577_777.JPEG 2
n01641577/n01641577_7789.JPEG 2
n01641577/n01641577_7797.JPEG 2
n01641577/n01641577_78.JPEG 2
n01641577/n01641577_780.JPEG 2
n01641577/n01641577_7812.JPEG 2
n01641577/n01641577_7825.JPEG 2
n01641577/n01641577_7855.JPEG 2
n01641577/n01641577_7857.JPEG 2
n01641577/n01641577_7883.JPEG 2
n01641577/n01641577_7888.JPEG 2
n01641577/n01641577_7905.JPEG 2
n01641577/n01641577_7915.JPEG 2
n01641577/n01641577_7933.JPEG 2
n01641577/n01641577_7937.JPEG 2
n01641577/n01641577_7942.JPEG 2
n01641577/n01641577_7966.JPEG 2
n01641577/n01641577_7973.JPEG 2
n01641577/n01641577_7991.JPEG 2
n01641577/n01641577_8008.JPEG 2
n01641577/n01641577_8018.JPEG 2
n01641577/n01641577_8029.JPEG 2
n01641577/n01641577_803.JPEG 2
n01641577/n01641577_804.JPEG 2
n01641577/n01641577_805.JPEG 2
n01641577/n01641577_8055.JPEG 2
n01641577/n01641577_8091.JPEG 2
n01641577/n01641577_811.JPEG 2
n01641577/n01641577_8111.JPEG 2
n01641577/n01641577_8114.JPEG 2
n01641577/n01641577_8115.JPEG 2
n01641577/n01641577_813.JPEG 2
n01641577/n01641577_8131.JPEG 2
n01641577/n01641577_815.JPEG 2
n01641577/n01641577_8170.JPEG 2
n01641577/n01641577_8199.JPEG 2
n01641577/n01641577_8204.JPEG 2
n01641577/n01641577_8217.JPEG 2
n01641577/n01641577_8220.JPEG 2
n01641577/n01641577_8231.JPEG 2
n01641577/n01641577_8239.JPEG 2
n01641577/n01641577_824.JPEG 2
n01641577/n01641577_8243.JPEG 2
n01641577/n01641577_8252.JPEG 2
n01641577/n01641577_826.JPEG 2
n01641577/n01641577_8266.JPEG 2
n01641577/n01641577_8267.JPEG 2
n01641577/n01641577_8271.JPEG 2
n01641577/n01641577_8280.JPEG 2
n01641577/n01641577_8291.JPEG 2
n01641577/n01641577_8296.JPEG 2
n01641577/n01641577_8302.JPEG 2
n01641577/n01641577_8304.JPEG 2
n01641577/n01641577_8314.JPEG 2
n01641577/n01641577_832.JPEG 2
n01641577/n01641577_8322.JPEG 2
n01641577/n01641577_8334.JPEG 2
n01641577/n01641577_8344.JPEG 2
n01641577/n01641577_8357.JPEG 2
n01641577/n01641577_8365.JPEG 2
n01641577/n01641577_8379.JPEG 2
n01641577/n01641577_838.JPEG 2
n01641577/n01641577_8384.JPEG 2
n01641577/n01641577_8385.JPEG 2
n01641577/n01641577_8403.JPEG 2
n01641577/n01641577_8413.JPEG 2
n01641577/n01641577_8428.JPEG 2
n01641577/n01641577_8433.JPEG 2
n01641577/n01641577_8437.JPEG 2
n01641577/n01641577_8439.JPEG 2
n01641577/n01641577_848.JPEG 2
n01641577/n01641577_8485.JPEG 2
n01641577/n01641577_8521.JPEG 2
n01641577/n01641577_8541.JPEG 2
n01641577/n01641577_8543.JPEG 2
n01641577/n01641577_8556.JPEG 2
n01641577/n01641577_8562.JPEG 2
n01641577/n01641577_8579.JPEG 2
n01641577/n01641577_8595.JPEG 2
n01641577/n01641577_8602.JPEG 2
n01641577/n01641577_8612.JPEG 2
n01641577/n01641577_8625.JPEG 2
n01641577/n01641577_8628.JPEG 2
n01641577/n01641577_8636.JPEG 2
n01641577/n01641577_8646.JPEG 2
n01641577/n01641577_8648.JPEG 2
n01641577/n01641577_865.JPEG 2
n01641577/n01641577_8663.JPEG 2
n01641577/n01641577_867.JPEG 2
n01641577/n01641577_8681.JPEG 2
n01641577/n01641577_8690.JPEG 2
n01641577/n01641577_8693.JPEG 2
n01641577/n01641577_8715.JPEG 2
n01641577/n01641577_8732.JPEG 2
n01641577/n01641577_8736.JPEG 2
n01641577/n01641577_8772.JPEG 2
n01641577/n01641577_8774.JPEG 2
n01641577/n01641577_8785.JPEG 2
n01641577/n01641577_8786.JPEG 2
n01641577/n01641577_8788.JPEG 2
n01641577/n01641577_8796.JPEG 2
n01641577/n01641577_8818.JPEG 2
n01641577/n01641577_8830.JPEG 2
n01641577/n01641577_8834.JPEG 2
n01641577/n01641577_8839.JPEG 2
n01641577/n01641577_8856.JPEG 2
n01641577/n01641577_8859.JPEG 2
n01641577/n01641577_8861.JPEG 2
n01641577/n01641577_887.JPEG 2
n01641577/n01641577_8904.JPEG 2
n01641577/n01641577_8916.JPEG 2
n01641577/n01641577_8944.JPEG 2
n01641577/n01641577_8945.JPEG 2
n01641577/n01641577_8953.JPEG 2
n01641577/n01641577_8979.JPEG 2
n01641577/n01641577_9.JPEG 2
n01641577/n01641577_900.JPEG 2
n01641577/n01641577_9000.JPEG 2
n01641577/n01641577_9007.JPEG 2
n01641577/n01641577_9012.JPEG 2
n01641577/n01641577_9039.JPEG 2
n01641577/n01641577_9056.JPEG 2
n01641577/n01641577_909.JPEG 2
n01641577/n01641577_9095.JPEG 2
n01641577/n01641577_9108.JPEG 2
n01641577/n01641577_9113.JPEG 2
n01641577/n01641577_9122.JPEG 2
n01641577/n01641577_9137.JPEG 2
n01641577/n01641577_9140.JPEG 2
n01641577/n01641577_9147.JPEG 2
n01641577/n01641577_9157.JPEG 2
n01641577/n01641577_921.JPEG 2
n01641577/n01641577_9227.JPEG 2
n01641577/n01641577_9228.JPEG 2
n01641577/n01641577_9266.JPEG 2
n01641577/n01641577_9269.JPEG 2
n01641577/n01641577_9272.JPEG 2
n01641577/n01641577_9279.JPEG 2
n01641577/n01641577_9302.JPEG 2
n01641577/n01641577_9306.JPEG 2
n01641577/n01641577_934.JPEG 2
n01641577/n01641577_935.JPEG 2
n01641577/n01641577_9390.JPEG 2
n01641577/n01641577_940.JPEG 2
n01641577/n01641577_9416.JPEG 2
n01641577/n01641577_9434.JPEG 2
n01641577/n01641577_9446.JPEG 2
n01641577/n01641577_9448.JPEG 2
n01641577/n01641577_946.JPEG 2
n01641577/n01641577_9463.JPEG 2
n01641577/n01641577_9474.JPEG 2
n01641577/n01641577_9475.JPEG 2
n01641577/n01641577_9483.JPEG 2
n01641577/n01641577_9491.JPEG 2
n01641577/n01641577_950.JPEG 2
n01641577/n01641577_9515.JPEG 2
n01641577/n01641577_952.JPEG 2
n01641577/n01641577_9539.JPEG 2
n01641577/n01641577_9546.JPEG 2
n01641577/n01641577_9559.JPEG 2
n01641577/n01641577_9616.JPEG 2
n01641577/n01641577_9623.JPEG 2
n01641577/n01641577_9639.JPEG 2
n01641577/n01641577_9664.JPEG 2
n01641577/n01641577_9700.JPEG 2
n01641577/n01641577_9709.JPEG 2
n01641577/n01641577_9760.JPEG 2
n01641577/n01641577_9781.JPEG 2
n01641577/n01641577_9818.JPEG 2
n01641577/n01641577_9860.JPEG 2
n01641577/n01641577_9877.JPEG 2
n01641577/n01641577_9882.JPEG 2
n01641577/n01641577_9893.JPEG 2
n01641577/n01641577_9906.JPEG 2
n01641577/n01641577_9912.JPEG 2
n01641577/n01641577_9915.JPEG 2
n01641577/n01641577_9927.JPEG 2
n01641577/n01641577_9935.JPEG 2
n01641577/n01641577_9951.JPEG 2
n01641577/n01641577_9955.JPEG 2
n01641577/n01641577_996.JPEG 2
n01641577/n01641577_9962.JPEG 2
n01641577/n01641577_9972.JPEG 2
n01641577/n01641577_9974.JPEG 2
n01641577/n01641577_9976.JPEG 2
n01641577/n01641577_9978.JPEG 2
n01641577/n01641577_9979.JPEG 2
n01641577/n01641577_9999.JPEG 2
n01644373/n01644373_1000.JPEG 2
n01644373/n01644373_10002.JPEG 2
n01644373/n01644373_10011.JPEG 2
n01644373/n01644373_10022.JPEG 2
n01644373/n01644373_1003.JPEG 2
n01644373/n01644373_10052.JPEG 2
n01644373/n01644373_10059.JPEG 2
n01644373/n01644373_10060.JPEG 2
n01644373/n01644373_10061.JPEG 2
n01644373/n01644373_10062.JPEG 2
n01644373/n01644373_10068.JPEG 2
n01644373/n01644373_1007.JPEG 2
n01644373/n01644373_10072.JPEG 2
n01644373/n01644373_10075.JPEG 2
n01644373/n01644373_10083.JPEG 2
n01644373/n01644373_10084.JPEG 2
n01644373/n01644373_10088.JPEG 2
n01644373/n01644373_10092.JPEG 2
n01644373/n01644373_10101.JPEG 2
n01644373/n01644373_10106.JPEG 2
n01644373/n01644373_10111.JPEG 2
n01644373/n01644373_10112.JPEG 2
n01644373/n01644373_10115.JPEG 2
n01644373/n01644373_10125.JPEG 2
n01644373/n01644373_10129.JPEG 2
n01644373/n01644373_10130.JPEG 2
n01644373/n01644373_10133.JPEG 2
n01644373/n01644373_1014.JPEG 2
n01644373/n01644373_10149.JPEG 2
n01644373/n01644373_10153.JPEG 2
n01644373/n01644373_10158.JPEG 2
n01644373/n01644373_10162.JPEG 2
n01644373/n01644373_1018.JPEG 2
n01644373/n01644373_10227.JPEG 2
n01644373/n01644373_10258.JPEG 2
n01644373/n01644373_10259.JPEG 2
n01644373/n01644373_1026.JPEG 2
n01644373/n01644373_1027.JPEG 2
n01644373/n01644373_10282.JPEG 2
n01644373/n01644373_10296.JPEG 2
n01644373/n01644373_10297.JPEG 2
n01644373/n01644373_10309.JPEG 2
n01644373/n01644373_10324.JPEG 2
n01644373/n01644373_10331.JPEG 2
n01644373/n01644373_10334.JPEG 2
n01644373/n01644373_10350.JPEG 2
n01644373/n01644373_10363.JPEG 2
n01644373/n01644373_10366.JPEG 2
n01644373/n01644373_1037.JPEG 2
n01644373/n01644373_10375.JPEG 2
n01644373/n01644373_10453.JPEG 2
n01644373/n01644373_1046.JPEG 2
n01644373/n01644373_10469.JPEG 2
n01644373/n01644373_10484.JPEG 2
n01644373/n01644373_10490.JPEG 2
n01644373/n01644373_10492.JPEG 2
n01644373/n01644373_10507.JPEG 2
n01644373/n01644373_10515.JPEG 2
n01644373/n01644373_10523.JPEG 2
n01644373/n01644373_10528.JPEG 2
n01644373/n01644373_10537.JPEG 2
n01644373/n01644373_10561.JPEG 2
n01644373/n01644373_1057.JPEG 2
n01644373/n01644373_10570.JPEG 2
n01644373/n01644373_10573.JPEG 2
n01644373/n01644373_10575.JPEG 2
n01644373/n01644373_10576.JPEG 2
n01644373/n01644373_10586.JPEG 2
n01644373/n01644373_10592.JPEG 2
n01644373/n01644373_106.JPEG 2
n01644373/n01644373_10610.JPEG 2
n01644373/n01644373_10613.JPEG 2
n01644373/n01644373_10617.JPEG 2
n01644373/n01644373_10620.JPEG 2
n01644373/n01644373_10622.JPEG 2
n01644373/n01644373_10627.JPEG 2
n01644373/n01644373_10635.JPEG 2
n01644373/n01644373_10643.JPEG 2
n01644373/n01644373_10685.JPEG 2
n01644373/n01644373_10686.JPEG 2
n01644373/n01644373_10689.JPEG 2
n01644373/n01644373_10711.JPEG 2
n01644373/n01644373_10714.JPEG 2
n01644373/n01644373_10732.JPEG 2
n01644373/n01644373_10750.JPEG 2
n01644373/n01644373_10757.JPEG 2
n01644373/n01644373_10772.JPEG 2
n01644373/n01644373_10795.JPEG 2
n01644373/n01644373_10801.JPEG 2
n01644373/n01644373_10806.JPEG 2
n01644373/n01644373_10807.JPEG 2
n01644373/n01644373_10816.JPEG 2
n01644373/n01644373_1082.JPEG 2
n01644373/n01644373_10826.JPEG 2
n01644373/n01644373_10836.JPEG 2
n01644373/n01644373_10848.JPEG 2
n01644373/n01644373_1086.JPEG 2
n01644373/n01644373_10876.JPEG 2
n01644373/n01644373_10882.JPEG 2
n01644373/n01644373_10893.JPEG 2
n01644373/n01644373_10903.JPEG 2
n01644373/n01644373_10926.JPEG 2
n01644373/n01644373_10937.JPEG 2
n01644373/n01644373_1098.JPEG 2
n01644373/n01644373_11000.JPEG 2
n01644373/n01644373_11006.JPEG 2
n01644373/n01644373_11013.JPEG 2
n01644373/n01644373_11020.JPEG 2
n01644373/n01644373_11022.JPEG 2
n01644373/n01644373_11040.JPEG 2
n01644373/n01644373_1105.JPEG 2
n01644373/n01644373_11054.JPEG 2
n01644373/n01644373_11062.JPEG 2
n01644373/n01644373_11078.JPEG 2
n01644373/n01644373_1108.JPEG 2
n01644373/n01644373_11090.JPEG 2
n01644373/n01644373_11093.JPEG 2
n01644373/n01644373_11121.JPEG 2
n01644373/n01644373_11153.JPEG 2
n01644373/n01644373_11157.JPEG 2
n01644373/n01644373_1116.JPEG 2
n01644373/n01644373_11161.JPEG 2
n01644373/n01644373_11180.JPEG 2
n01644373/n01644373_11188.JPEG 2
n01644373/n01644373_11201.JPEG 2
n01644373/n01644373_11202.JPEG 2
n01644373/n01644373_11204.JPEG 2
n01644373/n01644373_11206.JPEG 2
n01644373/n01644373_11208.JPEG 2
n01644373/n01644373_1122.JPEG 2
n01644373/n01644373_11223.JPEG 2
n01644373/n01644373_11243.JPEG 2
n01644373/n01644373_11271.JPEG 2
n01644373/n01644373_11286.JPEG 2
n01644373/n01644373_11311.JPEG 2
n01644373/n01644373_1132.JPEG 2
n01644373/n01644373_11325.JPEG 2
n01644373/n01644373_11326.JPEG 2
n01644373/n01644373_11332.JPEG 2
n01644373/n01644373_11341.JPEG 2
n01644373/n01644373_11355.JPEG 2
n01644373/n01644373_11364.JPEG 2
n01644373/n01644373_11366.JPEG 2
n01644373/n01644373_11378.JPEG 2
n01644373/n01644373_1138.JPEG 2
n01644373/n01644373_1139.JPEG 2
n01644373/n01644373_11394.JPEG 2
n01644373/n01644373_11395.JPEG 2
n01644373/n01644373_11397.JPEG 2
n01644373/n01644373_11414.JPEG 2
n01644373/n01644373_11424.JPEG 2
n01644373/n01644373_11474.JPEG 2
n01644373/n01644373_1148.JPEG 2
n01644373/n01644373_11483.JPEG 2
n01644373/n01644373_11488.JPEG 2
n01644373/n01644373_11492.JPEG 2
n01644373/n01644373_11514.JPEG 2
n01644373/n01644373_11524.JPEG 2
n01644373/n01644373_11528.JPEG 2
n01644373/n01644373_11553.JPEG 2
n01644373/n01644373_11576.JPEG 2
n01644373/n01644373_11590.JPEG 2
n01644373/n01644373_11592.JPEG 2
n01644373/n01644373_11604.JPEG 2
n01644373/n01644373_11631.JPEG 2
n01644373/n01644373_11643.JPEG 2
n01644373/n01644373_11668.JPEG 2
n01644373/n01644373_11710.JPEG 2
n01644373/n01644373_1175.JPEG 2
n01644373/n01644373_11751.JPEG 2
n01644373/n01644373_11769.JPEG 2
n01644373/n01644373_11787.JPEG 2
n01644373/n01644373_11851.JPEG 2
n01644373/n01644373_11863.JPEG 2
n01644373/n01644373_1190.JPEG 2
n01644373/n01644373_1191.JPEG 2
n01644373/n01644373_11912.JPEG 2
n01644373/n01644373_11919.JPEG 2
n01644373/n01644373_11962.JPEG 2
n01644373/n01644373_11986.JPEG 2
n01644373/n01644373_1203.JPEG 2
n01644373/n01644373_12036.JPEG 2
n01644373/n01644373_12049.JPEG 2
n01644373/n01644373_12060.JPEG 2
n01644373/n01644373_12084.JPEG 2
n01644373/n01644373_1210.JPEG 2
n01644373/n01644373_12140.JPEG 2
n01644373/n01644373_12144.JPEG 2
n01644373/n01644373_1219.JPEG 2
n01644373/n01644373_1223.JPEG 2
n01644373/n01644373_12248.JPEG 2
n01644373/n01644373_12325.JPEG 2
n01644373/n01644373_1233.JPEG 2
n01644373/n01644373_1236.JPEG 2
n01644373/n01644373_12434.JPEG 2
n01644373/n01644373_12474.JPEG 2
n01644373/n01644373_12522.JPEG 2
n01644373/n01644373_1253.JPEG 2
n01644373/n01644373_12561.JPEG 2
n01644373/n01644373_12571.JPEG 2
n01644373/n01644373_1261.JPEG 2
n01644373/n01644373_12635.JPEG 2
n01644373/n01644373_12636.JPEG 2
n01644373/n01644373_12664.JPEG 2
n01644373/n01644373_12699.JPEG 2
n01644373/n01644373_12705.JPEG 2
n01644373/n01644373_12803.JPEG 2
n01644373/n01644373_1289.JPEG 2
n01644373/n01644373_12898.JPEG 2
n01644373/n01644373_12904.JPEG 2
n01644373/n01644373_1299.JPEG 2
n01644373/n01644373_1300.JPEG 2
n01644373/n01644373_13012.JPEG 2
n01644373/n01644373_1305.JPEG 2
n01644373/n01644373_13078.JPEG 2
n01644373/n01644373_13090.JPEG 2
n01644373/n01644373_1314.JPEG 2
n01644373/n01644373_13158.JPEG 2
n01644373/n01644373_13186.JPEG 2
n01644373/n01644373_13190.JPEG 2
n01644373/n01644373_13191.JPEG 2
n01644373/n01644373_132.JPEG 2
n01644373/n01644373_13218.JPEG 2
n01644373/n01644373_13226.JPEG 2
n01644373/n01644373_13246.JPEG 2
n01644373/n01644373_13253.JPEG 2
n01644373/n01644373_13265.JPEG 2
n01644373/n01644373_13291.JPEG 2
n01644373/n01644373_13296.JPEG 2
n01644373/n01644373_13305.JPEG 2
n01644373/n01644373_13331.JPEG 2
n01644373/n01644373_1338.JPEG 2
n01644373/n01644373_13386.JPEG 2
n01644373/n01644373_13455.JPEG 2
n01644373/n01644373_13463.JPEG 2
n01644373/n01644373_13466.JPEG 2
n01644373/n01644373_13471.JPEG 2
n01644373/n01644373_13504.JPEG 2
n01644373/n01644373_13526.JPEG 2
n01644373/n01644373_13539.JPEG 2
n01644373/n01644373_13542.JPEG 2
n01644373/n01644373_13575.JPEG 2
n01644373/n01644373_13579.JPEG 2
n01644373/n01644373_13639.JPEG 2
n01644373/n01644373_13655.JPEG 2
n01644373/n01644373_13668.JPEG 2
n01644373/n01644373_13670.JPEG 2
n01644373/n01644373_13675.JPEG 2
n01644373/n01644373_13683.JPEG 2
n01644373/n01644373_13719.JPEG 2
n01644373/n01644373_13732.JPEG 2
n01644373/n01644373_13736.JPEG 2
n01644373/n01644373_13740.JPEG 2
n01644373/n01644373_13763.JPEG 2
n01644373/n01644373_13806.JPEG 2
n01644373/n01644373_13818.JPEG 2
n01644373/n01644373_13828.JPEG 2
n01644373/n01644373_13841.JPEG 2
n01644373/n01644373_13860.JPEG 2
n01644373/n01644373_13866.JPEG 2
n01644373/n01644373_1387.JPEG 2
n01644373/n01644373_1389.JPEG 2
n01644373/n01644373_13890.JPEG 2
n01644373/n01644373_13896.JPEG 2
n01644373/n01644373_13914.JPEG 2
n01644373/n01644373_13919.JPEG 2
n01644373/n01644373_13934.JPEG 2
n01644373/n01644373_13936.JPEG 2
n01644373/n01644373_13954.JPEG 2
n01644373/n01644373_13958.JPEG 2
n01644373/n01644373_1397.JPEG 2
n01644373/n01644373_13975.JPEG 2
n01644373/n01644373_13997.JPEG 2
n01644373/n01644373_14035.JPEG 2
n01644373/n01644373_1404.JPEG 2
n01644373/n01644373_14082.JPEG 2
n01644373/n01644373_14115.JPEG 2
n01644373/n01644373_14186.JPEG 2
n01644373/n01644373_14205.JPEG 2
n01644373/n01644373_14235.JPEG 2
n01644373/n01644373_14260.JPEG 2
n01644373/n01644373_14261.JPEG 2
n01644373/n01644373_1429.JPEG 2
n01644373/n01644373_14321.JPEG 2
n01644373/n01644373_14322.JPEG 2
n01644373/n01644373_1437.JPEG 2
n01644373/n01644373_14378.JPEG 2
n01644373/n01644373_14417.JPEG 2
n01644373/n01644373_14434.JPEG 2
n01644373/n01644373_14436.JPEG 2
n01644373/n01644373_1444.JPEG 2
n01644373/n01644373_14478.JPEG 2
n01644373/n01644373_14491.JPEG 2
n01644373/n01644373_14502.JPEG 2
n01644373/n01644373_14547.JPEG 2
n01644373/n01644373_14583.JPEG 2
n01644373/n01644373_1459.JPEG 2
n01644373/n01644373_14619.JPEG 2
n01644373/n01644373_14622.JPEG 2
n01644373/n01644373_14635.JPEG 2
n01644373/n01644373_14641.JPEG 2
n01644373/n01644373_1465.JPEG 2
n01644373/n01644373_1466.JPEG 2
n01644373/n01644373_1467.JPEG 2
n01644373/n01644373_14702.JPEG 2
n01644373/n01644373_14729.JPEG 2
n01644373/n01644373_14731.JPEG 2
n01644373/n01644373_1474.JPEG 2
n01644373/n01644373_14758.JPEG 2
n01644373/n01644373_1476.JPEG 2
n01644373/n01644373_14784.JPEG 2
n01644373/n01644373_1479.JPEG 2
n01644373/n01644373_14797.JPEG 2
n01644373/n01644373_14806.JPEG 2
n01644373/n01644373_1481.JPEG 2
n01644373/n01644373_14834.JPEG 2
n01644373/n01644373_14921.JPEG 2
n01644373/n01644373_14924.JPEG 2
n01644373/n01644373_14926.JPEG 2
n01644373/n01644373_14947.JPEG 2
n01644373/n01644373_14950.JPEG 2
n01644373/n01644373_1497.JPEG 2
n01644373/n01644373_14970.JPEG 2
n01644373/n01644373_14981.JPEG 2
n01644373/n01644373_14988.JPEG 2
n01644373/n01644373_14989.JPEG 2
n01644373/n01644373_150.JPEG 2
n01644373/n01644373_1500.JPEG 2
n01644373/n01644373_15006.JPEG 2
n01644373/n01644373_1501.JPEG 2
n01644373/n01644373_15011.JPEG 2
n01644373/n01644373_15031.JPEG 2
n01644373/n01644373_15046.JPEG 2
n01644373/n01644373_15059.JPEG 2
n01644373/n01644373_15061.JPEG 2
n01644373/n01644373_15062.JPEG 2
n01644373/n01644373_15072.JPEG 2
n01644373/n01644373_15095.JPEG 2
n01644373/n01644373_15100.JPEG 2
n01644373/n01644373_15104.JPEG 2
n01644373/n01644373_15106.JPEG 2
n01644373/n01644373_15119.JPEG 2
n01644373/n01644373_15127.JPEG 2
n01644373/n01644373_15145.JPEG 2
n01644373/n01644373_1516.JPEG 2
n01644373/n01644373_15170.JPEG 2
n01644373/n01644373_1518.JPEG 2
n01644373/n01644373_15189.JPEG 2
n01644373/n01644373_1519.JPEG 2
n01644373/n01644373_15195.JPEG 2
n01644373/n01644373_15201.JPEG 2
n01644373/n01644373_15206.JPEG 2
n01644373/n01644373_15246.JPEG 2
n01644373/n01644373_15247.JPEG 2
n01644373/n01644373_15257.JPEG 2
n01644373/n01644373_15267.JPEG 2
n01644373/n01644373_15276.JPEG 2
n01644373/n01644373_15278.JPEG 2
n01644373/n01644373_15282.JPEG 2
n01644373/n01644373_1529.JPEG 2
n01644373/n01644373_15294.JPEG 2
n01644373/n01644373_15306.JPEG 2
n01644373/n01644373_15314.JPEG 2
n01644373/n01644373_15326.JPEG 2
n01644373/n01644373_15352.JPEG 2
n01644373/n01644373_15358.JPEG 2
n01644373/n01644373_15359.JPEG 2
n01644373/n01644373_15368.JPEG 2
n01644373/n01644373_15379.JPEG 2
n01644373/n01644373_15387.JPEG 2
n01644373/n01644373_1539.JPEG 2
n01644373/n01644373_15396.JPEG 2
n01644373/n01644373_15398.JPEG 2
n01644373/n01644373_15405.JPEG 2
n01644373/n01644373_15406.JPEG 2
n01644373/n01644373_15417.JPEG 2
n01644373/n01644373_15425.JPEG 2
n01644373/n01644373_15441.JPEG 2
n01644373/n01644373_15474.JPEG 2
n01644373/n01644373_15485.JPEG 2
n01644373/n01644373_15486.JPEG 2
n01644373/n01644373_1549.JPEG 2
n01644373/n01644373_15492.JPEG 2
n01644373/n01644373_1550.JPEG 2
n01644373/n01644373_15510.JPEG 2
n01644373/n01644373_15511.JPEG 2
n01644373/n01644373_15520.JPEG 2
n01644373/n01644373_1553.JPEG 2
n01644373/n01644373_15530.JPEG 2
n01644373/n01644373_15533.JPEG 2
n01644373/n01644373_1554.JPEG 2
n01644373/n01644373_15546.JPEG 2
n01644373/n01644373_15562.JPEG 2
n01644373/n01644373_15591.JPEG 2
n01644373/n01644373_15593.JPEG 2
n01644373/n01644373_15597.JPEG 2
n01644373/n01644373_15598.JPEG 2
n01644373/n01644373_15604.JPEG 2
n01644373/n01644373_15608.JPEG 2
n01644373/n01644373_15612.JPEG 2
n01644373/n01644373_15619.JPEG 2
n01644373/n01644373_15621.JPEG 2
n01644373/n01644373_1563.JPEG 2
n01644373/n01644373_15630.JPEG 2
n01644373/n01644373_15648.JPEG 2
n01644373/n01644373_15663.JPEG 2
n01644373/n01644373_15672.JPEG 2
n01644373/n01644373_15691.JPEG 2
n01644373/n01644373_15711.JPEG 2
n01644373/n01644373_15722.JPEG 2
n01644373/n01644373_15733.JPEG 2
n01644373/n01644373_15750.JPEG 2
n01644373/n01644373_15770.JPEG 2
n01644373/n01644373_15772.JPEG 2
n01644373/n01644373_15781.JPEG 2
n01644373/n01644373_15782.JPEG 2
n01644373/n01644373_15797.JPEG 2
n01644373/n01644373_15799.JPEG 2
n01644373/n01644373_15810.JPEG 2
n01644373/n01644373_15818.JPEG 2
n01644373/n01644373_1582.JPEG 2
n01644373/n01644373_15822.JPEG 2
n01644373/n01644373_15828.JPEG 2
n01644373/n01644373_15839.JPEG 2
n01644373/n01644373_15842.JPEG 2
n01644373/n01644373_15847.JPEG 2
n01644373/n01644373_15879.JPEG 2
n01644373/n01644373_15893.JPEG 2
n01644373/n01644373_15916.JPEG 2
n01644373/n01644373_15955.JPEG 2
n01644373/n01644373_16042.JPEG 2
n01644373/n01644373_16054.JPEG 2
n01644373/n01644373_16073.JPEG 2
n01644373/n01644373_161.JPEG 2
n01644373/n01644373_1618.JPEG 2
n01644373/n01644373_16195.JPEG 2
n01644373/n01644373_1620.JPEG 2
n01644373/n01644373_16234.JPEG 2
n01644373/n01644373_16240.JPEG 2
n01644373/n01644373_16265.JPEG 2
n01644373/n01644373_16301.JPEG 2
n01644373/n01644373_16363.JPEG 2
n01644373/n01644373_1638.JPEG 2
n01644373/n01644373_1642.JPEG 2
n01644373/n01644373_16440.JPEG 2
n01644373/n01644373_16479.JPEG 2
n01644373/n01644373_16501.JPEG 2
n01644373/n01644373_1651.JPEG 2
n01644373/n01644373_16516.JPEG 2
n01644373/n01644373_16541.JPEG 2
n01644373/n01644373_16546.JPEG 2
n01644373/n01644373_1659.JPEG 2
n01644373/n01644373_16597.JPEG 2
n01644373/n01644373_16610.JPEG 2
n01644373/n01644373_16621.JPEG 2
n01644373/n01644373_16630.JPEG 2
n01644373/n01644373_16696.JPEG 2
n01644373/n01644373_167.JPEG 2
n01644373/n01644373_16710.JPEG 2
n01644373/n01644373_16741.JPEG 2
n01644373/n01644373_1681.JPEG 2
n01644373/n01644373_16811.JPEG 2
n01644373/n01644373_16837.JPEG 2
n01644373/n01644373_16856.JPEG 2
n01644373/n01644373_16902.JPEG 2
n01644373/n01644373_16906.JPEG 2
n01644373/n01644373_1693.JPEG 2
n01644373/n01644373_16953.JPEG 2
n01644373/n01644373_1696.JPEG 2
n01644373/n01644373_16966.JPEG 2
n01644373/n01644373_16968.JPEG 2
n01644373/n01644373_17023.JPEG 2
n01644373/n01644373_17054.JPEG 2
n01644373/n01644373_17107.JPEG 2
n01644373/n01644373_17157.JPEG 2
n01644373/n01644373_17160.JPEG 2
n01644373/n01644373_1717.JPEG 2
n01644373/n01644373_1719.JPEG 2
n01644373/n01644373_172.JPEG 2
n01644373/n01644373_1720.JPEG 2
n01644373/n01644373_17225.JPEG 2
n01644373/n01644373_17330.JPEG 2
n01644373/n01644373_17332.JPEG 2
n01644373/n01644373_17367.JPEG 2
n01644373/n01644373_1739.JPEG 2
n01644373/n01644373_1750.JPEG 2
n01644373/n01644373_1763.JPEG 2
n01644373/n01644373_1764.JPEG 2
n01644373/n01644373_1776.JPEG 2
n01644373/n01644373_17838.JPEG 2
n01644373/n01644373_1790.JPEG 2
n01644373/n01644373_1791.JPEG 2
n01644373/n01644373_1799.JPEG 2
n01644373/n01644373_1828.JPEG 2
n01644373/n01644373_1834.JPEG 2
n01644373/n01644373_18380.JPEG 2
n01644373/n01644373_184.JPEG 2
n01644373/n01644373_18479.JPEG 2
n01644373/n01644373_1856.JPEG 2
n01644373/n01644373_18617.JPEG 2
n01644373/n01644373_1866.JPEG 2
n01644373/n01644373_18660.JPEG 2
n01644373/n01644373_18772.JPEG 2
n01644373/n01644373_1882.JPEG 2
n01644373/n01644373_18827.JPEG 2
n01644373/n01644373_1884.JPEG 2
n01644373/n01644373_18851.JPEG 2
n01644373/n01644373_1886.JPEG 2
n01644373/n01644373_1890.JPEG 2
n01644373/n01644373_18968.JPEG 2
n01644373/n01644373_19016.JPEG 2
n01644373/n01644373_1904.JPEG 2
n01644373/n01644373_19135.JPEG 2
n01644373/n01644373_19318.JPEG 2
n01644373/n01644373_1934.JPEG 2
n01644373/n01644373_1938.JPEG 2
n01644373/n01644373_19481.JPEG 2
n01644373/n01644373_195.JPEG 2
n01644373/n01644373_19524.JPEG 2
n01644373/n01644373_19558.JPEG 2
n01644373/n01644373_1965.JPEG 2
n01644373/n01644373_1976.JPEG 2
n01644373/n01644373_19764.JPEG 2
n01644373/n01644373_19766.JPEG 2
n01644373/n01644373_1979.JPEG 2
n01644373/n01644373_1987.JPEG 2
n01644373/n01644373_2003.JPEG 2
n01644373/n01644373_2026.JPEG 2
n01644373/n01644373_2033.JPEG 2
n01644373/n01644373_2035.JPEG 2
n01644373/n01644373_2077.JPEG 2
n01644373/n01644373_2111.JPEG 2
n01644373/n01644373_2133.JPEG 2
n01644373/n01644373_2138.JPEG 2
n01644373/n01644373_214.JPEG 2
n01644373/n01644373_2145.JPEG 2
n01644373/n01644373_2151.JPEG 2
n01644373/n01644373_2158.JPEG 2
n01644373/n01644373_2165.JPEG 2
n01644373/n01644373_2170.JPEG 2
n01644373/n01644373_2183.JPEG 2
n01644373/n01644373_2225.JPEG 2
n01644373/n01644373_2245.JPEG 2
n01644373/n01644373_225.JPEG 2
n01644373/n01644373_2253.JPEG 2
n01644373/n01644373_2254.JPEG 2
n01644373/n01644373_2274.JPEG 2
n01644373/n01644373_2278.JPEG 2
n01644373/n01644373_2295.JPEG 2
n01644373/n01644373_2299.JPEG 2
n01644373/n01644373_2312.JPEG 2
n01644373/n01644373_2317.JPEG 2
n01644373/n01644373_2321.JPEG 2
n01644373/n01644373_2330.JPEG 2
n01644373/n01644373_2339.JPEG 2
n01644373/n01644373_236.JPEG 2
n01644373/n01644373_2362.JPEG 2
n01644373/n01644373_2373.JPEG 2
n01644373/n01644373_2377.JPEG 2
n01644373/n01644373_2382.JPEG 2
n01644373/n01644373_239.JPEG 2
n01644373/n01644373_24.JPEG 2
n01644373/n01644373_2428.JPEG 2
n01644373/n01644373_245.JPEG 2
n01644373/n01644373_2461.JPEG 2
n01644373/n01644373_2468.JPEG 2
n01644373/n01644373_2473.JPEG 2
n01644373/n01644373_2479.JPEG 2
n01644373/n01644373_2485.JPEG 2
n01644373/n01644373_2496.JPEG 2
n01644373/n01644373_2503.JPEG 2
n01644373/n01644373_2508.JPEG 2
n01644373/n01644373_2513.JPEG 2
n01644373/n01644373_2523.JPEG 2
n01644373/n01644373_2524.JPEG 2
n01644373/n01644373_2547.JPEG 2
n01644373/n01644373_2548.JPEG 2
n01644373/n01644373_2549.JPEG 2
n01644373/n01644373_2550.JPEG 2
n01644373/n01644373_2553.JPEG 2
n01644373/n01644373_2578.JPEG 2
n01644373/n01644373_2582.JPEG 2
n01644373/n01644373_2590.JPEG 2
n01644373/n01644373_2594.JPEG 2
n01644373/n01644373_2602.JPEG 2
n01644373/n01644373_2617.JPEG 2
n01644373/n01644373_2619.JPEG 2
n01644373/n01644373_2621.JPEG 2
n01644373/n01644373_2626.JPEG 2
n01644373/n01644373_263.JPEG 2
n01644373/n01644373_2638.JPEG 2
n01644373/n01644373_2644.JPEG 2
n01644373/n01644373_2656.JPEG 2
n01644373/n01644373_2657.JPEG 2
n01644373/n01644373_2658.JPEG 2
n01644373/n01644373_2661.JPEG 2
n01644373/n01644373_2682.JPEG 2
n01644373/n01644373_270.JPEG 2
n01644373/n01644373_2704.JPEG 2
n01644373/n01644373_2709.JPEG 2
n01644373/n01644373_2711.JPEG 2
n01644373/n01644373_2730.JPEG 2
n01644373/n01644373_2732.JPEG 2
n01644373/n01644373_2741.JPEG 2
n01644373/n01644373_2748.JPEG 2
n01644373/n01644373_275.JPEG 2
n01644373/n01644373_2750.JPEG 2
n01644373/n01644373_2754.JPEG 2
n01644373/n01644373_2758.JPEG 2
n01644373/n01644373_2762.JPEG 2
n01644373/n01644373_2763.JPEG 2
n01644373/n01644373_2769.JPEG 2
n01644373/n01644373_2773.JPEG 2
n01644373/n01644373_2784.JPEG 2
n01644373/n01644373_2787.JPEG 2
n01644373/n01644373_2788.JPEG 2
n01644373/n01644373_2825.JPEG 2
n01644373/n01644373_2826.JPEG 2
n01644373/n01644373_2836.JPEG 2
n01644373/n01644373_2839.JPEG 2
n01644373/n01644373_2847.JPEG 2
n01644373/n01644373_2863.JPEG 2
n01644373/n01644373_2876.JPEG 2
n01644373/n01644373_2878.JPEG 2
n01644373/n01644373_2896.JPEG 2
n01644373/n01644373_2898.JPEG 2
n01644373/n01644373_2900.JPEG 2
n01644373/n01644373_2902.JPEG 2
n01644373/n01644373_2922.JPEG 2
n01644373/n01644373_2934.JPEG 2
n01644373/n01644373_2938.JPEG 2
n01644373/n01644373_2950.JPEG 2
n01644373/n01644373_2962.JPEG 2
n01644373/n01644373_2963.JPEG 2
n01644373/n01644373_2967.JPEG 2
n01644373/n01644373_2973.JPEG 2
n01644373/n01644373_2974.JPEG 2
n01644373/n01644373_2998.JPEG 2
n01644373/n01644373_3019.JPEG 2
n01644373/n01644373_3037.JPEG 2
n01644373/n01644373_3042.JPEG 2
n01644373/n01644373_3043.JPEG 2
n01644373/n01644373_3044.JPEG 2
n01644373/n01644373_3054.JPEG 2
n01644373/n01644373_3089.JPEG 2
n01644373/n01644373_3090.JPEG 2
n01644373/n01644373_31.JPEG 2
n01644373/n01644373_3100.JPEG 2
n01644373/n01644373_3114.JPEG 2
n01644373/n01644373_3120.JPEG 2
n01644373/n01644373_3134.JPEG 2
n01644373/n01644373_3162.JPEG 2
n01644373/n01644373_3180.JPEG 2
n01644373/n01644373_319.JPEG 2
n01644373/n01644373_320.JPEG 2
n01644373/n01644373_3216.JPEG 2
n01644373/n01644373_3226.JPEG 2
n01644373/n01644373_3244.JPEG 2
n01644373/n01644373_3255.JPEG 2
n01644373/n01644373_3260.JPEG 2
n01644373/n01644373_328.JPEG 2
n01644373/n01644373_33.JPEG 2
n01644373/n01644373_3303.JPEG 2
n01644373/n01644373_331.JPEG 2
n01644373/n01644373_3319.JPEG 2
n01644373/n01644373_3343.JPEG 2
n01644373/n01644373_3346.JPEG 2
n01644373/n01644373_3381.JPEG 2
n01644373/n01644373_3399.JPEG 2
n01644373/n01644373_3405.JPEG 2
n01644373/n01644373_3408.JPEG 2
n01644373/n01644373_3436.JPEG 2
n01644373/n01644373_3445.JPEG 2
n01644373/n01644373_3450.JPEG 2
n01644373/n01644373_3454.JPEG 2
n01644373/n01644373_3466.JPEG 2
n01644373/n01644373_3471.JPEG 2
n01644373/n01644373_3474.JPEG 2
n01644373/n01644373_3475.JPEG 2
n01644373/n01644373_3476.JPEG 2
n01644373/n01644373_3486.JPEG 2
n01644373/n01644373_3521.JPEG 2
n01644373/n01644373_3522.JPEG 2
n01644373/n01644373_3528.JPEG 2
n01644373/n01644373_3536.JPEG 2
n01644373/n01644373_3539.JPEG 2
n01644373/n01644373_3540.JPEG 2
n01644373/n01644373_3592.JPEG 2
n01644373/n01644373_3608.JPEG 2
n01644373/n01644373_361.JPEG 2
n01644373/n01644373_3619.JPEG 2
n01644373/n01644373_363.JPEG 2
n01644373/n01644373_3635.JPEG 2
n01644373/n01644373_3651.JPEG 2
n01644373/n01644373_3659.JPEG 2
n01644373/n01644373_3669.JPEG 2
n01644373/n01644373_3702.JPEG 2
n01644373/n01644373_3703.JPEG 2
n01644373/n01644373_3705.JPEG 2
n01644373/n01644373_3713.JPEG 2
n01644373/n01644373_3730.JPEG 2
n01644373/n01644373_375.JPEG 2
n01644373/n01644373_3754.JPEG 2
n01644373/n01644373_3778.JPEG 2
n01644373/n01644373_3789.JPEG 2
n01644373/n01644373_3791.JPEG 2
n01644373/n01644373_3796.JPEG 2
n01644373/n01644373_3801.JPEG 2
n01644373/n01644373_3804.JPEG 2
n01644373/n01644373_3817.JPEG 2
n01644373/n01644373_3825.JPEG 2
n01644373/n01644373_3830.JPEG 2
n01644373/n01644373_3838.JPEG 2
n01644373/n01644373_3840.JPEG 2
n01644373/n01644373_3848.JPEG 2
n01644373/n01644373_3864.JPEG 2
n01644373/n01644373_3865.JPEG 2
n01644373/n01644373_3869.JPEG 2
n01644373/n01644373_3879.JPEG 2
n01644373/n01644373_3916.JPEG 2
n01644373/n01644373_3944.JPEG 2
n01644373/n01644373_3946.JPEG 2
n01644373/n01644373_395.JPEG 2
n01644373/n01644373_3950.JPEG 2
n01644373/n01644373_396.JPEG 2
n01644373/n01644373_3961.JPEG 2
n01644373/n01644373_3962.JPEG 2
n01644373/n01644373_3970.JPEG 2
n01644373/n01644373_3977.JPEG 2
n01644373/n01644373_3980.JPEG 2
n01644373/n01644373_3982.JPEG 2
n01644373/n01644373_3986.JPEG 2
n01644373/n01644373_4011.JPEG 2
n01644373/n01644373_4014.JPEG 2
n01644373/n01644373_4017.JPEG 2
n01644373/n01644373_4024.JPEG 2
n01644373/n01644373_4038.JPEG 2
n01644373/n01644373_404.JPEG 2
n01644373/n01644373_4062.JPEG 2
n01644373/n01644373_4072.JPEG 2
n01644373/n01644373_4075.JPEG 2
n01644373/n01644373_4080.JPEG 2
n01644373/n01644373_4097.JPEG 2
n01644373/n01644373_4102.JPEG 2
n01644373/n01644373_4114.JPEG 2
n01644373/n01644373_4152.JPEG 2
n01644373/n01644373_4175.JPEG 2
n01644373/n01644373_421.JPEG 2
n01644373/n01644373_422.JPEG 2
n01644373/n01644373_4222.JPEG 2
n01644373/n01644373_4242.JPEG 2
n01644373/n01644373_4250.JPEG 2
n01644373/n01644373_426.JPEG 2
n01644373/n01644373_4269.JPEG 2
n01644373/n01644373_4270.JPEG 2
n01644373/n01644373_4281.JPEG 2
n01644373/n01644373_4292.JPEG 2
n01644373/n01644373_4296.JPEG 2
n01644373/n01644373_4298.JPEG 2
n01644373/n01644373_43.JPEG 2
n01644373/n01644373_430.JPEG 2
n01644373/n01644373_4302.JPEG 2
n01644373/n01644373_4321.JPEG 2
n01644373/n01644373_4331.JPEG 2
n01644373/n01644373_4337.JPEG 2
n01644373/n01644373_4340.JPEG 2
n01644373/n01644373_4355.JPEG 2
n01644373/n01644373_4356.JPEG 2
n01644373/n01644373_4360.JPEG 2
n01644373/n01644373_4361.JPEG 2
n01644373/n01644373_4388.JPEG 2
n01644373/n01644373_4391.JPEG 2
n01644373/n01644373_4404.JPEG 2
n01644373/n01644373_4414.JPEG 2
n01644373/n01644373_4420.JPEG 2
n01644373/n01644373_4424.JPEG 2
n01644373/n01644373_4425.JPEG 2
n01644373/n01644373_4428.JPEG 2
n01644373/n01644373_4443.JPEG 2
n01644373/n01644373_4445.JPEG 2
n01644373/n01644373_445.JPEG 2
n01644373/n01644373_4456.JPEG 2
n01644373/n01644373_4459.JPEG 2
n01644373/n01644373_4460.JPEG 2
n01644373/n01644373_4463.JPEG 2
n01644373/n01644373_4468.JPEG 2
n01644373/n01644373_4476.JPEG 2
n01644373/n01644373_4482.JPEG 2
n01644373/n01644373_4488.JPEG 2
n01644373/n01644373_4498.JPEG 2
n01644373/n01644373_4502.JPEG 2
n01644373/n01644373_4523.JPEG 2
n01644373/n01644373_4529.JPEG 2
n01644373/n01644373_453.JPEG 2
n01644373/n01644373_4530.JPEG 2
n01644373/n01644373_4548.JPEG 2
n01644373/n01644373_4561.JPEG 2
n01644373/n01644373_4575.JPEG 2
n01644373/n01644373_4576.JPEG 2
n01644373/n01644373_4585.JPEG 2
n01644373/n01644373_4586.JPEG 2
n01644373/n01644373_4617.JPEG 2
n01644373/n01644373_4618.JPEG 2
n01644373/n01644373_4638.JPEG 2
n01644373/n01644373_4645.JPEG 2
n01644373/n01644373_4646.JPEG 2
n01644373/n01644373_4648.JPEG 2
n01644373/n01644373_4660.JPEG 2
n01644373/n01644373_4661.JPEG 2
n01644373/n01644373_467.JPEG 2
n01644373/n01644373_4697.JPEG 2
n01644373/n01644373_4698.JPEG 2
n01644373/n01644373_4706.JPEG 2
n01644373/n01644373_4711.JPEG 2
n01644373/n01644373_4713.JPEG 2
n01644373/n01644373_4721.JPEG 2
n01644373/n01644373_4725.JPEG 2
n01644373/n01644373_4745.JPEG 2
n01644373/n01644373_4752.JPEG 2
n01644373/n01644373_4764.JPEG 2
n01644373/n01644373_4774.JPEG 2
n01644373/n01644373_4835.JPEG 2
n01644373/n01644373_4844.JPEG 2
n01644373/n01644373_4849.JPEG 2
n01644373/n01644373_4854.JPEG 2
n01644373/n01644373_486.JPEG 2
n01644373/n01644373_4869.JPEG 2
n01644373/n01644373_4870.JPEG 2
n01644373/n01644373_4874.JPEG 2
n01644373/n01644373_4882.JPEG 2
n01644373/n01644373_4889.JPEG 2
n01644373/n01644373_4896.JPEG 2
n01644373/n01644373_4910.JPEG 2
n01644373/n01644373_4918.JPEG 2
n01644373/n01644373_496.JPEG 2
n01644373/n01644373_4967.JPEG 2
n01644373/n01644373_5005.JPEG 2
n01644373/n01644373_5031.JPEG 2
n01644373/n01644373_5035.JPEG 2
n01644373/n01644373_5036.JPEG 2
n01644373/n01644373_5041.JPEG 2
n01644373/n01644373_5058.JPEG 2
n01644373/n01644373_5099.JPEG 2
n01644373/n01644373_5123.JPEG 2
n01644373/n01644373_5126.JPEG 2
n01644373/n01644373_5137.JPEG 2
n01644373/n01644373_5170.JPEG 2
n01644373/n01644373_5186.JPEG 2
n01644373/n01644373_5199.JPEG 2
n01644373/n01644373_5212.JPEG 2
n01644373/n01644373_5231.JPEG 2
n01644373/n01644373_524.JPEG 2
n01644373/n01644373_5244.JPEG 2
n01644373/n01644373_5249.JPEG 2
n01644373/n01644373_5250.JPEG 2
n01644373/n01644373_5259.JPEG 2
n01644373/n01644373_5263.JPEG 2
n01644373/n01644373_5269.JPEG 2
n01644373/n01644373_5278.JPEG 2
n01644373/n01644373_5334.JPEG 2
n01644373/n01644373_5335.JPEG 2
n01644373/n01644373_5363.JPEG 2
n01644373/n01644373_5392.JPEG 2
n01644373/n01644373_5403.JPEG 2
n01644373/n01644373_5420.JPEG 2
n01644373/n01644373_5443.JPEG 2
n01644373/n01644373_5453.JPEG 2
n01644373/n01644373_5458.JPEG 2
n01644373/n01644373_5474.JPEG 2
n01644373/n01644373_5487.JPEG 2
n01644373/n01644373_5505.JPEG 2
n01644373/n01644373_5524.JPEG 2
n01644373/n01644373_5529.JPEG 2
n01644373/n01644373_5531.JPEG 2
n01644373/n01644373_5549.JPEG 2
n01644373/n01644373_5551.JPEG 2
n01644373/n01644373_5553.JPEG 2
n01644373/n01644373_5560.JPEG 2
n01644373/n01644373_559.JPEG 2
n01644373/n01644373_5630.JPEG 2
n01644373/n01644373_5735.JPEG 2
n01644373/n01644373_5753.JPEG 2
n01644373/n01644373_5766.JPEG 2
n01644373/n01644373_577.JPEG 2
n01644373/n01644373_5862.JPEG 2
n01644373/n01644373_5870.JPEG 2
n01644373/n01644373_5882.JPEG 2
n01644373/n01644373_5916.JPEG 2
n01644373/n01644373_593.JPEG 2
n01644373/n01644373_6.JPEG 2
n01644373/n01644373_6030.JPEG 2
n01644373/n01644373_611.JPEG 2
n01644373/n01644373_6134.JPEG 2
n01644373/n01644373_624.JPEG 2
n01644373/n01644373_6376.JPEG 2
n01644373/n01644373_639.JPEG 2
n01644373/n01644373_6412.JPEG 2
n01644373/n01644373_6414.JPEG 2
n01644373/n01644373_6512.JPEG 2
n01644373/n01644373_6543.JPEG 2
n01644373/n01644373_6564.JPEG 2
n01644373/n01644373_6574.JPEG 2
n01644373/n01644373_6594.JPEG 2
n01644373/n01644373_6601.JPEG 2
n01644373/n01644373_6614.JPEG 2
n01644373/n01644373_6616.JPEG 2
n01644373/n01644373_6620.JPEG 2
n01644373/n01644373_6653.JPEG 2
n01644373/n01644373_6654.JPEG 2
n01644373/n01644373_6668.JPEG 2
n01644373/n01644373_6674.JPEG 2
n01644373/n01644373_668.JPEG 2
n01644373/n01644373_6680.JPEG 2
n01644373/n01644373_6706.JPEG 2
n01644373/n01644373_6714.JPEG 2
n01644373/n01644373_6720.JPEG 2
n01644373/n01644373_6735.JPEG 2
n01644373/n01644373_6744.JPEG 2
n01644373/n01644373_675.JPEG 2
n01644373/n01644373_6751.JPEG 2
n01644373/n01644373_6754.JPEG 2
n01644373/n01644373_6765.JPEG 2
n01644373/n01644373_6766.JPEG 2
n01644373/n01644373_6786.JPEG 2
n01644373/n01644373_6789.JPEG 2
n01644373/n01644373_680.JPEG 2
n01644373/n01644373_6805.JPEG 2
n01644373/n01644373_6810.JPEG 2
n01644373/n01644373_6816.JPEG 2
n01644373/n01644373_6819.JPEG 2
n01644373/n01644373_682.JPEG 2
n01644373/n01644373_6820.JPEG 2
n01644373/n01644373_6827.JPEG 2
n01644373/n01644373_683.JPEG 2
n01644373/n01644373_6831.JPEG 2
n01644373/n01644373_6841.JPEG 2
n01644373/n01644373_6847.JPEG 2
n01644373/n01644373_6852.JPEG 2
n01644373/n01644373_6859.JPEG 2
n01644373/n01644373_6862.JPEG 2
n01644373/n01644373_6865.JPEG 2
n01644373/n01644373_6867.JPEG 2
n01644373/n01644373_6878.JPEG 2
n01644373/n01644373_6881.JPEG 2
n01644373/n01644373_6892.JPEG 2
n01644373/n01644373_69.JPEG 2
n01644373/n01644373_6907.JPEG 2
n01644373/n01644373_6919.JPEG 2
n01644373/n01644373_6925.JPEG 2
n01644373/n01644373_6927.JPEG 2
n01644373/n01644373_6933.JPEG 2
n01644373/n01644373_6938.JPEG 2
n01644373/n01644373_6942.JPEG 2
n01644373/n01644373_6945.JPEG 2
n01644373/n01644373_6947.JPEG 2
n01644373/n01644373_6949.JPEG 2
n01644373/n01644373_6953.JPEG 2
n01644373/n01644373_6958.JPEG 2
n01644373/n01644373_6963.JPEG 2
n01644373/n01644373_6964.JPEG 2
n01644373/n01644373_6969.JPEG 2
n01644373/n01644373_6970.JPEG 2
n01644373/n01644373_6987.JPEG 2
n01644373/n01644373_6994.JPEG 2
n01644373/n01644373_701.JPEG 2
n01644373/n01644373_7013.JPEG 2
n01644373/n01644373_7016.JPEG 2
n01644373/n01644373_7019.JPEG 2
n01644373/n01644373_702.JPEG 2
n01644373/n01644373_7023.JPEG 2
n01644373/n01644373_7030.JPEG 2
n01644373/n01644373_7038.JPEG 2
n01644373/n01644373_7043.JPEG 2
n01644373/n01644373_7067.JPEG 2
n01644373/n01644373_7069.JPEG 2
n01644373/n01644373_7071.JPEG 2
n01644373/n01644373_7073.JPEG 2
n01644373/n01644373_7074.JPEG 2
n01644373/n01644373_7080.JPEG 2
n01644373/n01644373_7085.JPEG 2
n01644373/n01644373_7090.JPEG 2
n01644373/n01644373_7091.JPEG 2
n01644373/n01644373_7103.JPEG 2
n01644373/n01644373_7106.JPEG 2
n01644373/n01644373_7107.JPEG 2
n01644373/n01644373_7109.JPEG 2
n01644373/n01644373_7122.JPEG 2
n01644373/n01644373_7128.JPEG 2
n01644373/n01644373_7133.JPEG 2
n01644373/n01644373_7140.JPEG 2
n01644373/n01644373_7146.JPEG 2
n01644373/n01644373_7147.JPEG 2
n01644373/n01644373_7153.JPEG 2
n01644373/n01644373_7157.JPEG 2
n01644373/n01644373_717.JPEG 2
n01644373/n01644373_718.JPEG 2
n01644373/n01644373_7185.JPEG 2
n01644373/n01644373_7189.JPEG 2
n01644373/n01644373_719.JPEG 2
n01644373/n01644373_7195.JPEG 2
n01644373/n01644373_7200.JPEG 2
n01644373/n01644373_7201.JPEG 2
n01644373/n01644373_7208.JPEG 2
n01644373/n01644373_7217.JPEG 2
n01644373/n01644373_7227.JPEG 2
n01644373/n01644373_724.JPEG 2
n01644373/n01644373_7245.JPEG 2
n01644373/n01644373_726.JPEG 2
n01644373/n01644373_7266.JPEG 2
n01644373/n01644373_7274.JPEG 2
n01644373/n01644373_7275.JPEG 2
n01644373/n01644373_7278.JPEG 2
n01644373/n01644373_7288.JPEG 2
n01644373/n01644373_7289.JPEG 2
n01644373/n01644373_7291.JPEG 2
n01644373/n01644373_7295.JPEG 2
n01644373/n01644373_7297.JPEG 2
n01644373/n01644373_7298.JPEG 2
n01644373/n01644373_7299.JPEG 2
n01644373/n01644373_7300.JPEG 2
n01644373/n01644373_7307.JPEG 2
n01644373/n01644373_7309.JPEG 2
n01644373/n01644373_7315.JPEG 2
n01644373/n01644373_7316.JPEG 2
n01644373/n01644373_7328.JPEG 2
n01644373/n01644373_7334.JPEG 2
n01644373/n01644373_7344.JPEG 2
n01644373/n01644373_736.JPEG 2
n01644373/n01644373_7366.JPEG 2
n01644373/n01644373_737.JPEG 2
n01644373/n01644373_738.JPEG 2
n01644373/n01644373_7405.JPEG 2
n01644373/n01644373_7415.JPEG 2
n01644373/n01644373_742.JPEG 2
n01644373/n01644373_7441.JPEG 2
n01644373/n01644373_7453.JPEG 2
n01644373/n01644373_7459.JPEG 2
n01644373/n01644373_7469.JPEG 2
n01644373/n01644373_7485.JPEG 2
n01644373/n01644373_749.JPEG 2
n01644373/n01644373_7492.JPEG 2
n01644373/n01644373_7504.JPEG 2
n01644373/n01644373_7508.JPEG 2
n01644373/n01644373_751.JPEG 2
n01644373/n01644373_7516.JPEG 2
n01644373/n01644373_7522.JPEG 2
n01644373/n01644373_7530.JPEG 2
n01644373/n01644373_7544.JPEG 2
n01644373/n01644373_7551.JPEG 2
n01644373/n01644373_7596.JPEG 2
n01644373/n01644373_7623.JPEG 2
n01644373/n01644373_7643.JPEG 2
n01644373/n01644373_7666.JPEG 2
n01644373/n01644373_768.JPEG 2
n01644373/n01644373_773.JPEG 2
n01644373/n01644373_7759.JPEG 2
n01644373/n01644373_776.JPEG 2
n01644373/n01644373_7765.JPEG 2
n01644373/n01644373_7792.JPEG 2
n01644373/n01644373_7793.JPEG 2
n01644373/n01644373_7803.JPEG 2
n01644373/n01644373_7806.JPEG 2
n01644373/n01644373_7812.JPEG 2
n01644373/n01644373_7819.JPEG 2
n01644373/n01644373_7827.JPEG 2
n01644373/n01644373_7839.JPEG 2
n01644373/n01644373_7853.JPEG 2
n01644373/n01644373_7861.JPEG 2
n01644373/n01644373_7863.JPEG 2
n01644373/n01644373_7864.JPEG 2
n01644373/n01644373_7867.JPEG 2
n01644373/n01644373_7872.JPEG 2
n01644373/n01644373_788.JPEG 2
n01644373/n01644373_7901.JPEG 2
n01644373/n01644373_7944.JPEG 2
n01644373/n01644373_7962.JPEG 2
n01644373/n01644373_7971.JPEG 2
n01644373/n01644373_7975.JPEG 2
n01644373/n01644373_7981.JPEG 2
n01644373/n01644373_7983.JPEG 2
n01644373/n01644373_7984.JPEG 2
n01644373/n01644373_7988.JPEG 2
n01644373/n01644373_7998.JPEG 2
n01644373/n01644373_800.JPEG 2
n01644373/n01644373_8008.JPEG 2
n01644373/n01644373_8012.JPEG 2
n01644373/n01644373_8019.JPEG 2
n01644373/n01644373_8023.JPEG 2
n01644373/n01644373_8029.JPEG 2
n01644373/n01644373_8033.JPEG 2
n01644373/n01644373_8037.JPEG 2
n01644373/n01644373_8042.JPEG 2
n01644373/n01644373_8044.JPEG 2
n01644373/n01644373_8051.JPEG 2
n01644373/n01644373_8066.JPEG 2
n01644373/n01644373_8084.JPEG 2
n01644373/n01644373_8101.JPEG 2
n01644373/n01644373_8123.JPEG 2
n01644373/n01644373_8124.JPEG 2
n01644373/n01644373_8128.JPEG 2
n01644373/n01644373_815.JPEG 2
n01644373/n01644373_816.JPEG 2
n01644373/n01644373_8163.JPEG 2
n01644373/n01644373_8175.JPEG 2
n01644373/n01644373_8183.JPEG 2
n01644373/n01644373_8187.JPEG 2
n01644373/n01644373_8209.JPEG 2
n01644373/n01644373_8225.JPEG 2
n01644373/n01644373_8227.JPEG 2
n01644373/n01644373_8234.JPEG 2
n01644373/n01644373_8242.JPEG 2
n01644373/n01644373_8248.JPEG 2
n01644373/n01644373_8249.JPEG 2
n01644373/n01644373_8268.JPEG 2
n01644373/n01644373_8283.JPEG 2
n01644373/n01644373_8284.JPEG 2
n01644373/n01644373_83.JPEG 2
n01644373/n01644373_8300.JPEG 2
n01644373/n01644373_8303.JPEG 2
n01644373/n01644373_8305.JPEG 2
n01644373/n01644373_8308.JPEG 2
n01644373/n01644373_8327.JPEG 2
n01644373/n01644373_8334.JPEG 2
n01644373/n01644373_8343.JPEG 2
n01644373/n01644373_8352.JPEG 2
n01644373/n01644373_8354.JPEG 2
n01644373/n01644373_8384.JPEG 2
n01644373/n01644373_8387.JPEG 2
n01644373/n01644373_8402.JPEG 2
n01644373/n01644373_8413.JPEG 2
n01644373/n01644373_8430.JPEG 2
n01644373/n01644373_8431.JPEG 2
n01644373/n01644373_8437.JPEG 2
n01644373/n01644373_8442.JPEG 2
n01644373/n01644373_8451.JPEG 2
n01644373/n01644373_8452.JPEG 2
n01644373/n01644373_8459.JPEG 2
n01644373/n01644373_8466.JPEG 2
n01644373/n01644373_8469.JPEG 2
n01644373/n01644373_8472.JPEG 2
n01644373/n01644373_8487.JPEG 2
n01644373/n01644373_8489.JPEG 2
n01644373/n01644373_8505.JPEG 2
n01644373/n01644373_851.JPEG 2
n01644373/n01644373_8512.JPEG 2
n01644373/n01644373_8514.JPEG 2
n01644373/n01644373_8517.JPEG 2
n01644373/n01644373_8524.JPEG 2
n01644373/n01644373_8525.JPEG 2
n01644373/n01644373_8543.JPEG 2
n01644373/n01644373_8548.JPEG 2
n01644373/n01644373_8556.JPEG 2
n01644373/n01644373_8560.JPEG 2
n01644373/n01644373_8567.JPEG 2
n01644373/n01644373_8572.JPEG 2
n01644373/n01644373_8583.JPEG 2
n01644373/n01644373_8588.JPEG 2
n01644373/n01644373_8591.JPEG 2
n01644373/n01644373_8600.JPEG 2
n01644373/n01644373_8602.JPEG 2
n01644373/n01644373_8603.JPEG 2
n01644373/n01644373_8609.JPEG 2
n01644373/n01644373_8610.JPEG 2
n01644373/n01644373_8617.JPEG 2
n01644373/n01644373_8624.JPEG 2
n01644373/n01644373_8625.JPEG 2
n01644373/n01644373_8643.JPEG 2
n01644373/n01644373_8645.JPEG 2
n01644373/n01644373_8659.JPEG 2
n01644373/n01644373_8661.JPEG 2
n01644373/n01644373_8677.JPEG 2
n01644373/n01644373_8683.JPEG 2
n01644373/n01644373_8689.JPEG 2
n01644373/n01644373_8692.JPEG 2
n01644373/n01644373_8696.JPEG 2
n01644373/n01644373_8709.JPEG 2
n01644373/n01644373_8712.JPEG 2
n01644373/n01644373_8718.JPEG 2
n01644373/n01644373_8730.JPEG 2
n01644373/n01644373_8740.JPEG 2
n01644373/n01644373_8749.JPEG 2
n01644373/n01644373_8751.JPEG 2
n01644373/n01644373_8762.JPEG 2
n01644373/n01644373_8771.JPEG 2
n01644373/n01644373_8785.JPEG 2
n01644373/n01644373_8801.JPEG 2
n01644373/n01644373_8802.JPEG 2
n01644373/n01644373_8803.JPEG 2
n01644373/n01644373_8807.JPEG 2
n01644373/n01644373_8809.JPEG 2
n01644373/n01644373_881.JPEG 2
n01644373/n01644373_8816.JPEG 2
n01644373/n01644373_882.JPEG 2
n01644373/n01644373_8822.JPEG 2
n01644373/n01644373_8827.JPEG 2
n01644373/n01644373_8842.JPEG 2
n01644373/n01644373_8858.JPEG 2
n01644373/n01644373_8865.JPEG 2
n01644373/n01644373_8889.JPEG 2
n01644373/n01644373_889.JPEG 2
n01644373/n01644373_8906.JPEG 2
n01644373/n01644373_8916.JPEG 2
n01644373/n01644373_8925.JPEG 2
n01644373/n01644373_8930.JPEG 2
n01644373/n01644373_8947.JPEG 2
n01644373/n01644373_8948.JPEG 2
n01644373/n01644373_8968.JPEG 2
n01644373/n01644373_8986.JPEG 2
n01644373/n01644373_8987.JPEG 2
n01644373/n01644373_8997.JPEG 2
n01644373/n01644373_8998.JPEG 2
n01644373/n01644373_9007.JPEG 2
n01644373/n01644373_9008.JPEG 2
n01644373/n01644373_9021.JPEG 2
n01644373/n01644373_9031.JPEG 2
n01644373/n01644373_9040.JPEG 2
n01644373/n01644373_9056.JPEG 2
n01644373/n01644373_9061.JPEG 2
n01644373/n01644373_9073.JPEG 2
n01644373/n01644373_9078.JPEG 2
n01644373/n01644373_9083.JPEG 2
n01644373/n01644373_91.JPEG 2
n01644373/n01644373_9106.JPEG 2
n01644373/n01644373_9108.JPEG 2
n01644373/n01644373_9111.JPEG 2
n01644373/n01644373_9138.JPEG 2
n01644373/n01644373_9143.JPEG 2
n01644373/n01644373_9163.JPEG 2
n01644373/n01644373_9174.JPEG 2
n01644373/n01644373_9194.JPEG 2
n01644373/n01644373_9203.JPEG 2
n01644373/n01644373_9205.JPEG 2
n01644373/n01644373_9212.JPEG 2
n01644373/n01644373_9228.JPEG 2
n01644373/n01644373_9229.JPEG 2
n01644373/n01644373_9233.JPEG 2
n01644373/n01644373_9261.JPEG 2
n01644373/n01644373_9268.JPEG 2
n01644373/n01644373_9284.JPEG 2
n01644373/n01644373_929.JPEG 2
n01644373/n01644373_9293.JPEG 2
n01644373/n01644373_9308.JPEG 2
n01644373/n01644373_9310.JPEG 2
n01644373/n01644373_9343.JPEG 2
n01644373/n01644373_9345.JPEG 2
n01644373/n01644373_9352.JPEG 2
n01644373/n01644373_9357.JPEG 2
n01644373/n01644373_936.JPEG 2
n01644373/n01644373_9372.JPEG 2
n01644373/n01644373_9404.JPEG 2
n01644373/n01644373_9406.JPEG 2
n01644373/n01644373_9407.JPEG 2
n01644373/n01644373_9416.JPEG 2
n01644373/n01644373_9439.JPEG 2
n01644373/n01644373_9445.JPEG 2
n01644373/n01644373_9458.JPEG 2
n01644373/n01644373_9462.JPEG 2
n01644373/n01644373_9468.JPEG 2
n01644373/n01644373_9477.JPEG 2
n01644373/n01644373_9497.JPEG 2
n01644373/n01644373_9504.JPEG 2
n01644373/n01644373_9527.JPEG 2
n01644373/n01644373_9566.JPEG 2
n01644373/n01644373_9568.JPEG 2
n01644373/n01644373_9572.JPEG 2
n01644373/n01644373_9575.JPEG 2
n01644373/n01644373_9588.JPEG 2
n01644373/n01644373_9606.JPEG 2
n01644373/n01644373_961.JPEG 2
n01644373/n01644373_9615.JPEG 2
n01644373/n01644373_9643.JPEG 2
n01644373/n01644373_9669.JPEG 2
n01644373/n01644373_9677.JPEG 2
n01644373/n01644373_9693.JPEG 2
n01644373/n01644373_9694.JPEG 2
n01644373/n01644373_9709.JPEG 2
n01644373/n01644373_9711.JPEG 2
n01644373/n01644373_9718.JPEG 2
n01644373/n01644373_9719.JPEG 2
n01644373/n01644373_9727.JPEG 2
n01644373/n01644373_9779.JPEG 2
n01644373/n01644373_9780.JPEG 2
n01644373/n01644373_9792.JPEG 2
n01644373/n01644373_9795.JPEG 2
n01644373/n01644373_9799.JPEG 2
n01644373/n01644373_9808.JPEG 2
n01644373/n01644373_9835.JPEG 2
n01644373/n01644373_9855.JPEG 2
n01644373/n01644373_9880.JPEG 2
n01644373/n01644373_9910.JPEG 2
n01644373/n01644373_9936.JPEG 2
n01644373/n01644373_9944.JPEG 2
n01644373/n01644373_9947.JPEG 2
n01644373/n01644373_9958.JPEG 2
n01644373/n01644373_9964.JPEG 2
n01644373/n01644373_9966.JPEG 2
n01644373/n01644373_9974.JPEG 2
n01644373/n01644373_998.JPEG 2
n01644373/n01644373_9981.JPEG 2
n01644373/n01644373_9992.JPEG 2
n01644900/n01644900_10004.JPEG 2
n01644900/n01644900_10011.JPEG 2
n01644900/n01644900_10014.JPEG 2
n01644900/n01644900_1006.JPEG 2
n01644900/n01644900_10085.JPEG 2
n01644900/n01644900_1009.JPEG 2
n01644900/n01644900_10110.JPEG 2
n01644900/n01644900_10115.JPEG 2
n01644900/n01644900_10133.JPEG 2
n01644900/n01644900_10159.JPEG 2
n01644900/n01644900_1017.JPEG 2
n01644900/n01644900_10176.JPEG 2
n01644900/n01644900_10220.JPEG 2
n01644900/n01644900_1024.JPEG 2
n01644900/n01644900_10241.JPEG 2
n01644900/n01644900_10247.JPEG 2
n01644900/n01644900_10254.JPEG 2
n01644900/n01644900_10255.JPEG 2
n01644900/n01644900_10272.JPEG 2
n01644900/n01644900_1033.JPEG 2
n01644900/n01644900_1035.JPEG 2
n01644900/n01644900_10385.JPEG 2
n01644900/n01644900_10432.JPEG 2
n01644900/n01644900_10436.JPEG 2
n01644900/n01644900_10500.JPEG 2
n01644900/n01644900_10558.JPEG 2
n01644900/n01644900_1060.JPEG 2
n01644900/n01644900_10638.JPEG 2
n01644900/n01644900_10661.JPEG 2
n01644900/n01644900_1068.JPEG 2
n01644900/n01644900_10686.JPEG 2
n01644900/n01644900_10691.JPEG 2
n01644900/n01644900_10697.JPEG 2
n01644900/n01644900_10701.JPEG 2
n01644900/n01644900_10743.JPEG 2
n01644900/n01644900_10749.JPEG 2
n01644900/n01644900_10768.JPEG 2
n01644900/n01644900_1087.JPEG 2
n01644900/n01644900_10896.JPEG 2
n01644900/n01644900_10899.JPEG 2
n01644900/n01644900_10981.JPEG 2
n01644900/n01644900_11001.JPEG 2
n01644900/n01644900_11003.JPEG 2
n01644900/n01644900_11007.JPEG 2
n01644900/n01644900_11023.JPEG 2
n01644900/n01644900_11041.JPEG 2
n01644900/n01644900_11051.JPEG 2
n01644900/n01644900_11059.JPEG 2
n01644900/n01644900_11066.JPEG 2
n01644900/n01644900_11092.JPEG 2
n01644900/n01644900_11098.JPEG 2
n01644900/n01644900_11113.JPEG 2
n01644900/n01644900_11123.JPEG 2
n01644900/n01644900_11125.JPEG 2
n01644900/n01644900_11160.JPEG 2
n01644900/n01644900_11189.JPEG 2
n01644900/n01644900_11197.JPEG 2
n01644900/n01644900_11204.JPEG 2
n01644900/n01644900_11257.JPEG 2
n01644900/n01644900_11296.JPEG 2
n01644900/n01644900_11299.JPEG 2
n01644900/n01644900_11302.JPEG 2
n01644900/n01644900_11329.JPEG 2
n01644900/n01644900_11364.JPEG 2
n01644900/n01644900_11368.JPEG 2
n01644900/n01644900_11386.JPEG 2
n01644900/n01644900_11393.JPEG 2
n01644900/n01644900_11399.JPEG 2
n01644900/n01644900_11401.JPEG 2
n01644900/n01644900_11415.JPEG 2
n01644900/n01644900_11467.JPEG 2
n01644900/n01644900_11471.JPEG 2
n01644900/n01644900_11489.JPEG 2
n01644900/n01644900_11502.JPEG 2
n01644900/n01644900_11506.JPEG 2
n01644900/n01644900_11534.JPEG 2
n01644900/n01644900_11565.JPEG 2
n01644900/n01644900_11569.JPEG 2
n01644900/n01644900_11571.JPEG 2
n01644900/n01644900_11585.JPEG 2
n01644900/n01644900_11587.JPEG 2
n01644900/n01644900_11589.JPEG 2
n01644900/n01644900_11591.JPEG 2
n01644900/n01644900_1160.JPEG 2
n01644900/n01644900_11612.JPEG 2
n01644900/n01644900_11634.JPEG 2
n01644900/n01644900_1166.JPEG 2
n01644900/n01644900_11709.JPEG 2
n01644900/n01644900_1172.JPEG 2
n01644900/n01644900_11738.JPEG 2
n01644900/n01644900_11754.JPEG 2
n01644900/n01644900_11792.JPEG 2
n01644900/n01644900_11806.JPEG 2
n01644900/n01644900_11818.JPEG 2
n01644900/n01644900_11843.JPEG 2
n01644900/n01644900_11860.JPEG 2
n01644900/n01644900_11876.JPEG 2
n01644900/n01644900_11887.JPEG 2
n01644900/n01644900_11896.JPEG 2
n01644900/n01644900_11911.JPEG 2
n01644900/n01644900_11914.JPEG 2
n01644900/n01644900_11919.JPEG 2
n01644900/n01644900_1192.JPEG 2
n01644900/n01644900_11927.JPEG 2
n01644900/n01644900_11946.JPEG 2
n01644900/n01644900_11955.JPEG 2
n01644900/n01644900_11965.JPEG 2
n01644900/n01644900_11984.JPEG 2
n01644900/n01644900_11992.JPEG 2
n01644900/n01644900_12020.JPEG 2
n01644900/n01644900_1203.JPEG 2
n01644900/n01644900_12034.JPEG 2
n01644900/n01644900_12044.JPEG 2
n01644900/n01644900_12045.JPEG 2
n01644900/n01644900_12055.JPEG 2
n01644900/n01644900_12061.JPEG 2
n01644900/n01644900_1208.JPEG 2
n01644900/n01644900_12084.JPEG 2
n01644900/n01644900_12086.JPEG 2
n01644900/n01644900_12102.JPEG 2
n01644900/n01644900_1211.JPEG 2
n01644900/n01644900_12116.JPEG 2
n01644900/n01644900_12178.JPEG 2
n01644900/n01644900_12186.JPEG 2
n01644900/n01644900_1220.JPEG 2
n01644900/n01644900_12200.JPEG 2
n01644900/n01644900_12202.JPEG 2
n01644900/n01644900_12203.JPEG 2
n01644900/n01644900_12238.JPEG 2
n01644900/n01644900_12243.JPEG 2
n01644900/n01644900_12247.JPEG 2
n01644900/n01644900_12258.JPEG 2
n01644900/n01644900_12286.JPEG 2
n01644900/n01644900_12289.JPEG 2
n01644900/n01644900_12296.JPEG 2
n01644900/n01644900_12304.JPEG 2
n01644900/n01644900_12308.JPEG 2
n01644900/n01644900_12322.JPEG 2
n01644900/n01644900_12337.JPEG 2
n01644900/n01644900_12343.JPEG 2
n01644900/n01644900_1239.JPEG 2
n01644900/n01644900_12408.JPEG 2
n01644900/n01644900_12431.JPEG 2
n01644900/n01644900_12433.JPEG 2
n01644900/n01644900_12461.JPEG 2
n01644900/n01644900_12475.JPEG 2
n01644900/n01644900_12499.JPEG 2
n01644900/n01644900_12505.JPEG 2
n01644900/n01644900_12523.JPEG 2
n01644900/n01644900_12555.JPEG 2
n01644900/n01644900_12557.JPEG 2
n01644900/n01644900_12574.JPEG 2
n01644900/n01644900_12585.JPEG 2
n01644900/n01644900_12609.JPEG 2
n01644900/n01644900_12615.JPEG 2
n01644900/n01644900_12642.JPEG 2
n01644900/n01644900_12643.JPEG 2
n01644900/n01644900_12658.JPEG 2
n01644900/n01644900_12666.JPEG 2
n01644900/n01644900_12702.JPEG 2
n01644900/n01644900_12766.JPEG 2
n01644900/n01644900_12789.JPEG 2
n01644900/n01644900_12828.JPEG 2
n01644900/n01644900_12880.JPEG 2
n01644900/n01644900_12895.JPEG 2
n01644900/n01644900_12905.JPEG 2
n01644900/n01644900_12929.JPEG 2
n01644900/n01644900_12954.JPEG 2
n01644900/n01644900_12965.JPEG 2
n01644900/n01644900_12980.JPEG 2
n01644900/n01644900_12986.JPEG 2
n01644900/n01644900_12989.JPEG 2
n01644900/n01644900_13002.JPEG 2
n01644900/n01644900_13008.JPEG 2
n01644900/n01644900_13046.JPEG 2
n01644900/n01644900_13077.JPEG 2
n01644900/n01644900_13094.JPEG 2
n01644900/n01644900_13150.JPEG 2
n01644900/n01644900_13153.JPEG 2
n01644900/n01644900_13155.JPEG 2
n01644900/n01644900_13164.JPEG 2
n01644900/n01644900_13169.JPEG 2
n01644900/n01644900_1317.JPEG 2
n01644900/n01644900_13170.JPEG 2
n01644900/n01644900_13175.JPEG 2
n01644900/n01644900_1318.JPEG 2
n01644900/n01644900_13186.JPEG 2
n01644900/n01644900_13193.JPEG 2
n01644900/n01644900_13217.JPEG 2
n01644900/n01644900_13222.JPEG 2
n01644900/n01644900_13229.JPEG 2
n01644900/n01644900_13239.JPEG 2
n01644900/n01644900_13261.JPEG 2
n01644900/n01644900_13269.JPEG 2
n01644900/n01644900_1327.JPEG 2
n01644900/n01644900_13295.JPEG 2
n01644900/n01644900_13323.JPEG 2
n01644900/n01644900_13331.JPEG 2
n01644900/n01644900_13369.JPEG 2
n01644900/n01644900_13378.JPEG 2
n01644900/n01644900_13381.JPEG 2
n01644900/n01644900_13388.JPEG 2
n01644900/n01644900_13390.JPEG 2
n01644900/n01644900_13391.JPEG 2
n01644900/n01644900_13395.JPEG 2
n01644900/n01644900_13400.JPEG 2
n01644900/n01644900_13437.JPEG 2
n01644900/n01644900_1344.JPEG 2
n01644900/n01644900_1346.JPEG 2
n01644900/n01644900_13478.JPEG 2
n01644900/n01644900_13492.JPEG 2
n01644900/n01644900_13504.JPEG 2
n01644900/n01644900_13528.JPEG 2
n01644900/n01644900_13540.JPEG 2
n01644900/n01644900_13548.JPEG 2
n01644900/n01644900_13597.JPEG 2
n01644900/n01644900_13639.JPEG 2
n01644900/n01644900_1364.JPEG 2
n01644900/n01644900_13646.JPEG 2
n01644900/n01644900_13678.JPEG 2
n01644900/n01644900_13679.JPEG 2
n01644900/n01644900_13710.JPEG 2
n01644900/n01644900_13711.JPEG 2
n01644900/n01644900_13728.JPEG 2
n01644900/n01644900_13830.JPEG 2
n01644900/n01644900_1386.JPEG 2
n01644900/n01644900_13871.JPEG 2
n01644900/n01644900_13889.JPEG 2
n01644900/n01644900_13899.JPEG 2
n01644900/n01644900_13905.JPEG 2
n01644900/n01644900_13937.JPEG 2
n01644900/n01644900_13954.JPEG 2
n01644900/n01644900_13989.JPEG 2
n01644900/n01644900_14046.JPEG 2
n01644900/n01644900_14105.JPEG 2
n01644900/n01644900_14124.JPEG 2
n01644900/n01644900_14131.JPEG 2
n01644900/n01644900_1415.JPEG 2
n01644900/n01644900_14181.JPEG 2
n01644900/n01644900_14182.JPEG 2
n01644900/n01644900_1426.JPEG 2
n01644900/n01644900_1427.JPEG 2
n01644900/n01644900_1430.JPEG 2
n01644900/n01644900_14312.JPEG 2
n01644900/n01644900_14377.JPEG 2
n01644900/n01644900_14384.JPEG 2
n01644900/n01644900_14396.JPEG 2
n01644900/n01644900_14423.JPEG 2
n01644900/n01644900_14449.JPEG 2
n01644900/n01644900_14464.JPEG 2
n01644900/n01644900_1447.JPEG 2
n01644900/n01644900_14487.JPEG 2
n01644900/n01644900_14490.JPEG 2
n01644900/n01644900_14532.JPEG 2
n01644900/n01644900_14551.JPEG 2
n01644900/n01644900_1459.JPEG 2
n01644900/n01644900_14653.JPEG 2
n01644900/n01644900_14679.JPEG 2
n01644900/n01644900_14686.JPEG 2
n01644900/n01644900_14707.JPEG 2
n01644900/n01644900_1471.JPEG 2
n01644900/n01644900_14723.JPEG 2
n01644900/n01644900_14739.JPEG 2
n01644900/n01644900_148.JPEG 2
n01644900/n01644900_14931.JPEG 2
n01644900/n01644900_14944.JPEG 2
n01644900/n01644900_14959.JPEG 2
n01644900/n01644900_15021.JPEG 2
n01644900/n01644900_15036.JPEG 2
n01644900/n01644900_15047.JPEG 2
n01644900/n01644900_15089.JPEG 2
n01644900/n01644900_1509.JPEG 2
n01644900/n01644900_151.JPEG 2
n01644900/n01644900_15161.JPEG 2
n01644900/n01644900_15163.JPEG 2
n01644900/n01644900_15171.JPEG 2
n01644900/n01644900_1520.JPEG 2
n01644900/n01644900_15230.JPEG 2
n01644900/n01644900_15236.JPEG 2
n01644900/n01644900_15280.JPEG 2
n01644900/n01644900_15303.JPEG 2
n01644900/n01644900_15317.JPEG 2
n01644900/n01644900_15347.JPEG 2
n01644900/n01644900_15368.JPEG 2
n01644900/n01644900_1540.JPEG 2
n01644900/n01644900_15400.JPEG 2
n01644900/n01644900_15415.JPEG 2
n01644900/n01644900_15473.JPEG 2
n01644900/n01644900_15487.JPEG 2
n01644900/n01644900_1550.JPEG 2
n01644900/n01644900_15512.JPEG 2
n01644900/n01644900_15545.JPEG 2
n01644900/n01644900_15559.JPEG 2
n01644900/n01644900_15563.JPEG 2
n01644900/n01644900_15565.JPEG 2
n01644900/n01644900_15566.JPEG 2
n01644900/n01644900_15584.JPEG 2
n01644900/n01644900_15602.JPEG 2
n01644900/n01644900_15620.JPEG 2
n01644900/n01644900_1563.JPEG 2
n01644900/n01644900_15653.JPEG 2
n01644900/n01644900_15675.JPEG 2
n01644900/n01644900_15705.JPEG 2
n01644900/n01644900_15727.JPEG 2
n01644900/n01644900_15761.JPEG 2
n01644900/n01644900_15769.JPEG 2
n01644900/n01644900_15779.JPEG 2
n01644900/n01644900_15790.JPEG 2
n01644900/n01644900_158.JPEG 2
n01644900/n01644900_1581.JPEG 2
n01644900/n01644900_15827.JPEG 2
n01644900/n01644900_1587.JPEG 2
n01644900/n01644900_15886.JPEG 2
n01644900/n01644900_15908.JPEG 2
n01644900/n01644900_15930.JPEG 2
n01644900/n01644900_15945.JPEG 2
n01644900/n01644900_15954.JPEG 2
n01644900/n01644900_15956.JPEG 2
n01644900/n01644900_16023.JPEG 2
n01644900/n01644900_1609.JPEG 2
n01644900/n01644900_1612.JPEG 2
n01644900/n01644900_16125.JPEG 2
n01644900/n01644900_16129.JPEG 2
n01644900/n01644900_16139.JPEG 2
n01644900/n01644900_1616.JPEG 2
n01644900/n01644900_16176.JPEG 2
n01644900/n01644900_162.JPEG 2
n01644900/n01644900_16209.JPEG 2
n01644900/n01644900_16225.JPEG 2
n01644900/n01644900_16264.JPEG 2
n01644900/n01644900_16266.JPEG 2
n01644900/n01644900_16287.JPEG 2
n01644900/n01644900_16289.JPEG 2
n01644900/n01644900_16299.JPEG 2
n01644900/n01644900_16312.JPEG 2
n01644900/n01644900_16317.JPEG 2
n01644900/n01644900_1632.JPEG 2
n01644900/n01644900_16329.JPEG 2
n01644900/n01644900_16381.JPEG 2
n01644900/n01644900_16416.JPEG 2
n01644900/n01644900_16421.JPEG 2
n01644900/n01644900_16424.JPEG 2
n01644900/n01644900_16453.JPEG 2
n01644900/n01644900_16486.JPEG 2
n01644900/n01644900_16499.JPEG 2
n01644900/n01644900_16511.JPEG 2
n01644900/n01644900_16533.JPEG 2
n01644900/n01644900_16580.JPEG 2
n01644900/n01644900_1662.JPEG 2
n01644900/n01644900_16623.JPEG 2
n01644900/n01644900_16659.JPEG 2
n01644900/n01644900_16671.JPEG 2
n01644900/n01644900_16680.JPEG 2
n01644900/n01644900_1669.JPEG 2
n01644900/n01644900_16692.JPEG 2
n01644900/n01644900_1670.JPEG 2
n01644900/n01644900_16707.JPEG 2
n01644900/n01644900_16752.JPEG 2
n01644900/n01644900_16785.JPEG 2
n01644900/n01644900_16820.JPEG 2
n01644900/n01644900_16888.JPEG 2
n01644900/n01644900_16893.JPEG 2
n01644900/n01644900_16900.JPEG 2
n01644900/n01644900_16908.JPEG 2
n01644900/n01644900_16928.JPEG 2
n01644900/n01644900_16980.JPEG 2
n01644900/n01644900_16983.JPEG 2
n01644900/n01644900_17022.JPEG 2
n01644900/n01644900_17033.JPEG 2
n01644900/n01644900_1704.JPEG 2
n01644900/n01644900_17043.JPEG 2
n01644900/n01644900_17046.JPEG 2
n01644900/n01644900_1705.JPEG 2
n01644900/n01644900_17051.JPEG 2
n01644900/n01644900_17058.JPEG 2
n01644900/n01644900_17082.JPEG 2
n01644900/n01644900_17111.JPEG 2
n01644900/n01644900_17112.JPEG 2
n01644900/n01644900_17138.JPEG 2
n01644900/n01644900_17142.JPEG 2
n01644900/n01644900_17149.JPEG 2
n01644900/n01644900_1717.JPEG 2
n01644900/n01644900_17205.JPEG 2
n01644900/n01644900_17222.JPEG 2
n01644900/n01644900_17256.JPEG 2
n01644900/n01644900_1727.JPEG 2
n01644900/n01644900_1728.JPEG 2
n01644900/n01644900_17290.JPEG 2
n01644900/n01644900_17292.JPEG 2
n01644900/n01644900_17336.JPEG 2
n01644900/n01644900_17351.JPEG 2
n01644900/n01644900_17397.JPEG 2
n01644900/n01644900_17401.JPEG 2
n01644900/n01644900_17409.JPEG 2
n01644900/n01644900_17439.JPEG 2
n01644900/n01644900_17468.JPEG 2
n01644900/n01644900_17539.JPEG 2
n01644900/n01644900_17617.JPEG 2
n01644900/n01644900_17621.JPEG 2
n01644900/n01644900_17627.JPEG 2
n01644900/n01644900_17635.JPEG 2
n01644900/n01644900_17662.JPEG 2
n01644900/n01644900_17672.JPEG 2
n01644900/n01644900_17684.JPEG 2
n01644900/n01644900_17691.JPEG 2
n01644900/n01644900_17709.JPEG 2
n01644900/n01644900_17732.JPEG 2
n01644900/n01644900_17761.JPEG 2
n01644900/n01644900_1777.JPEG 2
n01644900/n01644900_1778.JPEG 2
n01644900/n01644900_17785.JPEG 2
n01644900/n01644900_17839.JPEG 2
n01644900/n01644900_1785.JPEG 2
n01644900/n01644900_1787.JPEG 2
n01644900/n01644900_17875.JPEG 2
n01644900/n01644900_17878.JPEG 2
n01644900/n01644900_17907.JPEG 2
n01644900/n01644900_17912.JPEG 2
n01644900/n01644900_17923.JPEG 2
n01644900/n01644900_17928.JPEG 2
n01644900/n01644900_17940.JPEG 2
n01644900/n01644900_17966.JPEG 2
n01644900/n01644900_17985.JPEG 2
n01644900/n01644900_18002.JPEG 2
n01644900/n01644900_18022.JPEG 2
n01644900/n01644900_18027.JPEG 2
n01644900/n01644900_1803.JPEG 2
n01644900/n01644900_18046.JPEG 2
n01644900/n01644900_18064.JPEG 2
n01644900/n01644900_18077.JPEG 2
n01644900/n01644900_18080.JPEG 2
n01644900/n01644900_18110.JPEG 2
n01644900/n01644900_18142.JPEG 2
n01644900/n01644900_18144.JPEG 2
n01644900/n01644900_18164.JPEG 2
n01644900/n01644900_18166.JPEG 2
n01644900/n01644900_18187.JPEG 2
n01644900/n01644900_18244.JPEG 2
n01644900/n01644900_18256.JPEG 2
n01644900/n01644900_18272.JPEG 2
n01644900/n01644900_183.JPEG 2
n01644900/n01644900_18327.JPEG 2
n01644900/n01644900_18331.JPEG 2
n01644900/n01644900_18353.JPEG 2
n01644900/n01644900_18356.JPEG 2
n01644900/n01644900_18367.JPEG 2
n01644900/n01644900_18400.JPEG 2
n01644900/n01644900_18415.JPEG 2
n01644900/n01644900_18438.JPEG 2
n01644900/n01644900_18442.JPEG 2
n01644900/n01644900_18454.JPEG 2
n01644900/n01644900_18466.JPEG 2
n01644900/n01644900_18469.JPEG 2
n01644900/n01644900_1848.JPEG 2
n01644900/n01644900_18494.JPEG 2
n01644900/n01644900_18506.JPEG 2
n01644900/n01644900_18516.JPEG 2
n01644900/n01644900_1852.JPEG 2
n01644900/n01644900_18555.JPEG 2
n01644900/n01644900_18583.JPEG 2
n01644900/n01644900_1859.JPEG 2
n01644900/n01644900_1860.JPEG 2
n01644900/n01644900_18683.JPEG 2
n01644900/n01644900_1869.JPEG 2
n01644900/n01644900_18737.JPEG 2
n01644900/n01644900_18746.JPEG 2
n01644900/n01644900_18750.JPEG 2
n01644900/n01644900_18751.JPEG 2
n01644900/n01644900_18788.JPEG 2
n01644900/n01644900_18797.JPEG 2
n01644900/n01644900_18815.JPEG 2
n01644900/n01644900_18817.JPEG 2
n01644900/n01644900_18822.JPEG 2
n01644900/n01644900_18841.JPEG 2
n01644900/n01644900_18850.JPEG 2
n01644900/n01644900_18879.JPEG 2
n01644900/n01644900_1888.JPEG 2
n01644900/n01644900_1889.JPEG 2
n01644900/n01644900_18890.JPEG 2
n01644900/n01644900_18899.JPEG 2
n01644900/n01644900_18902.JPEG 2
n01644900/n01644900_18905.JPEG 2
n01644900/n01644900_18944.JPEG 2
n01644900/n01644900_19.JPEG 2
n01644900/n01644900_19040.JPEG 2
n01644900/n01644900_1907.JPEG 2
n01644900/n01644900_19105.JPEG 2
n01644900/n01644900_1911.JPEG 2
n01644900/n01644900_19147.JPEG 2
n01644900/n01644900_19148.JPEG 2
n01644900/n01644900_19169.JPEG 2
n01644900/n01644900_19178.JPEG 2
n01644900/n01644900_19188.JPEG 2
n01644900/n01644900_19234.JPEG 2
n01644900/n01644900_19251.JPEG 2
n01644900/n01644900_19262.JPEG 2
n01644900/n01644900_19265.JPEG 2
n01644900/n01644900_19289.JPEG 2
n01644900/n01644900_19304.JPEG 2
n01644900/n01644900_19318.JPEG 2
n01644900/n01644900_19340.JPEG 2
n01644900/n01644900_19341.JPEG 2
n01644900/n01644900_1935.JPEG 2
n01644900/n01644900_19353.JPEG 2
n01644900/n01644900_19375.JPEG 2
n01644900/n01644900_19382.JPEG 2
n01644900/n01644900_1941.JPEG 2
n01644900/n01644900_19442.JPEG 2
n01644900/n01644900_1946.JPEG 2
n01644900/n01644900_19465.JPEG 2
n01644900/n01644900_19498.JPEG 2
n01644900/n01644900_19520.JPEG 2
n01644900/n01644900_19522.JPEG 2
n01644900/n01644900_19527.JPEG 2
n01644900/n01644900_19534.JPEG 2
n01644900/n01644900_19547.JPEG 2
n01644900/n01644900_19556.JPEG 2
n01644900/n01644900_19559.JPEG 2
n01644900/n01644900_19568.JPEG 2
n01644900/n01644900_19596.JPEG 2
n01644900/n01644900_1960.JPEG 2
n01644900/n01644900_19601.JPEG 2
n01644900/n01644900_19617.JPEG 2
n01644900/n01644900_19625.JPEG 2
n01644900/n01644900_1963.JPEG 2
n01644900/n01644900_1966.JPEG 2
n01644900/n01644900_19675.JPEG 2
n01644900/n01644900_19683.JPEG 2
n01644900/n01644900_19698.JPEG 2
n01644900/n01644900_19702.JPEG 2
n01644900/n01644900_19707.JPEG 2
n01644900/n01644900_1974.JPEG 2
n01644900/n01644900_19752.JPEG 2
n01644900/n01644900_1977.JPEG 2
n01644900/n01644900_19771.JPEG 2
n01644900/n01644900_19777.JPEG 2
n01644900/n01644900_19782.JPEG 2
n01644900/n01644900_19795.JPEG 2
n01644900/n01644900_19825.JPEG 2
n01644900/n01644900_19845.JPEG 2
n01644900/n01644900_19891.JPEG 2
n01644900/n01644900_19936.JPEG 2
n01644900/n01644900_19945.JPEG 2
n01644900/n01644900_19959.JPEG 2
n01644900/n01644900_1999.JPEG 2
n01644900/n01644900_2000.JPEG 2
n01644900/n01644900_20004.JPEG 2
n01644900/n01644900_2001.JPEG 2
n01644900/n01644900_20030.JPEG 2
n01644900/n01644900_20031.JPEG 2
n01644900/n01644900_20036.JPEG 2
n01644900/n01644900_20045.JPEG 2
n01644900/n01644900_20054.JPEG 2
n01644900/n01644900_20079.JPEG 2
n01644900/n01644900_20082.JPEG 2
n01644900/n01644900_20088.JPEG 2
n01644900/n01644900_20097.JPEG 2
n01644900/n01644900_20107.JPEG 2
n01644900/n01644900_20134.JPEG 2
n01644900/n01644900_20161.JPEG 2
n01644900/n01644900_20163.JPEG 2
n01644900/n01644900_20167.JPEG 2
n01644900/n01644900_20170.JPEG 2
n01644900/n01644900_20174.JPEG 2
n01644900/n01644900_20181.JPEG 2
n01644900/n01644900_20198.JPEG 2
n01644900/n01644900_20255.JPEG 2
n01644900/n01644900_20270.JPEG 2
n01644900/n01644900_20336.JPEG 2
n01644900/n01644900_20357.JPEG 2
n01644900/n01644900_20379.JPEG 2
n01644900/n01644900_20390.JPEG 2
n01644900/n01644900_20396.JPEG 2
n01644900/n01644900_20405.JPEG 2
n01644900/n01644900_20407.JPEG 2
n01644900/n01644900_20412.JPEG 2
n01644900/n01644900_20418.JPEG 2
n01644900/n01644900_20432.JPEG 2
n01644900/n01644900_20442.JPEG 2
n01644900/n01644900_20455.JPEG 2
n01644900/n01644900_20491.JPEG 2
n01644900/n01644900_20501.JPEG 2
n01644900/n01644900_20526.JPEG 2
n01644900/n01644900_20530.JPEG 2
n01644900/n01644900_20543.JPEG 2
n01644900/n01644900_20544.JPEG 2
n01644900/n01644900_2055.JPEG 2
n01644900/n01644900_20562.JPEG 2
n01644900/n01644900_20563.JPEG 2
n01644900/n01644900_20569.JPEG 2
n01644900/n01644900_20581.JPEG 2
n01644900/n01644900_20590.JPEG 2
n01644900/n01644900_20620.JPEG 2
n01644900/n01644900_20652.JPEG 2
n01644900/n01644900_2068.JPEG 2
n01644900/n01644900_20697.JPEG 2
n01644900/n01644900_20699.JPEG 2
n01644900/n01644900_20709.JPEG 2
n01644900/n01644900_20747.JPEG 2
n01644900/n01644900_20761.JPEG 2
n01644900/n01644900_20770.JPEG 2
n01644900/n01644900_20777.JPEG 2
n01644900/n01644900_20855.JPEG 2
n01644900/n01644900_20856.JPEG 2
n01644900/n01644900_20877.JPEG 2
n01644900/n01644900_20886.JPEG 2
n01644900/n01644900_20901.JPEG 2
n01644900/n01644900_2097.JPEG 2
n01644900/n01644900_20987.JPEG 2
n01644900/n01644900_21001.JPEG 2
n01644900/n01644900_21010.JPEG 2
n01644900/n01644900_21022.JPEG 2
n01644900/n01644900_21044.JPEG 2
n01644900/n01644900_2105.JPEG 2
n01644900/n01644900_21064.JPEG 2
n01644900/n01644900_21067.JPEG 2
n01644900/n01644900_21086.JPEG 2
n01644900/n01644900_21087.JPEG 2
n01644900/n01644900_21103.JPEG 2
n01644900/n01644900_2111.JPEG 2
n01644900/n01644900_21120.JPEG 2
n01644900/n01644900_21163.JPEG 2
n01644900/n01644900_21174.JPEG 2
n01644900/n01644900_21223.JPEG 2
n01644900/n01644900_2123.JPEG 2
n01644900/n01644900_21257.JPEG 2
n01644900/n01644900_21269.JPEG 2
n01644900/n01644900_21270.JPEG 2
n01644900/n01644900_21287.JPEG 2
n01644900/n01644900_21290.JPEG 2
n01644900/n01644900_21302.JPEG 2
n01644900/n01644900_21306.JPEG 2
n01644900/n01644900_21331.JPEG 2
n01644900/n01644900_21351.JPEG 2
n01644900/n01644900_21362.JPEG 2
n01644900/n01644900_21385.JPEG 2
n01644900/n01644900_21407.JPEG 2
n01644900/n01644900_2141.JPEG 2
n01644900/n01644900_21427.JPEG 2
n01644900/n01644900_21442.JPEG 2
n01644900/n01644900_21457.JPEG 2
n01644900/n01644900_21466.JPEG 2
n01644900/n01644900_21477.JPEG 2
n01644900/n01644900_21539.JPEG 2
n01644900/n01644900_21551.JPEG 2
n01644900/n01644900_21557.JPEG 2
n01644900/n01644900_21560.JPEG 2
n01644900/n01644900_21571.JPEG 2
n01644900/n01644900_21597.JPEG 2
n01644900/n01644900_21598.JPEG 2
n01644900/n01644900_21616.JPEG 2
n01644900/n01644900_2163.JPEG 2
n01644900/n01644900_2166.JPEG 2
n01644900/n01644900_21683.JPEG 2
n01644900/n01644900_21690.JPEG 2
n01644900/n01644900_2178.JPEG 2
n01644900/n01644900_21785.JPEG 2
n01644900/n01644900_21824.JPEG 2
n01644900/n01644900_21832.JPEG 2
n01644900/n01644900_21835.JPEG 2
n01644900/n01644900_21854.JPEG 2
n01644900/n01644900_21890.JPEG 2
n01644900/n01644900_2194.JPEG 2
n01644900/n01644900_21945.JPEG 2
n01644900/n01644900_2195.JPEG 2
n01644900/n01644900_21953.JPEG 2
n01644900/n01644900_21994.JPEG 2
n01644900/n01644900_22010.JPEG 2
n01644900/n01644900_22036.JPEG 2
n01644900/n01644900_22049.JPEG 2
n01644900/n01644900_22071.JPEG 2
n01644900/n01644900_22079.JPEG 2
n01644900/n01644900_2209.JPEG 2
n01644900/n01644900_22093.JPEG 2
n01644900/n01644900_2213.JPEG 2
n01644900/n01644900_22130.JPEG 2
n01644900/n01644900_22136.JPEG 2
n01644900/n01644900_22147.JPEG 2
n01644900/n01644900_22163.JPEG 2
n01644900/n01644900_22166.JPEG 2
n01644900/n01644900_22170.JPEG 2
n01644900/n01644900_22172.JPEG 2
n01644900/n01644900_22181.JPEG 2
n01644900/n01644900_22196.JPEG 2
n01644900/n01644900_22199.JPEG 2
n01644900/n01644900_22206.JPEG 2
n01644900/n01644900_22234.JPEG 2
n01644900/n01644900_22239.JPEG 2
n01644900/n01644900_22268.JPEG 2
n01644900/n01644900_22285.JPEG 2
n01644900/n01644900_22318.JPEG 2
n01644900/n01644900_2232.JPEG 2
n01644900/n01644900_22326.JPEG 2
n01644900/n01644900_22328.JPEG 2
n01644900/n01644900_22331.JPEG 2
n01644900/n01644900_22368.JPEG 2
n01644900/n01644900_22386.JPEG 2
n01644900/n01644900_22391.JPEG 2
n01644900/n01644900_22425.JPEG 2
n01644900/n01644900_2244.JPEG 2
n01644900/n01644900_22452.JPEG 2
n01644900/n01644900_22503.JPEG 2
n01644900/n01644900_22528.JPEG 2
n01644900/n01644900_22539.JPEG 2
n01644900/n01644900_22540.JPEG 2
n01644900/n01644900_22554.JPEG 2
n01644900/n01644900_22567.JPEG 2
n01644900/n01644900_22570.JPEG 2
n01644900/n01644900_22572.JPEG 2
n01644900/n01644900_22575.JPEG 2
n01644900/n01644900_2259.JPEG 2
n01644900/n01644900_22601.JPEG 2
n01644900/n01644900_22615.JPEG 2
n01644900/n01644900_22618.JPEG 2
n01644900/n01644900_22645.JPEG 2
n01644900/n01644900_22654.JPEG 2
n01644900/n01644900_22660.JPEG 2
n01644900/n01644900_22662.JPEG 2
n01644900/n01644900_22665.JPEG 2
n01644900/n01644900_2267.JPEG 2
n01644900/n01644900_22699.JPEG 2
n01644900/n01644900_22702.JPEG 2
n01644900/n01644900_22735.JPEG 2
n01644900/n01644900_2281.JPEG 2
n01644900/n01644900_2329.JPEG 2
n01644900/n01644900_236.JPEG 2
n01644900/n01644900_2368.JPEG 2
n01644900/n01644900_2394.JPEG 2
n01644900/n01644900_24.JPEG 2
n01644900/n01644900_2421.JPEG 2
n01644900/n01644900_243.JPEG 2
n01644900/n01644900_2439.JPEG 2
n01644900/n01644900_2444.JPEG 2
n01644900/n01644900_2451.JPEG 2
n01644900/n01644900_2454.JPEG 2
n01644900/n01644900_2456.JPEG 2
n01644900/n01644900_2464.JPEG 2
n01644900/n01644900_247.JPEG 2
n01644900/n01644900_2478.JPEG 2
n01644900/n01644900_2488.JPEG 2
n01644900/n01644900_2542.JPEG 2
n01644900/n01644900_2553.JPEG 2
n01644900/n01644900_258.JPEG 2
n01644900/n01644900_2610.JPEG 2
n01644900/n01644900_2614.JPEG 2
n01644900/n01644900_2625.JPEG 2
n01644900/n01644900_2630.JPEG 2
n01644900/n01644900_2631.JPEG 2
n01644900/n01644900_2665.JPEG 2
n01644900/n01644900_267.JPEG 2
n01644900/n01644900_2671.JPEG 2
n01644900/n01644900_2672.JPEG 2
n01644900/n01644900_2677.JPEG 2
n01644900/n01644900_27.JPEG 2
n01644900/n01644900_2703.JPEG 2
n01644900/n01644900_2704.JPEG 2
n01644900/n01644900_2720.JPEG 2
n01644900/n01644900_2776.JPEG 2
n01644900/n01644900_2796.JPEG 2
n01644900/n01644900_2828.JPEG 2
n01644900/n01644900_2837.JPEG 2
n01644900/n01644900_2870.JPEG 2
n01644900/n01644900_2899.JPEG 2
n01644900/n01644900_29.JPEG 2
n01644900/n01644900_2902.JPEG 2
n01644900/n01644900_2916.JPEG 2
n01644900/n01644900_2920.JPEG 2
n01644900/n01644900_2922.JPEG 2
n01644900/n01644900_2939.JPEG 2
n01644900/n01644900_2952.JPEG 2
n01644900/n01644900_2959.JPEG 2
n01644900/n01644900_2976.JPEG 2
n01644900/n01644900_3015.JPEG 2
n01644900/n01644900_3020.JPEG 2
n01644900/n01644900_306.JPEG 2
n01644900/n01644900_3063.JPEG 2
n01644900/n01644900_3074.JPEG 2
n01644900/n01644900_3093.JPEG 2
n01644900/n01644900_3102.JPEG 2
n01644900/n01644900_3113.JPEG 2
n01644900/n01644900_3115.JPEG 2
n01644900/n01644900_3132.JPEG 2
n01644900/n01644900_3134.JPEG 2
n01644900/n01644900_3158.JPEG 2
n01644900/n01644900_3190.JPEG 2
n01644900/n01644900_3200.JPEG 2
n01644900/n01644900_3205.JPEG 2
n01644900/n01644900_3223.JPEG 2
n01644900/n01644900_3224.JPEG 2
n01644900/n01644900_3232.JPEG 2
n01644900/n01644900_3247.JPEG 2
n01644900/n01644900_3259.JPEG 2
n01644900/n01644900_3262.JPEG 2
n01644900/n01644900_3281.JPEG 2
n01644900/n01644900_3284.JPEG 2
n01644900/n01644900_3285.JPEG 2
n01644900/n01644900_3309.JPEG 2
n01644900/n01644900_332.JPEG 2
n01644900/n01644900_3346.JPEG 2
n01644900/n01644900_3357.JPEG 2
n01644900/n01644900_3384.JPEG 2
n01644900/n01644900_3388.JPEG 2
n01644900/n01644900_3389.JPEG 2
n01644900/n01644900_3395.JPEG 2
n01644900/n01644900_3494.JPEG 2
n01644900/n01644900_3500.JPEG 2
n01644900/n01644900_354.JPEG 2
n01644900/n01644900_3541.JPEG 2
n01644900/n01644900_3554.JPEG 2
n01644900/n01644900_3555.JPEG 2
n01644900/n01644900_3595.JPEG 2
n01644900/n01644900_3597.JPEG 2
n01644900/n01644900_3606.JPEG 2
n01644900/n01644900_3609.JPEG 2
n01644900/n01644900_3616.JPEG 2
n01644900/n01644900_3627.JPEG 2
n01644900/n01644900_3644.JPEG 2
n01644900/n01644900_3648.JPEG 2
n01644900/n01644900_3667.JPEG 2
n01644900/n01644900_3669.JPEG 2
n01644900/n01644900_3676.JPEG 2
n01644900/n01644900_3684.JPEG 2
n01644900/n01644900_369.JPEG 2
n01644900/n01644900_3715.JPEG 2
n01644900/n01644900_3720.JPEG 2
n01644900/n01644900_3770.JPEG 2
n01644900/n01644900_3771.JPEG 2
n01644900/n01644900_3785.JPEG 2
n01644900/n01644900_379.JPEG 2
n01644900/n01644900_381.JPEG 2
n01644900/n01644900_3817.JPEG 2
n01644900/n01644900_3833.JPEG 2
n01644900/n01644900_3834.JPEG 2
n01644900/n01644900_3850.JPEG 2
n01644900/n01644900_3890.JPEG 2
n01644900/n01644900_3911.JPEG 2
n01644900/n01644900_3917.JPEG 2
n01644900/n01644900_3934.JPEG 2
n01644900/n01644900_3944.JPEG 2
n01644900/n01644900_3983.JPEG 2
n01644900/n01644900_3991.JPEG 2
n01644900/n01644900_4004.JPEG 2
n01644900/n01644900_4011.JPEG 2
n01644900/n01644900_4014.JPEG 2
n01644900/n01644900_4030.JPEG 2
n01644900/n01644900_4035.JPEG 2
n01644900/n01644900_4040.JPEG 2
n01644900/n01644900_4051.JPEG 2
n01644900/n01644900_4054.JPEG 2
n01644900/n01644900_4055.JPEG 2
n01644900/n01644900_4065.JPEG 2
n01644900/n01644900_4117.JPEG 2
n01644900/n01644900_4118.JPEG 2
n01644900/n01644900_4125.JPEG 2
n01644900/n01644900_4133.JPEG 2
n01644900/n01644900_4134.JPEG 2
n01644900/n01644900_4137.JPEG 2
n01644900/n01644900_4138.JPEG 2
n01644900/n01644900_4139.JPEG 2
n01644900/n01644900_4176.JPEG 2
n01644900/n01644900_4185.JPEG 2
n01644900/n01644900_4195.JPEG 2
n01644900/n01644900_4198.JPEG 2
n01644900/n01644900_4225.JPEG 2
n01644900/n01644900_4229.JPEG 2
n01644900/n01644900_425.JPEG 2
n01644900/n01644900_4267.JPEG 2
n01644900/n01644900_4273.JPEG 2
n01644900/n01644900_4290.JPEG 2
n01644900/n01644900_434.JPEG 2
n01644900/n01644900_4342.JPEG 2
n01644900/n01644900_4344.JPEG 2
n01644900/n01644900_4384.JPEG 2
n01644900/n01644900_4386.JPEG 2
n01644900/n01644900_4389.JPEG 2
n01644900/n01644900_4394.JPEG 2
n01644900/n01644900_4426.JPEG 2
n01644900/n01644900_4435.JPEG 2
n01644900/n01644900_4452.JPEG 2
n01644900/n01644900_4455.JPEG 2
n01644900/n01644900_4482.JPEG 2
n01644900/n01644900_4508.JPEG 2
n01644900/n01644900_4510.JPEG 2
n01644900/n01644900_4520.JPEG 2
n01644900/n01644900_4522.JPEG 2
n01644900/n01644900_4565.JPEG 2
n01644900/n01644900_4598.JPEG 2
n01644900/n01644900_4611.JPEG 2
n01644900/n01644900_4617.JPEG 2
n01644900/n01644900_4627.JPEG 2
n01644900/n01644900_4665.JPEG 2
n01644900/n01644900_4668.JPEG 2
n01644900/n01644900_4671.JPEG 2
n01644900/n01644900_4696.JPEG 2
n01644900/n01644900_4704.JPEG 2
n01644900/n01644900_4731.JPEG 2
n01644900/n01644900_4733.JPEG 2
n01644900/n01644900_4738.JPEG 2
n01644900/n01644900_4773.JPEG 2
n01644900/n01644900_4786.JPEG 2
n01644900/n01644900_479.JPEG 2
n01644900/n01644900_48.JPEG 2
n01644900/n01644900_4827.JPEG 2
n01644900/n01644900_4834.JPEG 2
n01644900/n01644900_4840.JPEG 2
n01644900/n01644900_4858.JPEG 2
n01644900/n01644900_488.JPEG 2
n01644900/n01644900_4884.JPEG 2
n01644900/n01644900_4892.JPEG 2
n01644900/n01644900_4893.JPEG 2
n01644900/n01644900_4909.JPEG 2
n01644900/n01644900_4929.JPEG 2
n01644900/n01644900_4940.JPEG 2
n01644900/n01644900_4945.JPEG 2
n01644900/n01644900_4958.JPEG 2
n01644900/n01644900_4960.JPEG 2
n01644900/n01644900_4974.JPEG 2
n01644900/n01644900_4980.JPEG 2
n01644900/n01644900_4981.JPEG 2
n01644900/n01644900_5.JPEG 2
n01644900/n01644900_5013.JPEG 2
n01644900/n01644900_5030.JPEG 2
n01644900/n01644900_5036.JPEG 2
n01644900/n01644900_5066.JPEG 2
n01644900/n01644900_5073.JPEG 2
n01644900/n01644900_5074.JPEG 2
n01644900/n01644900_5086.JPEG 2
n01644900/n01644900_5105.JPEG 2
n01644900/n01644900_5124.JPEG 2
n01644900/n01644900_5137.JPEG 2
n01644900/n01644900_5151.JPEG 2
n01644900/n01644900_516.JPEG 2
n01644900/n01644900_5190.JPEG 2
n01644900/n01644900_5194.JPEG 2
n01644900/n01644900_5199.JPEG 2
n01644900/n01644900_5217.JPEG 2
n01644900/n01644900_5226.JPEG 2
n01644900/n01644900_5237.JPEG 2
n01644900/n01644900_5239.JPEG 2
n01644900/n01644900_5249.JPEG 2
n01644900/n01644900_5280.JPEG 2
n01644900/n01644900_531.JPEG 2
n01644900/n01644900_5311.JPEG 2
n01644900/n01644900_5331.JPEG 2
n01644900/n01644900_5335.JPEG 2
n01644900/n01644900_5350.JPEG 2
n01644900/n01644900_5358.JPEG 2
n01644900/n01644900_5362.JPEG 2
n01644900/n01644900_5374.JPEG 2
n01644900/n01644900_5383.JPEG 2
n01644900/n01644900_5397.JPEG 2
n01644900/n01644900_5405.JPEG 2
n01644900/n01644900_542.JPEG 2
n01644900/n01644900_5421.JPEG 2
n01644900/n01644900_5424.JPEG 2
n01644900/n01644900_5425.JPEG 2
n01644900/n01644900_5427.JPEG 2
n01644900/n01644900_5455.JPEG 2
n01644900/n01644900_5460.JPEG 2
n01644900/n01644900_5463.JPEG 2
n01644900/n01644900_5485.JPEG 2
n01644900/n01644900_5492.JPEG 2
n01644900/n01644900_5493.JPEG 2
n01644900/n01644900_55.JPEG 2
n01644900/n01644900_553.JPEG 2
n01644900/n01644900_5546.JPEG 2
n01644900/n01644900_5550.JPEG 2
n01644900/n01644900_5552.JPEG 2
n01644900/n01644900_5553.JPEG 2
n01644900/n01644900_5562.JPEG 2
n01644900/n01644900_5568.JPEG 2
n01644900/n01644900_5569.JPEG 2
n01644900/n01644900_5572.JPEG 2
n01644900/n01644900_5579.JPEG 2
n01644900/n01644900_5599.JPEG 2
n01644900/n01644900_562.JPEG 2
n01644900/n01644900_5621.JPEG 2
n01644900/n01644900_5647.JPEG 2
n01644900/n01644900_5649.JPEG 2
n01644900/n01644900_5650.JPEG 2
n01644900/n01644900_5657.JPEG 2
n01644900/n01644900_5660.JPEG 2
n01644900/n01644900_5662.JPEG 2
n01644900/n01644900_5665.JPEG 2
n01644900/n01644900_5669.JPEG 2
n01644900/n01644900_5670.JPEG 2
n01644900/n01644900_5697.JPEG 2
n01644900/n01644900_5711.JPEG 2
n01644900/n01644900_5712.JPEG 2
n01644900/n01644900_5714.JPEG 2
n01644900/n01644900_5740.JPEG 2
n01644900/n01644900_5741.JPEG 2
n01644900/n01644900_5744.JPEG 2
n01644900/n01644900_5748.JPEG 2
n01644900/n01644900_5758.JPEG 2
n01644900/n01644900_5768.JPEG 2
n01644900/n01644900_5774.JPEG 2
n01644900/n01644900_5796.JPEG 2
n01644900/n01644900_5812.JPEG 2
n01644900/n01644900_5815.JPEG 2
n01644900/n01644900_582.JPEG 2
n01644900/n01644900_5828.JPEG 2
n01644900/n01644900_5836.JPEG 2
n01644900/n01644900_5869.JPEG 2
n01644900/n01644900_5891.JPEG 2
n01644900/n01644900_5894.JPEG 2
n01644900/n01644900_591.JPEG 2
n01644900/n01644900_5942.JPEG 2
n01644900/n01644900_5958.JPEG 2
n01644900/n01644900_5963.JPEG 2
n01644900/n01644900_5986.JPEG 2
n01644900/n01644900_5991.JPEG 2
n01644900/n01644900_6016.JPEG 2
n01644900/n01644900_6090.JPEG 2
n01644900/n01644900_6094.JPEG 2
n01644900/n01644900_61.JPEG 2
n01644900/n01644900_6173.JPEG 2
n01644900/n01644900_6183.JPEG 2
n01644900/n01644900_6196.JPEG 2
n01644900/n01644900_6226.JPEG 2
n01644900/n01644900_6229.JPEG 2
n01644900/n01644900_6234.JPEG 2
n01644900/n01644900_6243.JPEG 2
n01644900/n01644900_6256.JPEG 2
n01644900/n01644900_628.JPEG 2
n01644900/n01644900_6280.JPEG 2
n01644900/n01644900_6294.JPEG 2
n01644900/n01644900_6306.JPEG 2
n01644900/n01644900_6314.JPEG 2
n01644900/n01644900_6324.JPEG 2
n01644900/n01644900_6337.JPEG 2
n01644900/n01644900_6345.JPEG 2
n01644900/n01644900_6397.JPEG 2
n01644900/n01644900_6417.JPEG 2
n01644900/n01644900_6428.JPEG 2
n01644900/n01644900_6451.JPEG 2
n01644900/n01644900_6491.JPEG 2
n01644900/n01644900_6497.JPEG 2
n01644900/n01644900_6498.JPEG 2
n01644900/n01644900_6501.JPEG 2
n01644900/n01644900_651.JPEG 2
n01644900/n01644900_6515.JPEG 2
n01644900/n01644900_659.JPEG 2
n01644900/n01644900_6598.JPEG 2
n01644900/n01644900_6603.JPEG 2
n01644900/n01644900_6622.JPEG 2
n01644900/n01644900_6623.JPEG 2
n01644900/n01644900_6638.JPEG 2
n01644900/n01644900_6643.JPEG 2
n01644900/n01644900_665.JPEG 2
n01644900/n01644900_6657.JPEG 2
n01644900/n01644900_6666.JPEG 2
n01644900/n01644900_6671.JPEG 2
n01644900/n01644900_6677.JPEG 2
n01644900/n01644900_6696.JPEG 2
n01644900/n01644900_6702.JPEG 2
n01644900/n01644900_6728.JPEG 2
n01644900/n01644900_6745.JPEG 2
n01644900/n01644900_6757.JPEG 2
n01644900/n01644900_6764.JPEG 2
n01644900/n01644900_6781.JPEG 2
n01644900/n01644900_6783.JPEG 2
n01644900/n01644900_6826.JPEG 2
n01644900/n01644900_6832.JPEG 2
n01644900/n01644900_6837.JPEG 2
n01644900/n01644900_6838.JPEG 2
n01644900/n01644900_6839.JPEG 2
n01644900/n01644900_6840.JPEG 2
n01644900/n01644900_6844.JPEG 2
n01644900/n01644900_6848.JPEG 2
n01644900/n01644900_6856.JPEG 2
n01644900/n01644900_6870.JPEG 2
n01644900/n01644900_6882.JPEG 2
n01644900/n01644900_6895.JPEG 2
n01644900/n01644900_6896.JPEG 2
n01644900/n01644900_6919.JPEG 2
n01644900/n01644900_6967.JPEG 2
n01644900/n01644900_7000.JPEG 2
n01644900/n01644900_7001.JPEG 2
n01644900/n01644900_7041.JPEG 2
n01644900/n01644900_7054.JPEG 2
n01644900/n01644900_7055.JPEG 2
n01644900/n01644900_7060.JPEG 2
n01644900/n01644900_7064.JPEG 2
n01644900/n01644900_7086.JPEG 2
n01644900/n01644900_709.JPEG 2
n01644900/n01644900_71.JPEG 2
n01644900/n01644900_7103.JPEG 2
n01644900/n01644900_7110.JPEG 2
n01644900/n01644900_7118.JPEG 2
n01644900/n01644900_7127.JPEG 2
n01644900/n01644900_7137.JPEG 2
n01644900/n01644900_7149.JPEG 2
n01644900/n01644900_7151.JPEG 2
n01644900/n01644900_7155.JPEG 2
n01644900/n01644900_716.JPEG 2
n01644900/n01644900_7171.JPEG 2
n01644900/n01644900_7178.JPEG 2
n01644900/n01644900_7240.JPEG 2
n01644900/n01644900_7242.JPEG 2
n01644900/n01644900_727.JPEG 2
n01644900/n01644900_7313.JPEG 2
n01644900/n01644900_7348.JPEG 2
n01644900/n01644900_7383.JPEG 2
n01644900/n01644900_7385.JPEG 2
n01644900/n01644900_7389.JPEG 2
n01644900/n01644900_739.JPEG 2
n01644900/n01644900_7393.JPEG 2
n01644900/n01644900_7400.JPEG 2
n01644900/n01644900_7409.JPEG 2
n01644900/n01644900_7425.JPEG 2
n01644900/n01644900_744.JPEG 2
n01644900/n01644900_7444.JPEG 2
n01644900/n01644900_745.JPEG 2
n01644900/n01644900_7480.JPEG 2
n01644900/n01644900_7484.JPEG 2
n01644900/n01644900_7503.JPEG 2
n01644900/n01644900_7517.JPEG 2
n01644900/n01644900_7528.JPEG 2
n01644900/n01644900_7529.JPEG 2
n01644900/n01644900_7534.JPEG 2
n01644900/n01644900_755.JPEG 2
n01644900/n01644900_7552.JPEG 2
n01644900/n01644900_7558.JPEG 2
n01644900/n01644900_7593.JPEG 2
n01644900/n01644900_7599.JPEG 2
n01644900/n01644900_7607.JPEG 2
n01644900/n01644900_761.JPEG 2
n01644900/n01644900_7621.JPEG 2
n01644900/n01644900_7632.JPEG 2
n01644900/n01644900_7653.JPEG 2
n01644900/n01644900_7675.JPEG 2
n01644900/n01644900_7678.JPEG 2
n01644900/n01644900_7683.JPEG 2
n01644900/n01644900_7710.JPEG 2
n01644900/n01644900_7738.JPEG 2
n01644900/n01644900_7759.JPEG 2
n01644900/n01644900_7763.JPEG 2
n01644900/n01644900_7793.JPEG 2
n01644900/n01644900_7806.JPEG 2
n01644900/n01644900_7815.JPEG 2
n01644900/n01644900_7828.JPEG 2
n01644900/n01644900_7850.JPEG 2
n01644900/n01644900_7861.JPEG 2
n01644900/n01644900_7868.JPEG 2
n01644900/n01644900_7871.JPEG 2
n01644900/n01644900_789.JPEG 2
n01644900/n01644900_7901.JPEG 2
n01644900/n01644900_7903.JPEG 2
n01644900/n01644900_7925.JPEG 2
n01644900/n01644900_7934.JPEG 2
n01644900/n01644900_7938.JPEG 2
n01644900/n01644900_80.JPEG 2
n01644900/n01644900_8029.JPEG 2
n01644900/n01644900_8031.JPEG 2
n01644900/n01644900_8035.JPEG 2
n01644900/n01644900_8048.JPEG 2
n01644900/n01644900_8060.JPEG 2
n01644900/n01644900_8070.JPEG 2
n01644900/n01644900_8078.JPEG 2
n01644900/n01644900_8117.JPEG 2
n01644900/n01644900_8122.JPEG 2
n01644900/n01644900_8153.JPEG 2
n01644900/n01644900_8167.JPEG 2
n01644900/n01644900_8191.JPEG 2
n01644900/n01644900_8198.JPEG 2
n01644900/n01644900_822.JPEG 2
n01644900/n01644900_8229.JPEG 2
n01644900/n01644900_8231.JPEG 2
n01644900/n01644900_8245.JPEG 2
n01644900/n01644900_8253.JPEG 2
n01644900/n01644900_8266.JPEG 2
n01644900/n01644900_8271.JPEG 2
n01644900/n01644900_8280.JPEG 2
n01644900/n01644900_8309.JPEG 2
n01644900/n01644900_8326.JPEG 2
n01644900/n01644900_8340.JPEG 2
n01644900/n01644900_8345.JPEG 2
n01644900/n01644900_8370.JPEG 2
n01644900/n01644900_8386.JPEG 2
n01644900/n01644900_8403.JPEG 2
n01644900/n01644900_8404.JPEG 2
n01644900/n01644900_841.JPEG 2
n01644900/n01644900_8415.JPEG 2
n01644900/n01644900_8423.JPEG 2
n01644900/n01644900_8427.JPEG 2
n01644900/n01644900_8457.JPEG 2
n01644900/n01644900_8460.JPEG 2
n01644900/n01644900_8467.JPEG 2
n01644900/n01644900_8523.JPEG 2
n01644900/n01644900_8528.JPEG 2
n01644900/n01644900_8530.JPEG 2
n01644900/n01644900_8552.JPEG 2
n01644900/n01644900_8553.JPEG 2
n01644900/n01644900_858.JPEG 2
n01644900/n01644900_8589.JPEG 2
n01644900/n01644900_8617.JPEG 2
n01644900/n01644900_8625.JPEG 2
n01644900/n01644900_8631.JPEG 2
n01644900/n01644900_8638.JPEG 2
n01644900/n01644900_8641.JPEG 2
n01644900/n01644900_8642.JPEG 2
n01644900/n01644900_865.JPEG 2
n01644900/n01644900_8653.JPEG 2
n01644900/n01644900_8671.JPEG 2
n01644900/n01644900_8674.JPEG 2
n01644900/n01644900_8694.JPEG 2
n01644900/n01644900_8695.JPEG 2
n01644900/n01644900_8698.JPEG 2
n01644900/n01644900_8699.JPEG 2
n01644900/n01644900_8700.JPEG 2
n01644900/n01644900_8706.JPEG 2
n01644900/n01644900_8731.JPEG 2
n01644900/n01644900_8751.JPEG 2
n01644900/n01644900_8772.JPEG 2
n01644900/n01644900_8784.JPEG 2
n01644900/n01644900_8806.JPEG 2
n01644900/n01644900_8809.JPEG 2
n01644900/n01644900_8828.JPEG 2
n01644900/n01644900_8836.JPEG 2
n01644900/n01644900_8850.JPEG 2
n01644900/n01644900_8852.JPEG 2
n01644900/n01644900_8888.JPEG 2
n01644900/n01644900_8901.JPEG 2
n01644900/n01644900_8905.JPEG 2
n01644900/n01644900_8933.JPEG 2
n01644900/n01644900_8945.JPEG 2
n01644900/n01644900_8947.JPEG 2
n01644900/n01644900_8982.JPEG 2
n01644900/n01644900_8990.JPEG 2
n01644900/n01644900_9012.JPEG 2
n01644900/n01644900_9027.JPEG 2
n01644900/n01644900_903.JPEG 2
n01644900/n01644900_9031.JPEG 2
n01644900/n01644900_9041.JPEG 2
n01644900/n01644900_9050.JPEG 2
n01644900/n01644900_9068.JPEG 2
n01644900/n01644900_9070.JPEG 2
n01644900/n01644900_9087.JPEG 2
n01644900/n01644900_9088.JPEG 2
n01644900/n01644900_909.JPEG 2
n01644900/n01644900_91.JPEG 2
n01644900/n01644900_9121.JPEG 2
n01644900/n01644900_9128.JPEG 2
n01644900/n01644900_9130.JPEG 2
n01644900/n01644900_9131.JPEG 2
n01644900/n01644900_9151.JPEG 2
n01644900/n01644900_9162.JPEG 2
n01644900/n01644900_9167.JPEG 2
n01644900/n01644900_9169.JPEG 2
n01644900/n01644900_9182.JPEG 2
n01644900/n01644900_920.JPEG 2
n01644900/n01644900_9202.JPEG 2
n01644900/n01644900_9205.JPEG 2
n01644900/n01644900_9216.JPEG 2
n01644900/n01644900_922.JPEG 2
n01644900/n01644900_9224.JPEG 2
n01644900/n01644900_9229.JPEG 2
n01644900/n01644900_9243.JPEG 2
n01644900/n01644900_9256.JPEG 2
n01644900/n01644900_9271.JPEG 2
n01644900/n01644900_9288.JPEG 2
n01644900/n01644900_9289.JPEG 2
n01644900/n01644900_9300.JPEG 2
n01644900/n01644900_9306.JPEG 2
n01644900/n01644900_931.JPEG 2
n01644900/n01644900_9360.JPEG 2
n01644900/n01644900_9365.JPEG 2
n01644900/n01644900_9394.JPEG 2
n01644900/n01644900_9395.JPEG 2
n01644900/n01644900_9399.JPEG 2
n01644900/n01644900_9403.JPEG 2
n01644900/n01644900_9445.JPEG 2
n01644900/n01644900_9460.JPEG 2
n01644900/n01644900_9480.JPEG 2
n01644900/n01644900_9483.JPEG 2
n01644900/n01644900_9502.JPEG 2
n01644900/n01644900_9518.JPEG 2
n01644900/n01644900_9576.JPEG 2
n01644900/n01644900_9592.JPEG 2
n01644900/n01644900_9601.JPEG 2
n01644900/n01644900_9602.JPEG 2
n01644900/n01644900_9604.JPEG 2
n01644900/n01644900_965.JPEG 2
n01644900/n01644900_9658.JPEG 2
n01644900/n01644900_9674.JPEG 2
n01644900/n01644900_9676.JPEG 2
n01644900/n01644900_9680.JPEG 2
n01644900/n01644900_9688.JPEG 2
n01644900/n01644900_9708.JPEG 2
n01644900/n01644900_9709.JPEG 2
n01644900/n01644900_9731.JPEG 2
n01644900/n01644900_9751.JPEG 2
n01644900/n01644900_9761.JPEG 2
n01644900/n01644900_9773.JPEG 2
n01644900/n01644900_9776.JPEG 2
n01644900/n01644900_9803.JPEG 2
n01644900/n01644900_9839.JPEG 2
n01644900/n01644900_9861.JPEG 2
n01644900/n01644900_9961.JPEG 2
n01664065/n01664065_10044.JPEG 3
n01664065/n01664065_10053.JPEG 3
n01664065/n01664065_10075.JPEG 3
n01664065/n01664065_10088.JPEG 3
n01664065/n01664065_10096.JPEG 3
n01664065/n01664065_10099.JPEG 3
n01664065/n01664065_101.JPEG 3
n01664065/n01664065_10103.JPEG 3
n01664065/n01664065_10163.JPEG 3
n01664065/n01664065_10181.JPEG 3
n01664065/n01664065_10183.JPEG 3
n01664065/n01664065_10187.JPEG 3
n01664065/n01664065_10199.JPEG 3
n01664065/n01664065_10214.JPEG 3
n01664065/n01664065_10220.JPEG 3
n01664065/n01664065_10226.JPEG 3
n01664065/n01664065_10238.JPEG 3
n01664065/n01664065_1024.JPEG 3
n01664065/n01664065_10258.JPEG 3
n01664065/n01664065_10285.JPEG 3
n01664065/n01664065_10286.JPEG 3
n01664065/n01664065_10305.JPEG 3
n01664065/n01664065_10325.JPEG 3
n01664065/n01664065_10340.JPEG 3
n01664065/n01664065_10354.JPEG 3
n01664065/n01664065_10359.JPEG 3
n01664065/n01664065_10372.JPEG 3
n01664065/n01664065_10373.JPEG 3
n01664065/n01664065_10387.JPEG 3
n01664065/n01664065_10389.JPEG 3
n01664065/n01664065_10395.JPEG 3
n01664065/n01664065_10398.JPEG 3
n01664065/n01664065_10431.JPEG 3
n01664065/n01664065_10446.JPEG 3
n01664065/n01664065_10500.JPEG 3
n01664065/n01664065_10569.JPEG 3
n01664065/n01664065_10572.JPEG 3
n01664065/n01664065_10597.JPEG 3
n01664065/n01664065_10613.JPEG 3
n01664065/n01664065_10616.JPEG 3
n01664065/n01664065_10625.JPEG 3
n01664065/n01664065_10638.JPEG 3
n01664065/n01664065_1064.JPEG 3
n01664065/n01664065_10683.JPEG 3
n01664065/n01664065_10710.JPEG 3
n01664065/n01664065_10726.JPEG 3
n01664065/n01664065_1076.JPEG 3
n01664065/n01664065_10763.JPEG 3
n01664065/n01664065_10784.JPEG 3
n01664065/n01664065_10788.JPEG 3
n01664065/n01664065_10869.JPEG 3
n01664065/n01664065_10873.JPEG 3
n01664065/n01664065_10905.JPEG 3
n01664065/n01664065_10910.JPEG 3
n01664065/n01664065_10911.JPEG 3
n01664065/n01664065_10950.JPEG 3
n01664065/n01664065_10956.JPEG 3
n01664065/n01664065_10979.JPEG 3
n01664065/n01664065_10982.JPEG 3
n01664065/n01664065_10985.JPEG 3
n01664065/n01664065_10987.JPEG 3
n01664065/n01664065_1099.JPEG 3
n01664065/n01664065_1105.JPEG 3
n01664065/n01664065_11058.JPEG 3
n01664065/n01664065_11064.JPEG 3
n01664065/n01664065_11107.JPEG 3
n01664065/n01664065_11131.JPEG 3
n01664065/n01664065_11158.JPEG 3
n01664065/n01664065_11199.JPEG 3
n01664065/n01664065_11277.JPEG 3
n01664065/n01664065_11288.JPEG 3
n01664065/n01664065_11293.JPEG 3
n01664065/n01664065_1130.JPEG 3
n01664065/n01664065_11301.JPEG 3
n01664065/n01664065_11304.JPEG 3
n01664065/n01664065_11315.JPEG 3
n01664065/n01664065_11318.JPEG 3
n01664065/n01664065_1132.JPEG 3
n01664065/n01664065_11360.JPEG 3
n01664065/n01664065_11375.JPEG 3
n01664065/n01664065_11390.JPEG 3
n01664065/n01664065_11399.JPEG 3
n01664065/n01664065_11424.JPEG 3
n01664065/n01664065_11429.JPEG 3
n01664065/n01664065_11434.JPEG 3
n01664065/n01664065_11446.JPEG 3
n01664065/n01664065_11459.JPEG 3
n01664065/n01664065_11515.JPEG 3
n01664065/n01664065_11526.JPEG 3
n01664065/n01664065_1153.JPEG 3
n01664065/n01664065_11532.JPEG 3
n01664065/n01664065_11544.JPEG 3
n01664065/n01664065_11562.JPEG 3
n01664065/n01664065_11570.JPEG 3
n01664065/n01664065_11629.JPEG 3
n01664065/n01664065_1164.JPEG 3
n01664065/n01664065_11705.JPEG 3
n01664065/n01664065_11726.JPEG 3
n01664065/n01664065_11746.JPEG 3
n01664065/n01664065_11748.JPEG 3
n01664065/n01664065_11822.JPEG 3
n01664065/n01664065_11837.JPEG 3
n01664065/n01664065_11838.JPEG 3
n01664065/n01664065_11851.JPEG 3
n01664065/n01664065_1188.JPEG 3
n01664065/n01664065_11892.JPEG 3
n01664065/n01664065_11912.JPEG 3
n01664065/n01664065_11915.JPEG 3
n01664065/n01664065_1194.JPEG 3
n01664065/n01664065_11945.JPEG 3
n01664065/n01664065_11970.JPEG 3
n01664065/n01664065_11981.JPEG 3
n01664065/n01664065_11986.JPEG 3
n01664065/n01664065_1207.JPEG 3
n01664065/n01664065_12075.JPEG 3
n01664065/n01664065_12122.JPEG 3
n01664065/n01664065_12232.JPEG 3
n01664065/n01664065_12247.JPEG 3
n01664065/n01664065_1228.JPEG 3
n01664065/n01664065_1229.JPEG 3
n01664065/n01664065_12298.JPEG 3
n01664065/n01664065_1232.JPEG 3
n01664065/n01664065_12330.JPEG 3
n01664065/n01664065_12356.JPEG 3
n01664065/n01664065_12357.JPEG 3
n01664065/n01664065_12374.JPEG 3
n01664065/n01664065_12382.JPEG 3
n01664065/n01664065_12383.JPEG 3
n01664065/n01664065_12386.JPEG 3
n01664065/n01664065_12397.JPEG 3
n01664065/n01664065_12411.JPEG 3
n01664065/n01664065_12422.JPEG 3
n01664065/n01664065_1243.JPEG 3
n01664065/n01664065_12458.JPEG 3
n01664065/n01664065_12481.JPEG 3
n01664065/n01664065_12501.JPEG 3
n01664065/n01664065_12510.JPEG 3
n01664065/n01664065_12548.JPEG 3
n01664065/n01664065_12563.JPEG 3
n01664065/n01664065_1257.JPEG 3
n01664065/n01664065_12612.JPEG 3
n01664065/n01664065_12616.JPEG 3
n01664065/n01664065_12633.JPEG 3
n01664065/n01664065_12641.JPEG 3
n01664065/n01664065_12663.JPEG 3
n01664065/n01664065_12664.JPEG 3
n01664065/n01664065_12708.JPEG 3
n01664065/n01664065_12709.JPEG 3
n01664065/n01664065_12711.JPEG 3
n01664065/n01664065_12759.JPEG 3
n01664065/n01664065_12767.JPEG 3
n01664065/n01664065_12810.JPEG 3
n01664065/n01664065_12835.JPEG 3
n01664065/n01664065_12844.JPEG 3
n01664065/n01664065_12929.JPEG 3
n01664065/n01664065_12948.JPEG 3
n01664065/n01664065_12963.JPEG 3
n01664065/n01664065_13000.JPEG 3
n01664065/n01664065_13004.JPEG 3
n01664065/n01664065_13012.JPEG 3
n01664065/n01664065_1302.JPEG 3
n01664065/n01664065_13024.JPEG 3
n01664065/n01664065_13030.JPEG 3
n01664065/n01664065_13062.JPEG 3
n01664065/n01664065_13093.JPEG 3
n01664065/n01664065_13109.JPEG 3
n01664065/n01664065_13117.JPEG 3
n01664065/n01664065_13249.JPEG 3
n01664065/n01664065_13257.JPEG 3
n01664065/n01664065_13289.JPEG 3
n01664065/n01664065_13313.JPEG 3
n01664065/n01664065_13317.JPEG 3
n01664065/n01664065_13334.JPEG 3
n01664065/n01664065_13376.JPEG 3
n01664065/n01664065_13430.JPEG 3
n01664065/n01664065_13432.JPEG 3
n01664065/n01664065_13471.JPEG 3
n01664065/n01664065_13506.JPEG 3
n01664065/n01664065_13532.JPEG 3
n01664065/n01664065_13552.JPEG 3
n01664065/n01664065_13629.JPEG 3
n01664065/n01664065_13635.JPEG 3
n01664065/n01664065_13643.JPEG 3
n01664065/n01664065_13648.JPEG 3
n01664065/n01664065_13677.JPEG 3
n01664065/n01664065_13678.JPEG 3
n01664065/n01664065_1371.JPEG 3
n01664065/n01664065_13714.JPEG 3
n01664065/n01664065_13720.JPEG 3
n01664065/n01664065_13731.JPEG 3
n01664065/n01664065_1376.JPEG 3
n01664065/n01664065_13773.JPEG 3
n01664065/n01664065_13782.JPEG 3
n01664065/n01664065_13804.JPEG 3
n01664065/n01664065_13817.JPEG 3
n01664065/n01664065_13826.JPEG 3
n01664065/n01664065_13827.JPEG 3
n01664065/n01664065_13844.JPEG 3
n01664065/n01664065_13902.JPEG 3
n01664065/n01664065_13965.JPEG 3
n01664065/n01664065_13974.JPEG 3
n01664065/n01664065_13987.JPEG 3
n01664065/n01664065_13988.JPEG 3
n01664065/n01664065_14031.JPEG 3
n01664065/n01664065_14045.JPEG 3
n01664065/n01664065_14050.JPEG 3
n01664065/n01664065_14066.JPEG 3
n01664065/n01664065_14083.JPEG 3
n01664065/n01664065_14100.JPEG 3
n01664065/n01664065_1411.JPEG 3
n01664065/n01664065_14141.JPEG 3
n01664065/n01664065_14142.JPEG 3
n01664065/n01664065_14182.JPEG 3
n01664065/n01664065_14185.JPEG 3
n01664065/n01664065_1420.JPEG 3
n01664065/n01664065_14253.JPEG 3
n01664065/n01664065_14263.JPEG 3
n01664065/n01664065_14308.JPEG 3
n01664065/n01664065_14320.JPEG 3
n01664065/n01664065_14348.JPEG 3
n01664065/n01664065_14380.JPEG 3
n01664065/n01664065_14400.JPEG 3
n01664065/n01664065_14404.JPEG 3
n01664065/n01664065_14415.JPEG 3
n01664065/n01664065_14459.JPEG 3
n01664065/n01664065_1446.JPEG 3
n01664065/n01664065_14477.JPEG 3
n01664065/n01664065_14484.JPEG 3
n01664065/n01664065_1452.JPEG 3
n01664065/n01664065_14563.JPEG 3
n01664065/n01664065_14622.JPEG 3
n01664065/n01664065_14629.JPEG 3
n01664065/n01664065_14659.JPEG 3
n01664065/n01664065_14698.JPEG 3
n01664065/n01664065_14716.JPEG 3
n01664065/n01664065_14730.JPEG 3
n01664065/n01664065_14756.JPEG 3
n01664065/n01664065_14786.JPEG 3
n01664065/n01664065_14798.JPEG 3
n01664065/n01664065_148.JPEG 3
n01664065/n01664065_14810.JPEG 3
n01664065/n01664065_14814.JPEG 3
n01664065/n01664065_14823.JPEG 3
n01664065/n01664065_1485.JPEG 3
n01664065/n01664065_14877.JPEG 3
n01664065/n01664065_14901.JPEG 3
n01664065/n01664065_14938.JPEG 3
n01664065/n01664065_14975.JPEG 3
n01664065/n01664065_14993.JPEG 3
n01664065/n01664065_15018.JPEG 3
n01664065/n01664065_15024.JPEG 3
n01664065/n01664065_1503.JPEG 3
n01664065/n01664065_15082.JPEG 3
n01664065/n01664065_15103.JPEG 3
n01664065/n01664065_15104.JPEG 3
n01664065/n01664065_15109.JPEG 3
n01664065/n01664065_15153.JPEG 3
n01664065/n01664065_1518.JPEG 3
n01664065/n01664065_15187.JPEG 3
n01664065/n01664065_15277.JPEG 3
n01664065/n01664065_1529.JPEG 3
n01664065/n01664065_15368.JPEG 3
n01664065/n01664065_15383.JPEG 3
n01664065/n01664065_15384.JPEG 3
n01664065/n01664065_15399.JPEG 3
n01664065/n01664065_15488.JPEG 3
n01664065/n01664065_15506.JPEG 3
n01664065/n01664065_15511.JPEG 3
n01664065/n01664065_15521.JPEG 3
n01664065/n01664065_15532.JPEG 3
n01664065/n01664065_15542.JPEG 3
n01664065/n01664065_15550.JPEG 3
n01664065/n01664065_15562.JPEG 3
n01664065/n01664065_15571.JPEG 3
n01664065/n01664065_15586.JPEG 3
n01664065/n01664065_1564.JPEG 3
n01664065/n01664065_15662.JPEG 3
n01664065/n01664065_15666.JPEG 3
n01664065/n01664065_15693.JPEG 3
n01664065/n01664065_15696.JPEG 3
n01664065/n01664065_15698.JPEG 3
n01664065/n01664065_15785.JPEG 3
n01664065/n01664065_1583.JPEG 3
n01664065/n01664065_15841.JPEG 3
n01664065/n01664065_15871.JPEG 3
n01664065/n01664065_15893.JPEG 3
n01664065/n01664065_15922.JPEG 3
n01664065/n01664065_15929.JPEG 3
n01664065/n01664065_15936.JPEG 3
n01664065/n01664065_15939.JPEG 3
n01664065/n01664065_16002.JPEG 3
n01664065/n01664065_16003.JPEG 3
n01664065/n01664065_16010.JPEG 3
n01664065/n01664065_16021.JPEG 3
n01664065/n01664065_16036.JPEG 3
n01664065/n01664065_16041.JPEG 3
n01664065/n01664065_16069.JPEG 3
n01664065/n01664065_16120.JPEG 3
n01664065/n01664065_1614.JPEG 3
n01664065/n01664065_16150.JPEG 3
n01664065/n01664065_1616.JPEG 3
n01664065/n01664065_16167.JPEG 3
n01664065/n01664065_16223.JPEG 3
n01664065/n01664065_16263.JPEG 3
n01664065/n01664065_16275.JPEG 3
n01664065/n01664065_16277.JPEG 3
n01664065/n01664065_16287.JPEG 3
n01664065/n01664065_16320.JPEG 3
n01664065/n01664065_16384.JPEG 3
n01664065/n01664065_16393.JPEG 3
n01664065/n01664065_16423.JPEG 3
n01664065/n01664065_16476.JPEG 3
n01664065/n01664065_16537.JPEG 3
n01664065/n01664065_16565.JPEG 3
n01664065/n01664065_16582.JPEG 3
n01664065/n01664065_16598.JPEG 3
n01664065/n01664065_16659.JPEG 3
n01664065/n01664065_16661.JPEG 3
n01664065/n01664065_16663.JPEG 3
n01664065/n01664065_16667.JPEG 3
n01664065/n01664065_16671.JPEG 3
n01664065/n01664065_16685.JPEG 3
n01664065/n01664065_16693.JPEG 3
n01664065/n01664065_16705.JPEG 3
n01664065/n01664065_16714.JPEG 3
n01664065/n01664065_16757.JPEG 3
n01664065/n01664065_16770.JPEG 3
n01664065/n01664065_16791.JPEG 3
n01664065/n01664065_16813.JPEG 3
n01664065/n01664065_16819.JPEG 3
n01664065/n01664065_16868.JPEG 3
n01664065/n01664065_16880.JPEG 3
n01664065/n01664065_16882.JPEG 3
n01664065/n01664065_16886.JPEG 3
n01664065/n01664065_16938.JPEG 3
n01664065/n01664065_16970.JPEG 3
n01664065/n01664065_1705.JPEG 3
n01664065/n01664065_17063.JPEG 3
n01664065/n01664065_1707.JPEG 3
n01664065/n01664065_17113.JPEG 3
n01664065/n01664065_17136.JPEG 3
n01664065/n01664065_17143.JPEG 3
n01664065/n01664065_1715.JPEG 3
n01664065/n01664065_1718.JPEG 3
n01664065/n01664065_17188.JPEG 3
n01664065/n01664065_17326.JPEG 3
n01664065/n01664065_17356.JPEG 3
n01664065/n01664065_17422.JPEG 3
n01664065/n01664065_17447.JPEG 3
n01664065/n01664065_17492.JPEG 3
n01664065/n01664065_1750.JPEG 3
n01664065/n01664065_17558.JPEG 3
n01664065/n01664065_17567.JPEG 3
n01664065/n01664065_17579.JPEG 3
n01664065/n01664065_17605.JPEG 3
n01664065/n01664065_17613.JPEG 3
n01664065/n01664065_17617.JPEG 3
n01664065/n01664065_17627.JPEG 3
n01664065/n01664065_17646.JPEG 3
n01664065/n01664065_17648.JPEG 3
n01664065/n01664065_17656.JPEG 3
n01664065/n01664065_17661.JPEG 3
n01664065/n01664065_17675.JPEG 3
n01664065/n01664065_1769.JPEG 3
n01664065/n01664065_17710.JPEG 3
n01664065/n01664065_17735.JPEG 3
n01664065/n01664065_17752.JPEG 3
n01664065/n01664065_17760.JPEG 3
n01664065/n01664065_17770.JPEG 3
n01664065/n01664065_17776.JPEG 3
n01664065/n01664065_1779.JPEG 3
n01664065/n01664065_17803.JPEG 3
n01664065/n01664065_17836.JPEG 3
n01664065/n01664065_17848.JPEG 3
n01664065/n01664065_1785.JPEG 3
n01664065/n01664065_17871.JPEG 3
n01664065/n01664065_17886.JPEG 3
n01664065/n01664065_17895.JPEG 3
n01664065/n01664065_17922.JPEG 3
n01664065/n01664065_17923.JPEG 3
n01664065/n01664065_17947.JPEG 3
n01664065/n01664065_17948.JPEG 3
n01664065/n01664065_17949.JPEG 3
n01664065/n01664065_17963.JPEG 3
n01664065/n01664065_17975.JPEG 3
n01664065/n01664065_17982.JPEG 3
n01664065/n01664065_18.JPEG 3
n01664065/n01664065_18010.JPEG 3
n01664065/n01664065_1802.JPEG 3
n01664065/n01664065_18044.JPEG 3
n01664065/n01664065_18047.JPEG 3
n01664065/n01664065_18059.JPEG 3
n01664065/n01664065_18122.JPEG 3
n01664065/n01664065_18127.JPEG 3
n01664065/n01664065_1813.JPEG 3
n01664065/n01664065_1814.JPEG 3
n01664065/n01664065_18146.JPEG 3
n01664065/n01664065_18162.JPEG 3
n01664065/n01664065_18194.JPEG 3
n01664065/n01664065_18226.JPEG 3
n01664065/n01664065_18239.JPEG 3
n01664065/n01664065_18246.JPEG 3
n01664065/n01664065_18311.JPEG 3
n01664065/n01664065_18320.JPEG 3
n01664065/n01664065_18335.JPEG 3
n01664065/n01664065_18340.JPEG 3
n01664065/n01664065_1837.JPEG 3
n01664065/n01664065_18387.JPEG 3
n01664065/n01664065_18392.JPEG 3
n01664065/n01664065_18408.JPEG 3
n01664065/n01664065_18427.JPEG 3
n01664065/n01664065_18430.JPEG 3
n01664065/n01664065_18440.JPEG 3
n01664065/n01664065_1845.JPEG 3
n01664065/n01664065_18455.JPEG 3
n01664065/n01664065_18468.JPEG 3
n01664065/n01664065_1847.JPEG 3
n01664065/n01664065_18479.JPEG 3
n01664065/n01664065_186.JPEG 3
n01664065/n01664065_1865.JPEG 3
n01664065/n01664065_1867.JPEG 3
n01664065/n01664065_18695.JPEG 3
n01664065/n01664065_18713.JPEG 3
n01664065/n01664065_18733.JPEG 3
n01664065/n01664065_18746.JPEG 3
n01664065/n01664065_18768.JPEG 3
n01664065/n01664065_18772.JPEG 3
n01664065/n01664065_18779.JPEG 3
n01664065/n01664065_18808.JPEG 3
n01664065/n01664065_1881.JPEG 3
n01664065/n01664065_18943.JPEG 3
n01664065/n01664065_18947.JPEG 3
n01664065/n01664065_18954.JPEG 3
n01664065/n01664065_1900.JPEG 3
n01664065/n01664065_19011.JPEG 3
n01664065/n01664065_1906.JPEG 3
n01664065/n01664065_19082.JPEG 3
n01664065/n01664065_19095.JPEG 3
n01664065/n01664065_19101.JPEG 3
n01664065/n01664065_19136.JPEG 3
n01664065/n01664065_19174.JPEG 3
n01664065/n01664065_19185.JPEG 3
n01664065/n01664065_192.JPEG 3
n01664065/n01664065_19220.JPEG 3
n01664065/n01664065_19234.JPEG 3
n01664065/n01664065_19259.JPEG 3
n01664065/n01664065_1927.JPEG 3
n01664065/n01664065_19273.JPEG 3
n01664065/n01664065_19288.JPEG 3
n01664065/n01664065_19306.JPEG 3
n01664065/n01664065_19317.JPEG 3
n01664065/n01664065_1933.JPEG 3
n01664065/n01664065_1945.JPEG 3
n01664065/n01664065_19478.JPEG 3
n01664065/n01664065_19495.JPEG 3
n01664065/n01664065_19498.JPEG 3
n01664065/n01664065_19521.JPEG 3
n01664065/n01664065_19576.JPEG 3
n01664065/n01664065_19582.JPEG 3
n01664065/n01664065_1959.JPEG 3
n01664065/n01664065_1960.JPEG 3
n01664065/n01664065_1962.JPEG 3
n01664065/n01664065_19627.JPEG 3
n01664065/n01664065_19644.JPEG 3
n01664065/n01664065_1965.JPEG 3
n01664065/n01664065_1967.JPEG 3
n01664065/n01664065_19698.JPEG 3
n01664065/n01664065_19702.JPEG 3
n01664065/n01664065_19737.JPEG 3
n01664065/n01664065_1977.JPEG 3
n01664065/n01664065_1980.JPEG 3
n01664065/n01664065_19812.JPEG 3
n01664065/n01664065_19827.JPEG 3
n01664065/n01664065_19866.JPEG 3
n01664065/n01664065_19883.JPEG 3
n01664065/n01664065_19895.JPEG 3
n01664065/n01664065_1992.JPEG 3
n01664065/n01664065_19937.JPEG 3
n01664065/n01664065_19961.JPEG 3
n01664065/n01664065_20032.JPEG 3
n01664065/n01664065_20052.JPEG 3
n01664065/n01664065_20053.JPEG 3
n01664065/n01664065_2006.JPEG 3
n01664065/n01664065_2022.JPEG 3
n01664065/n01664065_2028.JPEG 3
n01664065/n01664065_20292.JPEG 3
n01664065/n01664065_2032.JPEG 3
n01664065/n01664065_20339.JPEG 3
n01664065/n01664065_20354.JPEG 3
n01664065/n01664065_20362.JPEG 3
n01664065/n01664065_2039.JPEG 3
n01664065/n01664065_20467.JPEG 3
n01664065/n01664065_20469.JPEG 3
n01664065/n01664065_2048.JPEG 3
n01664065/n01664065_2049.JPEG 3
n01664065/n01664065_20505.JPEG 3
n01664065/n01664065_20571.JPEG 3
n01664065/n01664065_2058.JPEG 3
n01664065/n01664065_2063.JPEG 3
n01664065/n01664065_20644.JPEG 3
n01664065/n01664065_2067.JPEG 3
n01664065/n01664065_20699.JPEG 3
n01664065/n01664065_2077.JPEG 3
n01664065/n01664065_208.JPEG 3
n01664065/n01664065_20803.JPEG 3
n01664065/n01664065_20814.JPEG 3
n01664065/n01664065_20817.JPEG 3
n01664065/n01664065_2082.JPEG 3
n01664065/n01664065_20974.JPEG 3
n01664065/n01664065_2107.JPEG 3
n01664065/n01664065_2112.JPEG 3
n01664065/n01664065_21127.JPEG 3
n01664065/n01664065_21235.JPEG 3
n01664065/n01664065_21265.JPEG 3
n01664065/n01664065_21277.JPEG 3
n01664065/n01664065_21283.JPEG 3
n01664065/n01664065_21353.JPEG 3
n01664065/n01664065_21394.JPEG 3
n01664065/n01664065_21415.JPEG 3
n01664065/n01664065_21490.JPEG 3
n01664065/n01664065_2150.JPEG 3
n01664065/n01664065_2152.JPEG 3
n01664065/n01664065_21525.JPEG 3
n01664065/n01664065_21573.JPEG 3
n01664065/n01664065_21602.JPEG 3
n01664065/n01664065_21610.JPEG 3
n01664065/n01664065_21619.JPEG 3
n01664065/n01664065_21661.JPEG 3
n01664065/n01664065_21666.JPEG 3
n01664065/n01664065_2167.JPEG 3
n01664065/n01664065_21680.JPEG 3
n01664065/n01664065_21690.JPEG 3
n01664065/n01664065_21730.JPEG 3
n01664065/n01664065_21757.JPEG 3
n01664065/n01664065_21766.JPEG 3
n01664065/n01664065_21771.JPEG 3
n01664065/n01664065_21809.JPEG 3
n01664065/n01664065_21810.JPEG 3
n01664065/n01664065_2183.JPEG 3
n01664065/n01664065_21867.JPEG 3
n01664065/n01664065_2188.JPEG 3
n01664065/n01664065_21957.JPEG 3
n01664065/n01664065_21969.JPEG 3
n01664065/n01664065_21982.JPEG 3
n01664065/n01664065_21990.JPEG 3
n01664065/n01664065_22030.JPEG 3
n01664065/n01664065_22036.JPEG 3
n01664065/n01664065_22080.JPEG 3
n01664065/n01664065_22100.JPEG 3
n01664065/n01664065_22123.JPEG 3
n01664065/n01664065_22152.JPEG 3
n01664065/n01664065_22164.JPEG 3
n01664065/n01664065_22188.JPEG 3
n01664065/n01664065_2223.JPEG 3
n01664065/n01664065_22250.JPEG 3
n01664065/n01664065_22252.JPEG 3
n01664065/n01664065_2230.JPEG 3
n01664065/n01664065_2233.JPEG 3
n01664065/n01664065_22330.JPEG 3
n01664065/n01664065_22349.JPEG 3
n01664065/n01664065_22400.JPEG 3
n01664065/n01664065_2241.JPEG 3
n01664065/n01664065_22434.JPEG 3
n01664065/n01664065_2246.JPEG 3
n01664065/n01664065_2248.JPEG 3
n01664065/n01664065_22480.JPEG 3
n01664065/n01664065_2251.JPEG 3
n01664065/n01664065_22513.JPEG 3
n01664065/n01664065_22552.JPEG 3
n01664065/n01664065_22589.JPEG 3
n01664065/n01664065_2261.JPEG 3
n01664065/n01664065_22641.JPEG 3
n01664065/n01664065_22679.JPEG 3
n01664065/n01664065_22683.JPEG 3
n01664065/n01664065_22713.JPEG 3
n01664065/n01664065_22716.JPEG 3
n01664065/n01664065_2273.JPEG 3
n01664065/n01664065_22755.JPEG 3
n01664065/n01664065_22776.JPEG 3
n01664065/n01664065_22818.JPEG 3
n01664065/n01664065_22864.JPEG 3
n01664065/n01664065_22878.JPEG 3
n01664065/n01664065_22995.JPEG 3
n01664065/n01664065_23014.JPEG 3
n01664065/n01664065_23093.JPEG 3
n01664065/n01664065_23099.JPEG 3
n01664065/n01664065_23111.JPEG 3
n01664065/n01664065_2312.JPEG 3
n01664065/n01664065_23154.JPEG 3
n01664065/n01664065_23177.JPEG 3
n01664065/n01664065_23185.JPEG 3
n01664065/n01664065_2319.JPEG 3
n01664065/n01664065_23237.JPEG 3
n01664065/n01664065_23267.JPEG 3
n01664065/n01664065_23300.JPEG 3
n01664065/n01664065_23336.JPEG 3
n01664065/n01664065_2334.JPEG 3
n01664065/n01664065_23374.JPEG 3
n01664065/n01664065_23395.JPEG 3
n01664065/n01664065_23413.JPEG 3
n01664065/n01664065_2342.JPEG 3
n01664065/n01664065_2345.JPEG 3
n01664065/n01664065_23477.JPEG 3
n01664065/n01664065_23494.JPEG 3
n01664065/n01664065_23501.JPEG 3
n01664065/n01664065_23526.JPEG 3
n01664065/n01664065_2355.JPEG 3
n01664065/n01664065_23560.JPEG 3
n01664065/n01664065_23579.JPEG 3
n01664065/n01664065_2358.JPEG 3
n01664065/n01664065_23606.JPEG 3
n01664065/n01664065_23617.JPEG 3
n01664065/n01664065_23620.JPEG 3
n01664065/n01664065_23646.JPEG 3
n01664065/n01664065_2370.JPEG 3
n01664065/n01664065_2377.JPEG 3
n01664065/n01664065_23865.JPEG 3
n01664065/n01664065_2388.JPEG 3
n01664065/n01664065_239.JPEG 3
n01664065/n01664065_23917.JPEG 3
n01664065/n01664065_23937.JPEG 3
n01664065/n01664065_2394.JPEG 3
n01664065/n01664065_23993.JPEG 3
n01664065/n01664065_2403.JPEG 3
n01664065/n01664065_24105.JPEG 3
n01664065/n01664065_2411.JPEG 3
n01664065/n01664065_24203.JPEG 3
n01664065/n01664065_2421.JPEG 3
n01664065/n01664065_2431.JPEG 3
n01664065/n01664065_24336.JPEG 3
n01664065/n01664065_24351.JPEG 3
n01664065/n01664065_24376.JPEG 3
n01664065/n01664065_2443.JPEG 3
n01664065/n01664065_2448.JPEG 3
n01664065/n01664065_24496.JPEG 3
n01664065/n01664065_24540.JPEG 3
n01664065/n01664065_24556.JPEG 3
n01664065/n01664065_24561.JPEG 3
n01664065/n01664065_24565.JPEG 3
n01664065/n01664065_2457.JPEG 3
n01664065/n01664065_24588.JPEG 3
n01664065/n01664065_24636.JPEG 3
n01664065/n01664065_2471.JPEG 3
n01664065/n01664065_24711.JPEG 3
n01664065/n01664065_2475.JPEG 3
n01664065/n01664065_2476.JPEG 3
n01664065/n01664065_24818.JPEG 3
n01664065/n01664065_24824.JPEG 3
n01664065/n01664065_24835.JPEG 3
n01664065/n01664065_24849.JPEG 3
n01664065/n01664065_2487.JPEG 3
n01664065/n01664065_24893.JPEG 3
n01664065/n01664065_249.JPEG 3
n01664065/n01664065_24953.JPEG 3
n01664065/n01664065_24956.JPEG 3
n01664065/n01664065_2496.JPEG 3
n01664065/n01664065_25032.JPEG 3
n01664065/n01664065_2505.JPEG 3
n01664065/n01664065_25071.JPEG 3
n01664065/n01664065_2508.JPEG 3
n01664065/n01664065_2511.JPEG 3
n01664065/n01664065_2512.JPEG 3
n01664065/n01664065_2514.JPEG 3
n01664065/n01664065_25153.JPEG 3
n01664065/n01664065_25163.JPEG 3
n01664065/n01664065_25202.JPEG 3
n01664065/n01664065_25219.JPEG 3
n01664065/n01664065_25232.JPEG 3
n01664065/n01664065_25287.JPEG 3
n01664065/n01664065_25342.JPEG 3
n01664065/n01664065_25400.JPEG 3
n01664065/n01664065_25420.JPEG 3
n01664065/n01664065_25438.JPEG 3
n01664065/n01664065_2546.JPEG 3
n01664065/n01664065_2549.JPEG 3
n01664065/n01664065_2551.JPEG 3
n01664065/n01664065_25521.JPEG 3
n01664065/n01664065_25739.JPEG 3
n01664065/n01664065_25761.JPEG 3
n01664065/n01664065_2580.JPEG 3
n01664065/n01664065_25844.JPEG 3
n01664065/n01664065_25894.JPEG 3
n01664065/n01664065_2590.JPEG 3
n01664065/n01664065_25913.JPEG 3
n01664065/n01664065_25975.JPEG 3
n01664065/n01664065_2602.JPEG 3
n01664065/n01664065_26038.JPEG 3
n01664065/n01664065_2605.JPEG 3
n01664065/n01664065_26051.JPEG 3
n01664065/n01664065_2613.JPEG 3
n01664065/n01664065_26133.JPEG 3
n01664065/n01664065_2619.JPEG 3
n01664065/n01664065_26191.JPEG 3
n01664065/n01664065_26246.JPEG 3
n01664065/n01664065_26268.JPEG 3
n01664065/n01664065_26292.JPEG 3
n01664065/n01664065_26298.JPEG 3
n01664065/n01664065_26318.JPEG 3
n01664065/n01664065_2633.JPEG 3
n01664065/n01664065_26336.JPEG 3
n01664065/n01664065_26497.JPEG 3
n01664065/n01664065_26514.JPEG 3
n01664065/n01664065_2658.JPEG 3
n01664065/n01664065_26635.JPEG 3
n01664065/n01664065_2664.JPEG 3
n01664065/n01664065_26665.JPEG 3
n01664065/n01664065_2691.JPEG 3
n01664065/n01664065_27.JPEG 3
n01664065/n01664065_270.JPEG 3
n01664065/n01664065_2702.JPEG 3
n01664065/n01664065_2714.JPEG 3
n01664065/n01664065_27145.JPEG 3
n01664065/n01664065_27207.JPEG 3
n01664065/n01664065_2722.JPEG 3
n01664065/n01664065_2726.JPEG 3
n01664065/n01664065_27266.JPEG 3
n01664065/n01664065_2733.JPEG 3
n01664065/n01664065_2744.JPEG 3
n01664065/n01664065_2745.JPEG 3
n01664065/n01664065_27492.JPEG 3
n01664065/n01664065_275.JPEG 3
n01664065/n01664065_27508.JPEG 3
n01664065/n01664065_2753.JPEG 3
n01664065/n01664065_27554.JPEG 3
n01664065/n01664065_2768.JPEG 3
n01664065/n01664065_27694.JPEG 3
n01664065/n01664065_277.JPEG 3
n01664065/n01664065_27716.JPEG 3
n01664065/n01664065_2775.JPEG 3
n01664065/n01664065_2777.JPEG 3
n01664065/n01664065_27821.JPEG 3
n01664065/n01664065_27849.JPEG 3
n01664065/n01664065_2785.JPEG 3
n01664065/n01664065_2791.JPEG 3
n01664065/n01664065_27916.JPEG 3
n01664065/n01664065_27939.JPEG 3
n01664065/n01664065_2794.JPEG 3
n01664065/n01664065_28008.JPEG 3
n01664065/n01664065_28029.JPEG 3
n01664065/n01664065_2804.JPEG 3
n01664065/n01664065_28051.JPEG 3
n01664065/n01664065_2807.JPEG 3
n01664065/n01664065_281.JPEG 3
n01664065/n01664065_28112.JPEG 3
n01664065/n01664065_2814.JPEG 3
n01664065/n01664065_28150.JPEG 3
n01664065/n01664065_28160.JPEG 3
n01664065/n01664065_28161.JPEG 3
n01664065/n01664065_28177.JPEG 3
n01664065/n01664065_28217.JPEG 3
n01664065/n01664065_28239.JPEG 3
n01664065/n01664065_2824.JPEG 3
n01664065/n01664065_2826.JPEG 3
n01664065/n01664065_2827.JPEG 3
n01664065/n01664065_28300.JPEG 3
n01664065/n01664065_28355.JPEG 3
n01664065/n01664065_28357.JPEG 3
n01664065/n01664065_28420.JPEG 3
n01664065/n01664065_28443.JPEG 3
n01664065/n01664065_28468.JPEG 3
n01664065/n01664065_28503.JPEG 3
n01664065/n01664065_28626.JPEG 3
n01664065/n01664065_28666.JPEG 3
n01664065/n01664065_28738.JPEG 3
n01664065/n01664065_28744.JPEG 3
n01664065/n01664065_2877.JPEG 3
n01664065/n01664065_28824.JPEG 3
n01664065/n01664065_28827.JPEG 3
n01664065/n01664065_28847.JPEG 3
n01664065/n01664065_28894.JPEG 3
n01664065/n01664065_2896.JPEG 3
n01664065/n01664065_29036.JPEG 3
n01664065/n01664065_29044.JPEG 3
n01664065/n01664065_2908.JPEG 3
n01664065/n01664065_2910.JPEG 3
n01664065/n01664065_29111.JPEG 3
n01664065/n01664065_29113.JPEG 3
n01664065/n01664065_2913.JPEG 3
n01664065/n01664065_2915.JPEG 3
n01664065/n01664065_29159.JPEG 3
n01664065/n01664065_2920.JPEG 3
n01664065/n01664065_29228.JPEG 3
n01664065/n01664065_29232.JPEG 3
n01664065/n01664065_29254.JPEG 3
n01664065/n01664065_2928.JPEG 3
n01664065/n01664065_29298.JPEG 3
n01664065/n01664065_29366.JPEG 3
n01664065/n01664065_29386.JPEG 3
n01664065/n01664065_29440.JPEG 3
n01664065/n01664065_29446.JPEG 3
n01664065/n01664065_29464.JPEG 3
n01664065/n01664065_29465.JPEG 3
n01664065/n01664065_29468.JPEG 3
n01664065/n01664065_29546.JPEG 3
n01664065/n01664065_29585.JPEG 3
n01664065/n01664065_29738.JPEG 3
n01664065/n01664065_29753.JPEG 3
n01664065/n01664065_29801.JPEG 3
n01664065/n01664065_29807.JPEG 3
n01664065/n01664065_2984.JPEG 3
n01664065/n01664065_29851.JPEG 3
n01664065/n01664065_2990.JPEG 3
n01664065/n01664065_29900.JPEG 3
n01664065/n01664065_2991.JPEG 3
n01664065/n01664065_30002.JPEG 3
n01664065/n01664065_3004.JPEG 3
n01664065/n01664065_30058.JPEG 3
n01664065/n01664065_3008.JPEG 3
n01664065/n01664065_3013.JPEG 3
n01664065/n01664065_30137.JPEG 3
n01664065/n01664065_30158.JPEG 3
n01664065/n01664065_30159.JPEG 3
n01664065/n01664065_30171.JPEG 3
n01664065/n01664065_30176.JPEG 3
n01664065/n01664065_30184.JPEG 3
n01664065/n01664065_30226.JPEG 3
n01664065/n01664065_3026.JPEG 3
n01664065/n01664065_30263.JPEG 3
n01664065/n01664065_30279.JPEG 3
n01664065/n01664065_30294.JPEG 3
n01664065/n01664065_3032.JPEG 3
n01664065/n01664065_30322.JPEG 3
n01664065/n01664065_30325.JPEG 3
n01664065/n01664065_30328.JPEG 3
n01664065/n01664065_30335.JPEG 3
n01664065/n01664065_30352.JPEG 3
n01664065/n01664065_30451.JPEG 3
n01664065/n01664065_30488.JPEG 3
n01664065/n01664065_305.JPEG 3
n01664065/n01664065_30559.JPEG 3
n01664065/n01664065_3063.JPEG 3
n01664065/n01664065_30633.JPEG 3
n01664065/n01664065_3074.JPEG 3
n01664065/n01664065_3075.JPEG 3
n01664065/n01664065_3076.JPEG 3
n01664065/n01664065_30868.JPEG 3
n01664065/n01664065_30934.JPEG 3
n01664065/n01664065_30972.JPEG 3
n01664065/n01664065_310.JPEG 3
n01664065/n01664065_31007.JPEG 3
n01664065/n01664065_3102.JPEG 3
n01664065/n01664065_31022.JPEG 3
n01664065/n01664065_31057.JPEG 3
n01664065/n01664065_311.JPEG 3
n01664065/n01664065_31178.JPEG 3
n01664065/n01664065_312.JPEG 3
n01664065/n01664065_31217.JPEG 3
n01664065/n01664065_31227.JPEG 3
n01664065/n01664065_31239.JPEG 3
n01664065/n01664065_31273.JPEG 3
n01664065/n01664065_3128.JPEG 3
n01664065/n01664065_313.JPEG 3
n01664065/n01664065_3133.JPEG 3
n01664065/n01664065_31368.JPEG 3
n01664065/n01664065_3139.JPEG 3
n01664065/n01664065_31450.JPEG 3
n01664065/n01664065_3148.JPEG 3
n01664065/n01664065_31499.JPEG 3
n01664065/n01664065_3153.JPEG 3
n01664065/n01664065_31548.JPEG 3
n01664065/n01664065_3158.JPEG 3
n01664065/n01664065_31623.JPEG 3
n01664065/n01664065_3163.JPEG 3
n01664065/n01664065_31648.JPEG 3
n01664065/n01664065_31649.JPEG 3
n01664065/n01664065_3166.JPEG 3
n01664065/n01664065_31693.JPEG 3
n01664065/n01664065_31749.JPEG 3
n01664065/n01664065_31758.JPEG 3
n01664065/n01664065_31788.JPEG 3
n01664065/n01664065_31874.JPEG 3
n01664065/n01664065_31916.JPEG 3
n01664065/n01664065_32069.JPEG 3
n01664065/n01664065_32101.JPEG 3
n01664065/n01664065_32129.JPEG 3
n01664065/n01664065_32210.JPEG 3
n01664065/n01664065_32222.JPEG 3
n01664065/n01664065_3228.JPEG 3
n01664065/n01664065_323.JPEG 3
n01664065/n01664065_3232.JPEG 3
n01664065/n01664065_32379.JPEG 3
n01664065/n01664065_3240.JPEG 3
n01664065/n01664065_32418.JPEG 3
n01664065/n01664065_32427.JPEG 3
n01664065/n01664065_32493.JPEG 3
n01664065/n01664065_3255.JPEG 3
n01664065/n01664065_32602.JPEG 3
n01664065/n01664065_3267.JPEG 3
n01664065/n01664065_32672.JPEG 3
n01664065/n01664065_32704.JPEG 3
n01664065/n01664065_32800.JPEG 3
n01664065/n01664065_32805.JPEG 3
n01664065/n01664065_32828.JPEG 3
n01664065/n01664065_3298.JPEG 3
n01664065/n01664065_3303.JPEG 3
n01664065/n01664065_33068.JPEG 3
n01664065/n01664065_33149.JPEG 3
n01664065/n01664065_33180.JPEG 3
n01664065/n01664065_33189.JPEG 3
n01664065/n01664065_33193.JPEG 3
n01664065/n01664065_33199.JPEG 3
n01664065/n01664065_33219.JPEG 3
n01664065/n01664065_33250.JPEG 3
n01664065/n01664065_33251.JPEG 3
n01664065/n01664065_33296.JPEG 3
n01664065/n01664065_33334.JPEG 3
n01664065/n01664065_3344.JPEG 3
n01664065/n01664065_33488.JPEG 3
n01664065/n01664065_33535.JPEG 3
n01664065/n01664065_33561.JPEG 3
n01664065/n01664065_33680.JPEG 3
n01664065/n01664065_3378.JPEG 3
n01664065/n01664065_33839.JPEG 3
n01664065/n01664065_33871.JPEG 3
n01664065/n01664065_3389.JPEG 3
n01664065/n01664065_33892.JPEG 3
n01664065/n01664065_33895.JPEG 3
n01664065/n01664065_33898.JPEG 3
n01664065/n01664065_3392.JPEG 3
n01664065/n01664065_3393.JPEG 3
n01664065/n01664065_3398.JPEG 3
n01664065/n01664065_3408.JPEG 3
n01664065/n01664065_3413.JPEG 3
n01664065/n01664065_3414.JPEG 3
n01664065/n01664065_3424.JPEG 3
n01664065/n01664065_3431.JPEG 3
n01664065/n01664065_3435.JPEG 3
n01664065/n01664065_3483.JPEG 3
n01664065/n01664065_352.JPEG 3
n01664065/n01664065_3524.JPEG 3
n01664065/n01664065_3540.JPEG 3
n01664065/n01664065_3543.JPEG 3
n01664065/n01664065_3550.JPEG 3
n01664065/n01664065_35717.JPEG 3
n01664065/n01664065_3595.JPEG 3
n01664065/n01664065_360.JPEG 3
n01664065/n01664065_361.JPEG 3
n01664065/n01664065_3610.JPEG 3
n01664065/n01664065_3614.JPEG 3
n01664065/n01664065_3617.JPEG 3
n01664065/n01664065_36521.JPEG 3
n01664065/n01664065_3655.JPEG 3
n01664065/n01664065_3660.JPEG 3
n01664065/n01664065_3661.JPEG 3
n01664065/n01664065_3720.JPEG 3
n01664065/n01664065_3737.JPEG 3
n01664065/n01664065_37429.JPEG 3
n01664065/n01664065_3753.JPEG 3
n01664065/n01664065_3754.JPEG 3
n01664065/n01664065_3787.JPEG 3
n01664065/n01664065_3813.JPEG 3
n01664065/n01664065_3843.JPEG 3
n01664065/n01664065_385.JPEG 3
n01664065/n01664065_3884.JPEG 3
n01664065/n01664065_3887.JPEG 3
n01664065/n01664065_389.JPEG 3
n01664065/n01664065_3896.JPEG 3
n01664065/n01664065_3907.JPEG 3
n01664065/n01664065_394.JPEG 3
n01664065/n01664065_3940.JPEG 3
n01664065/n01664065_3945.JPEG 3
n01664065/n01664065_3950.JPEG 3
n01664065/n01664065_3958.JPEG 3
n01664065/n01664065_3972.JPEG 3
n01664065/n01664065_3989.JPEG 3
n01664065/n01664065_4.JPEG 3
n01664065/n01664065_4022.JPEG 3
n01664065/n01664065_4037.JPEG 3
n01664065/n01664065_406.JPEG 3
n01664065/n01664065_4081.JPEG 3
n01664065/n01664065_4095.JPEG 3
n01664065/n01664065_4111.JPEG 3
n01664065/n01664065_4115.JPEG 3
n01664065/n01664065_4117.JPEG 3
n01664065/n01664065_4120.JPEG 3
n01664065/n01664065_4122.JPEG 3
n01664065/n01664065_4137.JPEG 3
n01664065/n01664065_4161.JPEG 3
n01664065/n01664065_4169.JPEG 3
n01664065/n01664065_4196.JPEG 3
n01664065/n01664065_4211.JPEG 3
n01664065/n01664065_423.JPEG 3
n01664065/n01664065_4233.JPEG 3
n01664065/n01664065_42413.JPEG 3
n01664065/n01664065_4251.JPEG 3
n01664065/n01664065_4258.JPEG 3
n01664065/n01664065_4268.JPEG 3
n01664065/n01664065_427.JPEG 3
n01664065/n01664065_4282.JPEG 3
n01664065/n01664065_4290.JPEG 3
n01664065/n01664065_430.JPEG 3
n01664065/n01664065_4302.JPEG 3
n01664065/n01664065_4313.JPEG 3
n01664065/n01664065_4316.JPEG 3
n01664065/n01664065_4349.JPEG 3
n01664065/n01664065_4359.JPEG 3
n01664065/n01664065_4373.JPEG 3
n01664065/n01664065_4401.JPEG 3
n01664065/n01664065_4415.JPEG 3
n01664065/n01664065_4442.JPEG 3
n01664065/n01664065_4455.JPEG 3
n01664065/n01664065_4489.JPEG 3
n01664065/n01664065_4494.JPEG 3
n01664065/n01664065_4537.JPEG 3
n01664065/n01664065_4548.JPEG 3
n01664065/n01664065_459.JPEG 3
n01664065/n01664065_4590.JPEG 3
n01664065/n01664065_4616.JPEG 3
n01664065/n01664065_4660.JPEG 3
n01664065/n01664065_4664.JPEG 3
n01664065/n01664065_4671.JPEG 3
n01664065/n01664065_4745.JPEG 3
n01664065/n01664065_47574.JPEG 3
n01664065/n01664065_4767.JPEG 3
n01664065/n01664065_4786.JPEG 3
n01664065/n01664065_480.JPEG 3
n01664065/n01664065_4811.JPEG 3
n01664065/n01664065_4870.JPEG 3
n01664065/n01664065_4888.JPEG 3
n01664065/n01664065_4890.JPEG 3
n01664065/n01664065_4924.JPEG 3
n01664065/n01664065_4932.JPEG 3
n01664065/n01664065_4994.JPEG 3
n01664065/n01664065_5005.JPEG 3
n01664065/n01664065_5049.JPEG 3
n01664065/n01664065_5084.JPEG 3
n01664065/n01664065_5086.JPEG 3
n01664065/n01664065_5088.JPEG 3
n01664065/n01664065_5177.JPEG 3
n01664065/n01664065_5211.JPEG 3
n01664065/n01664065_5268.JPEG 3
n01664065/n01664065_53.JPEG 3
n01664065/n01664065_5314.JPEG 3
n01664065/n01664065_5335.JPEG 3
n01664065/n01664065_5346.JPEG 3
n01664065/n01664065_5374.JPEG 3
n01664065/n01664065_5391.JPEG 3
n01664065/n01664065_541.JPEG 3
n01664065/n01664065_5410.JPEG 3
n01664065/n01664065_5413.JPEG 3
n01664065/n01664065_5453.JPEG 3
n01664065/n01664065_5473.JPEG 3
n01664065/n01664065_5537.JPEG 3
n01664065/n01664065_5554.JPEG 3
n01664065/n01664065_5575.JPEG 3
n01664065/n01664065_5589.JPEG 3
n01664065/n01664065_563.JPEG 3
n01664065/n01664065_5662.JPEG 3
n01664065/n01664065_5663.JPEG 3
n01664065/n01664065_5671.JPEG 3
n01664065/n01664065_5687.JPEG 3
n01664065/n01664065_5748.JPEG 3
n01664065/n01664065_5763.JPEG 3
n01664065/n01664065_5803.JPEG 3
n01664065/n01664065_5885.JPEG 3
n01664065/n01664065_5888.JPEG 3
n01664065/n01664065_5913.JPEG 3
n01664065/n01664065_5920.JPEG 3
n01664065/n01664065_5943.JPEG 3
n01664065/n01664065_5950.JPEG 3
n01664065/n01664065_5974.JPEG 3
n01664065/n01664065_6005.JPEG 3
n01664065/n01664065_6024.JPEG 3
n01664065/n01664065_6042.JPEG 3
n01664065/n01664065_6065.JPEG 3
n01664065/n01664065_6091.JPEG 3
n01664065/n01664065_6108.JPEG 3
n01664065/n01664065_6183.JPEG 3
n01664065/n01664065_6220.JPEG 3
n01664065/n01664065_6324.JPEG 3
n01664065/n01664065_6330.JPEG 3
n01664065/n01664065_6335.JPEG 3
n01664065/n01664065_6394.JPEG 3
n01664065/n01664065_6466.JPEG 3
n01664065/n01664065_6478.JPEG 3
n01664065/n01664065_6498.JPEG 3
n01664065/n01664065_6541.JPEG 3
n01664065/n01664065_6616.JPEG 3
n01664065/n01664065_6625.JPEG 3
n01664065/n01664065_666.JPEG 3
n01664065/n01664065_6679.JPEG 3
n01664065/n01664065_6709.JPEG 3
n01664065/n01664065_6719.JPEG 3
n01664065/n01664065_6721.JPEG 3
n01664065/n01664065_6728.JPEG 3
n01664065/n01664065_6828.JPEG 3
n01664065/n01664065_6842.JPEG 3
n01664065/n01664065_685.JPEG 3
n01664065/n01664065_6873.JPEG 3
n01664065/n01664065_688.JPEG 3
n01664065/n01664065_6882.JPEG 3
n01664065/n01664065_690.JPEG 3
n01664065/n01664065_6903.JPEG 3
n01664065/n01664065_6910.JPEG 3
n01664065/n01664065_6919.JPEG 3
n01664065/n01664065_6929.JPEG 3
n01664065/n01664065_6937.JPEG 3
n01664065/n01664065_6945.JPEG 3
n01664065/n01664065_7039.JPEG 3
n01664065/n01664065_7050.JPEG 3
n01664065/n01664065_7062.JPEG 3
n01664065/n01664065_7074.JPEG 3
n01664065/n01664065_7078.JPEG 3
n01664065/n01664065_7085.JPEG 3
n01664065/n01664065_7098.JPEG 3
n01664065/n01664065_7103.JPEG 3
n01664065/n01664065_7136.JPEG 3
n01664065/n01664065_716.JPEG 3
n01664065/n01664065_7173.JPEG 3
n01664065/n01664065_7191.JPEG 3
n01664065/n01664065_7213.JPEG 3
n01664065/n01664065_7265.JPEG 3
n01664065/n01664065_7281.JPEG 3
n01664065/n01664065_7285.JPEG 3
n01664065/n01664065_7333.JPEG 3
n01664065/n01664065_7334.JPEG 3
n01664065/n01664065_7417.JPEG 3
n01664065/n01664065_7469.JPEG 3
n01664065/n01664065_747.JPEG 3
n01664065/n01664065_752.JPEG 3
n01664065/n01664065_7535.JPEG 3
n01664065/n01664065_7546.JPEG 3
n01664065/n01664065_756.JPEG 3
n01664065/n01664065_7586.JPEG 3
n01664065/n01664065_7595.JPEG 3
n01664065/n01664065_7611.JPEG 3
n01664065/n01664065_7620.JPEG 3
n01664065/n01664065_764.JPEG 3
n01664065/n01664065_7648.JPEG 3
n01664065/n01664065_7678.JPEG 3
n01664065/n01664065_7688.JPEG 3
n01664065/n01664065_7699.JPEG 3
n01664065/n01664065_7702.JPEG 3
n01664065/n01664065_7703.JPEG 3
n01664065/n01664065_7736.JPEG 3
n01664065/n01664065_7755.JPEG 3
n01664065/n01664065_7756.JPEG 3
n01664065/n01664065_7764.JPEG 3
n01664065/n01664065_7773.JPEG 3
n01664065/n01664065_7780.JPEG 3
n01664065/n01664065_7790.JPEG 3
n01664065/n01664065_7797.JPEG 3
n01664065/n01664065_7799.JPEG 3
n01664065/n01664065_7845.JPEG 3
n01664065/n01664065_7860.JPEG 3
n01664065/n01664065_7912.JPEG 3
n01664065/n01664065_7943.JPEG 3
n01664065/n01664065_795.JPEG 3
n01664065/n01664065_7950.JPEG 3
n01664065/n01664065_7954.JPEG 3
n01664065/n01664065_7962.JPEG 3
n01664065/n01664065_7986.JPEG 3
n01664065/n01664065_8004.JPEG 3
n01664065/n01664065_8007.JPEG 3
n01664065/n01664065_8016.JPEG 3
n01664065/n01664065_8041.JPEG 3
n01664065/n01664065_8047.JPEG 3
n01664065/n01664065_8062.JPEG 3
n01664065/n01664065_8079.JPEG 3
n01664065/n01664065_810.JPEG 3
n01664065/n01664065_8143.JPEG 3
n01664065/n01664065_8163.JPEG 3
n01664065/n01664065_8176.JPEG 3
n01664065/n01664065_8201.JPEG 3
n01664065/n01664065_822.JPEG 3
n01664065/n01664065_8233.JPEG 3
n01664065/n01664065_8255.JPEG 3
n01664065/n01664065_8268.JPEG 3
n01664065/n01664065_8322.JPEG 3
n01664065/n01664065_8328.JPEG 3
n01664065/n01664065_8331.JPEG 3
n01664065/n01664065_8341.JPEG 3
n01664065/n01664065_8363.JPEG 3
n01664065/n01664065_8370.JPEG 3
n01664065/n01664065_84.JPEG 3
n01664065/n01664065_8402.JPEG 3
n01664065/n01664065_8437.JPEG 3
n01664065/n01664065_8441.JPEG 3
n01664065/n01664065_8466.JPEG 3
n01664065/n01664065_8481.JPEG 3
n01664065/n01664065_8483.JPEG 3
n01664065/n01664065_8485.JPEG 3
n01664065/n01664065_8486.JPEG 3
n01664065/n01664065_8499.JPEG 3
n01664065/n01664065_851.JPEG 3
n01664065/n01664065_8511.JPEG 3
n01664065/n01664065_8551.JPEG 3
n01664065/n01664065_8558.JPEG 3
n01664065/n01664065_8566.JPEG 3
n01664065/n01664065_8591.JPEG 3
n01664065/n01664065_8593.JPEG 3
n01664065/n01664065_8613.JPEG 3
n01664065/n01664065_8619.JPEG 3
n01664065/n01664065_8624.JPEG 3
n01664065/n01664065_8629.JPEG 3
n01664065/n01664065_863.JPEG 3
n01664065/n01664065_8682.JPEG 3
n01664065/n01664065_869.JPEG 3
n01664065/n01664065_8690.JPEG 3
n01664065/n01664065_8705.JPEG 3
n01664065/n01664065_8710.JPEG 3
n01664065/n01664065_8732.JPEG 3
n01664065/n01664065_8736.JPEG 3
n01664065/n01664065_8759.JPEG 3
n01664065/n01664065_8783.JPEG 3
n01664065/n01664065_8823.JPEG 3
n01664065/n01664065_8824.JPEG 3
n01664065/n01664065_8830.JPEG 3
n01664065/n01664065_8879.JPEG 3
n01664065/n01664065_8915.JPEG 3
n01664065/n01664065_893.JPEG 3
n01664065/n01664065_8933.JPEG 3
n01664065/n01664065_8937.JPEG 3
n01664065/n01664065_8942.JPEG 3
n01664065/n01664065_8957.JPEG 3
n01664065/n01664065_8993.JPEG 3
n01664065/n01664065_8996.JPEG 3
n01664065/n01664065_8997.JPEG 3
n01664065/n01664065_900.JPEG 3
n01664065/n01664065_9014.JPEG 3
n01664065/n01664065_904.JPEG 3
n01664065/n01664065_9042.JPEG 3
n01664065/n01664065_9051.JPEG 3
n01664065/n01664065_9065.JPEG 3
n01664065/n01664065_9073.JPEG 3
n01664065/n01664065_9097.JPEG 3
n01664065/n01664065_9107.JPEG 3
n01664065/n01664065_911.JPEG 3
n01664065/n01664065_9123.JPEG 3
n01664065/n01664065_9133.JPEG 3
n01664065/n01664065_9138.JPEG 3
n01664065/n01664065_9142.JPEG 3
n01664065/n01664065_9154.JPEG 3
n01664065/n01664065_9160.JPEG 3
n01664065/n01664065_9169.JPEG 3
n01664065/n01664065_9185.JPEG 3
n01664065/n01664065_9190.JPEG 3
n01664065/n01664065_9202.JPEG 3
n01664065/n01664065_9210.JPEG 3
n01664065/n01664065_9219.JPEG 3
n01664065/n01664065_9234.JPEG 3
n01664065/n01664065_9240.JPEG 3
n01664065/n01664065_9270.JPEG 3
n01664065/n01664065_9274.JPEG 3
n01664065/n01664065_9281.JPEG 3
n01664065/n01664065_9290.JPEG 3
n01664065/n01664065_9302.JPEG 3
n01664065/n01664065_9306.JPEG 3
n01664065/n01664065_932.JPEG 3
n01664065/n01664065_9320.JPEG 3
n01664065/n01664065_9332.JPEG 3
n01664065/n01664065_9346.JPEG 3
n01664065/n01664065_935.JPEG 3
n01664065/n01664065_9358.JPEG 3
n01664065/n01664065_9380.JPEG 3
n01664065/n01664065_9382.JPEG 3
n01664065/n01664065_9388.JPEG 3
n01664065/n01664065_9410.JPEG 3
n01664065/n01664065_9413.JPEG 3
n01664065/n01664065_9435.JPEG 3
n01664065/n01664065_9437.JPEG 3
n01664065/n01664065_9454.JPEG 3
n01664065/n01664065_9473.JPEG 3
n01664065/n01664065_9479.JPEG 3
n01664065/n01664065_9489.JPEG 3
n01664065/n01664065_9500.JPEG 3
n01664065/n01664065_9519.JPEG 3
n01664065/n01664065_9523.JPEG 3
n01664065/n01664065_9536.JPEG 3
n01664065/n01664065_9548.JPEG 3
n01664065/n01664065_9559.JPEG 3
n01664065/n01664065_956.JPEG 3
n01664065/n01664065_9581.JPEG 3
n01664065/n01664065_9597.JPEG 3
n01664065/n01664065_9625.JPEG 3
n01664065/n01664065_9628.JPEG 3
n01664065/n01664065_963.JPEG 3
n01664065/n01664065_9633.JPEG 3
n01664065/n01664065_9646.JPEG 3
n01664065/n01664065_9655.JPEG 3
n01664065/n01664065_9688.JPEG 3
n01664065/n01664065_9717.JPEG 3
n01664065/n01664065_9720.JPEG 3
n01664065/n01664065_9760.JPEG 3
n01664065/n01664065_9786.JPEG 3
n01664065/n01664065_979.JPEG 3
n01664065/n01664065_9805.JPEG 3
n01664065/n01664065_9809.JPEG 3
n01664065/n01664065_9817.JPEG 3
n01664065/n01664065_9819.JPEG 3
n01664065/n01664065_9820.JPEG 3
n01664065/n01664065_9835.JPEG 3
n01664065/n01664065_9840.JPEG 3
n01664065/n01664065_9862.JPEG 3
n01664065/n01664065_9868.JPEG 3
n01664065/n01664065_9890.JPEG 3
n01664065/n01664065_9915.JPEG 3
n01664065/n01664065_997.JPEG 3
n01664065/n01664065_9972.JPEG 3
n01664065/n01664065_9981.JPEG 3
n01665541/n01665541_10021.JPEG 3
n01665541/n01665541_10037.JPEG 3
n01665541/n01665541_1006.JPEG 3
n01665541/n01665541_10065.JPEG 3
n01665541/n01665541_10083.JPEG 3
n01665541/n01665541_10087.JPEG 3
n01665541/n01665541_10137.JPEG 3
n01665541/n01665541_10188.JPEG 3
n01665541/n01665541_10212.JPEG 3
n01665541/n01665541_10219.JPEG 3
n01665541/n01665541_10222.JPEG 3
n01665541/n01665541_10230.JPEG 3
n01665541/n01665541_10235.JPEG 3
n01665541/n01665541_10297.JPEG 3
n01665541/n01665541_10305.JPEG 3
n01665541/n01665541_1032.JPEG 3
n01665541/n01665541_1037.JPEG 3
n01665541/n01665541_10371.JPEG 3
n01665541/n01665541_10405.JPEG 3
n01665541/n01665541_10415.JPEG 3
n01665541/n01665541_10440.JPEG 3
n01665541/n01665541_10450.JPEG 3
n01665541/n01665541_10466.JPEG 3
n01665541/n01665541_10484.JPEG 3
n01665541/n01665541_10493.JPEG 3
n01665541/n01665541_10505.JPEG 3
n01665541/n01665541_10509.JPEG 3
n01665541/n01665541_1055.JPEG 3
n01665541/n01665541_10552.JPEG 3
n01665541/n01665541_10577.JPEG 3
n01665541/n01665541_1058.JPEG 3
n01665541/n01665541_10586.JPEG 3
n01665541/n01665541_1059.JPEG 3
n01665541/n01665541_1064.JPEG 3
n01665541/n01665541_10645.JPEG 3
n01665541/n01665541_1065.JPEG 3
n01665541/n01665541_10670.JPEG 3
n01665541/n01665541_10697.JPEG 3
n01665541/n01665541_1071.JPEG 3
n01665541/n01665541_10749.JPEG 3
n01665541/n01665541_10763.JPEG 3
n01665541/n01665541_10793.JPEG 3
n01665541/n01665541_10817.JPEG 3
n01665541/n01665541_10855.JPEG 3
n01665541/n01665541_1087.JPEG 3
n01665541/n01665541_10878.JPEG 3
n01665541/n01665541_10898.JPEG 3
n01665541/n01665541_10924.JPEG 3
n01665541/n01665541_10949.JPEG 3
n01665541/n01665541_10997.JPEG 3
n01665541/n01665541_11.JPEG 3
n01665541/n01665541_11003.JPEG 3
n01665541/n01665541_11011.JPEG 3
n01665541/n01665541_11065.JPEG 3
n01665541/n01665541_11070.JPEG 3
n01665541/n01665541_1109.JPEG 3
n01665541/n01665541_11100.JPEG 3
n01665541/n01665541_11146.JPEG 3
n01665541/n01665541_11155.JPEG 3
n01665541/n01665541_11162.JPEG 3
n01665541/n01665541_11164.JPEG 3
n01665541/n01665541_11180.JPEG 3
n01665541/n01665541_112.JPEG 3
n01665541/n01665541_11212.JPEG 3
n01665541/n01665541_11220.JPEG 3
n01665541/n01665541_11250.JPEG 3
n01665541/n01665541_11266.JPEG 3
n01665541/n01665541_11299.JPEG 3
n01665541/n01665541_11301.JPEG 3
n01665541/n01665541_11323.JPEG 3
n01665541/n01665541_11421.JPEG 3
n01665541/n01665541_11432.JPEG 3
n01665541/n01665541_11444.JPEG 3
n01665541/n01665541_11456.JPEG 3
n01665541/n01665541_11496.JPEG 3
n01665541/n01665541_11501.JPEG 3
n01665541/n01665541_11539.JPEG 3
n01665541/n01665541_11546.JPEG 3
n01665541/n01665541_11557.JPEG 3
n01665541/n01665541_11560.JPEG 3
n01665541/n01665541_11589.JPEG 3
n01665541/n01665541_1160.JPEG 3
n01665541/n01665541_11605.JPEG 3
n01665541/n01665541_11613.JPEG 3
n01665541/n01665541_11615.JPEG 3
n01665541/n01665541_11640.JPEG 3
n01665541/n01665541_11660.JPEG 3
n01665541/n01665541_11663.JPEG 3
n01665541/n01665541_11683.JPEG 3
n01665541/n01665541_11700.JPEG 3
n01665541/n01665541_1176.JPEG 3
n01665541/n01665541_11776.JPEG 3
n01665541/n01665541_11808.JPEG 3
n01665541/n01665541_11818.JPEG 3
n01665541/n01665541_11819.JPEG 3
n01665541/n01665541_1182.JPEG 3
n01665541/n01665541_11847.JPEG 3
n01665541/n01665541_11887.JPEG 3
n01665541/n01665541_11893.JPEG 3
n01665541/n01665541_11907.JPEG 3
n01665541/n01665541_11914.JPEG 3
n01665541/n01665541_11938.JPEG 3
n01665541/n01665541_11939.JPEG 3
n01665541/n01665541_11947.JPEG 3
n01665541/n01665541_11966.JPEG 3
n01665541/n01665541_11967.JPEG 3
n01665541/n01665541_11969.JPEG 3
n01665541/n01665541_11990.JPEG 3
n01665541/n01665541_12.JPEG 3
n01665541/n01665541_12029.JPEG 3
n01665541/n01665541_12030.JPEG 3
n01665541/n01665541_12069.JPEG 3
n01665541/n01665541_12095.JPEG 3
n01665541/n01665541_12101.JPEG 3
n01665541/n01665541_12113.JPEG 3
n01665541/n01665541_1213.JPEG 3
n01665541/n01665541_12140.JPEG 3
n01665541/n01665541_12151.JPEG 3
n01665541/n01665541_12154.JPEG 3
n01665541/n01665541_12156.JPEG 3
n01665541/n01665541_12193.JPEG 3
n01665541/n01665541_1221.JPEG 3
n01665541/n01665541_12214.JPEG 3
n01665541/n01665541_1224.JPEG 3
n01665541/n01665541_12277.JPEG 3
n01665541/n01665541_12281.JPEG 3
n01665541/n01665541_12290.JPEG 3
n01665541/n01665541_12307.JPEG 3
n01665541/n01665541_12317.JPEG 3
n01665541/n01665541_12327.JPEG 3
n01665541/n01665541_12364.JPEG 3
n01665541/n01665541_12378.JPEG 3
n01665541/n01665541_12390.JPEG 3
n01665541/n01665541_12404.JPEG 3
n01665541/n01665541_12407.JPEG 3
n01665541/n01665541_12409.JPEG 3
n01665541/n01665541_12420.JPEG 3
n01665541/n01665541_12462.JPEG 3
n01665541/n01665541_12495.JPEG 3
n01665541/n01665541_12547.JPEG 3
n01665541/n01665541_12551.JPEG 3
n01665541/n01665541_12553.JPEG 3
n01665541/n01665541_12578.JPEG 3
n01665541/n01665541_12641.JPEG 3
n01665541/n01665541_1266.JPEG 3
n01665541/n01665541_12683.JPEG 3
n01665541/n01665541_12696.JPEG 3
n01665541/n01665541_12697.JPEG 3
n01665541/n01665541_12703.JPEG 3
n01665541/n01665541_12730.JPEG 3
n01665541/n01665541_12748.JPEG 3
n01665541/n01665541_12756.JPEG 3
n01665541/n01665541_12766.JPEG 3
n01665541/n01665541_12814.JPEG 3
n01665541/n01665541_12835.JPEG 3
n01665541/n01665541_12838.JPEG 3
n01665541/n01665541_12849.JPEG 3
n01665541/n01665541_1288.JPEG 3
n01665541/n01665541_12881.JPEG 3
n01665541/n01665541_12904.JPEG 3
n01665541/n01665541_12914.JPEG 3
n01665541/n01665541_12917.JPEG 3
n01665541/n01665541_12918.JPEG 3
n01665541/n01665541_12920.JPEG 3
n01665541/n01665541_12948.JPEG 3
n01665541/n01665541_12952.JPEG 3
n01665541/n01665541_1301.JPEG 3
n01665541/n01665541_13025.JPEG 3
n01665541/n01665541_13034.JPEG 3
n01665541/n01665541_13039.JPEG 3
n01665541/n01665541_1304.JPEG 3
n01665541/n01665541_13073.JPEG 3
n01665541/n01665541_13111.JPEG 3
n01665541/n01665541_13135.JPEG 3
n01665541/n01665541_13163.JPEG 3
n01665541/n01665541_13178.JPEG 3
n01665541/n01665541_13184.JPEG 3
n01665541/n01665541_13188.JPEG 3
n01665541/n01665541_1319.JPEG 3
n01665541/n01665541_13196.JPEG 3
n01665541/n01665541_13232.JPEG 3
n01665541/n01665541_13250.JPEG 3
n01665541/n01665541_13254.JPEG 3
n01665541/n01665541_13287.JPEG 3
n01665541/n01665541_13306.JPEG 3
n01665541/n01665541_13310.JPEG 3
n01665541/n01665541_13318.JPEG 3
n01665541/n01665541_13342.JPEG 3
n01665541/n01665541_13354.JPEG 3
n01665541/n01665541_1337.JPEG 3
n01665541/n01665541_13372.JPEG 3
n01665541/n01665541_13415.JPEG 3
n01665541/n01665541_13446.JPEG 3
n01665541/n01665541_13447.JPEG 3
n01665541/n01665541_13456.JPEG 3
n01665541/n01665541_135.JPEG 3
n01665541/n01665541_13546.JPEG 3
n01665541/n01665541_13549.JPEG 3
n01665541/n01665541_13580.JPEG 3
n01665541/n01665541_13581.JPEG 3
n01665541/n01665541_13583.JPEG 3
n01665541/n01665541_13606.JPEG 3
n01665541/n01665541_13618.JPEG 3
n01665541/n01665541_13630.JPEG 3
n01665541/n01665541_13695.JPEG 3
n01665541/n01665541_1376.JPEG 3
n01665541/n01665541_1380.JPEG 3
n01665541/n01665541_13804.JPEG 3
n01665541/n01665541_13806.JPEG 3
n01665541/n01665541_13887.JPEG 3
n01665541/n01665541_13892.JPEG 3
n01665541/n01665541_13924.JPEG 3
n01665541/n01665541_13935.JPEG 3
n01665541/n01665541_13942.JPEG 3
n01665541/n01665541_13948.JPEG 3
n01665541/n01665541_13958.JPEG 3
n01665541/n01665541_13966.JPEG 3
n01665541/n01665541_13980.JPEG 3
n01665541/n01665541_14004.JPEG 3
n01665541/n01665541_14027.JPEG 3
n01665541/n01665541_14031.JPEG 3
n01665541/n01665541_14034.JPEG 3
n01665541/n01665541_14061.JPEG 3
n01665541/n01665541_14119.JPEG 3
n01665541/n01665541_14152.JPEG 3
n01665541/n01665541_14170.JPEG 3
n01665541/n01665541_14172.JPEG 3
n01665541/n01665541_14184.JPEG 3
n01665541/n01665541_14201.JPEG 3
n01665541/n01665541_14216.JPEG 3
n01665541/n01665541_14217.JPEG 3
n01665541/n01665541_14246.JPEG 3
n01665541/n01665541_1433.JPEG 3
n01665541/n01665541_14331.JPEG 3
n01665541/n01665541_14349.JPEG 3
n01665541/n01665541_14368.JPEG 3
n01665541/n01665541_14387.JPEG 3
n01665541/n01665541_14397.JPEG 3
n01665541/n01665541_14408.JPEG 3
n01665541/n01665541_14409.JPEG 3
n01665541/n01665541_14426.JPEG 3
n01665541/n01665541_14436.JPEG 3
n01665541/n01665541_14441.JPEG 3
n01665541/n01665541_14443.JPEG 3
n01665541/n01665541_14461.JPEG 3
n01665541/n01665541_14512.JPEG 3
n01665541/n01665541_14524.JPEG 3
n01665541/n01665541_14531.JPEG 3
n01665541/n01665541_14545.JPEG 3
n01665541/n01665541_14548.JPEG 3
n01665541/n01665541_14565.JPEG 3
n01665541/n01665541_1457.JPEG 3
n01665541/n01665541_14572.JPEG 3
n01665541/n01665541_14617.JPEG 3
n01665541/n01665541_14645.JPEG 3
n01665541/n01665541_14689.JPEG 3
n01665541/n01665541_14692.JPEG 3
n01665541/n01665541_1470.JPEG 3
n01665541/n01665541_1475.JPEG 3
n01665541/n01665541_14769.JPEG 3
n01665541/n01665541_14802.JPEG 3
n01665541/n01665541_14831.JPEG 3
n01665541/n01665541_14840.JPEG 3
n01665541/n01665541_14854.JPEG 3
n01665541/n01665541_14866.JPEG 3
n01665541/n01665541_14868.JPEG 3
n01665541/n01665541_14878.JPEG 3
n01665541/n01665541_14920.JPEG 3
n01665541/n01665541_14962.JPEG 3
n01665541/n01665541_14978.JPEG 3
n01665541/n01665541_14987.JPEG 3
n01665541/n01665541_150.JPEG 3
n01665541/n01665541_15016.JPEG 3
n01665541/n01665541_15026.JPEG 3
n01665541/n01665541_15049.JPEG 3
n01665541/n01665541_15054.JPEG 3
n01665541/n01665541_15085.JPEG 3
n01665541/n01665541_15109.JPEG 3
n01665541/n01665541_15124.JPEG 3
n01665541/n01665541_15127.JPEG 3
n01665541/n01665541_15143.JPEG 3
n01665541/n01665541_15166.JPEG 3
n01665541/n01665541_15180.JPEG 3
n01665541/n01665541_15213.JPEG 3
n01665541/n01665541_15223.JPEG 3
n01665541/n01665541_15269.JPEG 3
n01665541/n01665541_1528.JPEG 3
n01665541/n01665541_15285.JPEG 3
n01665541/n01665541_15287.JPEG 3
n01665541/n01665541_15288.JPEG 3
n01665541/n01665541_15298.JPEG 3
n01665541/n01665541_15319.JPEG 3
n01665541/n01665541_1532.JPEG 3
n01665541/n01665541_15344.JPEG 3
n01665541/n01665541_15351.JPEG 3
n01665541/n01665541_1540.JPEG 3
n01665541/n01665541_15404.JPEG 3
n01665541/n01665541_15406.JPEG 3
n01665541/n01665541_1541.JPEG 3
n01665541/n01665541_1542.JPEG 3
n01665541/n01665541_15439.JPEG 3
n01665541/n01665541_15451.JPEG 3
n01665541/n01665541_15461.JPEG 3
n01665541/n01665541_15505.JPEG 3
n01665541/n01665541_15580.JPEG 3
n01665541/n01665541_1559.JPEG 3
n01665541/n01665541_1562.JPEG 3
n01665541/n01665541_15628.JPEG 3
n01665541/n01665541_15655.JPEG 3
n01665541/n01665541_15659.JPEG 3
n01665541/n01665541_15724.JPEG 3
n01665541/n01665541_15758.JPEG 3
n01665541/n01665541_1576.JPEG 3
n01665541/n01665541_15775.JPEG 3
n01665541/n01665541_15794.JPEG 3
n01665541/n01665541_15821.JPEG 3
n01665541/n01665541_15848.JPEG 3
n01665541/n01665541_15849.JPEG 3
n01665541/n01665541_15857.JPEG 3
n01665541/n01665541_15859.JPEG 3
n01665541/n01665541_15878.JPEG 3
n01665541/n01665541_15891.JPEG 3
n01665541/n01665541_15895.JPEG 3
n01665541/n01665541_15897.JPEG 3
n01665541/n01665541_1592.JPEG 3
n01665541/n01665541_15966.JPEG 3
n01665541/n01665541_15997.JPEG 3
n01665541/n01665541_16009.JPEG 3
n01665541/n01665541_1601.JPEG 3
n01665541/n01665541_16016.JPEG 3
n01665541/n01665541_16021.JPEG 3
n01665541/n01665541_16022.JPEG 3
n01665541/n01665541_16082.JPEG 3
n01665541/n01665541_16086.JPEG 3
n01665541/n01665541_1610.JPEG 3
n01665541/n01665541_16121.JPEG 3
n01665541/n01665541_1615.JPEG 3
n01665541/n01665541_16152.JPEG 3
n01665541/n01665541_16199.JPEG 3
n01665541/n01665541_16201.JPEG 3
n01665541/n01665541_16230.JPEG 3
n01665541/n01665541_16273.JPEG 3
n01665541/n01665541_16300.JPEG 3
n01665541/n01665541_16370.JPEG 3
n01665541/n01665541_16404.JPEG 3
n01665541/n01665541_16406.JPEG 3
n01665541/n01665541_16419.JPEG 3
n01665541/n01665541_16421.JPEG 3
n01665541/n01665541_16437.JPEG 3
n01665541/n01665541_16439.JPEG 3
n01665541/n01665541_16457.JPEG 3
n01665541/n01665541_16470.JPEG 3
n01665541/n01665541_16477.JPEG 3
n01665541/n01665541_16478.JPEG 3
n01665541/n01665541_16510.JPEG 3
n01665541/n01665541_16540.JPEG 3
n01665541/n01665541_16554.JPEG 3
n01665541/n01665541_16556.JPEG 3
n01665541/n01665541_16596.JPEG 3
n01665541/n01665541_16605.JPEG 3
n01665541/n01665541_16615.JPEG 3
n01665541/n01665541_16616.JPEG 3
n01665541/n01665541_16647.JPEG 3
n01665541/n01665541_16660.JPEG 3
n01665541/n01665541_16688.JPEG 3
n01665541/n01665541_1669.JPEG 3
n01665541/n01665541_16700.JPEG 3
n01665541/n01665541_1671.JPEG 3
n01665541/n01665541_16717.JPEG 3
n01665541/n01665541_16719.JPEG 3
n01665541/n01665541_16732.JPEG 3
n01665541/n01665541_1677.JPEG 3
n01665541/n01665541_16785.JPEG 3
n01665541/n01665541_16823.JPEG 3
n01665541/n01665541_16830.JPEG 3
n01665541/n01665541_16850.JPEG 3
n01665541/n01665541_16884.JPEG 3
n01665541/n01665541_16898.JPEG 3
n01665541/n01665541_16911.JPEG 3
n01665541/n01665541_1692.JPEG 3
n01665541/n01665541_16978.JPEG 3
n01665541/n01665541_17000.JPEG 3
n01665541/n01665541_17058.JPEG 3
n01665541/n01665541_1706.JPEG 3
n01665541/n01665541_17100.JPEG 3
n01665541/n01665541_17106.JPEG 3
n01665541/n01665541_17108.JPEG 3
n01665541/n01665541_17112.JPEG 3
n01665541/n01665541_17128.JPEG 3
n01665541/n01665541_17150.JPEG 3
n01665541/n01665541_17163.JPEG 3
n01665541/n01665541_17169.JPEG 3
n01665541/n01665541_17175.JPEG 3
n01665541/n01665541_17184.JPEG 3
n01665541/n01665541_17195.JPEG 3
n01665541/n01665541_17202.JPEG 3
n01665541/n01665541_17228.JPEG 3
n01665541/n01665541_17232.JPEG 3
n01665541/n01665541_17255.JPEG 3
n01665541/n01665541_17269.JPEG 3
n01665541/n01665541_1727.JPEG 3
n01665541/n01665541_17287.JPEG 3
n01665541/n01665541_17310.JPEG 3
n01665541/n01665541_17343.JPEG 3
n01665541/n01665541_1735.JPEG 3
n01665541/n01665541_17370.JPEG 3
n01665541/n01665541_17387.JPEG 3
n01665541/n01665541_17389.JPEG 3
n01665541/n01665541_1744.JPEG 3
n01665541/n01665541_17523.JPEG 3
n01665541/n01665541_17531.JPEG 3
n01665541/n01665541_17545.JPEG 3
n01665541/n01665541_17594.JPEG 3
n01665541/n01665541_17596.JPEG 3
n01665541/n01665541_1760.JPEG 3
n01665541/n01665541_1763.JPEG 3
n01665541/n01665541_17632.JPEG 3
n01665541/n01665541_17662.JPEG 3
n01665541/n01665541_17696.JPEG 3
n01665541/n01665541_17708.JPEG 3
n01665541/n01665541_17714.JPEG 3
n01665541/n01665541_17741.JPEG 3
n01665541/n01665541_1777.JPEG 3
n01665541/n01665541_17771.JPEG 3
n01665541/n01665541_178.JPEG 3
n01665541/n01665541_17813.JPEG 3
n01665541/n01665541_17834.JPEG 3
n01665541/n01665541_17889.JPEG 3
n01665541/n01665541_17909.JPEG 3
n01665541/n01665541_18012.JPEG 3
n01665541/n01665541_1808.JPEG 3
n01665541/n01665541_18105.JPEG 3
n01665541/n01665541_1813.JPEG 3
n01665541/n01665541_18204.JPEG 3
n01665541/n01665541_18249.JPEG 3
n01665541/n01665541_18281.JPEG 3
n01665541/n01665541_18284.JPEG 3
n01665541/n01665541_18298.JPEG 3
n01665541/n01665541_18332.JPEG 3
n01665541/n01665541_18379.JPEG 3
n01665541/n01665541_18426.JPEG 3
n01665541/n01665541_18462.JPEG 3
n01665541/n01665541_18481.JPEG 3
n01665541/n01665541_18488.JPEG 3
n01665541/n01665541_18506.JPEG 3
n01665541/n01665541_1856.JPEG 3
n01665541/n01665541_18569.JPEG 3
n01665541/n01665541_18599.JPEG 3
n01665541/n01665541_18745.JPEG 3
n01665541/n01665541_18750.JPEG 3
n01665541/n01665541_188.JPEG 3
n01665541/n01665541_1880.JPEG 3
n01665541/n01665541_18826.JPEG 3
n01665541/n01665541_18919.JPEG 3
n01665541/n01665541_18921.JPEG 3
n01665541/n01665541_18934.JPEG 3
n01665541/n01665541_1903.JPEG 3
n01665541/n01665541_19042.JPEG 3
n01665541/n01665541_19101.JPEG 3
n01665541/n01665541_19145.JPEG 3
n01665541/n01665541_19170.JPEG 3
n01665541/n01665541_19227.JPEG 3
n01665541/n01665541_19271.JPEG 3
n01665541/n01665541_19336.JPEG 3
n01665541/n01665541_19344.JPEG 3
n01665541/n01665541_19357.JPEG 3
n01665541/n01665541_19375.JPEG 3
n01665541/n01665541_194.JPEG 3
n01665541/n01665541_19405.JPEG 3
n01665541/n01665541_19441.JPEG 3
n01665541/n01665541_19514.JPEG 3
n01665541/n01665541_19558.JPEG 3
n01665541/n01665541_1958.JPEG 3
n01665541/n01665541_1959.JPEG 3
n01665541/n01665541_196.JPEG 3
n01665541/n01665541_1966.JPEG 3
n01665541/n01665541_19662.JPEG 3
n01665541/n01665541_1970.JPEG 3
n01665541/n01665541_19751.JPEG 3
n01665541/n01665541_19784.JPEG 3
n01665541/n01665541_19842.JPEG 3
n01665541/n01665541_19850.JPEG 3
n01665541/n01665541_19894.JPEG 3
n01665541/n01665541_19905.JPEG 3
n01665541/n01665541_19922.JPEG 3
n01665541/n01665541_19978.JPEG 3
n01665541/n01665541_1998.JPEG 3
n01665541/n01665541_20058.JPEG 3
n01665541/n01665541_2008.JPEG 3
n01665541/n01665541_2009.JPEG 3
n01665541/n01665541_20092.JPEG 3
n01665541/n01665541_20097.JPEG 3
n01665541/n01665541_20155.JPEG 3
n01665541/n01665541_20277.JPEG 3
n01665541/n01665541_20308.JPEG 3
n01665541/n01665541_20389.JPEG 3
n01665541/n01665541_20416.JPEG 3
n01665541/n01665541_20440.JPEG 3
n01665541/n01665541_20477.JPEG 3
n01665541/n01665541_20559.JPEG 3
n01665541/n01665541_20566.JPEG 3
n01665541/n01665541_2072.JPEG 3
n01665541/n01665541_20726.JPEG 3
n01665541/n01665541_2073.JPEG 3
n01665541/n01665541_2079.JPEG 3
n01665541/n01665541_20802.JPEG 3
n01665541/n01665541_2082.JPEG 3
n01665541/n01665541_20829.JPEG 3
n01665541/n01665541_20846.JPEG 3
n01665541/n01665541_20849.JPEG 3
n01665541/n01665541_2086.JPEG 3
n01665541/n01665541_20861.JPEG 3
n01665541/n01665541_2087.JPEG 3
n01665541/n01665541_20882.JPEG 3
n01665541/n01665541_20893.JPEG 3
n01665541/n01665541_20895.JPEG 3
n01665541/n01665541_20954.JPEG 3
n01665541/n01665541_21015.JPEG 3
n01665541/n01665541_21082.JPEG 3
n01665541/n01665541_21091.JPEG 3
n01665541/n01665541_21106.JPEG 3
n01665541/n01665541_2111.JPEG 3
n01665541/n01665541_21128.JPEG 3
n01665541/n01665541_21190.JPEG 3
n01665541/n01665541_21192.JPEG 3
n01665541/n01665541_21268.JPEG 3
n01665541/n01665541_2132.JPEG 3
n01665541/n01665541_21333.JPEG 3
n01665541/n01665541_21378.JPEG 3
n01665541/n01665541_21405.JPEG 3
n01665541/n01665541_21420.JPEG 3
n01665541/n01665541_2146.JPEG 3
n01665541/n01665541_21460.JPEG 3
n01665541/n01665541_21469.JPEG 3
n01665541/n01665541_21571.JPEG 3
n01665541/n01665541_2159.JPEG 3
n01665541/n01665541_21700.JPEG 3
n01665541/n01665541_2174.JPEG 3
n01665541/n01665541_21853.JPEG 3
n01665541/n01665541_21861.JPEG 3
n01665541/n01665541_2187.JPEG 3
n01665541/n01665541_22007.JPEG 3
n01665541/n01665541_2210.JPEG 3
n01665541/n01665541_2214.JPEG 3
n01665541/n01665541_22146.JPEG 3
n01665541/n01665541_22247.JPEG 3
n01665541/n01665541_2237.JPEG 3
n01665541/n01665541_22409.JPEG 3
n01665541/n01665541_22524.JPEG 3
n01665541/n01665541_2253.JPEG 3
n01665541/n01665541_22765.JPEG 3
n01665541/n01665541_22817.JPEG 3
n01665541/n01665541_22842.JPEG 3
n01665541/n01665541_2289.JPEG 3
n01665541/n01665541_23007.JPEG 3
n01665541/n01665541_231.JPEG 3
n01665541/n01665541_2320.JPEG 3
n01665541/n01665541_23383.JPEG 3
n01665541/n01665541_23410.JPEG 3
n01665541/n01665541_2346.JPEG 3
n01665541/n01665541_23471.JPEG 3
n01665541/n01665541_23608.JPEG 3
n01665541/n01665541_23619.JPEG 3
n01665541/n01665541_23783.JPEG 3
n01665541/n01665541_2386.JPEG 3
n01665541/n01665541_23879.JPEG 3
n01665541/n01665541_23936.JPEG 3
n01665541/n01665541_24.JPEG 3
n01665541/n01665541_2421.JPEG 3
n01665541/n01665541_2428.JPEG 3
n01665541/n01665541_24305.JPEG 3
n01665541/n01665541_2432.JPEG 3
n01665541/n01665541_244.JPEG 3
n01665541/n01665541_24457.JPEG 3
n01665541/n01665541_2446.JPEG 3
n01665541/n01665541_24466.JPEG 3
n01665541/n01665541_24472.JPEG 3
n01665541/n01665541_2450.JPEG 3
n01665541/n01665541_24652.JPEG 3
n01665541/n01665541_24666.JPEG 3
n01665541/n01665541_2467.JPEG 3
n01665541/n01665541_2469.JPEG 3
n01665541/n01665541_24698.JPEG 3
n01665541/n01665541_24783.JPEG 3
n01665541/n01665541_24809.JPEG 3
n01665541/n01665541_24841.JPEG 3
n01665541/n01665541_24895.JPEG 3
n01665541/n01665541_24980.JPEG 3
n01665541/n01665541_2499.JPEG 3
n01665541/n01665541_25042.JPEG 3
n01665541/n01665541_2506.JPEG 3
n01665541/n01665541_25071.JPEG 3
n01665541/n01665541_25183.JPEG 3
n01665541/n01665541_2533.JPEG 3
n01665541/n01665541_25331.JPEG 3
n01665541/n01665541_25355.JPEG 3
n01665541/n01665541_25410.JPEG 3
n01665541/n01665541_25530.JPEG 3
n01665541/n01665541_25538.JPEG 3
n01665541/n01665541_2556.JPEG 3
n01665541/n01665541_2568.JPEG 3
n01665541/n01665541_2571.JPEG 3
n01665541/n01665541_25755.JPEG 3
n01665541/n01665541_2577.JPEG 3
n01665541/n01665541_25783.JPEG 3
n01665541/n01665541_25874.JPEG 3
n01665541/n01665541_260.JPEG 3
n01665541/n01665541_26138.JPEG 3
n01665541/n01665541_26139.JPEG 3
n01665541/n01665541_26152.JPEG 3
n01665541/n01665541_26183.JPEG 3
n01665541/n01665541_2623.JPEG 3
n01665541/n01665541_26285.JPEG 3
n01665541/n01665541_26297.JPEG 3
n01665541/n01665541_26320.JPEG 3
n01665541/n01665541_26480.JPEG 3
n01665541/n01665541_2649.JPEG 3
n01665541/n01665541_26521.JPEG 3
n01665541/n01665541_26600.JPEG 3
n01665541/n01665541_26657.JPEG 3
n01665541/n01665541_26672.JPEG 3
n01665541/n01665541_26698.JPEG 3
n01665541/n01665541_26743.JPEG 3
n01665541/n01665541_26770.JPEG 3
n01665541/n01665541_2680.JPEG 3
n01665541/n01665541_26807.JPEG 3
n01665541/n01665541_26865.JPEG 3
n01665541/n01665541_26947.JPEG 3
n01665541/n01665541_26959.JPEG 3
n01665541/n01665541_26982.JPEG 3
n01665541/n01665541_26996.JPEG 3
n01665541/n01665541_27020.JPEG 3
n01665541/n01665541_27080.JPEG 3
n01665541/n01665541_27082.JPEG 3
n01665541/n01665541_2710.JPEG 3
n01665541/n01665541_27103.JPEG 3
n01665541/n01665541_27104.JPEG 3
n01665541/n01665541_27164.JPEG 3
n01665541/n01665541_2726.JPEG 3
n01665541/n01665541_27287.JPEG 3
n01665541/n01665541_273.JPEG 3
n01665541/n01665541_27356.JPEG 3
n01665541/n01665541_2736.JPEG 3
n01665541/n01665541_27410.JPEG 3
n01665541/n01665541_27419.JPEG 3
n01665541/n01665541_27441.JPEG 3
n01665541/n01665541_27529.JPEG 3
n01665541/n01665541_27566.JPEG 3
n01665541/n01665541_2762.JPEG 3
n01665541/n01665541_27658.JPEG 3
n01665541/n01665541_277.JPEG 3
n01665541/n01665541_27799.JPEG 3
n01665541/n01665541_2795.JPEG 3
n01665541/n01665541_28020.JPEG 3
n01665541/n01665541_28073.JPEG 3
n01665541/n01665541_28110.JPEG 3
n01665541/n01665541_28157.JPEG 3
n01665541/n01665541_2831.JPEG 3
n01665541/n01665541_2835.JPEG 3
n01665541/n01665541_28396.JPEG 3
n01665541/n01665541_28483.JPEG 3
n01665541/n01665541_28647.JPEG 3
n01665541/n01665541_28698.JPEG 3
n01665541/n01665541_28813.JPEG 3
n01665541/n01665541_28836.JPEG 3
n01665541/n01665541_28858.JPEG 3
n01665541/n01665541_28979.JPEG 3
n01665541/n01665541_29.JPEG 3
n01665541/n01665541_29088.JPEG 3
n01665541/n01665541_29138.JPEG 3
n01665541/n01665541_29368.JPEG 3
n01665541/n01665541_29408.JPEG 3
n01665541/n01665541_29438.JPEG 3
n01665541/n01665541_29495.JPEG 3
n01665541/n01665541_29504.JPEG 3
n01665541/n01665541_29551.JPEG 3
n01665541/n01665541_29585.JPEG 3
n01665541/n01665541_29602.JPEG 3
n01665541/n01665541_2969.JPEG 3
n01665541/n01665541_29734.JPEG 3
n01665541/n01665541_2975.JPEG 3
n01665541/n01665541_29778.JPEG 3
n01665541/n01665541_29843.JPEG 3
n01665541/n01665541_29900.JPEG 3
n01665541/n01665541_29935.JPEG 3
n01665541/n01665541_29939.JPEG 3
n01665541/n01665541_29962.JPEG 3
n01665541/n01665541_30008.JPEG 3
n01665541/n01665541_3002.JPEG 3
n01665541/n01665541_30058.JPEG 3
n01665541/n01665541_301.JPEG 3
n01665541/n01665541_30130.JPEG 3
n01665541/n01665541_30145.JPEG 3
n01665541/n01665541_30251.JPEG 3
n01665541/n01665541_30365.JPEG 3
n01665541/n01665541_30375.JPEG 3
n01665541/n01665541_30399.JPEG 3
n01665541/n01665541_30420.JPEG 3
n01665541/n01665541_30556.JPEG 3
n01665541/n01665541_30645.JPEG 3
n01665541/n01665541_30816.JPEG 3
n01665541/n01665541_30971.JPEG 3
n01665541/n01665541_3108.JPEG 3
n01665541/n01665541_31127.JPEG 3
n01665541/n01665541_31159.JPEG 3
n01665541/n01665541_31173.JPEG 3
n01665541/n01665541_31196.JPEG 3
n01665541/n01665541_31218.JPEG 3
n01665541/n01665541_31296.JPEG 3
n01665541/n01665541_3130.JPEG 3
n01665541/n01665541_31317.JPEG 3
n01665541/n01665541_31347.JPEG 3
n01665541/n01665541_31357.JPEG 3
n01665541/n01665541_3139.JPEG 3
n01665541/n01665541_31406.JPEG 3
n01665541/n01665541_31411.JPEG 3
n01665541/n01665541_31446.JPEG 3
n01665541/n01665541_31580.JPEG 3
n01665541/n01665541_31618.JPEG 3
n01665541/n01665541_3170.JPEG 3
n01665541/n01665541_31844.JPEG 3
n01665541/n01665541_31916.JPEG 3
n01665541/n01665541_31963.JPEG 3
n01665541/n01665541_32171.JPEG 3
n01665541/n01665541_3219.JPEG 3
n01665541/n01665541_32233.JPEG 3
n01665541/n01665541_32271.JPEG 3
n01665541/n01665541_32303.JPEG 3
n01665541/n01665541_3232.JPEG 3
n01665541/n01665541_32337.JPEG 3
n01665541/n01665541_324.JPEG 3
n01665541/n01665541_32405.JPEG 3
n01665541/n01665541_32447.JPEG 3
n01665541/n01665541_32492.JPEG 3
n01665541/n01665541_32493.JPEG 3
n01665541/n01665541_3254.JPEG 3
n01665541/n01665541_3265.JPEG 3
n01665541/n01665541_32708.JPEG 3
n01665541/n01665541_32729.JPEG 3
n01665541/n01665541_32754.JPEG 3
n01665541/n01665541_3277.JPEG 3
n01665541/n01665541_3281.JPEG 3
n01665541/n01665541_32821.JPEG 3
n01665541/n01665541_32886.JPEG 3
n01665541/n01665541_32899.JPEG 3
n01665541/n01665541_32930.JPEG 3
n01665541/n01665541_3295.JPEG 3
n01665541/n01665541_33005.JPEG 3
n01665541/n01665541_33007.JPEG 3
n01665541/n01665541_33027.JPEG 3
n01665541/n01665541_3307.JPEG 3
n01665541/n01665541_33077.JPEG 3
n01665541/n01665541_33125.JPEG 3
n01665541/n01665541_33161.JPEG 3
n01665541/n01665541_33191.JPEG 3
n01665541/n01665541_33237.JPEG 3
n01665541/n01665541_33242.JPEG 3
n01665541/n01665541_33309.JPEG 3
n01665541/n01665541_33317.JPEG 3
n01665541/n01665541_33327.JPEG 3
n01665541/n01665541_33330.JPEG 3
n01665541/n01665541_33359.JPEG 3
n01665541/n01665541_33361.JPEG 3
n01665541/n01665541_33491.JPEG 3
n01665541/n01665541_33708.JPEG 3
n01665541/n01665541_33712.JPEG 3
n01665541/n01665541_33714.JPEG 3
n01665541/n01665541_33811.JPEG 3
n01665541/n01665541_33919.JPEG 3
n01665541/n01665541_33981.JPEG 3
n01665541/n01665541_33997.JPEG 3
n01665541/n01665541_34038.JPEG 3
n01665541/n01665541_34048.JPEG 3
n01665541/n01665541_34075.JPEG 3
n01665541/n01665541_3412.JPEG 3
n01665541/n01665541_34184.JPEG 3
n01665541/n01665541_34331.JPEG 3
n01665541/n01665541_34350.JPEG 3
n01665541/n01665541_34380.JPEG 3
n01665541/n01665541_3440.JPEG 3
n01665541/n01665541_34428.JPEG 3
n01665541/n01665541_34467.JPEG 3
n01665541/n01665541_34477.JPEG 3
n01665541/n01665541_34515.JPEG 3
n01665541/n01665541_34531.JPEG 3
n01665541/n01665541_34556.JPEG 3
n01665541/n01665541_34608.JPEG 3
n01665541/n01665541_34650.JPEG 3
n01665541/n01665541_34662.JPEG 3
n01665541/n01665541_3474.JPEG 3
n01665541/n01665541_34773.JPEG 3
n01665541/n01665541_3480.JPEG 3
n01665541/n01665541_34820.JPEG 3
n01665541/n01665541_3498.JPEG 3
n01665541/n01665541_35031.JPEG 3
n01665541/n01665541_35034.JPEG 3
n01665541/n01665541_35062.JPEG 3
n01665541/n01665541_3510.JPEG 3
n01665541/n01665541_35124.JPEG 3
n01665541/n01665541_352.JPEG 3
n01665541/n01665541_35220.JPEG 3
n01665541/n01665541_35262.JPEG 3
n01665541/n01665541_35360.JPEG 3
n01665541/n01665541_35388.JPEG 3
n01665541/n01665541_35418.JPEG 3
n01665541/n01665541_35462.JPEG 3
n01665541/n01665541_35482.JPEG 3
n01665541/n01665541_35523.JPEG 3
n01665541/n01665541_3556.JPEG 3
n01665541/n01665541_35588.JPEG 3
n01665541/n01665541_35601.JPEG 3
n01665541/n01665541_35658.JPEG 3
n01665541/n01665541_35662.JPEG 3
n01665541/n01665541_35679.JPEG 3
n01665541/n01665541_3568.JPEG 3
n01665541/n01665541_35873.JPEG 3
n01665541/n01665541_36019.JPEG 3
n01665541/n01665541_36106.JPEG 3
n01665541/n01665541_36196.JPEG 3
n01665541/n01665541_36198.JPEG 3
n01665541/n01665541_36239.JPEG 3
n01665541/n01665541_3629.JPEG 3
n01665541/n01665541_36292.JPEG 3
n01665541/n01665541_36349.JPEG 3
n01665541/n01665541_36362.JPEG 3
n01665541/n01665541_36464.JPEG 3
n01665541/n01665541_3648.JPEG 3
n01665541/n01665541_3655.JPEG 3
n01665541/n01665541_36595.JPEG 3
n01665541/n01665541_36642.JPEG 3
n01665541/n01665541_36653.JPEG 3
n01665541/n01665541_3685.JPEG 3
n01665541/n01665541_3692.JPEG 3
n01665541/n01665541_36927.JPEG 3
n01665541/n01665541_36994.JPEG 3
n01665541/n01665541_37045.JPEG 3
n01665541/n01665541_37062.JPEG 3
n01665541/n01665541_3713.JPEG 3
n01665541/n01665541_37187.JPEG 3
n01665541/n01665541_37208.JPEG 3
n01665541/n01665541_3735.JPEG 3
n01665541/n01665541_3737.JPEG 3
n01665541/n01665541_374.JPEG 3
n01665541/n01665541_37487.JPEG 3
n01665541/n01665541_37532.JPEG 3
n01665541/n01665541_37534.JPEG 3
n01665541/n01665541_37546.JPEG 3
n01665541/n01665541_37566.JPEG 3
n01665541/n01665541_37606.JPEG 3
n01665541/n01665541_37613.JPEG 3
n01665541/n01665541_37702.JPEG 3
n01665541/n01665541_37776.JPEG 3
n01665541/n01665541_37802.JPEG 3
n01665541/n01665541_37824.JPEG 3
n01665541/n01665541_37844.JPEG 3
n01665541/n01665541_3796.JPEG 3
n01665541/n01665541_380.JPEG 3
n01665541/n01665541_38054.JPEG 3
n01665541/n01665541_38094.JPEG 3
n01665541/n01665541_38313.JPEG 3
n01665541/n01665541_3844.JPEG 3
n01665541/n01665541_38456.JPEG 3
n01665541/n01665541_38466.JPEG 3
n01665541/n01665541_3851.JPEG 3
n01665541/n01665541_38561.JPEG 3
n01665541/n01665541_38563.JPEG 3
n01665541/n01665541_38578.JPEG 3
n01665541/n01665541_38650.JPEG 3
n01665541/n01665541_3873.JPEG 3
n01665541/n01665541_38738.JPEG 3
n01665541/n01665541_38795.JPEG 3
n01665541/n01665541_38819.JPEG 3
n01665541/n01665541_3887.JPEG 3
n01665541/n01665541_38891.JPEG 3
n01665541/n01665541_38898.JPEG 3
n01665541/n01665541_3892.JPEG 3
n01665541/n01665541_38989.JPEG 3
n01665541/n01665541_3899.JPEG 3
n01665541/n01665541_39019.JPEG 3
n01665541/n01665541_3902.JPEG 3
n01665541/n01665541_3903.JPEG 3
n01665541/n01665541_3912.JPEG 3
n01665541/n01665541_3913.JPEG 3
n01665541/n01665541_39143.JPEG 3
n01665541/n01665541_39158.JPEG 3
n01665541/n01665541_39239.JPEG 3
n01665541/n01665541_39282.JPEG 3
n01665541/n01665541_39323.JPEG 3
n01665541/n01665541_39381.JPEG 3
n01665541/n01665541_3939.JPEG 3
n01665541/n01665541_3950.JPEG 3
n01665541/n01665541_3953.JPEG 3
n01665541/n01665541_39557.JPEG 3
n01665541/n01665541_3963.JPEG 3
n01665541/n01665541_39633.JPEG 3
n01665541/n01665541_39738.JPEG 3
n01665541/n01665541_39789.JPEG 3
n01665541/n01665541_3979.JPEG 3
n01665541/n01665541_39803.JPEG 3
n01665541/n01665541_39845.JPEG 3
n01665541/n01665541_3987.JPEG 3
n01665541/n01665541_3991.JPEG 3
n01665541/n01665541_40046.JPEG 3
n01665541/n01665541_40086.JPEG 3
n01665541/n01665541_4016.JPEG 3
n01665541/n01665541_4028.JPEG 3
n01665541/n01665541_40395.JPEG 3
n01665541/n01665541_40414.JPEG 3
n01665541/n01665541_40419.JPEG 3
n01665541/n01665541_40463.JPEG 3
n01665541/n01665541_40520.JPEG 3
n01665541/n01665541_4064.JPEG 3
n01665541/n01665541_4066.JPEG 3
n01665541/n01665541_40663.JPEG 3
n01665541/n01665541_40668.JPEG 3
n01665541/n01665541_40672.JPEG 3
n01665541/n01665541_40724.JPEG 3
n01665541/n01665541_40728.JPEG 3
n01665541/n01665541_40758.JPEG 3
n01665541/n01665541_40769.JPEG 3
n01665541/n01665541_40803.JPEG 3
n01665541/n01665541_4094.JPEG 3
n01665541/n01665541_41009.JPEG 3
n01665541/n01665541_4107.JPEG 3
n01665541/n01665541_41148.JPEG 3
n01665541/n01665541_41264.JPEG 3
n01665541/n01665541_41345.JPEG 3
n01665541/n01665541_41403.JPEG 3
n01665541/n01665541_41442.JPEG 3
n01665541/n01665541_4152.JPEG 3
n01665541/n01665541_41531.JPEG 3
n01665541/n01665541_41583.JPEG 3
n01665541/n01665541_41758.JPEG 3
n01665541/n01665541_42.JPEG 3
n01665541/n01665541_4212.JPEG 3
n01665541/n01665541_42233.JPEG 3
n01665541/n01665541_4227.JPEG 3
n01665541/n01665541_423.JPEG 3
n01665541/n01665541_42307.JPEG 3
n01665541/n01665541_42310.JPEG 3
n01665541/n01665541_42357.JPEG 3
n01665541/n01665541_42391.JPEG 3
n01665541/n01665541_4242.JPEG 3
n01665541/n01665541_42508.JPEG 3
n01665541/n01665541_42552.JPEG 3
n01665541/n01665541_4259.JPEG 3
n01665541/n01665541_42758.JPEG 3
n01665541/n01665541_4276.JPEG 3
n01665541/n01665541_42922.JPEG 3
n01665541/n01665541_42946.JPEG 3
n01665541/n01665541_42979.JPEG 3
n01665541/n01665541_43193.JPEG 3
n01665541/n01665541_432.JPEG 3
n01665541/n01665541_43377.JPEG 3
n01665541/n01665541_43414.JPEG 3
n01665541/n01665541_43424.JPEG 3
n01665541/n01665541_4344.JPEG 3
n01665541/n01665541_43476.JPEG 3
n01665541/n01665541_43506.JPEG 3
n01665541/n01665541_43507.JPEG 3
n01665541/n01665541_43530.JPEG 3
n01665541/n01665541_43601.JPEG 3
n01665541/n01665541_43644.JPEG 3
n01665541/n01665541_4366.JPEG 3
n01665541/n01665541_43818.JPEG 3
n01665541/n01665541_43844.JPEG 3
n01665541/n01665541_4388.JPEG 3
n01665541/n01665541_43884.JPEG 3
n01665541/n01665541_43977.JPEG 3
n01665541/n01665541_43990.JPEG 3
n01665541/n01665541_44032.JPEG 3
n01665541/n01665541_44044.JPEG 3
n01665541/n01665541_442.JPEG 3
n01665541/n01665541_446.JPEG 3
n01665541/n01665541_4465.JPEG 3
n01665541/n01665541_4490.JPEG 3
n01665541/n01665541_452.JPEG 3
n01665541/n01665541_4526.JPEG 3
n01665541/n01665541_4550.JPEG 3
n01665541/n01665541_4573.JPEG 3
n01665541/n01665541_4589.JPEG 3
n01665541/n01665541_4606.JPEG 3
n01665541/n01665541_4625.JPEG 3
n01665541/n01665541_4667.JPEG 3
n01665541/n01665541_4676.JPEG 3
n01665541/n01665541_469.JPEG 3
n01665541/n01665541_4700.JPEG 3
n01665541/n01665541_4701.JPEG 3
n01665541/n01665541_4714.JPEG 3
n01665541/n01665541_4724.JPEG 3
n01665541/n01665541_4745.JPEG 3
n01665541/n01665541_4824.JPEG 3
n01665541/n01665541_4825.JPEG 3
n01665541/n01665541_4851.JPEG 3
n01665541/n01665541_4868.JPEG 3
n01665541/n01665541_4877.JPEG 3
n01665541/n01665541_4900.JPEG 3
n01665541/n01665541_4902.JPEG 3
n01665541/n01665541_4911.JPEG 3
n01665541/n01665541_4921.JPEG 3
n01665541/n01665541_4935.JPEG 3
n01665541/n01665541_4942.JPEG 3
n01665541/n01665541_4947.JPEG 3
n01665541/n01665541_4953.JPEG 3
n01665541/n01665541_4960.JPEG 3
n01665541/n01665541_4977.JPEG 3
n01665541/n01665541_4985.JPEG 3
n01665541/n01665541_5001.JPEG 3
n01665541/n01665541_5031.JPEG 3
n01665541/n01665541_5049.JPEG 3
n01665541/n01665541_5054.JPEG 3
n01665541/n01665541_5093.JPEG 3
n01665541/n01665541_5109.JPEG 3
n01665541/n01665541_5121.JPEG 3
n01665541/n01665541_5141.JPEG 3
n01665541/n01665541_5158.JPEG 3
n01665541/n01665541_5162.JPEG 3
n01665541/n01665541_5168.JPEG 3
n01665541/n01665541_5178.JPEG 3
n01665541/n01665541_5204.JPEG 3
n01665541/n01665541_5227.JPEG 3
n01665541/n01665541_5231.JPEG 3
n01665541/n01665541_5232.JPEG 3
n01665541/n01665541_5235.JPEG 3
n01665541/n01665541_5239.JPEG 3
n01665541/n01665541_5243.JPEG 3
n01665541/n01665541_5266.JPEG 3
n01665541/n01665541_5269.JPEG 3
n01665541/n01665541_5279.JPEG 3
n01665541/n01665541_5287.JPEG 3
n01665541/n01665541_5288.JPEG 3
n01665541/n01665541_5289.JPEG 3
n01665541/n01665541_5291.JPEG 3
n01665541/n01665541_5303.JPEG 3
n01665541/n01665541_5334.JPEG 3
n01665541/n01665541_5335.JPEG 3
n01665541/n01665541_5345.JPEG 3
n01665541/n01665541_5347.JPEG 3
n01665541/n01665541_5377.JPEG 3
n01665541/n01665541_5386.JPEG 3
n01665541/n01665541_5402.JPEG 3
n01665541/n01665541_5408.JPEG 3
n01665541/n01665541_5423.JPEG 3
n01665541/n01665541_5431.JPEG 3
n01665541/n01665541_5435.JPEG 3
n01665541/n01665541_5468.JPEG 3
n01665541/n01665541_5478.JPEG 3
n01665541/n01665541_5487.JPEG 3
n01665541/n01665541_5500.JPEG 3
n01665541/n01665541_5503.JPEG 3
n01665541/n01665541_5505.JPEG 3
n01665541/n01665541_5521.JPEG 3
n01665541/n01665541_5541.JPEG 3
n01665541/n01665541_5563.JPEG 3
n01665541/n01665541_5572.JPEG 3
n01665541/n01665541_5602.JPEG 3
n01665541/n01665541_5605.JPEG 3
n01665541/n01665541_5610.JPEG 3
n01665541/n01665541_5611.JPEG 3
n01665541/n01665541_5613.JPEG 3
n01665541/n01665541_5615.JPEG 3
n01665541/n01665541_5635.JPEG 3
n01665541/n01665541_5642.JPEG 3
n01665541/n01665541_5696.JPEG 3
n01665541/n01665541_5718.JPEG 3
n01665541/n01665541_5731.JPEG 3
n01665541/n01665541_5732.JPEG 3
n01665541/n01665541_5745.JPEG 3
n01665541/n01665541_5747.JPEG 3
n01665541/n01665541_5768.JPEG 3
n01665541/n01665541_5781.JPEG 3
n01665541/n01665541_5784.JPEG 3
n01665541/n01665541_5791.JPEG 3
n01665541/n01665541_5792.JPEG 3
n01665541/n01665541_5808.JPEG 3
n01665541/n01665541_5809.JPEG 3
n01665541/n01665541_5817.JPEG 3
n01665541/n01665541_5829.JPEG 3
n01665541/n01665541_5834.JPEG 3
n01665541/n01665541_5845.JPEG 3
n01665541/n01665541_5855.JPEG 3
n01665541/n01665541_5889.JPEG 3
n01665541/n01665541_5928.JPEG 3
n01665541/n01665541_5964.JPEG 3
n01665541/n01665541_5972.JPEG 3
n01665541/n01665541_5979.JPEG 3
n01665541/n01665541_6000.JPEG 3
n01665541/n01665541_6021.JPEG 3
n01665541/n01665541_6047.JPEG 3
n01665541/n01665541_6056.JPEG 3
n01665541/n01665541_6073.JPEG 3
n01665541/n01665541_6082.JPEG 3
n01665541/n01665541_6084.JPEG 3
n01665541/n01665541_6125.JPEG 3
n01665541/n01665541_6126.JPEG 3
n01665541/n01665541_6157.JPEG 3
n01665541/n01665541_6169.JPEG 3
n01665541/n01665541_6178.JPEG 3
n01665541/n01665541_6186.JPEG 3
n01665541/n01665541_6199.JPEG 3
n01665541/n01665541_6225.JPEG 3
n01665541/n01665541_6227.JPEG 3
n01665541/n01665541_6241.JPEG 3
n01665541/n01665541_6281.JPEG 3
n01665541/n01665541_629.JPEG 3
n01665541/n01665541_6301.JPEG 3
n01665541/n01665541_6317.JPEG 3
n01665541/n01665541_6321.JPEG 3
n01665541/n01665541_6324.JPEG 3
n01665541/n01665541_6358.JPEG 3
n01665541/n01665541_6361.JPEG 3
n01665541/n01665541_6389.JPEG 3
n01665541/n01665541_6391.JPEG 3
n01665541/n01665541_6392.JPEG 3
n01665541/n01665541_6396.JPEG 3
n01665541/n01665541_6404.JPEG 3
n01665541/n01665541_6409.JPEG 3
n01665541/n01665541_6428.JPEG 3
n01665541/n01665541_644.JPEG 3
n01665541/n01665541_6441.JPEG 3
n01665541/n01665541_6443.JPEG 3
n01665541/n01665541_6449.JPEG 3
n01665541/n01665541_647.JPEG 3
n01665541/n01665541_6493.JPEG 3
n01665541/n01665541_6516.JPEG 3
n01665541/n01665541_6561.JPEG 3
n01665541/n01665541_659.JPEG 3
n01665541/n01665541_6624.JPEG 3
n01665541/n01665541_6649.JPEG 3
n01665541/n01665541_6666.JPEG 3
n01665541/n01665541_6696.JPEG 3
n01665541/n01665541_6723.JPEG 3
n01665541/n01665541_6734.JPEG 3
n01665541/n01665541_6752.JPEG 3
n01665541/n01665541_6760.JPEG 3
n01665541/n01665541_6791.JPEG 3
n01665541/n01665541_6794.JPEG 3
n01665541/n01665541_6799.JPEG 3
n01665541/n01665541_681.JPEG 3
n01665541/n01665541_6826.JPEG 3
n01665541/n01665541_6841.JPEG 3
n01665541/n01665541_6850.JPEG 3
n01665541/n01665541_691.JPEG 3
n01665541/n01665541_6923.JPEG 3
n01665541/n01665541_6950.JPEG 3
n01665541/n01665541_696.JPEG 3
n01665541/n01665541_6986.JPEG 3
n01665541/n01665541_7001.JPEG 3
n01665541/n01665541_7036.JPEG 3
n01665541/n01665541_7037.JPEG 3
n01665541/n01665541_7048.JPEG 3
n01665541/n01665541_706.JPEG 3
n01665541/n01665541_7074.JPEG 3
n01665541/n01665541_708.JPEG 3
n01665541/n01665541_7080.JPEG 3
n01665541/n01665541_7090.JPEG 3
n01665541/n01665541_7095.JPEG 3
n01665541/n01665541_7115.JPEG 3
n01665541/n01665541_713.JPEG 3
n01665541/n01665541_7248.JPEG 3
n01665541/n01665541_7264.JPEG 3
n01665541/n01665541_7269.JPEG 3
n01665541/n01665541_7274.JPEG 3
n01665541/n01665541_7279.JPEG 3
n01665541/n01665541_7307.JPEG 3
n01665541/n01665541_7401.JPEG 3
n01665541/n01665541_7532.JPEG 3
n01665541/n01665541_7543.JPEG 3
n01665541/n01665541_7549.JPEG 3
n01665541/n01665541_7551.JPEG 3
n01665541/n01665541_7573.JPEG 3
n01665541/n01665541_7583.JPEG 3
n01665541/n01665541_7591.JPEG 3
n01665541/n01665541_7596.JPEG 3
n01665541/n01665541_7612.JPEG 3
n01665541/n01665541_7629.JPEG 3
n01665541/n01665541_7638.JPEG 3
n01665541/n01665541_7658.JPEG 3
n01665541/n01665541_7670.JPEG 3
n01665541/n01665541_7736.JPEG 3
n01665541/n01665541_7760.JPEG 3
n01665541/n01665541_7767.JPEG 3
n01665541/n01665541_7776.JPEG 3
n01665541/n01665541_779.JPEG 3
n01665541/n01665541_7799.JPEG 3
n01665541/n01665541_7857.JPEG 3
n01665541/n01665541_7869.JPEG 3
n01665541/n01665541_790.JPEG 3
n01665541/n01665541_7920.JPEG 3
n01665541/n01665541_7935.JPEG 3
n01665541/n01665541_7946.JPEG 3
n01665541/n01665541_7974.JPEG 3
n01665541/n01665541_8010.JPEG 3
n01665541/n01665541_8028.JPEG 3
n01665541/n01665541_8076.JPEG 3
n01665541/n01665541_8081.JPEG 3
n01665541/n01665541_8087.JPEG 3
n01665541/n01665541_8113.JPEG 3
n01665541/n01665541_8128.JPEG 3
n01665541/n01665541_8153.JPEG 3
n01665541/n01665541_8154.JPEG 3
n01665541/n01665541_8160.JPEG 3
n01665541/n01665541_8163.JPEG 3
n01665541/n01665541_8185.JPEG 3
n01665541/n01665541_8209.JPEG 3
n01665541/n01665541_8227.JPEG 3
n01665541/n01665541_8286.JPEG 3
n01665541/n01665541_8297.JPEG 3
n01665541/n01665541_8319.JPEG 3
n01665541/n01665541_8336.JPEG 3
n01665541/n01665541_8343.JPEG 3
n01665541/n01665541_8344.JPEG 3
n01665541/n01665541_8359.JPEG 3
n01665541/n01665541_8399.JPEG 3
n01665541/n01665541_8401.JPEG 3
n01665541/n01665541_8407.JPEG 3
n01665541/n01665541_8415.JPEG 3
n01665541/n01665541_8429.JPEG 3
n01665541/n01665541_8432.JPEG 3
n01665541/n01665541_8466.JPEG 3
n01665541/n01665541_8478.JPEG 3
n01665541/n01665541_8496.JPEG 3
n01665541/n01665541_8508.JPEG 3
n01665541/n01665541_8510.JPEG 3
n01665541/n01665541_8527.JPEG 3
n01665541/n01665541_8533.JPEG 3
n01665541/n01665541_8567.JPEG 3
n01665541/n01665541_858.JPEG 3
n01665541/n01665541_8588.JPEG 3
n01665541/n01665541_8603.JPEG 3
n01665541/n01665541_8606.JPEG 3
n01665541/n01665541_8610.JPEG 3
n01665541/n01665541_8636.JPEG 3
n01665541/n01665541_864.JPEG 3
n01665541/n01665541_8691.JPEG 3
n01665541/n01665541_8692.JPEG 3
n01665541/n01665541_8694.JPEG 3
n01665541/n01665541_8697.JPEG 3
n01665541/n01665541_8720.JPEG 3
n01665541/n01665541_8741.JPEG 3
n01665541/n01665541_8810.JPEG 3
n01665541/n01665541_8862.JPEG 3
n01665541/n01665541_89.JPEG 3
n01665541/n01665541_8910.JPEG 3
n01665541/n01665541_8962.JPEG 3
n01665541/n01665541_897.JPEG 3
n01665541/n01665541_8970.JPEG 3
n01665541/n01665541_8980.JPEG 3
n01665541/n01665541_8989.JPEG 3
n01665541/n01665541_9031.JPEG 3
n01665541/n01665541_9033.JPEG 3
n01665541/n01665541_9242.JPEG 3
n01665541/n01665541_9244.JPEG 3
n01665541/n01665541_9249.JPEG 3
n01665541/n01665541_9259.JPEG 3
n01665541/n01665541_9315.JPEG 3
n01665541/n01665541_9325.JPEG 3
n01665541/n01665541_9346.JPEG 3
n01665541/n01665541_9352.JPEG 3
n01665541/n01665541_945.JPEG 3
n01665541/n01665541_9475.JPEG 3
n01665541/n01665541_9482.JPEG 3
n01665541/n01665541_9485.JPEG 3
n01665541/n01665541_9496.JPEG 3
n01665541/n01665541_9509.JPEG 3
n01665541/n01665541_951.JPEG 3
n01665541/n01665541_9519.JPEG 3
n01665541/n01665541_9554.JPEG 3
n01665541/n01665541_9580.JPEG 3
n01665541/n01665541_9594.JPEG 3
n01665541/n01665541_96.JPEG 3
n01665541/n01665541_960.JPEG 3
n01665541/n01665541_9619.JPEG 3
n01665541/n01665541_9632.JPEG 3
n01665541/n01665541_9637.JPEG 3
n01665541/n01665541_9639.JPEG 3
n01665541/n01665541_9645.JPEG 3
n01665541/n01665541_9650.JPEG 3
n01665541/n01665541_9652.JPEG 3
n01665541/n01665541_9656.JPEG 3
n01665541/n01665541_9681.JPEG 3
n01665541/n01665541_9686.JPEG 3
n01665541/n01665541_9726.JPEG 3
n01665541/n01665541_9743.JPEG 3
n01665541/n01665541_9745.JPEG 3
n01665541/n01665541_9761.JPEG 3
n01665541/n01665541_9773.JPEG 3
n01665541/n01665541_9797.JPEG 3
n01665541/n01665541_9811.JPEG 3
n01665541/n01665541_9815.JPEG 3
n01665541/n01665541_9845.JPEG 3
n01665541/n01665541_9860.JPEG 3
n01665541/n01665541_9874.JPEG 3
n01665541/n01665541_9898.JPEG 3
n01665541/n01665541_9923.JPEG 3
n01665541/n01665541_9924.JPEG 3
n01665541/n01665541_9940.JPEG 3
n01665541/n01665541_9961.JPEG 3
n01665541/n01665541_9967.JPEG 3
n01665541/n01665541_9992.JPEG 3
n01667114/n01667114_10006.JPEG 3
n01667114/n01667114_1001.JPEG 3
n01667114/n01667114_10017.JPEG 3
n01667114/n01667114_1002.JPEG 3
n01667114/n01667114_10029.JPEG 3
n01667114/n01667114_1003.JPEG 3
n01667114/n01667114_10043.JPEG 3
n01667114/n01667114_10044.JPEG 3
n01667114/n01667114_10056.JPEG 3
n01667114/n01667114_10062.JPEG 3
n01667114/n01667114_10063.JPEG 3
n01667114/n01667114_10066.JPEG 3
n01667114/n01667114_10070.JPEG 3
n01667114/n01667114_10084.JPEG 3
n01667114/n01667114_1010.JPEG 3
n01667114/n01667114_1012.JPEG 3
n01667114/n01667114_10133.JPEG 3
n01667114/n01667114_10145.JPEG 3
n01667114/n01667114_10155.JPEG 3
n01667114/n01667114_10156.JPEG 3
n01667114/n01667114_1020.JPEG 3
n01667114/n01667114_10219.JPEG 3
n01667114/n01667114_10223.JPEG 3
n01667114/n01667114_10241.JPEG 3
n01667114/n01667114_10245.JPEG 3
n01667114/n01667114_10261.JPEG 3
n01667114/n01667114_1027.JPEG 3
n01667114/n01667114_10273.JPEG 3
n01667114/n01667114_10294.JPEG 3
n01667114/n01667114_10309.JPEG 3
n01667114/n01667114_10312.JPEG 3
n01667114/n01667114_10337.JPEG 3
n01667114/n01667114_10354.JPEG 3
n01667114/n01667114_1037.JPEG 3
n01667114/n01667114_10382.JPEG 3
n01667114/n01667114_10389.JPEG 3
n01667114/n01667114_10413.JPEG 3
n01667114/n01667114_10448.JPEG 3
n01667114/n01667114_10468.JPEG 3
n01667114/n01667114_10474.JPEG 3
n01667114/n01667114_10477.JPEG 3
n01667114/n01667114_10486.JPEG 3
n01667114/n01667114_10487.JPEG 3
n01667114/n01667114_1050.JPEG 3
n01667114/n01667114_10504.JPEG 3
n01667114/n01667114_10509.JPEG 3
n01667114/n01667114_10518.JPEG 3
n01667114/n01667114_10520.JPEG 3
n01667114/n01667114_10547.JPEG 3
n01667114/n01667114_10553.JPEG 3
n01667114/n01667114_10571.JPEG 3
n01667114/n01667114_106.JPEG 3
n01667114/n01667114_10604.JPEG 3
n01667114/n01667114_10607.JPEG 3
n01667114/n01667114_10619.JPEG 3
n01667114/n01667114_1065.JPEG 3
n01667114/n01667114_10673.JPEG 3
n01667114/n01667114_10681.JPEG 3
n01667114/n01667114_10706.JPEG 3
n01667114/n01667114_10713.JPEG 3
n01667114/n01667114_10726.JPEG 3
n01667114/n01667114_10732.JPEG 3
n01667114/n01667114_10749.JPEG 3
n01667114/n01667114_10750.JPEG 3
n01667114/n01667114_10756.JPEG 3
n01667114/n01667114_10776.JPEG 3
n01667114/n01667114_1079.JPEG 3
n01667114/n01667114_10821.JPEG 3
n01667114/n01667114_10828.JPEG 3
n01667114/n01667114_10857.JPEG 3
n01667114/n01667114_1086.JPEG 3
n01667114/n01667114_10878.JPEG 3
n01667114/n01667114_10886.JPEG 3
n01667114/n01667114_1089.JPEG 3
n01667114/n01667114_10896.JPEG 3
n01667114/n01667114_1090.JPEG 3
n01667114/n01667114_10905.JPEG 3
n01667114/n01667114_10909.JPEG 3
n01667114/n01667114_1093.JPEG 3
n01667114/n01667114_10933.JPEG 3
n01667114/n01667114_1094.JPEG 3
n01667114/n01667114_10940.JPEG 3
n01667114/n01667114_10953.JPEG 3
n01667114/n01667114_10995.JPEG 3
n01667114/n01667114_11000.JPEG 3
n01667114/n01667114_11018.JPEG 3
n01667114/n01667114_11035.JPEG 3
n01667114/n01667114_11048.JPEG 3
n01667114/n01667114_11052.JPEG 3
n01667114/n01667114_11066.JPEG 3
n01667114/n01667114_11067.JPEG 3
n01667114/n01667114_11080.JPEG 3
n01667114/n01667114_11086.JPEG 3
n01667114/n01667114_11110.JPEG 3
n01667114/n01667114_11134.JPEG 3
n01667114/n01667114_11160.JPEG 3
n01667114/n01667114_11164.JPEG 3
n01667114/n01667114_112.JPEG 3
n01667114/n01667114_1120.JPEG 3
n01667114/n01667114_11227.JPEG 3
n01667114/n01667114_1123.JPEG 3
n01667114/n01667114_11236.JPEG 3
n01667114/n01667114_11243.JPEG 3
n01667114/n01667114_1125.JPEG 3
n01667114/n01667114_1127.JPEG 3
n01667114/n01667114_11317.JPEG 3
n01667114/n01667114_1132.JPEG 3
n01667114/n01667114_11333.JPEG 3
n01667114/n01667114_1134.JPEG 3
n01667114/n01667114_11387.JPEG 3
n01667114/n01667114_11398.JPEG 3
n01667114/n01667114_1141.JPEG 3
n01667114/n01667114_11422.JPEG 3
n01667114/n01667114_1143.JPEG 3
n01667114/n01667114_11449.JPEG 3
n01667114/n01667114_11454.JPEG 3
n01667114/n01667114_1146.JPEG 3
n01667114/n01667114_115.JPEG 3
n01667114/n01667114_11508.JPEG 3
n01667114/n01667114_11523.JPEG 3
n01667114/n01667114_11537.JPEG 3
n01667114/n01667114_1154.JPEG 3
n01667114/n01667114_11543.JPEG 3
n01667114/n01667114_11565.JPEG 3
n01667114/n01667114_11591.JPEG 3
n01667114/n01667114_11592.JPEG 3
n01667114/n01667114_11596.JPEG 3
n01667114/n01667114_11608.JPEG 3
n01667114/n01667114_11611.JPEG 3
n01667114/n01667114_1162.JPEG 3
n01667114/n01667114_11633.JPEG 3
n01667114/n01667114_11639.JPEG 3
n01667114/n01667114_11644.JPEG 3
n01667114/n01667114_11649.JPEG 3
n01667114/n01667114_1169.JPEG 3
n01667114/n01667114_11690.JPEG 3
n01667114/n01667114_11698.JPEG 3
n01667114/n01667114_11707.JPEG 3
n01667114/n01667114_11716.JPEG 3
n01667114/n01667114_11717.JPEG 3
n01667114/n01667114_1172.JPEG 3
n01667114/n01667114_11721.JPEG 3
n01667114/n01667114_11727.JPEG 3
n01667114/n01667114_11741.JPEG 3
n01667114/n01667114_11746.JPEG 3
n01667114/n01667114_1176.JPEG 3
n01667114/n01667114_11766.JPEG 3
n01667114/n01667114_11778.JPEG 3
n01667114/n01667114_11779.JPEG 3
n01667114/n01667114_118.JPEG 3
n01667114/n01667114_11812.JPEG 3
n01667114/n01667114_1182.JPEG 3
n01667114/n01667114_11825.JPEG 3
n01667114/n01667114_11840.JPEG 3
n01667114/n01667114_1185.JPEG 3
n01667114/n01667114_11859.JPEG 3
n01667114/n01667114_11864.JPEG 3
n01667114/n01667114_11868.JPEG 3
n01667114/n01667114_11893.JPEG 3
n01667114/n01667114_11894.JPEG 3
n01667114/n01667114_11896.JPEG 3
n01667114/n01667114_119.JPEG 3
n01667114/n01667114_11913.JPEG 3
n01667114/n01667114_1192.JPEG 3
n01667114/n01667114_11924.JPEG 3
n01667114/n01667114_11925.JPEG 3
n01667114/n01667114_1193.JPEG 3
n01667114/n01667114_11965.JPEG 3
n01667114/n01667114_12004.JPEG 3
n01667114/n01667114_12005.JPEG 3
n01667114/n01667114_12009.JPEG 3
n01667114/n01667114_12011.JPEG 3
n01667114/n01667114_12019.JPEG 3
n01667114/n01667114_12026.JPEG 3
n01667114/n01667114_12031.JPEG 3
n01667114/n01667114_12032.JPEG 3
n01667114/n01667114_1204.JPEG 3
n01667114/n01667114_12043.JPEG 3
n01667114/n01667114_1205.JPEG 3
n01667114/n01667114_12061.JPEG 3
n01667114/n01667114_12069.JPEG 3
n01667114/n01667114_1207.JPEG 3
n01667114/n01667114_12083.JPEG 3
n01667114/n01667114_12102.JPEG 3
n01667114/n01667114_12136.JPEG 3
n01667114/n01667114_12146.JPEG 3
n01667114/n01667114_12158.JPEG 3
n01667114/n01667114_12161.JPEG 3
n01667114/n01667114_1218.JPEG 3
n01667114/n01667114_12180.JPEG 3
n01667114/n01667114_12192.JPEG 3
n01667114/n01667114_12194.JPEG 3
n01667114/n01667114_12208.JPEG 3
n01667114/n01667114_1221.JPEG 3
n01667114/n01667114_12219.JPEG 3
n01667114/n01667114_12227.JPEG 3
n01667114/n01667114_12233.JPEG 3
n01667114/n01667114_1224.JPEG 3
n01667114/n01667114_12264.JPEG 3
n01667114/n01667114_12296.JPEG 3
n01667114/n01667114_12304.JPEG 3
n01667114/n01667114_12312.JPEG 3
n01667114/n01667114_12332.JPEG 3
n01667114/n01667114_1236.JPEG 3
n01667114/n01667114_12361.JPEG 3
n01667114/n01667114_12372.JPEG 3
n01667114/n01667114_12373.JPEG 3
n01667114/n01667114_12375.JPEG 3
n01667114/n01667114_12401.JPEG 3
n01667114/n01667114_12413.JPEG 3
n01667114/n01667114_12437.JPEG 3
n01667114/n01667114_1246.JPEG 3
n01667114/n01667114_12470.JPEG 3
n01667114/n01667114_12482.JPEG 3
n01667114/n01667114_12493.JPEG 3
n01667114/n01667114_12504.JPEG 3
n01667114/n01667114_12508.JPEG 3
n01667114/n01667114_12509.JPEG 3
n01667114/n01667114_12531.JPEG 3
n01667114/n01667114_12537.JPEG 3
n01667114/n01667114_12539.JPEG 3
n01667114/n01667114_12560.JPEG 3
n01667114/n01667114_12598.JPEG 3
n01667114/n01667114_12680.JPEG 3
n01667114/n01667114_12684.JPEG 3
n01667114/n01667114_127.JPEG 3
n01667114/n01667114_1270.JPEG 3
n01667114/n01667114_1275.JPEG 3
n01667114/n01667114_12767.JPEG 3
n01667114/n01667114_12771.JPEG 3
n01667114/n01667114_1283.JPEG 3
n01667114/n01667114_1284.JPEG 3
n01667114/n01667114_12856.JPEG 3
n01667114/n01667114_1288.JPEG 3
n01667114/n01667114_1290.JPEG 3
n01667114/n01667114_12910.JPEG 3
n01667114/n01667114_12915.JPEG 3
n01667114/n01667114_12924.JPEG 3
n01667114/n01667114_12930.JPEG 3
n01667114/n01667114_1296.JPEG 3
n01667114/n01667114_12964.JPEG 3
n01667114/n01667114_12965.JPEG 3
n01667114/n01667114_12992.JPEG 3
n01667114/n01667114_12993.JPEG 3
n01667114/n01667114_13001.JPEG 3
n01667114/n01667114_13067.JPEG 3
n01667114/n01667114_13203.JPEG 3
n01667114/n01667114_13211.JPEG 3
n01667114/n01667114_13230.JPEG 3
n01667114/n01667114_13231.JPEG 3
n01667114/n01667114_13237.JPEG 3
n01667114/n01667114_13245.JPEG 3
n01667114/n01667114_1325.JPEG 3
n01667114/n01667114_13263.JPEG 3
n01667114/n01667114_1329.JPEG 3
n01667114/n01667114_13320.JPEG 3
n01667114/n01667114_13339.JPEG 3
n01667114/n01667114_13344.JPEG 3
n01667114/n01667114_13345.JPEG 3
n01667114/n01667114_1335.JPEG 3
n01667114/n01667114_13354.JPEG 3
n01667114/n01667114_13355.JPEG 3
n01667114/n01667114_13357.JPEG 3
n01667114/n01667114_1336.JPEG 3
n01667114/n01667114_13385.JPEG 3
n01667114/n01667114_13389.JPEG 3
n01667114/n01667114_13393.JPEG 3
n01667114/n01667114_1341.JPEG 3
n01667114/n01667114_13453.JPEG 3
n01667114/n01667114_13454.JPEG 3
n01667114/n01667114_13498.JPEG 3
n01667114/n01667114_13507.JPEG 3
n01667114/n01667114_13513.JPEG 3
n01667114/n01667114_13514.JPEG 3
n01667114/n01667114_13524.JPEG 3
n01667114/n01667114_13569.JPEG 3
n01667114/n01667114_13593.JPEG 3
n01667114/n01667114_13604.JPEG 3
n01667114/n01667114_13622.JPEG 3
n01667114/n01667114_13651.JPEG 3
n01667114/n01667114_1366.JPEG 3
n01667114/n01667114_13661.JPEG 3
n01667114/n01667114_13676.JPEG 3
n01667114/n01667114_13720.JPEG 3
n01667114/n01667114_13744.JPEG 3
n01667114/n01667114_1378.JPEG 3
n01667114/n01667114_1379.JPEG 3
n01667114/n01667114_13811.JPEG 3
n01667114/n01667114_13820.JPEG 3
n01667114/n01667114_13834.JPEG 3
n01667114/n01667114_1385.JPEG 3
n01667114/n01667114_13875.JPEG 3
n01667114/n01667114_13877.JPEG 3
n01667114/n01667114_13879.JPEG 3
n01667114/n01667114_13893.JPEG 3
n01667114/n01667114_1392.JPEG 3
n01667114/n01667114_13924.JPEG 3
n01667114/n01667114_13936.JPEG 3
n01667114/n01667114_13941.JPEG 3
n01667114/n01667114_1395.JPEG 3
n01667114/n01667114_13966.JPEG 3
n01667114/n01667114_13978.JPEG 3
n01667114/n01667114_1398.JPEG 3
n01667114/n01667114_140.JPEG 3
n01667114/n01667114_1400.JPEG 3
n01667114/n01667114_14003.JPEG 3
n01667114/n01667114_1403.JPEG 3
n01667114/n01667114_14032.JPEG 3
n01667114/n01667114_14044.JPEG 3
n01667114/n01667114_14046.JPEG 3
n01667114/n01667114_14059.JPEG 3
n01667114/n01667114_14069.JPEG 3
n01667114/n01667114_14079.JPEG 3
n01667114/n01667114_14120.JPEG 3
n01667114/n01667114_14143.JPEG 3
n01667114/n01667114_14147.JPEG 3
n01667114/n01667114_14165.JPEG 3
n01667114/n01667114_14175.JPEG 3
n01667114/n01667114_14184.JPEG 3
n01667114/n01667114_1424.JPEG 3
n01667114/n01667114_14241.JPEG 3
n01667114/n01667114_14250.JPEG 3
n01667114/n01667114_14266.JPEG 3
n01667114/n01667114_14287.JPEG 3
n01667114/n01667114_14316.JPEG 3
n01667114/n01667114_1432.JPEG 3
n01667114/n01667114_14331.JPEG 3
n01667114/n01667114_14333.JPEG 3
n01667114/n01667114_14343.JPEG 3
n01667114/n01667114_14374.JPEG 3
n01667114/n01667114_1438.JPEG 3
n01667114/n01667114_14385.JPEG 3
n01667114/n01667114_14389.JPEG 3
n01667114/n01667114_14440.JPEG 3
n01667114/n01667114_14458.JPEG 3
n01667114/n01667114_14465.JPEG 3
n01667114/n01667114_14496.JPEG 3
n01667114/n01667114_14525.JPEG 3
n01667114/n01667114_14530.JPEG 3
n01667114/n01667114_14534.JPEG 3
n01667114/n01667114_14541.JPEG 3
n01667114/n01667114_14542.JPEG 3
n01667114/n01667114_14569.JPEG 3
n01667114/n01667114_14574.JPEG 3
n01667114/n01667114_14580.JPEG 3
n01667114/n01667114_1459.JPEG 3
n01667114/n01667114_1460.JPEG 3
n01667114/n01667114_14636.JPEG 3
n01667114/n01667114_14640.JPEG 3
n01667114/n01667114_14655.JPEG 3
n01667114/n01667114_14669.JPEG 3
n01667114/n01667114_14683.JPEG 3
n01667114/n01667114_14689.JPEG 3
n01667114/n01667114_14709.JPEG 3
n01667114/n01667114_14780.JPEG 3
n01667114/n01667114_14785.JPEG 3
n01667114/n01667114_1479.JPEG 3
n01667114/n01667114_14810.JPEG 3
n01667114/n01667114_1486.JPEG 3
n01667114/n01667114_14883.JPEG 3
n01667114/n01667114_14889.JPEG 3
n01667114/n01667114_149.JPEG 3
n01667114/n01667114_14909.JPEG 3
n01667114/n01667114_14938.JPEG 3
n01667114/n01667114_14942.JPEG 3
n01667114/n01667114_14947.JPEG 3
n01667114/n01667114_14954.JPEG 3
n01667114/n01667114_15000.JPEG 3
n01667114/n01667114_15018.JPEG 3
n01667114/n01667114_15039.JPEG 3
n01667114/n01667114_15059.JPEG 3
n01667114/n01667114_1511.JPEG 3
n01667114/n01667114_1515.JPEG 3
n01667114/n01667114_15169.JPEG 3
n01667114/n01667114_15172.JPEG 3
n01667114/n01667114_1519.JPEG 3
n01667114/n01667114_1521.JPEG 3
n01667114/n01667114_15214.JPEG 3
n01667114/n01667114_15216.JPEG 3
n01667114/n01667114_1531.JPEG 3
n01667114/n01667114_15327.JPEG 3
n01667114/n01667114_1535.JPEG 3
n01667114/n01667114_15404.JPEG 3
n01667114/n01667114_15417.JPEG 3
n01667114/n01667114_15419.JPEG 3
n01667114/n01667114_1542.JPEG 3
n01667114/n01667114_15422.JPEG 3
n01667114/n01667114_1546.JPEG 3
n01667114/n01667114_15461.JPEG 3
n01667114/n01667114_15465.JPEG 3
n01667114/n01667114_15484.JPEG 3
n01667114/n01667114_1550.JPEG 3
n01667114/n01667114_15501.JPEG 3
n01667114/n01667114_15502.JPEG 3
n01667114/n01667114_15503.JPEG 3
n01667114/n01667114_1553.JPEG 3
n01667114/n01667114_15568.JPEG 3
n01667114/n01667114_1557.JPEG 3
n01667114/n01667114_1559.JPEG 3
n01667114/n01667114_15637.JPEG 3
n01667114/n01667114_15733.JPEG 3
n01667114/n01667114_1575.JPEG 3
n01667114/n01667114_15758.JPEG 3
n01667114/n01667114_1577.JPEG 3
n01667114/n01667114_15801.JPEG 3
n01667114/n01667114_1584.JPEG 3
n01667114/n01667114_15884.JPEG 3
n01667114/n01667114_15887.JPEG 3
n01667114/n01667114_1590.JPEG 3
n01667114/n01667114_1592.JPEG 3
n01667114/n01667114_1595.JPEG 3
n01667114/n01667114_15950.JPEG 3
n01667114/n01667114_15966.JPEG 3
n01667114/n01667114_1598.JPEG 3
n01667114/n01667114_16.JPEG 3
n01667114/n01667114_16043.JPEG 3
n01667114/n01667114_16048.JPEG 3
n01667114/n01667114_16059.JPEG 3
n01667114/n01667114_161.JPEG 3
n01667114/n01667114_16100.JPEG 3
n01667114/n01667114_1612.JPEG 3
n01667114/n01667114_16171.JPEG 3
n01667114/n01667114_16185.JPEG 3
n01667114/n01667114_16198.JPEG 3
n01667114/n01667114_1620.JPEG 3
n01667114/n01667114_1634.JPEG 3
n01667114/n01667114_16346.JPEG 3
n01667114/n01667114_16384.JPEG 3
n01667114/n01667114_164.JPEG 3
n01667114/n01667114_16401.JPEG 3
n01667114/n01667114_16461.JPEG 3
n01667114/n01667114_16471.JPEG 3
n01667114/n01667114_16473.JPEG 3
n01667114/n01667114_16491.JPEG 3
n01667114/n01667114_16516.JPEG 3
n01667114/n01667114_16519.JPEG 3
n01667114/n01667114_16534.JPEG 3
n01667114/n01667114_16537.JPEG 3
n01667114/n01667114_1654.JPEG 3
n01667114/n01667114_16545.JPEG 3
n01667114/n01667114_16551.JPEG 3
n01667114/n01667114_16566.JPEG 3
n01667114/n01667114_16572.JPEG 3
n01667114/n01667114_16584.JPEG 3
n01667114/n01667114_16609.JPEG 3
n01667114/n01667114_16627.JPEG 3
n01667114/n01667114_1664.JPEG 3
n01667114/n01667114_16682.JPEG 3
n01667114/n01667114_1671.JPEG 3
n01667114/n01667114_16749.JPEG 3
n01667114/n01667114_16757.JPEG 3
n01667114/n01667114_16771.JPEG 3
n01667114/n01667114_1678.JPEG 3
n01667114/n01667114_16787.JPEG 3
n01667114/n01667114_1679.JPEG 3
n01667114/n01667114_16804.JPEG 3
n01667114/n01667114_16827.JPEG 3
n01667114/n01667114_16828.JPEG 3
n01667114/n01667114_16893.JPEG 3
n01667114/n01667114_16904.JPEG 3
n01667114/n01667114_16914.JPEG 3
n01667114/n01667114_16953.JPEG 3
n01667114/n01667114_1696.JPEG 3
n01667114/n01667114_17000.JPEG 3
n01667114/n01667114_17022.JPEG 3
n01667114/n01667114_1711.JPEG 3
n01667114/n01667114_17113.JPEG 3
n01667114/n01667114_17118.JPEG 3
n01667114/n01667114_17125.JPEG 3
n01667114/n01667114_1714.JPEG 3
n01667114/n01667114_17143.JPEG 3
n01667114/n01667114_17144.JPEG 3
n01667114/n01667114_17177.JPEG 3
n01667114/n01667114_17193.JPEG 3
n01667114/n01667114_1720.JPEG 3
n01667114/n01667114_17207.JPEG 3
n01667114/n01667114_17248.JPEG 3
n01667114/n01667114_17254.JPEG 3
n01667114/n01667114_17279.JPEG 3
n01667114/n01667114_17302.JPEG 3
n01667114/n01667114_17310.JPEG 3
n01667114/n01667114_17335.JPEG 3
n01667114/n01667114_17340.JPEG 3
n01667114/n01667114_17351.JPEG 3
n01667114/n01667114_17359.JPEG 3
n01667114/n01667114_17361.JPEG 3
n01667114/n01667114_1738.JPEG 3
n01667114/n01667114_17389.JPEG 3
n01667114/n01667114_1740.JPEG 3
n01667114/n01667114_1743.JPEG 3
n01667114/n01667114_17436.JPEG 3
n01667114/n01667114_17447.JPEG 3
n01667114/n01667114_1746.JPEG 3
n01667114/n01667114_17463.JPEG 3
n01667114/n01667114_17468.JPEG 3
n01667114/n01667114_17476.JPEG 3
n01667114/n01667114_1748.JPEG 3
n01667114/n01667114_17486.JPEG 3
n01667114/n01667114_17491.JPEG 3
n01667114/n01667114_175.JPEG 3
n01667114/n01667114_17544.JPEG 3
n01667114/n01667114_17557.JPEG 3
n01667114/n01667114_17564.JPEG 3
n01667114/n01667114_17586.JPEG 3
n01667114/n01667114_176.JPEG 3
n01667114/n01667114_17617.JPEG 3
n01667114/n01667114_1763.JPEG 3
n01667114/n01667114_1765.JPEG 3
n01667114/n01667114_1769.JPEG 3
n01667114/n01667114_17694.JPEG 3
n01667114/n01667114_1774.JPEG 3
n01667114/n01667114_1780.JPEG 3
n01667114/n01667114_1791.JPEG 3
n01667114/n01667114_1797.JPEG 3
n01667114/n01667114_1798.JPEG 3
n01667114/n01667114_1803.JPEG 3
n01667114/n01667114_1810.JPEG 3
n01667114/n01667114_1812.JPEG 3
n01667114/n01667114_1827.JPEG 3
n01667114/n01667114_1828.JPEG 3
n01667114/n01667114_183.JPEG 3
n01667114/n01667114_1842.JPEG 3
n01667114/n01667114_1843.JPEG 3
n01667114/n01667114_1850.JPEG 3
n01667114/n01667114_1852.JPEG 3
n01667114/n01667114_1870.JPEG 3
n01667114/n01667114_188.JPEG 3
n01667114/n01667114_1888.JPEG 3
n01667114/n01667114_1889.JPEG 3
n01667114/n01667114_1892.JPEG 3
n01667114/n01667114_1899.JPEG 3
n01667114/n01667114_1914.JPEG 3
n01667114/n01667114_1932.JPEG 3
n01667114/n01667114_1939.JPEG 3
n01667114/n01667114_1956.JPEG 3
n01667114/n01667114_1963.JPEG 3
n01667114/n01667114_1974.JPEG 3
n01667114/n01667114_198.JPEG 3
n01667114/n01667114_1985.JPEG 3
n01667114/n01667114_1986.JPEG 3
n01667114/n01667114_1988.JPEG 3
n01667114/n01667114_199.JPEG 3
n01667114/n01667114_1991.JPEG 3
n01667114/n01667114_1993.JPEG 3
n01667114/n01667114_1997.JPEG 3
n01667114/n01667114_200.JPEG 3
n01667114/n01667114_2004.JPEG 3
n01667114/n01667114_2016.JPEG 3
n01667114/n01667114_2020.JPEG 3
n01667114/n01667114_2022.JPEG 3
n01667114/n01667114_2048.JPEG 3
n01667114/n01667114_205.JPEG 3
n01667114/n01667114_2060.JPEG 3
n01667114/n01667114_2064.JPEG 3
n01667114/n01667114_207.JPEG 3
n01667114/n01667114_2073.JPEG 3
n01667114/n01667114_2077.JPEG 3
n01667114/n01667114_2079.JPEG 3
n01667114/n01667114_2097.JPEG 3
n01667114/n01667114_212.JPEG 3
n01667114/n01667114_2121.JPEG 3
n01667114/n01667114_2125.JPEG 3
n01667114/n01667114_2132.JPEG 3
n01667114/n01667114_214.JPEG 3
n01667114/n01667114_2140.JPEG 3
n01667114/n01667114_2152.JPEG 3
n01667114/n01667114_2182.JPEG 3
n01667114/n01667114_2193.JPEG 3
n01667114/n01667114_2198.JPEG 3
n01667114/n01667114_2202.JPEG 3
n01667114/n01667114_2220.JPEG 3
n01667114/n01667114_2246.JPEG 3
n01667114/n01667114_225.JPEG 3
n01667114/n01667114_2253.JPEG 3
n01667114/n01667114_2260.JPEG 3
n01667114/n01667114_228.JPEG 3
n01667114/n01667114_2286.JPEG 3
n01667114/n01667114_2287.JPEG 3
n01667114/n01667114_2296.JPEG 3
n01667114/n01667114_230.JPEG 3
n01667114/n01667114_2310.JPEG 3
n01667114/n01667114_2327.JPEG 3
n01667114/n01667114_2332.JPEG 3
n01667114/n01667114_2334.JPEG 3
n01667114/n01667114_2338.JPEG 3
n01667114/n01667114_234.JPEG 3
n01667114/n01667114_2340.JPEG 3
n01667114/n01667114_2368.JPEG 3
n01667114/n01667114_238.JPEG 3
n01667114/n01667114_2393.JPEG 3
n01667114/n01667114_24.JPEG 3
n01667114/n01667114_2403.JPEG 3
n01667114/n01667114_2410.JPEG 3
n01667114/n01667114_2413.JPEG 3
n01667114/n01667114_2418.JPEG 3
n01667114/n01667114_2419.JPEG 3
n01667114/n01667114_2423.JPEG 3
n01667114/n01667114_2433.JPEG 3
n01667114/n01667114_2454.JPEG 3
n01667114/n01667114_2460.JPEG 3
n01667114/n01667114_2467.JPEG 3
n01667114/n01667114_2472.JPEG 3
n01667114/n01667114_2475.JPEG 3
n01667114/n01667114_2493.JPEG 3
n01667114/n01667114_2508.JPEG 3
n01667114/n01667114_2521.JPEG 3
n01667114/n01667114_2525.JPEG 3
n01667114/n01667114_2527.JPEG 3
n01667114/n01667114_253.JPEG 3
n01667114/n01667114_2530.JPEG 3
n01667114/n01667114_2536.JPEG 3
n01667114/n01667114_2539.JPEG 3
n01667114/n01667114_2541.JPEG 3
n01667114/n01667114_2554.JPEG 3
n01667114/n01667114_2557.JPEG 3
n01667114/n01667114_2564.JPEG 3
n01667114/n01667114_2578.JPEG 3
n01667114/n01667114_2581.JPEG 3
n01667114/n01667114_2582.JPEG 3
n01667114/n01667114_2590.JPEG 3
n01667114/n01667114_2598.JPEG 3
n01667114/n01667114_2599.JPEG 3
n01667114/n01667114_2601.JPEG 3
n01667114/n01667114_2604.JPEG 3
n01667114/n01667114_2606.JPEG 3
n01667114/n01667114_2614.JPEG 3
n01667114/n01667114_2622.JPEG 3
n01667114/n01667114_2623.JPEG 3
n01667114/n01667114_2624.JPEG 3
n01667114/n01667114_2636.JPEG 3
n01667114/n01667114_2637.JPEG 3
n01667114/n01667114_2645.JPEG 3
n01667114/n01667114_265.JPEG 3
n01667114/n01667114_2656.JPEG 3
n01667114/n01667114_2660.JPEG 3
n01667114/n01667114_2662.JPEG 3
n01667114/n01667114_2669.JPEG 3
n01667114/n01667114_2682.JPEG 3
n01667114/n01667114_2688.JPEG 3
n01667114/n01667114_2689.JPEG 3
n01667114/n01667114_2695.JPEG 3
n01667114/n01667114_2699.JPEG 3
n01667114/n01667114_270.JPEG 3
n01667114/n01667114_2701.JPEG 3
n01667114/n01667114_2703.JPEG 3
n01667114/n01667114_2704.JPEG 3
n01667114/n01667114_2713.JPEG 3
n01667114/n01667114_2714.JPEG 3
n01667114/n01667114_2716.JPEG 3
n01667114/n01667114_2719.JPEG 3
n01667114/n01667114_2720.JPEG 3
n01667114/n01667114_2730.JPEG 3
n01667114/n01667114_2733.JPEG 3
n01667114/n01667114_274.JPEG 3
n01667114/n01667114_275.JPEG 3
n01667114/n01667114_2751.JPEG 3
n01667114/n01667114_2753.JPEG 3
n01667114/n01667114_2755.JPEG 3
n01667114/n01667114_2768.JPEG 3
n01667114/n01667114_277.JPEG 3
n01667114/n01667114_2785.JPEG 3
n01667114/n01667114_2792.JPEG 3
n01667114/n01667114_2795.JPEG 3
n01667114/n01667114_2800.JPEG 3
n01667114/n01667114_281.JPEG 3
n01667114/n01667114_2815.JPEG 3
n01667114/n01667114_2820.JPEG 3
n01667114/n01667114_2823.JPEG 3
n01667114/n01667114_2830.JPEG 3
n01667114/n01667114_2833.JPEG 3
n01667114/n01667114_2865.JPEG 3
n01667114/n01667114_2918.JPEG 3
n01667114/n01667114_2928.JPEG 3
n01667114/n01667114_293.JPEG 3
n01667114/n01667114_2931.JPEG 3
n01667114/n01667114_2944.JPEG 3
n01667114/n01667114_2949.JPEG 3
n01667114/n01667114_295.JPEG 3
n01667114/n01667114_2955.JPEG 3
n01667114/n01667114_2961.JPEG 3
n01667114/n01667114_2964.JPEG 3
n01667114/n01667114_2967.JPEG 3
n01667114/n01667114_2972.JPEG 3
n01667114/n01667114_2973.JPEG 3
n01667114/n01667114_2977.JPEG 3
n01667114/n01667114_299.JPEG 3
n01667114/n01667114_2995.JPEG 3
n01667114/n01667114_3005.JPEG 3
n01667114/n01667114_3009.JPEG 3
n01667114/n01667114_3010.JPEG 3
n01667114/n01667114_3013.JPEG 3
n01667114/n01667114_3014.JPEG 3
n01667114/n01667114_3017.JPEG 3
n01667114/n01667114_3018.JPEG 3
n01667114/n01667114_3027.JPEG 3
n01667114/n01667114_3031.JPEG 3
n01667114/n01667114_3035.JPEG 3
n01667114/n01667114_3041.JPEG 3
n01667114/n01667114_3045.JPEG 3
n01667114/n01667114_3049.JPEG 3
n01667114/n01667114_3061.JPEG 3
n01667114/n01667114_3063.JPEG 3
n01667114/n01667114_3065.JPEG 3
n01667114/n01667114_3073.JPEG 3
n01667114/n01667114_3075.JPEG 3
n01667114/n01667114_3080.JPEG 3
n01667114/n01667114_3081.JPEG 3
n01667114/n01667114_3093.JPEG 3
n01667114/n01667114_3106.JPEG 3
n01667114/n01667114_3108.JPEG 3
n01667114/n01667114_312.JPEG 3
n01667114/n01667114_3129.JPEG 3
n01667114/n01667114_3149.JPEG 3
n01667114/n01667114_3158.JPEG 3
n01667114/n01667114_3159.JPEG 3
n01667114/n01667114_3161.JPEG 3
n01667114/n01667114_3180.JPEG 3
n01667114/n01667114_3186.JPEG 3
n01667114/n01667114_3188.JPEG 3
n01667114/n01667114_3198.JPEG 3
n01667114/n01667114_32.JPEG 3
n01667114/n01667114_3203.JPEG 3
n01667114/n01667114_3204.JPEG 3
n01667114/n01667114_3221.JPEG 3
n01667114/n01667114_3224.JPEG 3
n01667114/n01667114_3239.JPEG 3
n01667114/n01667114_3244.JPEG 3
n01667114/n01667114_3247.JPEG 3
n01667114/n01667114_3260.JPEG 3
n01667114/n01667114_3264.JPEG 3
n01667114/n01667114_3284.JPEG 3
n01667114/n01667114_3285.JPEG 3
n01667114/n01667114_3294.JPEG 3
n01667114/n01667114_3298.JPEG 3
n01667114/n01667114_3299.JPEG 3
n01667114/n01667114_331.JPEG 3
n01667114/n01667114_3313.JPEG 3
n01667114/n01667114_3314.JPEG 3
n01667114/n01667114_3317.JPEG 3
n01667114/n01667114_3336.JPEG 3
n01667114/n01667114_3343.JPEG 3
n01667114/n01667114_3350.JPEG 3
n01667114/n01667114_3380.JPEG 3
n01667114/n01667114_339.JPEG 3
n01667114/n01667114_3398.JPEG 3
n01667114/n01667114_3401.JPEG 3
n01667114/n01667114_3413.JPEG 3
n01667114/n01667114_3423.JPEG 3
n01667114/n01667114_3424.JPEG 3
n01667114/n01667114_3439.JPEG 3
n01667114/n01667114_3440.JPEG 3
n01667114/n01667114_3458.JPEG 3
n01667114/n01667114_3475.JPEG 3
n01667114/n01667114_3479.JPEG 3
n01667114/n01667114_3481.JPEG 3
n01667114/n01667114_3486.JPEG 3
n01667114/n01667114_3487.JPEG 3
n01667114/n01667114_3499.JPEG 3
n01667114/n01667114_3512.JPEG 3
n01667114/n01667114_3514.JPEG 3
n01667114/n01667114_3528.JPEG 3
n01667114/n01667114_3539.JPEG 3
n01667114/n01667114_356.JPEG 3
n01667114/n01667114_3571.JPEG 3
n01667114/n01667114_3581.JPEG 3
n01667114/n01667114_3586.JPEG 3
n01667114/n01667114_3594.JPEG 3
n01667114/n01667114_3595.JPEG 3
n01667114/n01667114_3605.JPEG 3
n01667114/n01667114_3611.JPEG 3
n01667114/n01667114_3612.JPEG 3
n01667114/n01667114_3617.JPEG 3
n01667114/n01667114_3622.JPEG 3
n01667114/n01667114_3627.JPEG 3
n01667114/n01667114_3641.JPEG 3
n01667114/n01667114_3656.JPEG 3
n01667114/n01667114_3658.JPEG 3
n01667114/n01667114_3661.JPEG 3
n01667114/n01667114_3666.JPEG 3
n01667114/n01667114_3669.JPEG 3
n01667114/n01667114_367.JPEG 3
n01667114/n01667114_3679.JPEG 3
n01667114/n01667114_369.JPEG 3
n01667114/n01667114_3690.JPEG 3
n01667114/n01667114_3701.JPEG 3
n01667114/n01667114_3719.JPEG 3
n01667114/n01667114_372.JPEG 3
n01667114/n01667114_3721.JPEG 3
n01667114/n01667114_3729.JPEG 3
n01667114/n01667114_3730.JPEG 3
n01667114/n01667114_3737.JPEG 3
n01667114/n01667114_3738.JPEG 3
n01667114/n01667114_3742.JPEG 3
n01667114/n01667114_3746.JPEG 3
n01667114/n01667114_3757.JPEG 3
n01667114/n01667114_377.JPEG 3
n01667114/n01667114_3777.JPEG 3
n01667114/n01667114_3779.JPEG 3
n01667114/n01667114_3783.JPEG 3
n01667114/n01667114_3784.JPEG 3
n01667114/n01667114_3788.JPEG 3
n01667114/n01667114_3790.JPEG 3
n01667114/n01667114_3791.JPEG 3
n01667114/n01667114_3793.JPEG 3
n01667114/n01667114_3794.JPEG 3
n01667114/n01667114_38.JPEG 3
n01667114/n01667114_3806.JPEG 3
n01667114/n01667114_3807.JPEG 3
n01667114/n01667114_381.JPEG 3
n01667114/n01667114_3813.JPEG 3
n01667114/n01667114_3815.JPEG 3
n01667114/n01667114_3821.JPEG 3
n01667114/n01667114_3822.JPEG 3
n01667114/n01667114_3827.JPEG 3
n01667114/n01667114_3830.JPEG 3
n01667114/n01667114_3832.JPEG 3
n01667114/n01667114_3844.JPEG 3
n01667114/n01667114_3847.JPEG 3
n01667114/n01667114_3852.JPEG 3
n01667114/n01667114_3853.JPEG 3
n01667114/n01667114_3859.JPEG 3
n01667114/n01667114_386.JPEG 3
n01667114/n01667114_3864.JPEG 3
n01667114/n01667114_3868.JPEG 3
n01667114/n01667114_3879.JPEG 3
n01667114/n01667114_3880.JPEG 3
n01667114/n01667114_3881.JPEG 3
n01667114/n01667114_3889.JPEG 3
n01667114/n01667114_3892.JPEG 3
n01667114/n01667114_3896.JPEG 3
n01667114/n01667114_39.JPEG 3
n01667114/n01667114_3911.JPEG 3
n01667114/n01667114_3912.JPEG 3
n01667114/n01667114_3913.JPEG 3
n01667114/n01667114_3917.JPEG 3
n01667114/n01667114_3931.JPEG 3
n01667114/n01667114_3943.JPEG 3
n01667114/n01667114_3944.JPEG 3
n01667114/n01667114_3946.JPEG 3
n01667114/n01667114_3949.JPEG 3
n01667114/n01667114_3952.JPEG 3
n01667114/n01667114_3954.JPEG 3
n01667114/n01667114_3957.JPEG 3
n01667114/n01667114_3959.JPEG 3
n01667114/n01667114_397.JPEG 3
n01667114/n01667114_3970.JPEG 3
n01667114/n01667114_3988.JPEG 3
n01667114/n01667114_3993.JPEG 3
n01667114/n01667114_4004.JPEG 3
n01667114/n01667114_4009.JPEG 3
n01667114/n01667114_4013.JPEG 3
n01667114/n01667114_4021.JPEG 3
n01667114/n01667114_4023.JPEG 3
n01667114/n01667114_4026.JPEG 3
n01667114/n01667114_4029.JPEG 3
n01667114/n01667114_4045.JPEG 3
n01667114/n01667114_4049.JPEG 3
n01667114/n01667114_4057.JPEG 3
n01667114/n01667114_4059.JPEG 3
n01667114/n01667114_4067.JPEG 3
n01667114/n01667114_4071.JPEG 3
n01667114/n01667114_4073.JPEG 3
n01667114/n01667114_4081.JPEG 3
n01667114/n01667114_4084.JPEG 3
n01667114/n01667114_4085.JPEG 3
n01667114/n01667114_41.JPEG 3
n01667114/n01667114_4102.JPEG 3
n01667114/n01667114_4104.JPEG 3
n01667114/n01667114_4106.JPEG 3
n01667114/n01667114_4109.JPEG 3
n01667114/n01667114_4113.JPEG 3
n01667114/n01667114_4123.JPEG 3
n01667114/n01667114_4125.JPEG 3
n01667114/n01667114_4130.JPEG 3
n01667114/n01667114_4131.JPEG 3
n01667114/n01667114_4141.JPEG 3
n01667114/n01667114_4157.JPEG 3
n01667114/n01667114_4173.JPEG 3
n01667114/n01667114_4175.JPEG 3
n01667114/n01667114_4184.JPEG 3
n01667114/n01667114_4188.JPEG 3
n01667114/n01667114_4194.JPEG 3
n01667114/n01667114_4200.JPEG 3
n01667114/n01667114_4201.JPEG 3
n01667114/n01667114_4202.JPEG 3
n01667114/n01667114_4205.JPEG 3
n01667114/n01667114_4207.JPEG 3
n01667114/n01667114_4208.JPEG 3
n01667114/n01667114_4215.JPEG 3
n01667114/n01667114_4221.JPEG 3
n01667114/n01667114_4224.JPEG 3
n01667114/n01667114_4231.JPEG 3
n01667114/n01667114_4236.JPEG 3
n01667114/n01667114_4239.JPEG 3
n01667114/n01667114_4240.JPEG 3
n01667114/n01667114_4241.JPEG 3
n01667114/n01667114_4242.JPEG 3
n01667114/n01667114_4245.JPEG 3
n01667114/n01667114_4246.JPEG 3
n01667114/n01667114_4247.JPEG 3
n01667114/n01667114_4256.JPEG 3
n01667114/n01667114_4258.JPEG 3
n01667114/n01667114_4266.JPEG 3
n01667114/n01667114_4268.JPEG 3
n01667114/n01667114_4273.JPEG 3
n01667114/n01667114_4282.JPEG 3
n01667114/n01667114_4284.JPEG 3
n01667114/n01667114_4285.JPEG 3
n01667114/n01667114_4287.JPEG 3
n01667114/n01667114_4295.JPEG 3
n01667114/n01667114_43.JPEG 3
n01667114/n01667114_4307.JPEG 3
n01667114/n01667114_4308.JPEG 3
n01667114/n01667114_4309.JPEG 3
n01667114/n01667114_4312.JPEG 3
n01667114/n01667114_432.JPEG 3
n01667114/n01667114_4335.JPEG 3
n01667114/n01667114_4348.JPEG 3
n01667114/n01667114_4357.JPEG 3
n01667114/n01667114_4359.JPEG 3
n01667114/n01667114_4360.JPEG 3
n01667114/n01667114_4364.JPEG 3
n01667114/n01667114_4367.JPEG 3
n01667114/n01667114_4375.JPEG 3
n01667114/n01667114_4376.JPEG 3
n01667114/n01667114_4382.JPEG 3
n01667114/n01667114_4383.JPEG 3
n01667114/n01667114_4388.JPEG 3
n01667114/n01667114_4399.JPEG 3
n01667114/n01667114_4404.JPEG 3
n01667114/n01667114_4406.JPEG 3
n01667114/n01667114_4410.JPEG 3
n01667114/n01667114_4411.JPEG 3
n01667114/n01667114_4417.JPEG 3
n01667114/n01667114_4424.JPEG 3
n01667114/n01667114_4429.JPEG 3
n01667114/n01667114_4432.JPEG 3
n01667114/n01667114_4434.JPEG 3
n01667114/n01667114_4435.JPEG 3
n01667114/n01667114_4441.JPEG 3
n01667114/n01667114_4443.JPEG 3
n01667114/n01667114_4445.JPEG 3
n01667114/n01667114_4446.JPEG 3
n01667114/n01667114_4449.JPEG 3
n01667114/n01667114_445.JPEG 3
n01667114/n01667114_4454.JPEG 3
n01667114/n01667114_4455.JPEG 3
n01667114/n01667114_4460.JPEG 3
n01667114/n01667114_4462.JPEG 3
n01667114/n01667114_4471.JPEG 3
n01667114/n01667114_4472.JPEG 3
n01667114/n01667114_4479.JPEG 3
n01667114/n01667114_4483.JPEG 3
n01667114/n01667114_4491.JPEG 3
n01667114/n01667114_4493.JPEG 3
n01667114/n01667114_45.JPEG 3
n01667114/n01667114_4500.JPEG 3
n01667114/n01667114_4501.JPEG 3
n01667114/n01667114_4505.JPEG 3
n01667114/n01667114_4510.JPEG 3
n01667114/n01667114_4513.JPEG 3
n01667114/n01667114_4517.JPEG 3
n01667114/n01667114_4520.JPEG 3
n01667114/n01667114_4523.JPEG 3
n01667114/n01667114_4530.JPEG 3
n01667114/n01667114_4536.JPEG 3
n01667114/n01667114_4541.JPEG 3
n01667114/n01667114_4551.JPEG 3
n01667114/n01667114_4553.JPEG 3
n01667114/n01667114_4562.JPEG 3
n01667114/n01667114_457.JPEG 3
n01667114/n01667114_4577.JPEG 3
n01667114/n01667114_4582.JPEG 3
n01667114/n01667114_4597.JPEG 3
n01667114/n01667114_4602.JPEG 3
n01667114/n01667114_4613.JPEG 3
n01667114/n01667114_4618.JPEG 3
n01667114/n01667114_4620.JPEG 3
n01667114/n01667114_4639.JPEG 3
n01667114/n01667114_4641.JPEG 3
n01667114/n01667114_4655.JPEG 3
n01667114/n01667114_4664.JPEG 3
n01667114/n01667114_4685.JPEG 3
n01667114/n01667114_4691.JPEG 3
n01667114/n01667114_4707.JPEG 3
n01667114/n01667114_4709.JPEG 3
n01667114/n01667114_472.JPEG 3
n01667114/n01667114_4724.JPEG 3
n01667114/n01667114_4733.JPEG 3
n01667114/n01667114_4750.JPEG 3
n01667114/n01667114_4767.JPEG 3
n01667114/n01667114_4773.JPEG 3
n01667114/n01667114_4774.JPEG 3
n01667114/n01667114_4783.JPEG 3
n01667114/n01667114_4788.JPEG 3
n01667114/n01667114_4792.JPEG 3
n01667114/n01667114_4796.JPEG 3
n01667114/n01667114_4817.JPEG 3
n01667114/n01667114_4821.JPEG 3
n01667114/n01667114_4839.JPEG 3
n01667114/n01667114_4842.JPEG 3
n01667114/n01667114_4843.JPEG 3
n01667114/n01667114_4848.JPEG 3
n01667114/n01667114_4850.JPEG 3
n01667114/n01667114_4852.JPEG 3
n01667114/n01667114_4853.JPEG 3
n01667114/n01667114_4854.JPEG 3
n01667114/n01667114_4855.JPEG 3
n01667114/n01667114_4859.JPEG 3
n01667114/n01667114_4882.JPEG 3
n01667114/n01667114_4885.JPEG 3
n01667114/n01667114_4891.JPEG 3
n01667114/n01667114_4893.JPEG 3
n01667114/n01667114_4897.JPEG 3
n01667114/n01667114_4903.JPEG 3
n01667114/n01667114_4912.JPEG 3
n01667114/n01667114_4915.JPEG 3
n01667114/n01667114_4918.JPEG 3
n01667114/n01667114_4922.JPEG 3
n01667114/n01667114_4923.JPEG 3
n01667114/n01667114_4924.JPEG 3
n01667114/n01667114_4927.JPEG 3
n01667114/n01667114_4939.JPEG 3
n01667114/n01667114_4941.JPEG 3
n01667114/n01667114_4944.JPEG 3
n01667114/n01667114_4953.JPEG 3
n01667114/n01667114_4955.JPEG 3
n01667114/n01667114_4967.JPEG 3
n01667114/n01667114_4974.JPEG 3
n01667114/n01667114_4977.JPEG 3
n01667114/n01667114_4983.JPEG 3
n01667114/n01667114_4988.JPEG 3
n01667114/n01667114_4991.JPEG 3
n01667114/n01667114_5002.JPEG 3
n01667114/n01667114_5018.JPEG 3
n01667114/n01667114_5020.JPEG 3
n01667114/n01667114_505.JPEG 3
n01667114/n01667114_5072.JPEG 3
n01667114/n01667114_5104.JPEG 3
n01667114/n01667114_5124.JPEG 3
n01667114/n01667114_5135.JPEG 3
n01667114/n01667114_515.JPEG 3
n01667114/n01667114_5161.JPEG 3
n01667114/n01667114_5183.JPEG 3
n01667114/n01667114_520.JPEG 3
n01667114/n01667114_5208.JPEG 3
n01667114/n01667114_5232.JPEG 3
n01667114/n01667114_528.JPEG 3
n01667114/n01667114_5280.JPEG 3
n01667114/n01667114_5284.JPEG 3
n01667114/n01667114_53.JPEG 3
n01667114/n01667114_5377.JPEG 3
n01667114/n01667114_5380.JPEG 3
n01667114/n01667114_5387.JPEG 3
n01667114/n01667114_5398.JPEG 3
n01667114/n01667114_5403.JPEG 3
n01667114/n01667114_5429.JPEG 3
n01667114/n01667114_5444.JPEG 3
n01667114/n01667114_5468.JPEG 3
n01667114/n01667114_547.JPEG 3
n01667114/n01667114_5475.JPEG 3
n01667114/n01667114_5506.JPEG 3
n01667114/n01667114_5526.JPEG 3
n01667114/n01667114_5530.JPEG 3
n01667114/n01667114_5560.JPEG 3
n01667114/n01667114_5571.JPEG 3
n01667114/n01667114_5580.JPEG 3
n01667114/n01667114_5587.JPEG 3
n01667114/n01667114_5588.JPEG 3
n01667114/n01667114_5636.JPEG 3
n01667114/n01667114_5665.JPEG 3
n01667114/n01667114_5696.JPEG 3
n01667114/n01667114_5698.JPEG 3
n01667114/n01667114_57.JPEG 3
n01667114/n01667114_5705.JPEG 3
n01667114/n01667114_5708.JPEG 3
n01667114/n01667114_5711.JPEG 3
n01667114/n01667114_5735.JPEG 3
n01667114/n01667114_575.JPEG 3
n01667114/n01667114_5755.JPEG 3
n01667114/n01667114_5838.JPEG 3
n01667114/n01667114_5863.JPEG 3
n01667114/n01667114_590.JPEG 3
n01667114/n01667114_5919.JPEG 3
n01667114/n01667114_595.JPEG 3
n01667114/n01667114_6051.JPEG 3
n01667114/n01667114_6058.JPEG 3
n01667114/n01667114_6062.JPEG 3
n01667114/n01667114_6074.JPEG 3
n01667114/n01667114_608.JPEG 3
n01667114/n01667114_6082.JPEG 3
n01667114/n01667114_609.JPEG 3
n01667114/n01667114_6090.JPEG 3
n01667114/n01667114_613.JPEG 3
n01667114/n01667114_615.JPEG 3
n01667114/n01667114_617.JPEG 3
n01667114/n01667114_6173.JPEG 3
n01667114/n01667114_6195.JPEG 3
n01667114/n01667114_62.JPEG 3
n01667114/n01667114_6222.JPEG 3
n01667114/n01667114_6242.JPEG 3
n01667114/n01667114_6249.JPEG 3
n01667114/n01667114_6250.JPEG 3
n01667114/n01667114_6264.JPEG 3
n01667114/n01667114_6280.JPEG 3
n01667114/n01667114_63.JPEG 3
n01667114/n01667114_6335.JPEG 3
n01667114/n01667114_6361.JPEG 3
n01667114/n01667114_6371.JPEG 3
n01667114/n01667114_638.JPEG 3
n01667114/n01667114_6399.JPEG 3
n01667114/n01667114_642.JPEG 3
n01667114/n01667114_6520.JPEG 3
n01667114/n01667114_6522.JPEG 3
n01667114/n01667114_653.JPEG 3
n01667114/n01667114_6594.JPEG 3
n01667114/n01667114_6595.JPEG 3
n01667114/n01667114_6638.JPEG 3
n01667114/n01667114_6647.JPEG 3
n01667114/n01667114_6662.JPEG 3
n01667114/n01667114_6676.JPEG 3
n01667114/n01667114_670.JPEG 3
n01667114/n01667114_6721.JPEG 3
n01667114/n01667114_6725.JPEG 3
n01667114/n01667114_6738.JPEG 3
n01667114/n01667114_676.JPEG 3
n01667114/n01667114_6768.JPEG 3
n01667114/n01667114_6809.JPEG 3
n01667114/n01667114_6813.JPEG 3
n01667114/n01667114_6830.JPEG 3
n01667114/n01667114_684.JPEG 3
n01667114/n01667114_6877.JPEG 3
n01667114/n01667114_692.JPEG 3
n01667114/n01667114_6962.JPEG 3
n01667114/n01667114_6973.JPEG 3
n01667114/n01667114_702.JPEG 3
n01667114/n01667114_7069.JPEG 3
n01667114/n01667114_7161.JPEG 3
n01667114/n01667114_7167.JPEG 3
n01667114/n01667114_7182.JPEG 3
n01667114/n01667114_722.JPEG 3
n01667114/n01667114_7276.JPEG 3
n01667114/n01667114_7284.JPEG 3
n01667114/n01667114_73.JPEG 3
n01667114/n01667114_7322.JPEG 3
n01667114/n01667114_7333.JPEG 3
n01667114/n01667114_7335.JPEG 3
n01667114/n01667114_7377.JPEG 3
n01667114/n01667114_74.JPEG 3
n01667114/n01667114_741.JPEG 3
n01667114/n01667114_7414.JPEG 3
n01667114/n01667114_7423.JPEG 3
n01667114/n01667114_7443.JPEG 3
n01667114/n01667114_745.JPEG 3
n01667114/n01667114_7453.JPEG 3
n01667114/n01667114_7454.JPEG 3
n01667114/n01667114_7469.JPEG 3
n01667114/n01667114_7479.JPEG 3
n01667114/n01667114_7480.JPEG 3
n01667114/n01667114_7496.JPEG 3
n01667114/n01667114_75.JPEG 3
n01667114/n01667114_754.JPEG 3
n01667114/n01667114_7578.JPEG 3
n01667114/n01667114_759.JPEG 3
n01667114/n01667114_76.JPEG 3
n01667114/n01667114_7609.JPEG 3
n01667114/n01667114_7616.JPEG 3
n01667114/n01667114_762.JPEG 3
n01667114/n01667114_7693.JPEG 3
n01667114/n01667114_7713.JPEG 3
n01667114/n01667114_7745.JPEG 3
n01667114/n01667114_7758.JPEG 3
n01667114/n01667114_7792.JPEG 3
n01667114/n01667114_7818.JPEG 3
n01667114/n01667114_788.JPEG 3
n01667114/n01667114_79.JPEG 3
n01667114/n01667114_7903.JPEG 3
n01667114/n01667114_796.JPEG 3
n01667114/n01667114_7974.JPEG 3
n01667114/n01667114_7979.JPEG 3
n01667114/n01667114_7994.JPEG 3
n01667114/n01667114_80.JPEG 3
n01667114/n01667114_8016.JPEG 3
n01667114/n01667114_8023.JPEG 3
n01667114/n01667114_8047.JPEG 3
n01667114/n01667114_807.JPEG 3
n01667114/n01667114_808.JPEG 3
n01667114/n01667114_8094.JPEG 3
n01667114/n01667114_8106.JPEG 3
n01667114/n01667114_8113.JPEG 3
n01667114/n01667114_8118.JPEG 3
n01667114/n01667114_812.JPEG 3
n01667114/n01667114_8127.JPEG 3
n01667114/n01667114_8131.JPEG 3
n01667114/n01667114_8194.JPEG 3
n01667114/n01667114_82.JPEG 3
n01667114/n01667114_820.JPEG 3
n01667114/n01667114_821.JPEG 3
n01667114/n01667114_8210.JPEG 3
n01667114/n01667114_8254.JPEG 3
n01667114/n01667114_826.JPEG 3
n01667114/n01667114_8275.JPEG 3
n01667114/n01667114_837.JPEG 3
n01667114/n01667114_8385.JPEG 3
n01667114/n01667114_8404.JPEG 3
n01667114/n01667114_8439.JPEG 3
n01667114/n01667114_8462.JPEG 3
n01667114/n01667114_8478.JPEG 3
n01667114/n01667114_8483.JPEG 3
n01667114/n01667114_849.JPEG 3
n01667114/n01667114_8602.JPEG 3
n01667114/n01667114_8613.JPEG 3
n01667114/n01667114_8633.JPEG 3
n01667114/n01667114_866.JPEG 3
n01667114/n01667114_8679.JPEG 3
n01667114/n01667114_870.JPEG 3
n01667114/n01667114_871.JPEG 3
n01667114/n01667114_8711.JPEG 3
n01667114/n01667114_8740.JPEG 3
n01667114/n01667114_8744.JPEG 3
n01667114/n01667114_8778.JPEG 3
n01667114/n01667114_88.JPEG 3
n01667114/n01667114_8819.JPEG 3
n01667114/n01667114_8854.JPEG 3
n01667114/n01667114_8864.JPEG 3
n01667114/n01667114_8866.JPEG 3
n01667114/n01667114_8868.JPEG 3
n01667114/n01667114_887.JPEG 3
n01667114/n01667114_8881.JPEG 3
n01667114/n01667114_8887.JPEG 3
n01667114/n01667114_892.JPEG 3
n01667114/n01667114_8947.JPEG 3
n01667114/n01667114_90.JPEG 3
n01667114/n01667114_902.JPEG 3
n01667114/n01667114_9043.JPEG 3
n01667114/n01667114_9049.JPEG 3
n01667114/n01667114_9063.JPEG 3
n01667114/n01667114_9064.JPEG 3
n01667114/n01667114_9066.JPEG 3
n01667114/n01667114_9084.JPEG 3
n01667114/n01667114_91.JPEG 3
n01667114/n01667114_9186.JPEG 3
n01667114/n01667114_9216.JPEG 3
n01667114/n01667114_927.JPEG 3
n01667114/n01667114_9270.JPEG 3
n01667114/n01667114_928.JPEG 3
n01667114/n01667114_930.JPEG 3
n01667114/n01667114_932.JPEG 3
n01667114/n01667114_9321.JPEG 3
n01667114/n01667114_934.JPEG 3
n01667114/n01667114_937.JPEG 3
n01667114/n01667114_938.JPEG 3
n01667114/n01667114_9383.JPEG 3
n01667114/n01667114_9389.JPEG 3
n01667114/n01667114_9396.JPEG 3
n01667114/n01667114_9402.JPEG 3
n01667114/n01667114_9412.JPEG 3
n01667114/n01667114_9416.JPEG 3
n01667114/n01667114_9454.JPEG 3
n01667114/n01667114_9469.JPEG 3
n01667114/n01667114_9472.JPEG 3
n01667114/n01667114_948.JPEG 3
n01667114/n01667114_9494.JPEG 3
n01667114/n01667114_9498.JPEG 3
n01667114/n01667114_950.JPEG 3
n01667114/n01667114_951.JPEG 3
n01667114/n01667114_9522.JPEG 3
n01667114/n01667114_9524.JPEG 3
n01667114/n01667114_9556.JPEG 3
n01667114/n01667114_957.JPEG 3
n01667114/n01667114_9572.JPEG 3
n01667114/n01667114_9598.JPEG 3
n01667114/n01667114_960.JPEG 3
n01667114/n01667114_9602.JPEG 3
n01667114/n01667114_9610.JPEG 3
n01667114/n01667114_9616.JPEG 3
n01667114/n01667114_964.JPEG 3
n01667114/n01667114_965.JPEG 3
n01667114/n01667114_9651.JPEG 3
n01667114/n01667114_9670.JPEG 3
n01667114/n01667114_9674.JPEG 3
n01667114/n01667114_9675.JPEG 3
n01667114/n01667114_9676.JPEG 3
n01667114/n01667114_968.JPEG 3
n01667114/n01667114_971.JPEG 3
n01667114/n01667114_972.JPEG 3
n01667114/n01667114_9769.JPEG 3
n01667114/n01667114_9792.JPEG 3
n01667114/n01667114_9830.JPEG 3
n01667114/n01667114_9840.JPEG 3
n01667114/n01667114_9849.JPEG 3
n01667114/n01667114_990.JPEG 3
n01667114/n01667114_9907.JPEG 3
n01667114/n01667114_993.JPEG 3
n01667114/n01667114_9930.JPEG 3
n01667114/n01667114_9967.JPEG 3
n01667114/n01667114_9971.JPEG 3
n01667114/n01667114_9976.JPEG 3
n01667114/n01667114_9979.JPEG 3
n01667114/n01667114_9985.JPEG 3
n01667778/n01667778_10024.JPEG 3
n01667778/n01667778_10032.JPEG 3
n01667778/n01667778_1009.JPEG 3
n01667778/n01667778_10097.JPEG 3
n01667778/n01667778_10122.JPEG 3
n01667778/n01667778_10136.JPEG 3
n01667778/n01667778_10180.JPEG 3
n01667778/n01667778_10186.JPEG 3
n01667778/n01667778_1019.JPEG 3
n01667778/n01667778_10212.JPEG 3
n01667778/n01667778_10289.JPEG 3
n01667778/n01667778_1029.JPEG 3
n01667778/n01667778_10350.JPEG 3
n01667778/n01667778_10357.JPEG 3
n01667778/n01667778_1036.JPEG 3
n01667778/n01667778_10405.JPEG 3
n01667778/n01667778_10408.JPEG 3
n01667778/n01667778_10411.JPEG 3
n01667778/n01667778_10414.JPEG 3
n01667778/n01667778_10425.JPEG 3
n01667778/n01667778_1049.JPEG 3
n01667778/n01667778_10497.JPEG 3
n01667778/n01667778_10505.JPEG 3
n01667778/n01667778_10519.JPEG 3
n01667778/n01667778_1055.JPEG 3
n01667778/n01667778_10563.JPEG 3
n01667778/n01667778_10603.JPEG 3
n01667778/n01667778_10629.JPEG 3
n01667778/n01667778_1064.JPEG 3
n01667778/n01667778_10668.JPEG 3
n01667778/n01667778_10673.JPEG 3
n01667778/n01667778_10734.JPEG 3
n01667778/n01667778_10795.JPEG 3
n01667778/n01667778_108.JPEG 3
n01667778/n01667778_10816.JPEG 3
n01667778/n01667778_10819.JPEG 3
n01667778/n01667778_10836.JPEG 3
n01667778/n01667778_1087.JPEG 3
n01667778/n01667778_10881.JPEG 3
n01667778/n01667778_10885.JPEG 3
n01667778/n01667778_10893.JPEG 3
n01667778/n01667778_10901.JPEG 3
n01667778/n01667778_10917.JPEG 3
n01667778/n01667778_1095.JPEG 3
n01667778/n01667778_10967.JPEG 3
n01667778/n01667778_10971.JPEG 3
n01667778/n01667778_1098.JPEG 3
n01667778/n01667778_10986.JPEG 3
n01667778/n01667778_1101.JPEG 3
n01667778/n01667778_11013.JPEG 3
n01667778/n01667778_1102.JPEG 3
n01667778/n01667778_11038.JPEG 3
n01667778/n01667778_11052.JPEG 3
n01667778/n01667778_11075.JPEG 3
n01667778/n01667778_11078.JPEG 3
n01667778/n01667778_11094.JPEG 3
n01667778/n01667778_11131.JPEG 3
n01667778/n01667778_11152.JPEG 3
n01667778/n01667778_11162.JPEG 3
n01667778/n01667778_11172.JPEG 3
n01667778/n01667778_11203.JPEG 3
n01667778/n01667778_11221.JPEG 3
n01667778/n01667778_11260.JPEG 3
n01667778/n01667778_11268.JPEG 3
n01667778/n01667778_1129.JPEG 3
n01667778/n01667778_11332.JPEG 3
n01667778/n01667778_11342.JPEG 3
n01667778/n01667778_11372.JPEG 3
n01667778/n01667778_11379.JPEG 3
n01667778/n01667778_11409.JPEG 3
n01667778/n01667778_1142.JPEG 3
n01667778/n01667778_11430.JPEG 3
n01667778/n01667778_11431.JPEG 3
n01667778/n01667778_11441.JPEG 3
n01667778/n01667778_11455.JPEG 3
n01667778/n01667778_11487.JPEG 3
n01667778/n01667778_11505.JPEG 3
n01667778/n01667778_11513.JPEG 3
n01667778/n01667778_11564.JPEG 3
n01667778/n01667778_11590.JPEG 3
n01667778/n01667778_11595.JPEG 3
n01667778/n01667778_11630.JPEG 3
n01667778/n01667778_11639.JPEG 3
n01667778/n01667778_1164.JPEG 3
n01667778/n01667778_11654.JPEG 3
n01667778/n01667778_1166.JPEG 3
n01667778/n01667778_11662.JPEG 3
n01667778/n01667778_11669.JPEG 3
n01667778/n01667778_11692.JPEG 3
n01667778/n01667778_11723.JPEG 3
n01667778/n01667778_1173.JPEG 3
n01667778/n01667778_11752.JPEG 3
n01667778/n01667778_11783.JPEG 3
n01667778/n01667778_11803.JPEG 3
n01667778/n01667778_1184.JPEG 3
n01667778/n01667778_1185.JPEG 3
n01667778/n01667778_11872.JPEG 3
n01667778/n01667778_11883.JPEG 3
n01667778/n01667778_1189.JPEG 3
n01667778/n01667778_11915.JPEG 3
n01667778/n01667778_11930.JPEG 3
n01667778/n01667778_11958.JPEG 3
n01667778/n01667778_11974.JPEG 3
n01667778/n01667778_12001.JPEG 3
n01667778/n01667778_12003.JPEG 3
n01667778/n01667778_12008.JPEG 3
n01667778/n01667778_12019.JPEG 3
n01667778/n01667778_12047.JPEG 3
n01667778/n01667778_1205.JPEG 3
n01667778/n01667778_12060.JPEG 3
n01667778/n01667778_1207.JPEG 3
n01667778/n01667778_12071.JPEG 3
n01667778/n01667778_12078.JPEG 3
n01667778/n01667778_1208.JPEG 3
n01667778/n01667778_1210.JPEG 3
n01667778/n01667778_12100.JPEG 3
n01667778/n01667778_12105.JPEG 3
n01667778/n01667778_1211.JPEG 3
n01667778/n01667778_12119.JPEG 3
n01667778/n01667778_12182.JPEG 3
n01667778/n01667778_12200.JPEG 3
n01667778/n01667778_1222.JPEG 3
n01667778/n01667778_12230.JPEG 3
n01667778/n01667778_12252.JPEG 3
n01667778/n01667778_12283.JPEG 3
n01667778/n01667778_12321.JPEG 3
n01667778/n01667778_12363.JPEG 3
n01667778/n01667778_12364.JPEG 3
n01667778/n01667778_12369.JPEG 3
n01667778/n01667778_12382.JPEG 3
n01667778/n01667778_12409.JPEG 3
n01667778/n01667778_12415.JPEG 3
n01667778/n01667778_12437.JPEG 3
n01667778/n01667778_12444.JPEG 3
n01667778/n01667778_12481.JPEG 3
n01667778/n01667778_12482.JPEG 3
n01667778/n01667778_12487.JPEG 3
n01667778/n01667778_12555.JPEG 3
n01667778/n01667778_12581.JPEG 3
n01667778/n01667778_12584.JPEG 3
n01667778/n01667778_12606.JPEG 3
n01667778/n01667778_12654.JPEG 3
n01667778/n01667778_12702.JPEG 3
n01667778/n01667778_12753.JPEG 3
n01667778/n01667778_1280.JPEG 3
n01667778/n01667778_12831.JPEG 3
n01667778/n01667778_12835.JPEG 3
n01667778/n01667778_12844.JPEG 3
n01667778/n01667778_12853.JPEG 3
n01667778/n01667778_12857.JPEG 3
n01667778/n01667778_12881.JPEG 3
n01667778/n01667778_12897.JPEG 3
n01667778/n01667778_12911.JPEG 3
n01667778/n01667778_12941.JPEG 3
n01667778/n01667778_12954.JPEG 3
n01667778/n01667778_12980.JPEG 3
n01667778/n01667778_12993.JPEG 3
n01667778/n01667778_13003.JPEG 3
n01667778/n01667778_13017.JPEG 3
n01667778/n01667778_13071.JPEG 3
n01667778/n01667778_1308.JPEG 3
n01667778/n01667778_1309.JPEG 3
n01667778/n01667778_13090.JPEG 3
n01667778/n01667778_13109.JPEG 3
n01667778/n01667778_13148.JPEG 3
n01667778/n01667778_13150.JPEG 3
n01667778/n01667778_13185.JPEG 3
n01667778/n01667778_132.JPEG 3
n01667778/n01667778_13212.JPEG 3
n01667778/n01667778_13215.JPEG 3
n01667778/n01667778_13279.JPEG 3
n01667778/n01667778_13286.JPEG 3
n01667778/n01667778_1330.JPEG 3
n01667778/n01667778_13312.JPEG 3
n01667778/n01667778_13318.JPEG 3
n01667778/n01667778_13362.JPEG 3
n01667778/n01667778_13371.JPEG 3
n01667778/n01667778_13388.JPEG 3
n01667778/n01667778_13391.JPEG 3
n01667778/n01667778_134.JPEG 3
n01667778/n01667778_13423.JPEG 3
n01667778/n01667778_13427.JPEG 3
n01667778/n01667778_13529.JPEG 3
n01667778/n01667778_1354.JPEG 3
n01667778/n01667778_13565.JPEG 3
n01667778/n01667778_13619.JPEG 3
n01667778/n01667778_13621.JPEG 3
n01667778/n01667778_13622.JPEG 3
n01667778/n01667778_13627.JPEG 3
n01667778/n01667778_1364.JPEG 3
n01667778/n01667778_13652.JPEG 3
n01667778/n01667778_13659.JPEG 3
n01667778/n01667778_13687.JPEG 3
n01667778/n01667778_13818.JPEG 3
n01667778/n01667778_13822.JPEG 3
n01667778/n01667778_1388.JPEG 3
n01667778/n01667778_13891.JPEG 3
n01667778/n01667778_1390.JPEG 3
n01667778/n01667778_13906.JPEG 3
n01667778/n01667778_13908.JPEG 3
n01667778/n01667778_13938.JPEG 3
n01667778/n01667778_13951.JPEG 3
n01667778/n01667778_13964.JPEG 3
n01667778/n01667778_1399.JPEG 3
n01667778/n01667778_14002.JPEG 3
n01667778/n01667778_14021.JPEG 3
n01667778/n01667778_14066.JPEG 3
n01667778/n01667778_14106.JPEG 3
n01667778/n01667778_14150.JPEG 3
n01667778/n01667778_14189.JPEG 3
n01667778/n01667778_14197.JPEG 3
n01667778/n01667778_142.JPEG 3
n01667778/n01667778_1422.JPEG 3
n01667778/n01667778_1426.JPEG 3
n01667778/n01667778_14331.JPEG 3
n01667778/n01667778_14364.JPEG 3
n01667778/n01667778_14402.JPEG 3
n01667778/n01667778_14408.JPEG 3
n01667778/n01667778_14417.JPEG 3
n01667778/n01667778_1443.JPEG 3
n01667778/n01667778_1445.JPEG 3
n01667778/n01667778_14452.JPEG 3
n01667778/n01667778_14481.JPEG 3
n01667778/n01667778_1451.JPEG 3
n01667778/n01667778_14515.JPEG 3
n01667778/n01667778_14527.JPEG 3
n01667778/n01667778_1454.JPEG 3
n01667778/n01667778_14542.JPEG 3
n01667778/n01667778_14576.JPEG 3
n01667778/n01667778_14601.JPEG 3
n01667778/n01667778_14626.JPEG 3
n01667778/n01667778_1463.JPEG 3
n01667778/n01667778_14654.JPEG 3
n01667778/n01667778_1469.JPEG 3
n01667778/n01667778_14696.JPEG 3
n01667778/n01667778_14744.JPEG 3
n01667778/n01667778_14797.JPEG 3
n01667778/n01667778_14808.JPEG 3
n01667778/n01667778_14911.JPEG 3
n01667778/n01667778_14973.JPEG 3
n01667778/n01667778_1500.JPEG 3
n01667778/n01667778_15012.JPEG 3
n01667778/n01667778_15066.JPEG 3
n01667778/n01667778_15115.JPEG 3
n01667778/n01667778_1516.JPEG 3
n01667778/n01667778_1517.JPEG 3
n01667778/n01667778_152.JPEG 3
n01667778/n01667778_15243.JPEG 3
n01667778/n01667778_15247.JPEG 3
n01667778/n01667778_15342.JPEG 3
n01667778/n01667778_1539.JPEG 3
n01667778/n01667778_15463.JPEG 3
n01667778/n01667778_15506.JPEG 3
n01667778/n01667778_156.JPEG 3
n01667778/n01667778_15612.JPEG 3
n01667778/n01667778_15640.JPEG 3
n01667778/n01667778_15644.JPEG 3
n01667778/n01667778_15652.JPEG 3
n01667778/n01667778_1566.JPEG 3
n01667778/n01667778_15660.JPEG 3
n01667778/n01667778_15681.JPEG 3
n01667778/n01667778_15698.JPEG 3
n01667778/n01667778_15726.JPEG 3
n01667778/n01667778_1576.JPEG 3
n01667778/n01667778_15767.JPEG 3
n01667778/n01667778_1579.JPEG 3
n01667778/n01667778_15827.JPEG 3
n01667778/n01667778_1584.JPEG 3
n01667778/n01667778_15864.JPEG 3
n01667778/n01667778_15877.JPEG 3
n01667778/n01667778_1589.JPEG 3
n01667778/n01667778_159.JPEG 3
n01667778/n01667778_15900.JPEG 3
n01667778/n01667778_15959.JPEG 3
n01667778/n01667778_15965.JPEG 3
n01667778/n01667778_1597.JPEG 3
n01667778/n01667778_1601.JPEG 3
n01667778/n01667778_1603.JPEG 3
n01667778/n01667778_16033.JPEG 3
n01667778/n01667778_16034.JPEG 3
n01667778/n01667778_1604.JPEG 3
n01667778/n01667778_16052.JPEG 3
n01667778/n01667778_1607.JPEG 3
n01667778/n01667778_16096.JPEG 3
n01667778/n01667778_16133.JPEG 3
n01667778/n01667778_16158.JPEG 3
n01667778/n01667778_16183.JPEG 3
n01667778/n01667778_16239.JPEG 3
n01667778/n01667778_16250.JPEG 3
n01667778/n01667778_16281.JPEG 3
n01667778/n01667778_16285.JPEG 3
n01667778/n01667778_16294.JPEG 3
n01667778/n01667778_16295.JPEG 3
n01667778/n01667778_163.JPEG 3
n01667778/n01667778_16338.JPEG 3
n01667778/n01667778_16356.JPEG 3
n01667778/n01667778_16387.JPEG 3
n01667778/n01667778_16448.JPEG 3
n01667778/n01667778_1654.JPEG 3
n01667778/n01667778_16581.JPEG 3
n01667778/n01667778_16584.JPEG 3
n01667778/n01667778_1660.JPEG 3
n01667778/n01667778_16611.JPEG 3
n01667778/n01667778_1662.JPEG 3
n01667778/n01667778_16621.JPEG 3
n01667778/n01667778_16666.JPEG 3
n01667778/n01667778_16705.JPEG 3
n01667778/n01667778_16814.JPEG 3
n01667778/n01667778_16828.JPEG 3
n01667778/n01667778_1684.JPEG 3
n01667778/n01667778_1686.JPEG 3
n01667778/n01667778_1687.JPEG 3
n01667778/n01667778_16873.JPEG 3
n01667778/n01667778_16901.JPEG 3
n01667778/n01667778_16904.JPEG 3
n01667778/n01667778_16945.JPEG 3
n01667778/n01667778_1697.JPEG 3
n01667778/n01667778_1698.JPEG 3
n01667778/n01667778_16998.JPEG 3
n01667778/n01667778_1700.JPEG 3
n01667778/n01667778_1706.JPEG 3
n01667778/n01667778_171.JPEG 3
n01667778/n01667778_17144.JPEG 3
n01667778/n01667778_17160.JPEG 3
n01667778/n01667778_17169.JPEG 3
n01667778/n01667778_17173.JPEG 3
n01667778/n01667778_17189.JPEG 3
n01667778/n01667778_1723.JPEG 3
n01667778/n01667778_17257.JPEG 3
n01667778/n01667778_17372.JPEG 3
n01667778/n01667778_1746.JPEG 3
n01667778/n01667778_17490.JPEG 3
n01667778/n01667778_17494.JPEG 3
n01667778/n01667778_17498.JPEG 3
n01667778/n01667778_17499.JPEG 3
n01667778/n01667778_1755.JPEG 3
n01667778/n01667778_17578.JPEG 3
n01667778/n01667778_17582.JPEG 3
n01667778/n01667778_17615.JPEG 3
n01667778/n01667778_17658.JPEG 3
n01667778/n01667778_17696.JPEG 3
n01667778/n01667778_177.JPEG 3
n01667778/n01667778_17726.JPEG 3
n01667778/n01667778_1776.JPEG 3
n01667778/n01667778_17785.JPEG 3
n01667778/n01667778_17811.JPEG 3
n01667778/n01667778_17812.JPEG 3
n01667778/n01667778_17833.JPEG 3
n01667778/n01667778_17849.JPEG 3
n01667778/n01667778_17852.JPEG 3
n01667778/n01667778_17906.JPEG 3
n01667778/n01667778_17916.JPEG 3
n01667778/n01667778_1795.JPEG 3
n01667778/n01667778_1797.JPEG 3
n01667778/n01667778_18055.JPEG 3
n01667778/n01667778_18063.JPEG 3
n01667778/n01667778_18073.JPEG 3
n01667778/n01667778_18088.JPEG 3
n01667778/n01667778_1812.JPEG 3
n01667778/n01667778_18122.JPEG 3
n01667778/n01667778_18124.JPEG 3
n01667778/n01667778_1813.JPEG 3
n01667778/n01667778_1815.JPEG 3
n01667778/n01667778_18166.JPEG 3
n01667778/n01667778_18229.JPEG 3
n01667778/n01667778_18230.JPEG 3
n01667778/n01667778_18264.JPEG 3
n01667778/n01667778_18275.JPEG 3
n01667778/n01667778_1831.JPEG 3
n01667778/n01667778_18326.JPEG 3
n01667778/n01667778_18386.JPEG 3
n01667778/n01667778_18452.JPEG 3
n01667778/n01667778_18459.JPEG 3
n01667778/n01667778_18509.JPEG 3
n01667778/n01667778_18556.JPEG 3
n01667778/n01667778_18618.JPEG 3
n01667778/n01667778_1864.JPEG 3
n01667778/n01667778_18659.JPEG 3
n01667778/n01667778_18722.JPEG 3
n01667778/n01667778_18727.JPEG 3
n01667778/n01667778_18740.JPEG 3
n01667778/n01667778_18757.JPEG 3
n01667778/n01667778_18782.JPEG 3
n01667778/n01667778_18783.JPEG 3
n01667778/n01667778_18795.JPEG 3
n01667778/n01667778_18813.JPEG 3
n01667778/n01667778_18845.JPEG 3
n01667778/n01667778_18877.JPEG 3
n01667778/n01667778_18889.JPEG 3
n01667778/n01667778_18914.JPEG 3
n01667778/n01667778_18975.JPEG 3
n01667778/n01667778_1898.JPEG 3
n01667778/n01667778_19044.JPEG 3
n01667778/n01667778_1906.JPEG 3
n01667778/n01667778_19075.JPEG 3
n01667778/n01667778_19092.JPEG 3
n01667778/n01667778_19127.JPEG 3
n01667778/n01667778_1914.JPEG 3
n01667778/n01667778_1915.JPEG 3
n01667778/n01667778_19166.JPEG 3
n01667778/n01667778_19239.JPEG 3
n01667778/n01667778_19242.JPEG 3
n01667778/n01667778_19244.JPEG 3
n01667778/n01667778_19257.JPEG 3
n01667778/n01667778_1927.JPEG 3
n01667778/n01667778_19305.JPEG 3
n01667778/n01667778_19313.JPEG 3
n01667778/n01667778_1934.JPEG 3
n01667778/n01667778_19346.JPEG 3
n01667778/n01667778_19358.JPEG 3
n01667778/n01667778_1940.JPEG 3
n01667778/n01667778_1945.JPEG 3
n01667778/n01667778_19485.JPEG 3
n01667778/n01667778_195.JPEG 3
n01667778/n01667778_1952.JPEG 3
n01667778/n01667778_19542.JPEG 3
n01667778/n01667778_19604.JPEG 3
n01667778/n01667778_1964.JPEG 3
n01667778/n01667778_1972.JPEG 3
n01667778/n01667778_19727.JPEG 3
n01667778/n01667778_1973.JPEG 3
n01667778/n01667778_19742.JPEG 3
n01667778/n01667778_19843.JPEG 3
n01667778/n01667778_19889.JPEG 3
n01667778/n01667778_19903.JPEG 3
n01667778/n01667778_1993.JPEG 3
n01667778/n01667778_19943.JPEG 3
n01667778/n01667778_20039.JPEG 3
n01667778/n01667778_2006.JPEG 3
n01667778/n01667778_2008.JPEG 3
n01667778/n01667778_2015.JPEG 3
n01667778/n01667778_20197.JPEG 3
n01667778/n01667778_2020.JPEG 3
n01667778/n01667778_2022.JPEG 3
n01667778/n01667778_2025.JPEG 3
n01667778/n01667778_20332.JPEG 3
n01667778/n01667778_2035.JPEG 3
n01667778/n01667778_2048.JPEG 3
n01667778/n01667778_2075.JPEG 3
n01667778/n01667778_2076.JPEG 3
n01667778/n01667778_2085.JPEG 3
n01667778/n01667778_2094.JPEG 3
n01667778/n01667778_2097.JPEG 3
n01667778/n01667778_210.JPEG 3
n01667778/n01667778_2103.JPEG 3
n01667778/n01667778_21061.JPEG 3
n01667778/n01667778_21080.JPEG 3
n01667778/n01667778_21118.JPEG 3
n01667778/n01667778_2112.JPEG 3
n01667778/n01667778_21124.JPEG 3
n01667778/n01667778_21156.JPEG 3
n01667778/n01667778_21162.JPEG 3
n01667778/n01667778_2118.JPEG 3
n01667778/n01667778_21197.JPEG 3
n01667778/n01667778_21215.JPEG 3
n01667778/n01667778_21253.JPEG 3
n01667778/n01667778_21289.JPEG 3
n01667778/n01667778_213.JPEG 3
n01667778/n01667778_2130.JPEG 3
n01667778/n01667778_21327.JPEG 3
n01667778/n01667778_21336.JPEG 3
n01667778/n01667778_21355.JPEG 3
n01667778/n01667778_21367.JPEG 3
n01667778/n01667778_21381.JPEG 3
n01667778/n01667778_21433.JPEG 3
n01667778/n01667778_2145.JPEG 3
n01667778/n01667778_21461.JPEG 3
n01667778/n01667778_2148.JPEG 3
n01667778/n01667778_21534.JPEG 3
n01667778/n01667778_21546.JPEG 3
n01667778/n01667778_21559.JPEG 3
n01667778/n01667778_21627.JPEG 3
n01667778/n01667778_21628.JPEG 3
n01667778/n01667778_21641.JPEG 3
n01667778/n01667778_21651.JPEG 3
n01667778/n01667778_21657.JPEG 3
n01667778/n01667778_2166.JPEG 3
n01667778/n01667778_21672.JPEG 3
n01667778/n01667778_217.JPEG 3
n01667778/n01667778_2170.JPEG 3
n01667778/n01667778_21710.JPEG 3
n01667778/n01667778_21714.JPEG 3
n01667778/n01667778_21717.JPEG 3
n01667778/n01667778_21772.JPEG 3
n01667778/n01667778_21777.JPEG 3
n01667778/n01667778_2179.JPEG 3
n01667778/n01667778_21836.JPEG 3
n01667778/n01667778_21897.JPEG 3
n01667778/n01667778_21898.JPEG 3
n01667778/n01667778_2194.JPEG 3
n01667778/n01667778_21947.JPEG 3
n01667778/n01667778_2195.JPEG 3
n01667778/n01667778_2202.JPEG 3
n01667778/n01667778_22046.JPEG 3
n01667778/n01667778_22049.JPEG 3
n01667778/n01667778_2205.JPEG 3
n01667778/n01667778_22058.JPEG 3
n01667778/n01667778_2207.JPEG 3
n01667778/n01667778_22118.JPEG 3
n01667778/n01667778_22129.JPEG 3
n01667778/n01667778_22132.JPEG 3
n01667778/n01667778_2220.JPEG 3
n01667778/n01667778_2221.JPEG 3
n01667778/n01667778_22262.JPEG 3
n01667778/n01667778_22282.JPEG 3
n01667778/n01667778_22333.JPEG 3
n01667778/n01667778_22337.JPEG 3
n01667778/n01667778_22356.JPEG 3
n01667778/n01667778_22367.JPEG 3
n01667778/n01667778_22378.JPEG 3
n01667778/n01667778_2244.JPEG 3
n01667778/n01667778_22443.JPEG 3
n01667778/n01667778_22448.JPEG 3
n01667778/n01667778_22464.JPEG 3
n01667778/n01667778_22475.JPEG 3
n01667778/n01667778_2249.JPEG 3
n01667778/n01667778_22500.JPEG 3
n01667778/n01667778_22501.JPEG 3
n01667778/n01667778_22550.JPEG 3
n01667778/n01667778_22552.JPEG 3
n01667778/n01667778_22570.JPEG 3
n01667778/n01667778_2259.JPEG 3
n01667778/n01667778_22618.JPEG 3
n01667778/n01667778_2262.JPEG 3
n01667778/n01667778_22667.JPEG 3
n01667778/n01667778_2267.JPEG 3
n01667778/n01667778_22765.JPEG 3
n01667778/n01667778_22769.JPEG 3
n01667778/n01667778_22788.JPEG 3
n01667778/n01667778_22793.JPEG 3
n01667778/n01667778_22797.JPEG 3
n01667778/n01667778_2280.JPEG 3
n01667778/n01667778_22814.JPEG 3
n01667778/n01667778_22897.JPEG 3
n01667778/n01667778_229.JPEG 3
n01667778/n01667778_22950.JPEG 3
n01667778/n01667778_2297.JPEG 3
n01667778/n01667778_22972.JPEG 3
n01667778/n01667778_23017.JPEG 3
n01667778/n01667778_23027.JPEG 3
n01667778/n01667778_2306.JPEG 3
n01667778/n01667778_23066.JPEG 3
n01667778/n01667778_23168.JPEG 3
n01667778/n01667778_23233.JPEG 3
n01667778/n01667778_2324.JPEG 3
n01667778/n01667778_2325.JPEG 3
n01667778/n01667778_23261.JPEG 3
n01667778/n01667778_23262.JPEG 3
n01667778/n01667778_2327.JPEG 3
n01667778/n01667778_23281.JPEG 3
n01667778/n01667778_23387.JPEG 3
n01667778/n01667778_23417.JPEG 3
n01667778/n01667778_2342.JPEG 3
n01667778/n01667778_23468.JPEG 3
n01667778/n01667778_2347.JPEG 3
n01667778/n01667778_2351.JPEG 3
n01667778/n01667778_23535.JPEG 3
n01667778/n01667778_23548.JPEG 3
n01667778/n01667778_23551.JPEG 3
n01667778/n01667778_23556.JPEG 3
n01667778/n01667778_2357.JPEG 3
n01667778/n01667778_2358.JPEG 3
n01667778/n01667778_23581.JPEG 3
n01667778/n01667778_236.JPEG 3
n01667778/n01667778_2364.JPEG 3
n01667778/n01667778_23669.JPEG 3
n01667778/n01667778_23733.JPEG 3
n01667778/n01667778_2378.JPEG 3
n01667778/n01667778_23791.JPEG 3
n01667778/n01667778_238.JPEG 3
n01667778/n01667778_23816.JPEG 3
n01667778/n01667778_2386.JPEG 3
n01667778/n01667778_23884.JPEG 3
n01667778/n01667778_23954.JPEG 3
n01667778/n01667778_2401.JPEG 3
n01667778/n01667778_2407.JPEG 3
n01667778/n01667778_2430.JPEG 3
n01667778/n01667778_2431.JPEG 3
n01667778/n01667778_2456.JPEG 3
n01667778/n01667778_2460.JPEG 3
n01667778/n01667778_2466.JPEG 3
n01667778/n01667778_2474.JPEG 3
n01667778/n01667778_249.JPEG 3
n01667778/n01667778_2498.JPEG 3
n01667778/n01667778_2506.JPEG 3
n01667778/n01667778_2510.JPEG 3
n01667778/n01667778_255.JPEG 3
n01667778/n01667778_2566.JPEG 3
n01667778/n01667778_2576.JPEG 3
n01667778/n01667778_259.JPEG 3
n01667778/n01667778_2594.JPEG 3
n01667778/n01667778_2596.JPEG 3
n01667778/n01667778_2602.JPEG 3
n01667778/n01667778_2621.JPEG 3
n01667778/n01667778_2636.JPEG 3
n01667778/n01667778_2645.JPEG 3
n01667778/n01667778_2649.JPEG 3
n01667778/n01667778_2651.JPEG 3
n01667778/n01667778_2680.JPEG 3
n01667778/n01667778_2682.JPEG 3
n01667778/n01667778_2696.JPEG 3
n01667778/n01667778_2703.JPEG 3
n01667778/n01667778_2709.JPEG 3
n01667778/n01667778_2712.JPEG 3
n01667778/n01667778_2715.JPEG 3
n01667778/n01667778_2724.JPEG 3
n01667778/n01667778_2735.JPEG 3
n01667778/n01667778_2753.JPEG 3
n01667778/n01667778_2768.JPEG 3
n01667778/n01667778_279.JPEG 3
n01667778/n01667778_28.JPEG 3
n01667778/n01667778_2801.JPEG 3
n01667778/n01667778_2810.JPEG 3
n01667778/n01667778_282.JPEG 3
n01667778/n01667778_2823.JPEG 3
n01667778/n01667778_2828.JPEG 3
n01667778/n01667778_2839.JPEG 3
n01667778/n01667778_2847.JPEG 3
n01667778/n01667778_2858.JPEG 3
n01667778/n01667778_2860.JPEG 3
n01667778/n01667778_2861.JPEG 3
n01667778/n01667778_2862.JPEG 3
n01667778/n01667778_2878.JPEG 3
n01667778/n01667778_2883.JPEG 3
n01667778/n01667778_2896.JPEG 3
n01667778/n01667778_2905.JPEG 3
n01667778/n01667778_2910.JPEG 3
n01667778/n01667778_2911.JPEG 3
n01667778/n01667778_2916.JPEG 3
n01667778/n01667778_2924.JPEG 3
n01667778/n01667778_2944.JPEG 3
n01667778/n01667778_2955.JPEG 3
n01667778/n01667778_2958.JPEG 3
n01667778/n01667778_296.JPEG 3
n01667778/n01667778_3001.JPEG 3
n01667778/n01667778_3004.JPEG 3
n01667778/n01667778_3011.JPEG 3
n01667778/n01667778_3020.JPEG 3
n01667778/n01667778_3044.JPEG 3
n01667778/n01667778_3049.JPEG 3
n01667778/n01667778_307.JPEG 3
n01667778/n01667778_3078.JPEG 3
n01667778/n01667778_308.JPEG 3
n01667778/n01667778_3093.JPEG 3
n01667778/n01667778_3107.JPEG 3
n01667778/n01667778_3145.JPEG 3
n01667778/n01667778_3154.JPEG 3
n01667778/n01667778_3160.JPEG 3
n01667778/n01667778_3176.JPEG 3
n01667778/n01667778_320.JPEG 3
n01667778/n01667778_321.JPEG 3
n01667778/n01667778_3225.JPEG 3
n01667778/n01667778_3233.JPEG 3
n01667778/n01667778_3237.JPEG 3
n01667778/n01667778_3263.JPEG 3
n01667778/n01667778_327.JPEG 3
n01667778/n01667778_3276.JPEG 3
n01667778/n01667778_3283.JPEG 3
n01667778/n01667778_3293.JPEG 3
n01667778/n01667778_3295.JPEG 3
n01667778/n01667778_3341.JPEG 3
n01667778/n01667778_3358.JPEG 3
n01667778/n01667778_3398.JPEG 3
n01667778/n01667778_3399.JPEG 3
n01667778/n01667778_3403.JPEG 3
n01667778/n01667778_3406.JPEG 3
n01667778/n01667778_3407.JPEG 3
n01667778/n01667778_3419.JPEG 3
n01667778/n01667778_3425.JPEG 3
n01667778/n01667778_3451.JPEG 3
n01667778/n01667778_3482.JPEG 3
n01667778/n01667778_3487.JPEG 3
n01667778/n01667778_3499.JPEG 3
n01667778/n01667778_35.JPEG 3
n01667778/n01667778_350.JPEG 3
n01667778/n01667778_3509.JPEG 3
n01667778/n01667778_3513.JPEG 3
n01667778/n01667778_3515.JPEG 3
n01667778/n01667778_3525.JPEG 3
n01667778/n01667778_3526.JPEG 3
n01667778/n01667778_3531.JPEG 3
n01667778/n01667778_3532.JPEG 3
n01667778/n01667778_3538.JPEG 3
n01667778/n01667778_3540.JPEG 3
n01667778/n01667778_3550.JPEG 3
n01667778/n01667778_3557.JPEG 3
n01667778/n01667778_3561.JPEG 3
n01667778/n01667778_3588.JPEG 3
n01667778/n01667778_3592.JPEG 3
n01667778/n01667778_360.JPEG 3
n01667778/n01667778_3609.JPEG 3
n01667778/n01667778_3613.JPEG 3
n01667778/n01667778_3654.JPEG 3
n01667778/n01667778_3663.JPEG 3
n01667778/n01667778_3666.JPEG 3
n01667778/n01667778_3675.JPEG 3
n01667778/n01667778_3694.JPEG 3
n01667778/n01667778_3710.JPEG 3
n01667778/n01667778_3751.JPEG 3
n01667778/n01667778_3766.JPEG 3
n01667778/n01667778_3774.JPEG 3
n01667778/n01667778_3777.JPEG 3
n01667778/n01667778_3791.JPEG 3
n01667778/n01667778_3807.JPEG 3
n01667778/n01667778_3810.JPEG 3
n01667778/n01667778_3816.JPEG 3
n01667778/n01667778_3819.JPEG 3
n01667778/n01667778_3823.JPEG 3
n01667778/n01667778_3856.JPEG 3
n01667778/n01667778_3883.JPEG 3
n01667778/n01667778_39.JPEG 3
n01667778/n01667778_3914.JPEG 3
n01667778/n01667778_3919.JPEG 3
n01667778/n01667778_3920.JPEG 3
n01667778/n01667778_3922.JPEG 3
n01667778/n01667778_393.JPEG 3
n01667778/n01667778_3948.JPEG 3
n01667778/n01667778_3953.JPEG 3
n01667778/n01667778_3958.JPEG 3
n01667778/n01667778_3962.JPEG 3
n01667778/n01667778_3977.JPEG 3
n01667778/n01667778_4.JPEG 3
n01667778/n01667778_4040.JPEG 3
n01667778/n01667778_4068.JPEG 3
n01667778/n01667778_4107.JPEG 3
n01667778/n01667778_4118.JPEG 3
n01667778/n01667778_4119.JPEG 3
n01667778/n01667778_4126.JPEG 3
n01667778/n01667778_4140.JPEG 3
n01667778/n01667778_4141.JPEG 3
n01667778/n01667778_4145.JPEG 3
n01667778/n01667778_415.JPEG 3
n01667778/n01667778_4157.JPEG 3
n01667778/n01667778_4175.JPEG 3
n01667778/n01667778_4194.JPEG 3
n01667778/n01667778_4197.JPEG 3
n01667778/n01667778_4208.JPEG 3
n01667778/n01667778_4210.JPEG 3
n01667778/n01667778_4213.JPEG 3
n01667778/n01667778_4217.JPEG 3
n01667778/n01667778_4230.JPEG 3
n01667778/n01667778_425.JPEG 3
n01667778/n01667778_4252.JPEG 3
n01667778/n01667778_4262.JPEG 3
n01667778/n01667778_4318.JPEG 3
n01667778/n01667778_4319.JPEG 3
n01667778/n01667778_4321.JPEG 3
n01667778/n01667778_4323.JPEG 3
n01667778/n01667778_434.JPEG 3
n01667778/n01667778_435.JPEG 3
n01667778/n01667778_4355.JPEG 3
n01667778/n01667778_4367.JPEG 3
n01667778/n01667778_437.JPEG 3
n01667778/n01667778_4370.JPEG 3
n01667778/n01667778_4442.JPEG 3
n01667778/n01667778_4456.JPEG 3
n01667778/n01667778_4466.JPEG 3
n01667778/n01667778_4491.JPEG 3
n01667778/n01667778_4497.JPEG 3
n01667778/n01667778_4526.JPEG 3
n01667778/n01667778_453.JPEG 3
n01667778/n01667778_4532.JPEG 3
n01667778/n01667778_4534.JPEG 3
n01667778/n01667778_4538.JPEG 3
n01667778/n01667778_4539.JPEG 3
n01667778/n01667778_4550.JPEG 3
n01667778/n01667778_4559.JPEG 3
n01667778/n01667778_4599.JPEG 3
n01667778/n01667778_4610.JPEG 3
n01667778/n01667778_4612.JPEG 3
n01667778/n01667778_4614.JPEG 3
n01667778/n01667778_4620.JPEG 3
n01667778/n01667778_4621.JPEG 3
n01667778/n01667778_464.JPEG 3
n01667778/n01667778_4642.JPEG 3
n01667778/n01667778_4656.JPEG 3
n01667778/n01667778_4665.JPEG 3
n01667778/n01667778_4674.JPEG 3
n01667778/n01667778_47.JPEG 3
n01667778/n01667778_470.JPEG 3
n01667778/n01667778_4721.JPEG 3
n01667778/n01667778_4727.JPEG 3
n01667778/n01667778_473.JPEG 3
n01667778/n01667778_476.JPEG 3
n01667778/n01667778_4767.JPEG 3
n01667778/n01667778_4768.JPEG 3
n01667778/n01667778_4836.JPEG 3
n01667778/n01667778_4839.JPEG 3
n01667778/n01667778_4848.JPEG 3
n01667778/n01667778_4849.JPEG 3
n01667778/n01667778_4864.JPEG 3
n01667778/n01667778_4875.JPEG 3
n01667778/n01667778_4881.JPEG 3
n01667778/n01667778_4883.JPEG 3
n01667778/n01667778_4912.JPEG 3
n01667778/n01667778_4926.JPEG 3
n01667778/n01667778_4936.JPEG 3
n01667778/n01667778_4941.JPEG 3
n01667778/n01667778_4949.JPEG 3
n01667778/n01667778_4954.JPEG 3
n01667778/n01667778_4955.JPEG 3
n01667778/n01667778_4974.JPEG 3
n01667778/n01667778_4990.JPEG 3
n01667778/n01667778_50.JPEG 3
n01667778/n01667778_5001.JPEG 3
n01667778/n01667778_5025.JPEG 3
n01667778/n01667778_5042.JPEG 3
n01667778/n01667778_5044.JPEG 3
n01667778/n01667778_5060.JPEG 3
n01667778/n01667778_5070.JPEG 3
n01667778/n01667778_5082.JPEG 3
n01667778/n01667778_5090.JPEG 3
n01667778/n01667778_5101.JPEG 3
n01667778/n01667778_5103.JPEG 3
n01667778/n01667778_5117.JPEG 3
n01667778/n01667778_5121.JPEG 3
n01667778/n01667778_5124.JPEG 3
n01667778/n01667778_5128.JPEG 3
n01667778/n01667778_5151.JPEG 3
n01667778/n01667778_5152.JPEG 3
n01667778/n01667778_5169.JPEG 3
n01667778/n01667778_517.JPEG 3
n01667778/n01667778_5170.JPEG 3
n01667778/n01667778_5171.JPEG 3
n01667778/n01667778_5178.JPEG 3
n01667778/n01667778_5179.JPEG 3
n01667778/n01667778_5196.JPEG 3
n01667778/n01667778_5198.JPEG 3
n01667778/n01667778_5200.JPEG 3
n01667778/n01667778_5208.JPEG 3
n01667778/n01667778_5209.JPEG 3
n01667778/n01667778_521.JPEG 3
n01667778/n01667778_5210.JPEG 3
n01667778/n01667778_5227.JPEG 3
n01667778/n01667778_524.JPEG 3
n01667778/n01667778_5240.JPEG 3
n01667778/n01667778_5245.JPEG 3
n01667778/n01667778_5251.JPEG 3
n01667778/n01667778_5267.JPEG 3
n01667778/n01667778_5274.JPEG 3
n01667778/n01667778_5285.JPEG 3
n01667778/n01667778_529.JPEG 3
n01667778/n01667778_5292.JPEG 3
n01667778/n01667778_5294.JPEG 3
n01667778/n01667778_5297.JPEG 3
n01667778/n01667778_5322.JPEG 3
n01667778/n01667778_5329.JPEG 3
n01667778/n01667778_5332.JPEG 3
n01667778/n01667778_5342.JPEG 3
n01667778/n01667778_5344.JPEG 3
n01667778/n01667778_5348.JPEG 3
n01667778/n01667778_5358.JPEG 3
n01667778/n01667778_5364.JPEG 3
n01667778/n01667778_5374.JPEG 3
n01667778/n01667778_5385.JPEG 3
n01667778/n01667778_5398.JPEG 3
n01667778/n01667778_5406.JPEG 3
n01667778/n01667778_5413.JPEG 3
n01667778/n01667778_5417.JPEG 3
n01667778/n01667778_5437.JPEG 3
n01667778/n01667778_5445.JPEG 3
n01667778/n01667778_545.JPEG 3
n01667778/n01667778_5455.JPEG 3
n01667778/n01667778_5457.JPEG 3
n01667778/n01667778_5470.JPEG 3
n01667778/n01667778_5474.JPEG 3
n01667778/n01667778_5479.JPEG 3
n01667778/n01667778_5483.JPEG 3
n01667778/n01667778_5486.JPEG 3
n01667778/n01667778_5488.JPEG 3
n01667778/n01667778_549.JPEG 3
n01667778/n01667778_5492.JPEG 3
n01667778/n01667778_5496.JPEG 3
n01667778/n01667778_5506.JPEG 3
n01667778/n01667778_5507.JPEG 3
n01667778/n01667778_5515.JPEG 3
n01667778/n01667778_5526.JPEG 3
n01667778/n01667778_5529.JPEG 3
n01667778/n01667778_5531.JPEG 3
n01667778/n01667778_5532.JPEG 3
n01667778/n01667778_5537.JPEG 3
n01667778/n01667778_5543.JPEG 3
n01667778/n01667778_5551.JPEG 3
n01667778/n01667778_5552.JPEG 3
n01667778/n01667778_5580.JPEG 3
n01667778/n01667778_5588.JPEG 3
n01667778/n01667778_5601.JPEG 3
n01667778/n01667778_5608.JPEG 3
n01667778/n01667778_5609.JPEG 3
n01667778/n01667778_5618.JPEG 3
n01667778/n01667778_5639.JPEG 3
n01667778/n01667778_5641.JPEG 3
n01667778/n01667778_5648.JPEG 3
n01667778/n01667778_565.JPEG 3
n01667778/n01667778_5660.JPEG 3
n01667778/n01667778_5665.JPEG 3
n01667778/n01667778_5679.JPEG 3
n01667778/n01667778_5686.JPEG 3
n01667778/n01667778_5697.JPEG 3
n01667778/n01667778_5713.JPEG 3
n01667778/n01667778_5716.JPEG 3
n01667778/n01667778_5721.JPEG 3
n01667778/n01667778_5730.JPEG 3
n01667778/n01667778_5762.JPEG 3
n01667778/n01667778_5783.JPEG 3
n01667778/n01667778_5787.JPEG 3
n01667778/n01667778_5796.JPEG 3
n01667778/n01667778_5798.JPEG 3
n01667778/n01667778_5803.JPEG 3
n01667778/n01667778_5810.JPEG 3
n01667778/n01667778_5811.JPEG 3
n01667778/n01667778_5816.JPEG 3
n01667778/n01667778_583.JPEG 3
n01667778/n01667778_5834.JPEG 3
n01667778/n01667778_5841.JPEG 3
n01667778/n01667778_5854.JPEG 3
n01667778/n01667778_5875.JPEG 3
n01667778/n01667778_5878.JPEG 3
n01667778/n01667778_588.JPEG 3
n01667778/n01667778_5883.JPEG 3
n01667778/n01667778_5895.JPEG 3
n01667778/n01667778_5896.JPEG 3
n01667778/n01667778_5898.JPEG 3
n01667778/n01667778_5909.JPEG 3
n01667778/n01667778_5922.JPEG 3
n01667778/n01667778_5926.JPEG 3
n01667778/n01667778_5928.JPEG 3
n01667778/n01667778_5940.JPEG 3
n01667778/n01667778_5946.JPEG 3
n01667778/n01667778_5964.JPEG 3
n01667778/n01667778_5976.JPEG 3
n01667778/n01667778_598.JPEG 3
n01667778/n01667778_600.JPEG 3
n01667778/n01667778_6001.JPEG 3
n01667778/n01667778_6017.JPEG 3
n01667778/n01667778_6038.JPEG 3
n01667778/n01667778_6039.JPEG 3
n01667778/n01667778_6040.JPEG 3
n01667778/n01667778_6042.JPEG 3
n01667778/n01667778_6056.JPEG 3
n01667778/n01667778_6057.JPEG 3
n01667778/n01667778_6058.JPEG 3
n01667778/n01667778_6068.JPEG 3
n01667778/n01667778_6070.JPEG 3
n01667778/n01667778_6074.JPEG 3
n01667778/n01667778_6079.JPEG 3
n01667778/n01667778_6095.JPEG 3
n01667778/n01667778_61.JPEG 3
n01667778/n01667778_6103.JPEG 3
n01667778/n01667778_6114.JPEG 3
n01667778/n01667778_6137.JPEG 3
n01667778/n01667778_614.JPEG 3
n01667778/n01667778_6156.JPEG 3
n01667778/n01667778_6159.JPEG 3
n01667778/n01667778_6176.JPEG 3
n01667778/n01667778_6191.JPEG 3
n01667778/n01667778_6193.JPEG 3
n01667778/n01667778_6201.JPEG 3
n01667778/n01667778_6210.JPEG 3
n01667778/n01667778_6216.JPEG 3
n01667778/n01667778_6231.JPEG 3
n01667778/n01667778_6237.JPEG 3
n01667778/n01667778_6244.JPEG 3
n01667778/n01667778_6259.JPEG 3
n01667778/n01667778_6263.JPEG 3
n01667778/n01667778_6269.JPEG 3
n01667778/n01667778_6292.JPEG 3
n01667778/n01667778_632.JPEG 3
n01667778/n01667778_6333.JPEG 3
n01667778/n01667778_6339.JPEG 3
n01667778/n01667778_635.JPEG 3
n01667778/n01667778_6350.JPEG 3
n01667778/n01667778_6351.JPEG 3
n01667778/n01667778_636.JPEG 3
n01667778/n01667778_6363.JPEG 3
n01667778/n01667778_6364.JPEG 3
n01667778/n01667778_6366.JPEG 3
n01667778/n01667778_6368.JPEG 3
n01667778/n01667778_6370.JPEG 3
n01667778/n01667778_6371.JPEG 3
n01667778/n01667778_6374.JPEG 3
n01667778/n01667778_6382.JPEG 3
n01667778/n01667778_6390.JPEG 3
n01667778/n01667778_6398.JPEG 3
n01667778/n01667778_64.JPEG 3
n01667778/n01667778_6405.JPEG 3
n01667778/n01667778_6411.JPEG 3
n01667778/n01667778_6416.JPEG 3
n01667778/n01667778_6436.JPEG 3
n01667778/n01667778_6441.JPEG 3
n01667778/n01667778_6453.JPEG 3
n01667778/n01667778_6459.JPEG 3
n01667778/n01667778_6461.JPEG 3
n01667778/n01667778_6463.JPEG 3
n01667778/n01667778_6468.JPEG 3
n01667778/n01667778_6471.JPEG 3
n01667778/n01667778_6478.JPEG 3
n01667778/n01667778_6494.JPEG 3
n01667778/n01667778_6496.JPEG 3
n01667778/n01667778_6498.JPEG 3
n01667778/n01667778_6527.JPEG 3
n01667778/n01667778_6531.JPEG 3
n01667778/n01667778_6533.JPEG 3
n01667778/n01667778_6538.JPEG 3
n01667778/n01667778_654.JPEG 3
n01667778/n01667778_6547.JPEG 3
n01667778/n01667778_6552.JPEG 3
n01667778/n01667778_6561.JPEG 3
n01667778/n01667778_6580.JPEG 3
n01667778/n01667778_6587.JPEG 3
n01667778/n01667778_6595.JPEG 3
n01667778/n01667778_6596.JPEG 3
n01667778/n01667778_6613.JPEG 3
n01667778/n01667778_6617.JPEG 3
n01667778/n01667778_6626.JPEG 3
n01667778/n01667778_6639.JPEG 3
n01667778/n01667778_6649.JPEG 3
n01667778/n01667778_6655.JPEG 3
n01667778/n01667778_6656.JPEG 3
n01667778/n01667778_666.JPEG 3
n01667778/n01667778_6671.JPEG 3
n01667778/n01667778_6696.JPEG 3
n01667778/n01667778_6700.JPEG 3
n01667778/n01667778_6703.JPEG 3
n01667778/n01667778_673.JPEG 3
n01667778/n01667778_6739.JPEG 3
n01667778/n01667778_6744.JPEG 3
n01667778/n01667778_6748.JPEG 3
n01667778/n01667778_6768.JPEG 3
n01667778/n01667778_6783.JPEG 3
n01667778/n01667778_6788.JPEG 3
n01667778/n01667778_68.JPEG 3
n01667778/n01667778_6809.JPEG 3
n01667778/n01667778_6811.JPEG 3
n01667778/n01667778_6819.JPEG 3
n01667778/n01667778_682.JPEG 3
n01667778/n01667778_6836.JPEG 3
n01667778/n01667778_6840.JPEG 3
n01667778/n01667778_686.JPEG 3
n01667778/n01667778_6860.JPEG 3
n01667778/n01667778_6861.JPEG 3
n01667778/n01667778_6876.JPEG 3
n01667778/n01667778_6877.JPEG 3
n01667778/n01667778_688.JPEG 3
n01667778/n01667778_6893.JPEG 3
n01667778/n01667778_6899.JPEG 3
n01667778/n01667778_6924.JPEG 3
n01667778/n01667778_6926.JPEG 3
n01667778/n01667778_6927.JPEG 3
n01667778/n01667778_6940.JPEG 3
n01667778/n01667778_6942.JPEG 3
n01667778/n01667778_6977.JPEG 3
n01667778/n01667778_6978.JPEG 3
n01667778/n01667778_698.JPEG 3
n01667778/n01667778_6981.JPEG 3
n01667778/n01667778_7006.JPEG 3
n01667778/n01667778_7008.JPEG 3
n01667778/n01667778_7013.JPEG 3
n01667778/n01667778_702.JPEG 3
n01667778/n01667778_7025.JPEG 3
n01667778/n01667778_7042.JPEG 3
n01667778/n01667778_7068.JPEG 3
n01667778/n01667778_709.JPEG 3
n01667778/n01667778_7100.JPEG 3
n01667778/n01667778_7110.JPEG 3
n01667778/n01667778_712.JPEG 3
n01667778/n01667778_7120.JPEG 3
n01667778/n01667778_7133.JPEG 3
n01667778/n01667778_7145.JPEG 3
n01667778/n01667778_715.JPEG 3
n01667778/n01667778_7164.JPEG 3
n01667778/n01667778_7166.JPEG 3
n01667778/n01667778_7177.JPEG 3
n01667778/n01667778_718.JPEG 3
n01667778/n01667778_7184.JPEG 3
n01667778/n01667778_7190.JPEG 3
n01667778/n01667778_7229.JPEG 3
n01667778/n01667778_723.JPEG 3
n01667778/n01667778_7235.JPEG 3
n01667778/n01667778_7283.JPEG 3
n01667778/n01667778_7301.JPEG 3
n01667778/n01667778_731.JPEG 3
n01667778/n01667778_7310.JPEG 3
n01667778/n01667778_7318.JPEG 3
n01667778/n01667778_7327.JPEG 3
n01667778/n01667778_733.JPEG 3
n01667778/n01667778_7357.JPEG 3
n01667778/n01667778_7360.JPEG 3
n01667778/n01667778_7363.JPEG 3
n01667778/n01667778_7366.JPEG 3
n01667778/n01667778_7369.JPEG 3
n01667778/n01667778_7376.JPEG 3
n01667778/n01667778_7400.JPEG 3
n01667778/n01667778_7415.JPEG 3
n01667778/n01667778_7417.JPEG 3
n01667778/n01667778_7439.JPEG 3
n01667778/n01667778_7459.JPEG 3
n01667778/n01667778_7460.JPEG 3
n01667778/n01667778_7471.JPEG 3
n01667778/n01667778_7485.JPEG 3
n01667778/n01667778_7487.JPEG 3
n01667778/n01667778_7510.JPEG 3
n01667778/n01667778_7528.JPEG 3
n01667778/n01667778_7536.JPEG 3
n01667778/n01667778_7569.JPEG 3
n01667778/n01667778_7574.JPEG 3
n01667778/n01667778_7608.JPEG 3
n01667778/n01667778_761.JPEG 3
n01667778/n01667778_7631.JPEG 3
n01667778/n01667778_7638.JPEG 3
n01667778/n01667778_7641.JPEG 3
n01667778/n01667778_7649.JPEG 3
n01667778/n01667778_7664.JPEG 3
n01667778/n01667778_7675.JPEG 3
n01667778/n01667778_7679.JPEG 3
n01667778/n01667778_7697.JPEG 3
n01667778/n01667778_7699.JPEG 3
n01667778/n01667778_770.JPEG 3
n01667778/n01667778_7702.JPEG 3
n01667778/n01667778_772.JPEG 3
n01667778/n01667778_7731.JPEG 3
n01667778/n01667778_7736.JPEG 3
n01667778/n01667778_7739.JPEG 3
n01667778/n01667778_7741.JPEG 3
n01667778/n01667778_7786.JPEG 3
n01667778/n01667778_7807.JPEG 3
n01667778/n01667778_7843.JPEG 3
n01667778/n01667778_7844.JPEG 3
n01667778/n01667778_7845.JPEG 3
n01667778/n01667778_7847.JPEG 3
n01667778/n01667778_7850.JPEG 3
n01667778/n01667778_7853.JPEG 3
n01667778/n01667778_7864.JPEG 3
n01667778/n01667778_7883.JPEG 3
n01667778/n01667778_7889.JPEG 3
n01667778/n01667778_7895.JPEG 3
n01667778/n01667778_7900.JPEG 3
n01667778/n01667778_7903.JPEG 3
n01667778/n01667778_7931.JPEG 3
n01667778/n01667778_7969.JPEG 3
n01667778/n01667778_7979.JPEG 3
n01667778/n01667778_8009.JPEG 3
n01667778/n01667778_803.JPEG 3
n01667778/n01667778_8039.JPEG 3
n01667778/n01667778_8042.JPEG 3
n01667778/n01667778_8047.JPEG 3
n01667778/n01667778_8124.JPEG 3
n01667778/n01667778_8178.JPEG 3
n01667778/n01667778_8209.JPEG 3
n01667778/n01667778_8214.JPEG 3
n01667778/n01667778_8222.JPEG 3
n01667778/n01667778_8226.JPEG 3
n01667778/n01667778_8230.JPEG 3
n01667778/n01667778_8241.JPEG 3
n01667778/n01667778_825.JPEG 3
n01667778/n01667778_8267.JPEG 3
n01667778/n01667778_827.JPEG 3
n01667778/n01667778_8276.JPEG 3
n01667778/n01667778_8287.JPEG 3
n01667778/n01667778_8289.JPEG 3
n01667778/n01667778_8311.JPEG 3
n01667778/n01667778_8315.JPEG 3
n01667778/n01667778_8330.JPEG 3
n01667778/n01667778_8347.JPEG 3
n01667778/n01667778_8355.JPEG 3
n01667778/n01667778_8371.JPEG 3
n01667778/n01667778_8375.JPEG 3
n01667778/n01667778_8386.JPEG 3
n01667778/n01667778_8398.JPEG 3
n01667778/n01667778_840.JPEG 3
n01667778/n01667778_8408.JPEG 3
n01667778/n01667778_8410.JPEG 3
n01667778/n01667778_8415.JPEG 3
n01667778/n01667778_8429.JPEG 3
n01667778/n01667778_843.JPEG 3
n01667778/n01667778_8433.JPEG 3
n01667778/n01667778_8442.JPEG 3
n01667778/n01667778_8460.JPEG 3
n01667778/n01667778_8480.JPEG 3
n01667778/n01667778_8484.JPEG 3
n01667778/n01667778_8489.JPEG 3
n01667778/n01667778_8492.JPEG 3
n01667778/n01667778_8496.JPEG 3
n01667778/n01667778_8527.JPEG 3
n01667778/n01667778_8528.JPEG 3
n01667778/n01667778_8531.JPEG 3
n01667778/n01667778_8537.JPEG 3
n01667778/n01667778_8538.JPEG 3
n01667778/n01667778_8539.JPEG 3
n01667778/n01667778_8556.JPEG 3
n01667778/n01667778_8595.JPEG 3
n01667778/n01667778_8601.JPEG 3
n01667778/n01667778_8604.JPEG 3
n01667778/n01667778_8612.JPEG 3
n01667778/n01667778_8623.JPEG 3
n01667778/n01667778_8631.JPEG 3
n01667778/n01667778_8642.JPEG 3
n01667778/n01667778_8650.JPEG 3
n01667778/n01667778_8663.JPEG 3
n01667778/n01667778_8667.JPEG 3
n01667778/n01667778_8689.JPEG 3
n01667778/n01667778_8701.JPEG 3
n01667778/n01667778_8713.JPEG 3
n01667778/n01667778_8737.JPEG 3
n01667778/n01667778_8742.JPEG 3
n01667778/n01667778_8745.JPEG 3
n01667778/n01667778_8765.JPEG 3
n01667778/n01667778_8793.JPEG 3
n01667778/n01667778_8794.JPEG 3
n01667778/n01667778_8815.JPEG 3
n01667778/n01667778_8819.JPEG 3
n01667778/n01667778_8832.JPEG 3
n01667778/n01667778_8837.JPEG 3
n01667778/n01667778_884.JPEG 3
n01667778/n01667778_8845.JPEG 3
n01667778/n01667778_8857.JPEG 3
n01667778/n01667778_8875.JPEG 3
n01667778/n01667778_8881.JPEG 3
n01667778/n01667778_8902.JPEG 3
n01667778/n01667778_8903.JPEG 3
n01667778/n01667778_8907.JPEG 3
n01667778/n01667778_8918.JPEG 3
n01667778/n01667778_892.JPEG 3
n01667778/n01667778_8923.JPEG 3
n01667778/n01667778_8931.JPEG 3
n01667778/n01667778_8940.JPEG 3
n01667778/n01667778_8963.JPEG 3
n01667778/n01667778_8976.JPEG 3
n01667778/n01667778_8977.JPEG 3
n01667778/n01667778_8996.JPEG 3
n01667778/n01667778_9002.JPEG 3
n01667778/n01667778_9003.JPEG 3
n01667778/n01667778_9004.JPEG 3
n01667778/n01667778_9019.JPEG 3
n01667778/n01667778_9043.JPEG 3
n01667778/n01667778_9058.JPEG 3
n01667778/n01667778_9079.JPEG 3
n01667778/n01667778_909.JPEG 3
n01667778/n01667778_9099.JPEG 3
n01667778/n01667778_9110.JPEG 3
n01667778/n01667778_9111.JPEG 3
n01667778/n01667778_914.JPEG 3
n01667778/n01667778_9140.JPEG 3
n01667778/n01667778_9146.JPEG 3
n01667778/n01667778_9147.JPEG 3
n01667778/n01667778_9155.JPEG 3
n01667778/n01667778_9159.JPEG 3
n01667778/n01667778_9188.JPEG 3
n01667778/n01667778_919.JPEG 3
n01667778/n01667778_9191.JPEG 3
n01667778/n01667778_9208.JPEG 3
n01667778/n01667778_9225.JPEG 3
n01667778/n01667778_9234.JPEG 3
n01667778/n01667778_9256.JPEG 3
n01667778/n01667778_9259.JPEG 3
n01667778/n01667778_9268.JPEG 3
n01667778/n01667778_928.JPEG 3
n01667778/n01667778_9296.JPEG 3
n01667778/n01667778_9305.JPEG 3
n01667778/n01667778_9320.JPEG 3
n01667778/n01667778_9327.JPEG 3
n01667778/n01667778_9342.JPEG 3
n01667778/n01667778_9346.JPEG 3
n01667778/n01667778_9359.JPEG 3
n01667778/n01667778_9375.JPEG 3
n01667778/n01667778_9377.JPEG 3
n01667778/n01667778_9380.JPEG 3
n01667778/n01667778_9402.JPEG 3
n01667778/n01667778_9415.JPEG 3
n01667778/n01667778_9416.JPEG 3
n01667778/n01667778_9424.JPEG 3
n01667778/n01667778_944.JPEG 3
n01667778/n01667778_9446.JPEG 3
n01667778/n01667778_9451.JPEG 3
n01667778/n01667778_9454.JPEG 3
n01667778/n01667778_9466.JPEG 3
n01667778/n01667778_9478.JPEG 3
n01667778/n01667778_9491.JPEG 3
n01667778/n01667778_9504.JPEG 3
n01667778/n01667778_9536.JPEG 3
n01667778/n01667778_9639.JPEG 3
n01667778/n01667778_9649.JPEG 3
n01667778/n01667778_9718.JPEG 3
n01667778/n01667778_9725.JPEG 3
n01667778/n01667778_9736.JPEG 3
n01667778/n01667778_974.JPEG 3
n01667778/n01667778_9745.JPEG 3
n01667778/n01667778_9788.JPEG 3
n01667778/n01667778_980.JPEG 3
n01667778/n01667778_9815.JPEG 3
n01667778/n01667778_984.JPEG 3
n01667778/n01667778_9842.JPEG 3
n01667778/n01667778_9853.JPEG 3
n01667778/n01667778_9855.JPEG 3
n01667778/n01667778_9868.JPEG 3
n01667778/n01667778_988.JPEG 3
n01667778/n01667778_9912.JPEG 3
n01667778/n01667778_9956.JPEG 3
n01667778/n01667778_9964.JPEG 3
n01667778/n01667778_9985.JPEG 3
n01669191/n01669191_10.JPEG 3
n01669191/n01669191_1000.JPEG 3
n01669191/n01669191_10003.JPEG 3
n01669191/n01669191_10006.JPEG 3
n01669191/n01669191_10009.JPEG 3
n01669191/n01669191_10012.JPEG 3
n01669191/n01669191_10039.JPEG 3
n01669191/n01669191_10045.JPEG 3
n01669191/n01669191_10046.JPEG 3
n01669191/n01669191_10049.JPEG 3
n01669191/n01669191_10053.JPEG 3
n01669191/n01669191_10058.JPEG 3
n01669191/n01669191_10061.JPEG 3
n01669191/n01669191_10067.JPEG 3
n01669191/n01669191_10074.JPEG 3
n01669191/n01669191_10075.JPEG 3
n01669191/n01669191_10076.JPEG 3
n01669191/n01669191_10094.JPEG 3
n01669191/n01669191_1011.JPEG 3
n01669191/n01669191_10113.JPEG 3
n01669191/n01669191_10116.JPEG 3
n01669191/n01669191_10120.JPEG 3
n01669191/n01669191_10125.JPEG 3
n01669191/n01669191_10137.JPEG 3
n01669191/n01669191_1014.JPEG 3
n01669191/n01669191_10141.JPEG 3
n01669191/n01669191_10142.JPEG 3
n01669191/n01669191_10148.JPEG 3
n01669191/n01669191_10151.JPEG 3
n01669191/n01669191_10154.JPEG 3
n01669191/n01669191_10157.JPEG 3
n01669191/n01669191_10174.JPEG 3
n01669191/n01669191_1021.JPEG 3
n01669191/n01669191_10240.JPEG 3
n01669191/n01669191_10243.JPEG 3
n01669191/n01669191_1026.JPEG 3
n01669191/n01669191_10285.JPEG 3
n01669191/n01669191_10294.JPEG 3
n01669191/n01669191_103.JPEG 3
n01669191/n01669191_1031.JPEG 3
n01669191/n01669191_10331.JPEG 3
n01669191/n01669191_10346.JPEG 3
n01669191/n01669191_1035.JPEG 3
n01669191/n01669191_10361.JPEG 3
n01669191/n01669191_10378.JPEG 3
n01669191/n01669191_1038.JPEG 3
n01669191/n01669191_10397.JPEG 3
n01669191/n01669191_10406.JPEG 3
n01669191/n01669191_10413.JPEG 3
n01669191/n01669191_10417.JPEG 3
n01669191/n01669191_10420.JPEG 3
n01669191/n01669191_1047.JPEG 3
n01669191/n01669191_10474.JPEG 3
n01669191/n01669191_10478.JPEG 3
n01669191/n01669191_105.JPEG 3
n01669191/n01669191_10529.JPEG 3
n01669191/n01669191_10534.JPEG 3
n01669191/n01669191_10548.JPEG 3
n01669191/n01669191_10561.JPEG 3
n01669191/n01669191_10577.JPEG 3
n01669191/n01669191_10578.JPEG 3
n01669191/n01669191_10615.JPEG 3
n01669191/n01669191_10623.JPEG 3
n01669191/n01669191_10698.JPEG 3
n01669191/n01669191_10703.JPEG 3
n01669191/n01669191_1071.JPEG 3
n01669191/n01669191_1072.JPEG 3
n01669191/n01669191_1075.JPEG 3
n01669191/n01669191_10755.JPEG 3
n01669191/n01669191_10770.JPEG 3
n01669191/n01669191_10808.JPEG 3
n01669191/n01669191_10814.JPEG 3
n01669191/n01669191_10835.JPEG 3
n01669191/n01669191_10847.JPEG 3
n01669191/n01669191_10867.JPEG 3
n01669191/n01669191_1087.JPEG 3
n01669191/n01669191_1088.JPEG 3
n01669191/n01669191_10897.JPEG 3
n01669191/n01669191_1090.JPEG 3
n01669191/n01669191_10905.JPEG 3
n01669191/n01669191_10908.JPEG 3
n01669191/n01669191_10922.JPEG 3
n01669191/n01669191_1095.JPEG 3
n01669191/n01669191_10959.JPEG 3
n01669191/n01669191_11009.JPEG 3
n01669191/n01669191_1102.JPEG 3
n01669191/n01669191_11029.JPEG 3
n01669191/n01669191_11040.JPEG 3
n01669191/n01669191_11051.JPEG 3
n01669191/n01669191_11083.JPEG 3
n01669191/n01669191_11092.JPEG 3
n01669191/n01669191_111.JPEG 3
n01669191/n01669191_11112.JPEG 3
n01669191/n01669191_11116.JPEG 3
n01669191/n01669191_11138.JPEG 3
n01669191/n01669191_11146.JPEG 3
n01669191/n01669191_11165.JPEG 3
n01669191/n01669191_11172.JPEG 3
n01669191/n01669191_11188.JPEG 3
n01669191/n01669191_11200.JPEG 3
n01669191/n01669191_11202.JPEG 3
n01669191/n01669191_11208.JPEG 3
n01669191/n01669191_11214.JPEG 3
n01669191/n01669191_11217.JPEG 3
n01669191/n01669191_11222.JPEG 3
n01669191/n01669191_1124.JPEG 3
n01669191/n01669191_11248.JPEG 3
n01669191/n01669191_11259.JPEG 3
n01669191/n01669191_11262.JPEG 3
n01669191/n01669191_11264.JPEG 3
n01669191/n01669191_11283.JPEG 3
n01669191/n01669191_11288.JPEG 3
n01669191/n01669191_11294.JPEG 3
n01669191/n01669191_11313.JPEG 3
n01669191/n01669191_11319.JPEG 3
n01669191/n01669191_11325.JPEG 3
n01669191/n01669191_11351.JPEG 3
n01669191/n01669191_1137.JPEG 3
n01669191/n01669191_11372.JPEG 3
n01669191/n01669191_11376.JPEG 3
n01669191/n01669191_11404.JPEG 3
n01669191/n01669191_11411.JPEG 3
n01669191/n01669191_11429.JPEG 3
n01669191/n01669191_1147.JPEG 3
n01669191/n01669191_11496.JPEG 3
n01669191/n01669191_11510.JPEG 3
n01669191/n01669191_1152.JPEG 3
n01669191/n01669191_11521.JPEG 3
n01669191/n01669191_11526.JPEG 3
n01669191/n01669191_11535.JPEG 3
n01669191/n01669191_11584.JPEG 3
n01669191/n01669191_1161.JPEG 3
n01669191/n01669191_11621.JPEG 3
n01669191/n01669191_1165.JPEG 3
n01669191/n01669191_11669.JPEG 3
n01669191/n01669191_11683.JPEG 3
n01669191/n01669191_11713.JPEG 3
n01669191/n01669191_11724.JPEG 3
n01669191/n01669191_11782.JPEG 3
n01669191/n01669191_11788.JPEG 3
n01669191/n01669191_11798.JPEG 3
n01669191/n01669191_11829.JPEG 3
n01669191/n01669191_11846.JPEG 3
n01669191/n01669191_11893.JPEG 3
n01669191/n01669191_11939.JPEG 3
n01669191/n01669191_12016.JPEG 3
n01669191/n01669191_1203.JPEG 3
n01669191/n01669191_12094.JPEG 3
n01669191/n01669191_12119.JPEG 3
n01669191/n01669191_12145.JPEG 3
n01669191/n01669191_12172.JPEG 3
n01669191/n01669191_12186.JPEG 3
n01669191/n01669191_1222.JPEG 3
n01669191/n01669191_12245.JPEG 3
n01669191/n01669191_12250.JPEG 3
n01669191/n01669191_12252.JPEG 3
n01669191/n01669191_12267.JPEG 3
n01669191/n01669191_12272.JPEG 3
n01669191/n01669191_12282.JPEG 3
n01669191/n01669191_12283.JPEG 3
n01669191/n01669191_12285.JPEG 3
n01669191/n01669191_123.JPEG 3
n01669191/n01669191_1233.JPEG 3
n01669191/n01669191_12340.JPEG 3
n01669191/n01669191_12385.JPEG 3
n01669191/n01669191_12389.JPEG 3
n01669191/n01669191_1239.JPEG 3
n01669191/n01669191_12398.JPEG 3
n01669191/n01669191_12399.JPEG 3
n01669191/n01669191_12402.JPEG 3
n01669191/n01669191_12528.JPEG 3
n01669191/n01669191_12566.JPEG 3
n01669191/n01669191_12567.JPEG 3
n01669191/n01669191_12581.JPEG 3
n01669191/n01669191_1263.JPEG 3
n01669191/n01669191_12631.JPEG 3
n01669191/n01669191_12635.JPEG 3
n01669191/n01669191_12663.JPEG 3
n01669191/n01669191_12666.JPEG 3
n01669191/n01669191_12677.JPEG 3
n01669191/n01669191_12688.JPEG 3
n01669191/n01669191_12693.JPEG 3
n01669191/n01669191_12699.JPEG 3
n01669191/n01669191_12708.JPEG 3
n01669191/n01669191_1271.JPEG 3
n01669191/n01669191_12713.JPEG 3
n01669191/n01669191_12733.JPEG 3
n01669191/n01669191_12735.JPEG 3
n01669191/n01669191_12770.JPEG 3
n01669191/n01669191_12776.JPEG 3
n01669191/n01669191_12788.JPEG 3
n01669191/n01669191_1281.JPEG 3
n01669191/n01669191_12827.JPEG 3
n01669191/n01669191_12863.JPEG 3
n01669191/n01669191_12868.JPEG 3
n01669191/n01669191_1290.JPEG 3
n01669191/n01669191_12901.JPEG 3
n01669191/n01669191_12910.JPEG 3
n01669191/n01669191_12923.JPEG 3
n01669191/n01669191_12925.JPEG 3
n01669191/n01669191_12926.JPEG 3
n01669191/n01669191_1294.JPEG 3
n01669191/n01669191_12985.JPEG 3
n01669191/n01669191_12990.JPEG 3
n01669191/n01669191_13.JPEG 3
n01669191/n01669191_13042.JPEG 3
n01669191/n01669191_13052.JPEG 3
n01669191/n01669191_13069.JPEG 3
n01669191/n01669191_13071.JPEG 3
n01669191/n01669191_13085.JPEG 3
n01669191/n01669191_13094.JPEG 3
n01669191/n01669191_13119.JPEG 3
n01669191/n01669191_13120.JPEG 3
n01669191/n01669191_13124.JPEG 3
n01669191/n01669191_13160.JPEG 3
n01669191/n01669191_1317.JPEG 3
n01669191/n01669191_13171.JPEG 3
n01669191/n01669191_13261.JPEG 3
n01669191/n01669191_1328.JPEG 3
n01669191/n01669191_133.JPEG 3
n01669191/n01669191_1331.JPEG 3
n01669191/n01669191_1332.JPEG 3
n01669191/n01669191_1339.JPEG 3
n01669191/n01669191_1343.JPEG 3
n01669191/n01669191_13547.JPEG 3
n01669191/n01669191_13580.JPEG 3
n01669191/n01669191_13630.JPEG 3
n01669191/n01669191_1365.JPEG 3
n01669191/n01669191_13728.JPEG 3
n01669191/n01669191_1377.JPEG 3
n01669191/n01669191_13828.JPEG 3
n01669191/n01669191_13842.JPEG 3
n01669191/n01669191_13860.JPEG 3
n01669191/n01669191_1391.JPEG 3
n01669191/n01669191_1401.JPEG 3
n01669191/n01669191_14025.JPEG 3
n01669191/n01669191_14033.JPEG 3
n01669191/n01669191_14071.JPEG 3
n01669191/n01669191_1418.JPEG 3
n01669191/n01669191_14216.JPEG 3
n01669191/n01669191_1425.JPEG 3
n01669191/n01669191_14254.JPEG 3
n01669191/n01669191_1426.JPEG 3
n01669191/n01669191_1428.JPEG 3
n01669191/n01669191_1429.JPEG 3
n01669191/n01669191_1434.JPEG 3
n01669191/n01669191_1441.JPEG 3
n01669191/n01669191_14566.JPEG 3
n01669191/n01669191_1457.JPEG 3
n01669191/n01669191_14594.JPEG 3
n01669191/n01669191_146.JPEG 3
n01669191/n01669191_1461.JPEG 3
n01669191/n01669191_1462.JPEG 3
n01669191/n01669191_1478.JPEG 3
n01669191/n01669191_14874.JPEG 3
n01669191/n01669191_1490.JPEG 3
n01669191/n01669191_1492.JPEG 3
n01669191/n01669191_1502.JPEG 3
n01669191/n01669191_1509.JPEG 3
n01669191/n01669191_1522.JPEG 3
n01669191/n01669191_154.JPEG 3
n01669191/n01669191_15447.JPEG 3
n01669191/n01669191_1546.JPEG 3
n01669191/n01669191_1555.JPEG 3
n01669191/n01669191_15631.JPEG 3
n01669191/n01669191_1590.JPEG 3
n01669191/n01669191_1595.JPEG 3
n01669191/n01669191_161.JPEG 3
n01669191/n01669191_1626.JPEG 3
n01669191/n01669191_1628.JPEG 3
n01669191/n01669191_1642.JPEG 3
n01669191/n01669191_1653.JPEG 3
n01669191/n01669191_1656.JPEG 3
n01669191/n01669191_1661.JPEG 3
n01669191/n01669191_1672.JPEG 3
n01669191/n01669191_1678.JPEG 3
n01669191/n01669191_1693.JPEG 3
n01669191/n01669191_1697.JPEG 3
n01669191/n01669191_17020.JPEG 3
n01669191/n01669191_17028.JPEG 3
n01669191/n01669191_17064.JPEG 3
n01669191/n01669191_17089.JPEG 3
n01669191/n01669191_17090.JPEG 3
n01669191/n01669191_17100.JPEG 3
n01669191/n01669191_17125.JPEG 3
n01669191/n01669191_1717.JPEG 3
n01669191/n01669191_17196.JPEG 3
n01669191/n01669191_17218.JPEG 3
n01669191/n01669191_17247.JPEG 3
n01669191/n01669191_17282.JPEG 3
n01669191/n01669191_17296.JPEG 3
n01669191/n01669191_17301.JPEG 3
n01669191/n01669191_17320.JPEG 3
n01669191/n01669191_17338.JPEG 3
n01669191/n01669191_17360.JPEG 3
n01669191/n01669191_17361.JPEG 3
n01669191/n01669191_17363.JPEG 3
n01669191/n01669191_17379.JPEG 3
n01669191/n01669191_17382.JPEG 3
n01669191/n01669191_1741.JPEG 3
n01669191/n01669191_1744.JPEG 3
n01669191/n01669191_17464.JPEG 3
n01669191/n01669191_17478.JPEG 3
n01669191/n01669191_17488.JPEG 3
n01669191/n01669191_1750.JPEG 3
n01669191/n01669191_17505.JPEG 3
n01669191/n01669191_17545.JPEG 3
n01669191/n01669191_17551.JPEG 3
n01669191/n01669191_17554.JPEG 3
n01669191/n01669191_17565.JPEG 3
n01669191/n01669191_17570.JPEG 3
n01669191/n01669191_176.JPEG 3
n01669191/n01669191_17600.JPEG 3
n01669191/n01669191_17641.JPEG 3
n01669191/n01669191_17642.JPEG 3
n01669191/n01669191_17654.JPEG 3
n01669191/n01669191_17656.JPEG 3
n01669191/n01669191_17689.JPEG 3
n01669191/n01669191_1769.JPEG 3
n01669191/n01669191_17733.JPEG 3
n01669191/n01669191_17734.JPEG 3
n01669191/n01669191_17738.JPEG 3
n01669191/n01669191_17743.JPEG 3
n01669191/n01669191_17799.JPEG 3
n01669191/n01669191_17810.JPEG 3
n01669191/n01669191_17826.JPEG 3
n01669191/n01669191_17835.JPEG 3
n01669191/n01669191_17850.JPEG 3
n01669191/n01669191_1788.JPEG 3
n01669191/n01669191_17886.JPEG 3
n01669191/n01669191_17893.JPEG 3
n01669191/n01669191_1794.JPEG 3
n01669191/n01669191_17978.JPEG 3
n01669191/n01669191_17987.JPEG 3
n01669191/n01669191_17990.JPEG 3
n01669191/n01669191_18.JPEG 3
n01669191/n01669191_18018.JPEG 3
n01669191/n01669191_1802.JPEG 3
n01669191/n01669191_18022.JPEG 3
n01669191/n01669191_18089.JPEG 3
n01669191/n01669191_18092.JPEG 3
n01669191/n01669191_18102.JPEG 3
n01669191/n01669191_18109.JPEG 3
n01669191/n01669191_18112.JPEG 3
n01669191/n01669191_18139.JPEG 3
n01669191/n01669191_18156.JPEG 3
n01669191/n01669191_18174.JPEG 3
n01669191/n01669191_18215.JPEG 3
n01669191/n01669191_18228.JPEG 3
n01669191/n01669191_18270.JPEG 3
n01669191/n01669191_18286.JPEG 3
n01669191/n01669191_18294.JPEG 3
n01669191/n01669191_18295.JPEG 3
n01669191/n01669191_18298.JPEG 3
n01669191/n01669191_18308.JPEG 3
n01669191/n01669191_18374.JPEG 3
n01669191/n01669191_18381.JPEG 3
n01669191/n01669191_18392.JPEG 3
n01669191/n01669191_18393.JPEG 3
n01669191/n01669191_18395.JPEG 3
n01669191/n01669191_1850.JPEG 3
n01669191/n01669191_188.JPEG 3
n01669191/n01669191_1907.JPEG 3
n01669191/n01669191_191.JPEG 3
n01669191/n01669191_1916.JPEG 3
n01669191/n01669191_1925.JPEG 3
n01669191/n01669191_1930.JPEG 3
n01669191/n01669191_1943.JPEG 3
n01669191/n01669191_1952.JPEG 3
n01669191/n01669191_1965.JPEG 3
n01669191/n01669191_1968.JPEG 3
n01669191/n01669191_1970.JPEG 3
n01669191/n01669191_1974.JPEG 3
n01669191/n01669191_1979.JPEG 3
n01669191/n01669191_1986.JPEG 3
n01669191/n01669191_1991.JPEG 3
n01669191/n01669191_1995.JPEG 3
n01669191/n01669191_2010.JPEG 3
n01669191/n01669191_2016.JPEG 3
n01669191/n01669191_2040.JPEG 3
n01669191/n01669191_2049.JPEG 3
n01669191/n01669191_2084.JPEG 3
n01669191/n01669191_2094.JPEG 3
n01669191/n01669191_2115.JPEG 3
n01669191/n01669191_2117.JPEG 3
n01669191/n01669191_2133.JPEG 3
n01669191/n01669191_2139.JPEG 3
n01669191/n01669191_2140.JPEG 3
n01669191/n01669191_2148.JPEG 3
n01669191/n01669191_2149.JPEG 3
n01669191/n01669191_2170.JPEG 3
n01669191/n01669191_2173.JPEG 3
n01669191/n01669191_2182.JPEG 3
n01669191/n01669191_2202.JPEG 3
n01669191/n01669191_2214.JPEG 3
n01669191/n01669191_2218.JPEG 3
n01669191/n01669191_2237.JPEG 3
n01669191/n01669191_2239.JPEG 3
n01669191/n01669191_2246.JPEG 3
n01669191/n01669191_2250.JPEG 3
n01669191/n01669191_2252.JPEG 3
n01669191/n01669191_2256.JPEG 3
n01669191/n01669191_2258.JPEG 3
n01669191/n01669191_2268.JPEG 3
n01669191/n01669191_2278.JPEG 3
n01669191/n01669191_229.JPEG 3
n01669191/n01669191_2296.JPEG 3
n01669191/n01669191_2301.JPEG 3
n01669191/n01669191_2308.JPEG 3
n01669191/n01669191_2315.JPEG 3
n01669191/n01669191_2319.JPEG 3
n01669191/n01669191_2320.JPEG 3
n01669191/n01669191_2332.JPEG 3
n01669191/n01669191_2333.JPEG 3
n01669191/n01669191_2337.JPEG 3
n01669191/n01669191_2339.JPEG 3
n01669191/n01669191_2346.JPEG 3
n01669191/n01669191_235.JPEG 3
n01669191/n01669191_2352.JPEG 3
n01669191/n01669191_2355.JPEG 3
n01669191/n01669191_2373.JPEG 3
n01669191/n01669191_2384.JPEG 3
n01669191/n01669191_2423.JPEG 3
n01669191/n01669191_2428.JPEG 3
n01669191/n01669191_2434.JPEG 3
n01669191/n01669191_2437.JPEG 3
n01669191/n01669191_2443.JPEG 3
n01669191/n01669191_2446.JPEG 3
n01669191/n01669191_2447.JPEG 3
n01669191/n01669191_2471.JPEG 3
n01669191/n01669191_2475.JPEG 3
n01669191/n01669191_2477.JPEG 3
n01669191/n01669191_2485.JPEG 3
n01669191/n01669191_2496.JPEG 3
n01669191/n01669191_2511.JPEG 3
n01669191/n01669191_2512.JPEG 3
n01669191/n01669191_2524.JPEG 3
n01669191/n01669191_2537.JPEG 3
n01669191/n01669191_2546.JPEG 3
n01669191/n01669191_2549.JPEG 3
n01669191/n01669191_2564.JPEG 3
n01669191/n01669191_2580.JPEG 3
n01669191/n01669191_2582.JPEG 3
n01669191/n01669191_2585.JPEG 3
n01669191/n01669191_2586.JPEG 3
n01669191/n01669191_2597.JPEG 3
n01669191/n01669191_26.JPEG 3
n01669191/n01669191_2600.JPEG 3
n01669191/n01669191_2608.JPEG 3
n01669191/n01669191_2612.JPEG 3
n01669191/n01669191_2631.JPEG 3
n01669191/n01669191_2633.JPEG 3
n01669191/n01669191_2636.JPEG 3
n01669191/n01669191_2642.JPEG 3
n01669191/n01669191_2667.JPEG 3
n01669191/n01669191_2674.JPEG 3
n01669191/n01669191_2682.JPEG 3
n01669191/n01669191_2704.JPEG 3
n01669191/n01669191_2711.JPEG 3
n01669191/n01669191_2728.JPEG 3
n01669191/n01669191_2729.JPEG 3
n01669191/n01669191_2735.JPEG 3
n01669191/n01669191_2739.JPEG 3
n01669191/n01669191_274.JPEG 3
n01669191/n01669191_2743.JPEG 3
n01669191/n01669191_2748.JPEG 3
n01669191/n01669191_2749.JPEG 3
n01669191/n01669191_2776.JPEG 3
n01669191/n01669191_281.JPEG 3
n01669191/n01669191_2816.JPEG 3
n01669191/n01669191_282.JPEG 3
n01669191/n01669191_2822.JPEG 3
n01669191/n01669191_2826.JPEG 3
n01669191/n01669191_284.JPEG 3
n01669191/n01669191_2859.JPEG 3
n01669191/n01669191_2865.JPEG 3
n01669191/n01669191_2866.JPEG 3
n01669191/n01669191_2871.JPEG 3
n01669191/n01669191_2877.JPEG 3
n01669191/n01669191_288.JPEG 3
n01669191/n01669191_2880.JPEG 3
n01669191/n01669191_2883.JPEG 3
n01669191/n01669191_2887.JPEG 3
n01669191/n01669191_2888.JPEG 3
n01669191/n01669191_2889.JPEG 3
n01669191/n01669191_2893.JPEG 3
n01669191/n01669191_2895.JPEG 3
n01669191/n01669191_2904.JPEG 3
n01669191/n01669191_2908.JPEG 3
n01669191/n01669191_2912.JPEG 3
n01669191/n01669191_293.JPEG 3
n01669191/n01669191_302.JPEG 3
n01669191/n01669191_3036.JPEG 3
n01669191/n01669191_3052.JPEG 3
n01669191/n01669191_3054.JPEG 3
n01669191/n01669191_3058.JPEG 3
n01669191/n01669191_3061.JPEG 3
n01669191/n01669191_3073.JPEG 3
n01669191/n01669191_3074.JPEG 3
n01669191/n01669191_3080.JPEG 3
n01669191/n01669191_31.JPEG 3
n01669191/n01669191_311.JPEG 3
n01669191/n01669191_3112.JPEG 3
n01669191/n01669191_3133.JPEG 3
n01669191/n01669191_3141.JPEG 3
n01669191/n01669191_3152.JPEG 3
n01669191/n01669191_3162.JPEG 3
n01669191/n01669191_3176.JPEG 3
n01669191/n01669191_3190.JPEG 3
n01669191/n01669191_3193.JPEG 3
n01669191/n01669191_320.JPEG 3
n01669191/n01669191_3215.JPEG 3
n01669191/n01669191_322.JPEG 3
n01669191/n01669191_3230.JPEG 3
n01669191/n01669191_3244.JPEG 3
n01669191/n01669191_3255.JPEG 3
n01669191/n01669191_3258.JPEG 3
n01669191/n01669191_3265.JPEG 3
n01669191/n01669191_3275.JPEG 3
n01669191/n01669191_3286.JPEG 3
n01669191/n01669191_3289.JPEG 3
n01669191/n01669191_329.JPEG 3
n01669191/n01669191_3292.JPEG 3
n01669191/n01669191_3299.JPEG 3
n01669191/n01669191_33.JPEG 3
n01669191/n01669191_3309.JPEG 3
n01669191/n01669191_331.JPEG 3
n01669191/n01669191_3313.JPEG 3
n01669191/n01669191_3334.JPEG 3
n01669191/n01669191_3358.JPEG 3
n01669191/n01669191_3359.JPEG 3
n01669191/n01669191_3363.JPEG 3
n01669191/n01669191_3364.JPEG 3
n01669191/n01669191_338.JPEG 3
n01669191/n01669191_339.JPEG 3
n01669191/n01669191_3403.JPEG 3
n01669191/n01669191_345.JPEG 3
n01669191/n01669191_3460.JPEG 3
n01669191/n01669191_3462.JPEG 3
n01669191/n01669191_3481.JPEG 3
n01669191/n01669191_3491.JPEG 3
n01669191/n01669191_35.JPEG 3
n01669191/n01669191_3504.JPEG 3
n01669191/n01669191_351.JPEG 3
n01669191/n01669191_3515.JPEG 3
n01669191/n01669191_3555.JPEG 3
n01669191/n01669191_3588.JPEG 3
n01669191/n01669191_3601.JPEG 3
n01669191/n01669191_3612.JPEG 3
n01669191/n01669191_3629.JPEG 3
n01669191/n01669191_3633.JPEG 3
n01669191/n01669191_3635.JPEG 3
n01669191/n01669191_3646.JPEG 3
n01669191/n01669191_3647.JPEG 3
n01669191/n01669191_3654.JPEG 3
n01669191/n01669191_3672.JPEG 3
n01669191/n01669191_3675.JPEG 3
n01669191/n01669191_3678.JPEG 3
n01669191/n01669191_3679.JPEG 3
n01669191/n01669191_3687.JPEG 3
n01669191/n01669191_3701.JPEG 3
n01669191/n01669191_3716.JPEG 3
n01669191/n01669191_3731.JPEG 3
n01669191/n01669191_3735.JPEG 3
n01669191/n01669191_374.JPEG 3
n01669191/n01669191_3751.JPEG 3
n01669191/n01669191_3757.JPEG 3
n01669191/n01669191_3758.JPEG 3
n01669191/n01669191_3770.JPEG 3
n01669191/n01669191_3779.JPEG 3
n01669191/n01669191_3784.JPEG 3
n01669191/n01669191_3786.JPEG 3
n01669191/n01669191_3788.JPEG 3
n01669191/n01669191_3789.JPEG 3
n01669191/n01669191_3820.JPEG 3
n01669191/n01669191_3829.JPEG 3
n01669191/n01669191_3849.JPEG 3
n01669191/n01669191_3868.JPEG 3
n01669191/n01669191_3877.JPEG 3
n01669191/n01669191_3887.JPEG 3
n01669191/n01669191_3894.JPEG 3
n01669191/n01669191_3899.JPEG 3
n01669191/n01669191_3900.JPEG 3
n01669191/n01669191_3903.JPEG 3
n01669191/n01669191_3910.JPEG 3
n01669191/n01669191_3911.JPEG 3
n01669191/n01669191_3913.JPEG 3
n01669191/n01669191_3930.JPEG 3
n01669191/n01669191_3932.JPEG 3
n01669191/n01669191_3948.JPEG 3
n01669191/n01669191_395.JPEG 3
n01669191/n01669191_3961.JPEG 3
n01669191/n01669191_3967.JPEG 3
n01669191/n01669191_3983.JPEG 3
n01669191/n01669191_3986.JPEG 3
n01669191/n01669191_3987.JPEG 3
n01669191/n01669191_4005.JPEG 3
n01669191/n01669191_402.JPEG 3
n01669191/n01669191_4029.JPEG 3
n01669191/n01669191_4032.JPEG 3
n01669191/n01669191_4034.JPEG 3
n01669191/n01669191_4038.JPEG 3
n01669191/n01669191_4047.JPEG 3
n01669191/n01669191_4050.JPEG 3
n01669191/n01669191_4060.JPEG 3
n01669191/n01669191_4063.JPEG 3
n01669191/n01669191_4068.JPEG 3
n01669191/n01669191_4084.JPEG 3
n01669191/n01669191_4102.JPEG 3
n01669191/n01669191_4109.JPEG 3
n01669191/n01669191_4111.JPEG 3
n01669191/n01669191_413.JPEG 3
n01669191/n01669191_4131.JPEG 3
n01669191/n01669191_4143.JPEG 3
n01669191/n01669191_415.JPEG 3
n01669191/n01669191_417.JPEG 3
n01669191/n01669191_4198.JPEG 3
n01669191/n01669191_4207.JPEG 3
n01669191/n01669191_4210.JPEG 3
n01669191/n01669191_4211.JPEG 3
n01669191/n01669191_4222.JPEG 3
n01669191/n01669191_4223.JPEG 3
n01669191/n01669191_4224.JPEG 3
n01669191/n01669191_4227.JPEG 3
n01669191/n01669191_423.JPEG 3
n01669191/n01669191_4231.JPEG 3
n01669191/n01669191_4239.JPEG 3
n01669191/n01669191_4242.JPEG 3
n01669191/n01669191_4243.JPEG 3
n01669191/n01669191_4249.JPEG 3
n01669191/n01669191_4250.JPEG 3
n01669191/n01669191_4251.JPEG 3
n01669191/n01669191_4252.JPEG 3
n01669191/n01669191_4255.JPEG 3
n01669191/n01669191_4274.JPEG 3
n01669191/n01669191_4275.JPEG 3
n01669191/n01669191_4282.JPEG 3
n01669191/n01669191_4285.JPEG 3
n01669191/n01669191_4289.JPEG 3
n01669191/n01669191_4290.JPEG 3
n01669191/n01669191_4293.JPEG 3
n01669191/n01669191_4294.JPEG 3
n01669191/n01669191_4303.JPEG 3
n01669191/n01669191_4304.JPEG 3
n01669191/n01669191_4312.JPEG 3
n01669191/n01669191_4313.JPEG 3
n01669191/n01669191_4318.JPEG 3
n01669191/n01669191_432.JPEG 3
n01669191/n01669191_4321.JPEG 3
n01669191/n01669191_4323.JPEG 3
n01669191/n01669191_433.JPEG 3
n01669191/n01669191_4338.JPEG 3
n01669191/n01669191_4342.JPEG 3
n01669191/n01669191_436.JPEG 3
n01669191/n01669191_4364.JPEG 3
n01669191/n01669191_4365.JPEG 3
n01669191/n01669191_4368.JPEG 3
n01669191/n01669191_438.JPEG 3
n01669191/n01669191_4382.JPEG 3
n01669191/n01669191_4385.JPEG 3
n01669191/n01669191_439.JPEG 3
n01669191/n01669191_4398.JPEG 3
n01669191/n01669191_4399.JPEG 3
n01669191/n01669191_4400.JPEG 3
n01669191/n01669191_4402.JPEG 3
n01669191/n01669191_4411.JPEG 3
n01669191/n01669191_4429.JPEG 3
n01669191/n01669191_4432.JPEG 3
n01669191/n01669191_4440.JPEG 3
n01669191/n01669191_4445.JPEG 3
n01669191/n01669191_445.JPEG 3
n01669191/n01669191_4451.JPEG 3
n01669191/n01669191_4455.JPEG 3
n01669191/n01669191_4460.JPEG 3
n01669191/n01669191_4463.JPEG 3
n01669191/n01669191_4467.JPEG 3
n01669191/n01669191_4470.JPEG 3
n01669191/n01669191_4471.JPEG 3
n01669191/n01669191_4472.JPEG 3
n01669191/n01669191_4473.JPEG 3
n01669191/n01669191_448.JPEG 3
n01669191/n01669191_4481.JPEG 3
n01669191/n01669191_4485.JPEG 3
n01669191/n01669191_4487.JPEG 3
n01669191/n01669191_4493.JPEG 3
n01669191/n01669191_4495.JPEG 3
n01669191/n01669191_45.JPEG 3
n01669191/n01669191_4503.JPEG 3
n01669191/n01669191_4507.JPEG 3
n01669191/n01669191_451.JPEG 3
n01669191/n01669191_4510.JPEG 3
n01669191/n01669191_4511.JPEG 3
n01669191/n01669191_4517.JPEG 3
n01669191/n01669191_4529.JPEG 3
n01669191/n01669191_4531.JPEG 3
n01669191/n01669191_4535.JPEG 3
n01669191/n01669191_4541.JPEG 3
n01669191/n01669191_4542.JPEG 3
n01669191/n01669191_4545.JPEG 3
n01669191/n01669191_4561.JPEG 3
n01669191/n01669191_4563.JPEG 3
n01669191/n01669191_4564.JPEG 3
n01669191/n01669191_4566.JPEG 3
n01669191/n01669191_4576.JPEG 3
n01669191/n01669191_4579.JPEG 3
n01669191/n01669191_4580.JPEG 3
n01669191/n01669191_4588.JPEG 3
n01669191/n01669191_459.JPEG 3
n01669191/n01669191_4590.JPEG 3
n01669191/n01669191_46.JPEG 3
n01669191/n01669191_461.JPEG 3
n01669191/n01669191_4613.JPEG 3
n01669191/n01669191_4615.JPEG 3
n01669191/n01669191_4623.JPEG 3
n01669191/n01669191_4627.JPEG 3
n01669191/n01669191_4629.JPEG 3
n01669191/n01669191_4637.JPEG 3
n01669191/n01669191_464.JPEG 3
n01669191/n01669191_4640.JPEG 3
n01669191/n01669191_4643.JPEG 3
n01669191/n01669191_4683.JPEG 3
n01669191/n01669191_4713.JPEG 3
n01669191/n01669191_4732.JPEG 3
n01669191/n01669191_4749.JPEG 3
n01669191/n01669191_4768.JPEG 3
n01669191/n01669191_4778.JPEG 3
n01669191/n01669191_479.JPEG 3
n01669191/n01669191_4791.JPEG 3
n01669191/n01669191_4796.JPEG 3
n01669191/n01669191_4829.JPEG 3
n01669191/n01669191_4831.JPEG 3
n01669191/n01669191_4834.JPEG 3
n01669191/n01669191_4837.JPEG 3
n01669191/n01669191_4856.JPEG 3
n01669191/n01669191_4869.JPEG 3
n01669191/n01669191_4886.JPEG 3
n01669191/n01669191_49.JPEG 3
n01669191/n01669191_4913.JPEG 3
n01669191/n01669191_4917.JPEG 3
n01669191/n01669191_492.JPEG 3
n01669191/n01669191_493.JPEG 3
n01669191/n01669191_4934.JPEG 3
n01669191/n01669191_4946.JPEG 3
n01669191/n01669191_4973.JPEG 3
n01669191/n01669191_4989.JPEG 3
n01669191/n01669191_5011.JPEG 3
n01669191/n01669191_5016.JPEG 3
n01669191/n01669191_502.JPEG 3
n01669191/n01669191_5025.JPEG 3
n01669191/n01669191_5048.JPEG 3
n01669191/n01669191_5064.JPEG 3
n01669191/n01669191_5075.JPEG 3
n01669191/n01669191_5088.JPEG 3
n01669191/n01669191_5092.JPEG 3
n01669191/n01669191_5109.JPEG 3
n01669191/n01669191_5111.JPEG 3
n01669191/n01669191_5143.JPEG 3
n01669191/n01669191_5153.JPEG 3
n01669191/n01669191_5164.JPEG 3
n01669191/n01669191_5168.JPEG 3
n01669191/n01669191_5193.JPEG 3
n01669191/n01669191_5215.JPEG 3
n01669191/n01669191_5243.JPEG 3
n01669191/n01669191_5244.JPEG 3
n01669191/n01669191_5257.JPEG 3
n01669191/n01669191_5258.JPEG 3
n01669191/n01669191_5267.JPEG 3
n01669191/n01669191_5279.JPEG 3
n01669191/n01669191_5308.JPEG 3
n01669191/n01669191_5311.JPEG 3
n01669191/n01669191_5312.JPEG 3
n01669191/n01669191_5332.JPEG 3
n01669191/n01669191_5337.JPEG 3
n01669191/n01669191_5339.JPEG 3
n01669191/n01669191_5345.JPEG 3
n01669191/n01669191_5346.JPEG 3
n01669191/n01669191_5350.JPEG 3
n01669191/n01669191_5370.JPEG 3
n01669191/n01669191_5382.JPEG 3
n01669191/n01669191_5385.JPEG 3
n01669191/n01669191_5412.JPEG 3
n01669191/n01669191_5415.JPEG 3
n01669191/n01669191_5417.JPEG 3
n01669191/n01669191_5437.JPEG 3
n01669191/n01669191_5438.JPEG 3
n01669191/n01669191_5441.JPEG 3
n01669191/n01669191_5442.JPEG 3
n01669191/n01669191_546.JPEG 3
n01669191/n01669191_5474.JPEG 3
n01669191/n01669191_550.JPEG 3
n01669191/n01669191_5526.JPEG 3
n01669191/n01669191_5530.JPEG 3
n01669191/n01669191_5564.JPEG 3
n01669191/n01669191_558.JPEG 3
n01669191/n01669191_5590.JPEG 3
n01669191/n01669191_5599.JPEG 3
n01669191/n01669191_5602.JPEG 3
n01669191/n01669191_561.JPEG 3
n01669191/n01669191_5613.JPEG 3
n01669191/n01669191_5614.JPEG 3
n01669191/n01669191_5619.JPEG 3
n01669191/n01669191_562.JPEG 3
n01669191/n01669191_5627.JPEG 3
n01669191/n01669191_5644.JPEG 3
n01669191/n01669191_5698.JPEG 3
n01669191/n01669191_5712.JPEG 3
n01669191/n01669191_5722.JPEG 3
n01669191/n01669191_5726.JPEG 3
n01669191/n01669191_5727.JPEG 3
n01669191/n01669191_5729.JPEG 3
n01669191/n01669191_5746.JPEG 3
n01669191/n01669191_5757.JPEG 3
n01669191/n01669191_576.JPEG 3
n01669191/n01669191_5761.JPEG 3
n01669191/n01669191_5762.JPEG 3
n01669191/n01669191_5767.JPEG 3
n01669191/n01669191_5780.JPEG 3
n01669191/n01669191_5809.JPEG 3
n01669191/n01669191_5844.JPEG 3
n01669191/n01669191_5857.JPEG 3
n01669191/n01669191_5861.JPEG 3
n01669191/n01669191_5875.JPEG 3
n01669191/n01669191_5877.JPEG 3
n01669191/n01669191_5894.JPEG 3
n01669191/n01669191_5927.JPEG 3
n01669191/n01669191_593.JPEG 3
n01669191/n01669191_5933.JPEG 3
n01669191/n01669191_5948.JPEG 3
n01669191/n01669191_5949.JPEG 3
n01669191/n01669191_595.JPEG 3
n01669191/n01669191_5977.JPEG 3
n01669191/n01669191_5982.JPEG 3
n01669191/n01669191_5998.JPEG 3
n01669191/n01669191_6004.JPEG 3
n01669191/n01669191_6012.JPEG 3
n01669191/n01669191_6043.JPEG 3
n01669191/n01669191_6064.JPEG 3
n01669191/n01669191_6072.JPEG 3
n01669191/n01669191_6103.JPEG 3
n01669191/n01669191_6119.JPEG 3
n01669191/n01669191_612.JPEG 3
n01669191/n01669191_6153.JPEG 3
n01669191/n01669191_616.JPEG 3
n01669191/n01669191_6183.JPEG 3
n01669191/n01669191_619.JPEG 3
n01669191/n01669191_6216.JPEG 3
n01669191/n01669191_622.JPEG 3
n01669191/n01669191_6243.JPEG 3
n01669191/n01669191_6255.JPEG 3
n01669191/n01669191_627.JPEG 3
n01669191/n01669191_6273.JPEG 3
n01669191/n01669191_6282.JPEG 3
n01669191/n01669191_6293.JPEG 3
n01669191/n01669191_6296.JPEG 3
n01669191/n01669191_6305.JPEG 3
n01669191/n01669191_6308.JPEG 3
n01669191/n01669191_631.JPEG 3
n01669191/n01669191_6310.JPEG 3
n01669191/n01669191_6317.JPEG 3
n01669191/n01669191_6320.JPEG 3
n01669191/n01669191_6327.JPEG 3
n01669191/n01669191_6329.JPEG 3
n01669191/n01669191_6336.JPEG 3
n01669191/n01669191_6350.JPEG 3
n01669191/n01669191_637.JPEG 3
n01669191/n01669191_6374.JPEG 3
n01669191/n01669191_6378.JPEG 3
n01669191/n01669191_6389.JPEG 3
n01669191/n01669191_6397.JPEG 3
n01669191/n01669191_640.JPEG 3
n01669191/n01669191_6402.JPEG 3
n01669191/n01669191_6417.JPEG 3
n01669191/n01669191_6422.JPEG 3
n01669191/n01669191_6428.JPEG 3
n01669191/n01669191_6448.JPEG 3
n01669191/n01669191_6462.JPEG 3
n01669191/n01669191_6507.JPEG 3
n01669191/n01669191_6522.JPEG 3
n01669191/n01669191_6532.JPEG 3
n01669191/n01669191_6563.JPEG 3
n01669191/n01669191_6590.JPEG 3
n01669191/n01669191_660.JPEG 3
n01669191/n01669191_662.JPEG 3
n01669191/n01669191_6646.JPEG 3
n01669191/n01669191_6652.JPEG 3
n01669191/n01669191_6657.JPEG 3
n01669191/n01669191_666.JPEG 3
n01669191/n01669191_6662.JPEG 3
n01669191/n01669191_67.JPEG 3
n01669191/n01669191_671.JPEG 3
n01669191/n01669191_6714.JPEG 3
n01669191/n01669191_6716.JPEG 3
n01669191/n01669191_6723.JPEG 3
n01669191/n01669191_6747.JPEG 3
n01669191/n01669191_6760.JPEG 3
n01669191/n01669191_679.JPEG 3
n01669191/n01669191_6800.JPEG 3
n01669191/n01669191_6804.JPEG 3
n01669191/n01669191_685.JPEG 3
n01669191/n01669191_6874.JPEG 3
n01669191/n01669191_6881.JPEG 3
n01669191/n01669191_6883.JPEG 3
n01669191/n01669191_6890.JPEG 3
n01669191/n01669191_6963.JPEG 3
n01669191/n01669191_6969.JPEG 3
n01669191/n01669191_6997.JPEG 3
n01669191/n01669191_701.JPEG 3
n01669191/n01669191_7011.JPEG 3
n01669191/n01669191_7024.JPEG 3
n01669191/n01669191_71.JPEG 3
n01669191/n01669191_7116.JPEG 3
n01669191/n01669191_7137.JPEG 3
n01669191/n01669191_715.JPEG 3
n01669191/n01669191_7154.JPEG 3
n01669191/n01669191_7191.JPEG 3
n01669191/n01669191_7198.JPEG 3
n01669191/n01669191_7205.JPEG 3
n01669191/n01669191_7208.JPEG 3
n01669191/n01669191_7217.JPEG 3
n01669191/n01669191_7221.JPEG 3
n01669191/n01669191_7250.JPEG 3
n01669191/n01669191_7258.JPEG 3
n01669191/n01669191_7259.JPEG 3
n01669191/n01669191_7263.JPEG 3
n01669191/n01669191_7282.JPEG 3
n01669191/n01669191_7321.JPEG 3
n01669191/n01669191_7340.JPEG 3
n01669191/n01669191_7349.JPEG 3
n01669191/n01669191_7364.JPEG 3
n01669191/n01669191_7394.JPEG 3
n01669191/n01669191_7401.JPEG 3
n01669191/n01669191_7439.JPEG 3
n01669191/n01669191_7443.JPEG 3
n01669191/n01669191_7445.JPEG 3
n01669191/n01669191_745.JPEG 3
n01669191/n01669191_7466.JPEG 3
n01669191/n01669191_75.JPEG 3
n01669191/n01669191_7519.JPEG 3
n01669191/n01669191_7522.JPEG 3
n01669191/n01669191_7538.JPEG 3
n01669191/n01669191_754.JPEG 3
n01669191/n01669191_7545.JPEG 3
n01669191/n01669191_7567.JPEG 3
n01669191/n01669191_7574.JPEG 3
n01669191/n01669191_7589.JPEG 3
n01669191/n01669191_7592.JPEG 3
n01669191/n01669191_7596.JPEG 3
n01669191/n01669191_7601.JPEG 3
n01669191/n01669191_7608.JPEG 3
n01669191/n01669191_7614.JPEG 3
n01669191/n01669191_7632.JPEG 3
n01669191/n01669191_7638.JPEG 3
n01669191/n01669191_7639.JPEG 3
n01669191/n01669191_7641.JPEG 3
n01669191/n01669191_7647.JPEG 3
n01669191/n01669191_766.JPEG 3
n01669191/n01669191_7660.JPEG 3
n01669191/n01669191_7662.JPEG 3
n01669191/n01669191_7667.JPEG 3
n01669191/n01669191_7673.JPEG 3
n01669191/n01669191_7682.JPEG 3
n01669191/n01669191_7684.JPEG 3
n01669191/n01669191_7686.JPEG 3
n01669191/n01669191_769.JPEG 3
n01669191/n01669191_7706.JPEG 3
n01669191/n01669191_7709.JPEG 3
n01669191/n01669191_7713.JPEG 3
n01669191/n01669191_7714.JPEG 3
n01669191/n01669191_7720.JPEG 3
n01669191/n01669191_7729.JPEG 3
n01669191/n01669191_7732.JPEG 3
n01669191/n01669191_7740.JPEG 3
n01669191/n01669191_775.JPEG 3
n01669191/n01669191_7752.JPEG 3
n01669191/n01669191_7753.JPEG 3
n01669191/n01669191_776.JPEG 3
n01669191/n01669191_7763.JPEG 3
n01669191/n01669191_7766.JPEG 3
n01669191/n01669191_7768.JPEG 3
n01669191/n01669191_777.JPEG 3
n01669191/n01669191_7773.JPEG 3
n01669191/n01669191_778.JPEG 3
n01669191/n01669191_7787.JPEG 3
n01669191/n01669191_7791.JPEG 3
n01669191/n01669191_7792.JPEG 3
n01669191/n01669191_7799.JPEG 3
n01669191/n01669191_7801.JPEG 3
n01669191/n01669191_7810.JPEG 3
n01669191/n01669191_7817.JPEG 3
n01669191/n01669191_7839.JPEG 3
n01669191/n01669191_7842.JPEG 3
n01669191/n01669191_7843.JPEG 3
n01669191/n01669191_7854.JPEG 3
n01669191/n01669191_7859.JPEG 3
n01669191/n01669191_7874.JPEG 3
n01669191/n01669191_7877.JPEG 3
n01669191/n01669191_788.JPEG 3
n01669191/n01669191_7884.JPEG 3
n01669191/n01669191_7895.JPEG 3
n01669191/n01669191_7896.JPEG 3
n01669191/n01669191_79.JPEG 3
n01669191/n01669191_7901.JPEG 3
n01669191/n01669191_7903.JPEG 3
n01669191/n01669191_7908.JPEG 3
n01669191/n01669191_7912.JPEG 3
n01669191/n01669191_7918.JPEG 3
n01669191/n01669191_7919.JPEG 3
n01669191/n01669191_7920.JPEG 3
n01669191/n01669191_7929.JPEG 3
n01669191/n01669191_7931.JPEG 3
n01669191/n01669191_7934.JPEG 3
n01669191/n01669191_7936.JPEG 3
n01669191/n01669191_7939.JPEG 3
n01669191/n01669191_7941.JPEG 3
n01669191/n01669191_7942.JPEG 3
n01669191/n01669191_7944.JPEG 3
n01669191/n01669191_7948.JPEG 3
n01669191/n01669191_7949.JPEG 3
n01669191/n01669191_7954.JPEG 3
n01669191/n01669191_7959.JPEG 3
n01669191/n01669191_7961.JPEG 3
n01669191/n01669191_7963.JPEG 3
n01669191/n01669191_7969.JPEG 3
n01669191/n01669191_7974.JPEG 3
n01669191/n01669191_7979.JPEG 3
n01669191/n01669191_7981.JPEG 3
n01669191/n01669191_7982.JPEG 3
n01669191/n01669191_7986.JPEG 3
n01669191/n01669191_7988.JPEG 3
n01669191/n01669191_80.JPEG 3
n01669191/n01669191_8007.JPEG 3
n01669191/n01669191_8009.JPEG 3
n01669191/n01669191_8014.JPEG 3
n01669191/n01669191_8016.JPEG 3
n01669191/n01669191_8021.JPEG 3
n01669191/n01669191_8027.JPEG 3
n01669191/n01669191_8029.JPEG 3
n01669191/n01669191_8054.JPEG 3
n01669191/n01669191_8055.JPEG 3
n01669191/n01669191_8063.JPEG 3
n01669191/n01669191_8067.JPEG 3
n01669191/n01669191_8069.JPEG 3
n01669191/n01669191_8075.JPEG 3
n01669191/n01669191_8076.JPEG 3
n01669191/n01669191_8078.JPEG 3
n01669191/n01669191_808.JPEG 3
n01669191/n01669191_8080.JPEG 3
n01669191/n01669191_8088.JPEG 3
n01669191/n01669191_8092.JPEG 3
n01669191/n01669191_8102.JPEG 3
n01669191/n01669191_8104.JPEG 3
n01669191/n01669191_8107.JPEG 3
n01669191/n01669191_8112.JPEG 3
n01669191/n01669191_8116.JPEG 3
n01669191/n01669191_8118.JPEG 3
n01669191/n01669191_8125.JPEG 3
n01669191/n01669191_8139.JPEG 3
n01669191/n01669191_8142.JPEG 3
n01669191/n01669191_8145.JPEG 3
n01669191/n01669191_8154.JPEG 3
n01669191/n01669191_8157.JPEG 3
n01669191/n01669191_8159.JPEG 3
n01669191/n01669191_8168.JPEG 3
n01669191/n01669191_8169.JPEG 3
n01669191/n01669191_8172.JPEG 3
n01669191/n01669191_8176.JPEG 3
n01669191/n01669191_8192.JPEG 3
n01669191/n01669191_8199.JPEG 3
n01669191/n01669191_8204.JPEG 3
n01669191/n01669191_8205.JPEG 3
n01669191/n01669191_8206.JPEG 3
n01669191/n01669191_8219.JPEG 3
n01669191/n01669191_8226.JPEG 3
n01669191/n01669191_8227.JPEG 3
n01669191/n01669191_8228.JPEG 3
n01669191/n01669191_823.JPEG 3
n01669191/n01669191_8231.JPEG 3
n01669191/n01669191_8232.JPEG 3
n01669191/n01669191_8235.JPEG 3
n01669191/n01669191_8236.JPEG 3
n01669191/n01669191_8237.JPEG 3
n01669191/n01669191_8238.JPEG 3
n01669191/n01669191_8247.JPEG 3
n01669191/n01669191_825.JPEG 3
n01669191/n01669191_8253.JPEG 3
n01669191/n01669191_826.JPEG 3
n01669191/n01669191_8260.JPEG 3
n01669191/n01669191_8261.JPEG 3
n01669191/n01669191_8267.JPEG 3
n01669191/n01669191_8269.JPEG 3
n01669191/n01669191_8273.JPEG 3
n01669191/n01669191_8299.JPEG 3
n01669191/n01669191_8310.JPEG 3
n01669191/n01669191_8319.JPEG 3
n01669191/n01669191_832.JPEG 3
n01669191/n01669191_8321.JPEG 3
n01669191/n01669191_833.JPEG 3
n01669191/n01669191_8336.JPEG 3
n01669191/n01669191_8361.JPEG 3
n01669191/n01669191_8365.JPEG 3
n01669191/n01669191_8368.JPEG 3
n01669191/n01669191_8379.JPEG 3
n01669191/n01669191_8383.JPEG 3
n01669191/n01669191_8399.JPEG 3
n01669191/n01669191_8413.JPEG 3
n01669191/n01669191_8420.JPEG 3
n01669191/n01669191_8422.JPEG 3
n01669191/n01669191_8428.JPEG 3
n01669191/n01669191_8440.JPEG 3
n01669191/n01669191_8460.JPEG 3
n01669191/n01669191_8464.JPEG 3
n01669191/n01669191_8466.JPEG 3
n01669191/n01669191_847.JPEG 3
n01669191/n01669191_8486.JPEG 3
n01669191/n01669191_8490.JPEG 3
n01669191/n01669191_8506.JPEG 3
n01669191/n01669191_8517.JPEG 3
n01669191/n01669191_8525.JPEG 3
n01669191/n01669191_8529.JPEG 3
n01669191/n01669191_8561.JPEG 3
n01669191/n01669191_8571.JPEG 3
n01669191/n01669191_8589.JPEG 3
n01669191/n01669191_8590.JPEG 3
n01669191/n01669191_86.JPEG 3
n01669191/n01669191_8619.JPEG 3
n01669191/n01669191_862.JPEG 3
n01669191/n01669191_8621.JPEG 3
n01669191/n01669191_8631.JPEG 3
n01669191/n01669191_8639.JPEG 3
n01669191/n01669191_8649.JPEG 3
n01669191/n01669191_865.JPEG 3
n01669191/n01669191_8664.JPEG 3
n01669191/n01669191_8676.JPEG 3
n01669191/n01669191_868.JPEG 3
n01669191/n01669191_8684.JPEG 3
n01669191/n01669191_869.JPEG 3
n01669191/n01669191_8702.JPEG 3
n01669191/n01669191_8725.JPEG 3
n01669191/n01669191_8760.JPEG 3
n01669191/n01669191_8776.JPEG 3
n01669191/n01669191_8777.JPEG 3
n01669191/n01669191_8787.JPEG 3
n01669191/n01669191_8801.JPEG 3
n01669191/n01669191_8803.JPEG 3
n01669191/n01669191_8807.JPEG 3
n01669191/n01669191_881.JPEG 3
n01669191/n01669191_8823.JPEG 3
n01669191/n01669191_8826.JPEG 3
n01669191/n01669191_8839.JPEG 3
n01669191/n01669191_8845.JPEG 3
n01669191/n01669191_8856.JPEG 3
n01669191/n01669191_8861.JPEG 3
n01669191/n01669191_8863.JPEG 3
n01669191/n01669191_887.JPEG 3
n01669191/n01669191_8872.JPEG 3
n01669191/n01669191_8875.JPEG 3
n01669191/n01669191_8882.JPEG 3
n01669191/n01669191_8900.JPEG 3
n01669191/n01669191_8902.JPEG 3
n01669191/n01669191_891.JPEG 3
n01669191/n01669191_8916.JPEG 3
n01669191/n01669191_8917.JPEG 3
n01669191/n01669191_8919.JPEG 3
n01669191/n01669191_8920.JPEG 3
n01669191/n01669191_8921.JPEG 3
n01669191/n01669191_8938.JPEG 3
n01669191/n01669191_8953.JPEG 3
n01669191/n01669191_8956.JPEG 3
n01669191/n01669191_8961.JPEG 3
n01669191/n01669191_897.JPEG 3
n01669191/n01669191_8976.JPEG 3
n01669191/n01669191_8981.JPEG 3
n01669191/n01669191_899.JPEG 3
n01669191/n01669191_9006.JPEG 3
n01669191/n01669191_9010.JPEG 3
n01669191/n01669191_9015.JPEG 3
n01669191/n01669191_9017.JPEG 3
n01669191/n01669191_904.JPEG 3
n01669191/n01669191_9049.JPEG 3
n01669191/n01669191_9057.JPEG 3
n01669191/n01669191_9059.JPEG 3
n01669191/n01669191_9060.JPEG 3
n01669191/n01669191_9065.JPEG 3
n01669191/n01669191_9069.JPEG 3
n01669191/n01669191_9070.JPEG 3
n01669191/n01669191_9088.JPEG 3
n01669191/n01669191_9096.JPEG 3
n01669191/n01669191_9100.JPEG 3
n01669191/n01669191_9103.JPEG 3
n01669191/n01669191_9112.JPEG 3
n01669191/n01669191_913.JPEG 3
n01669191/n01669191_9140.JPEG 3
n01669191/n01669191_9141.JPEG 3
n01669191/n01669191_9151.JPEG 3
n01669191/n01669191_9168.JPEG 3
n01669191/n01669191_9169.JPEG 3
n01669191/n01669191_9175.JPEG 3
n01669191/n01669191_9194.JPEG 3
n01669191/n01669191_9195.JPEG 3
n01669191/n01669191_92.JPEG 3
n01669191/n01669191_9212.JPEG 3
n01669191/n01669191_9214.JPEG 3
n01669191/n01669191_922.JPEG 3
n01669191/n01669191_9231.JPEG 3
n01669191/n01669191_9245.JPEG 3
n01669191/n01669191_9288.JPEG 3
n01669191/n01669191_9289.JPEG 3
n01669191/n01669191_9291.JPEG 3
n01669191/n01669191_9292.JPEG 3
n01669191/n01669191_9295.JPEG 3
n01669191/n01669191_9299.JPEG 3
n01669191/n01669191_9304.JPEG 3
n01669191/n01669191_9317.JPEG 3
n01669191/n01669191_9341.JPEG 3
n01669191/n01669191_9348.JPEG 3
n01669191/n01669191_9353.JPEG 3
n01669191/n01669191_9359.JPEG 3
n01669191/n01669191_9376.JPEG 3
n01669191/n01669191_9380.JPEG 3
n01669191/n01669191_9387.JPEG 3
n01669191/n01669191_9399.JPEG 3
n01669191/n01669191_941.JPEG 3
n01669191/n01669191_9410.JPEG 3
n01669191/n01669191_9413.JPEG 3
n01669191/n01669191_9417.JPEG 3
n01669191/n01669191_942.JPEG 3
n01669191/n01669191_9423.JPEG 3
n01669191/n01669191_9430.JPEG 3
n01669191/n01669191_9434.JPEG 3
n01669191/n01669191_944.JPEG 3
n01669191/n01669191_9447.JPEG 3
n01669191/n01669191_9459.JPEG 3
n01669191/n01669191_9463.JPEG 3
n01669191/n01669191_9464.JPEG 3
n01669191/n01669191_9467.JPEG 3
n01669191/n01669191_9469.JPEG 3
n01669191/n01669191_9473.JPEG 3
n01669191/n01669191_9476.JPEG 3
n01669191/n01669191_9480.JPEG 3
n01669191/n01669191_9484.JPEG 3
n01669191/n01669191_949.JPEG 3
n01669191/n01669191_9496.JPEG 3
n01669191/n01669191_9501.JPEG 3
n01669191/n01669191_9516.JPEG 3
n01669191/n01669191_9529.JPEG 3
n01669191/n01669191_9535.JPEG 3
n01669191/n01669191_9536.JPEG 3
n01669191/n01669191_9556.JPEG 3
n01669191/n01669191_957.JPEG 3
n01669191/n01669191_9578.JPEG 3
n01669191/n01669191_958.JPEG 3
n01669191/n01669191_9589.JPEG 3
n01669191/n01669191_960.JPEG 3
n01669191/n01669191_9601.JPEG 3
n01669191/n01669191_9605.JPEG 3
n01669191/n01669191_9607.JPEG 3
n01669191/n01669191_9608.JPEG 3
n01669191/n01669191_9629.JPEG 3
n01669191/n01669191_9635.JPEG 3
n01669191/n01669191_9636.JPEG 3
n01669191/n01669191_965.JPEG 3
n01669191/n01669191_966.JPEG 3
n01669191/n01669191_9687.JPEG 3
n01669191/n01669191_973.JPEG 3
n01669191/n01669191_9734.JPEG 3
n01669191/n01669191_9743.JPEG 3
n01669191/n01669191_9750.JPEG 3
n01669191/n01669191_9769.JPEG 3
n01669191/n01669191_9772.JPEG 3
n01669191/n01669191_9776.JPEG 3
n01669191/n01669191_978.JPEG 3
n01669191/n01669191_9809.JPEG 3
n01669191/n01669191_981.JPEG 3
n01669191/n01669191_9811.JPEG 3
n01669191/n01669191_9817.JPEG 3
n01669191/n01669191_9820.JPEG 3
n01669191/n01669191_983.JPEG 3
n01669191/n01669191_9835.JPEG 3
n01669191/n01669191_985.JPEG 3
n01669191/n01669191_9850.JPEG 3
n01669191/n01669191_9859.JPEG 3
n01669191/n01669191_9864.JPEG 3
n01669191/n01669191_9882.JPEG 3
n01669191/n01669191_9893.JPEG 3
n01669191/n01669191_9896.JPEG 3
n01669191/n01669191_9899.JPEG 3
n01669191/n01669191_99.JPEG 3
n01669191/n01669191_9902.JPEG 3
n01669191/n01669191_9912.JPEG 3
n01669191/n01669191_9927.JPEG 3
n01669191/n01669191_9928.JPEG 3
n01669191/n01669191_9949.JPEG 3
n01669191/n01669191_996.JPEG 3
n01669191/n01669191_9961.JPEG 3
n01669191/n01669191_9968.JPEG 3
n01669191/n01669191_9973.JPEG 3
n01669191/n01669191_9974.JPEG 3
n01669191/n01669191_9978.JPEG 3
n01669191/n01669191_9995.JPEG 3
n01669191/n01669191_9999.JPEG 3
n01795545/n01795545_10021.JPEG 4
n01795545/n01795545_10033.JPEG 4
n01795545/n01795545_1004.JPEG 4
n01795545/n01795545_10060.JPEG 4
n01795545/n01795545_10062.JPEG 4
n01795545/n01795545_10077.JPEG 4
n01795545/n01795545_10114.JPEG 4
n01795545/n01795545_10129.JPEG 4
n01795545/n01795545_10132.JPEG 4
n01795545/n01795545_10144.JPEG 4
n01795545/n01795545_10145.JPEG 4
n01795545/n01795545_10159.JPEG 4
n01795545/n01795545_10186.JPEG 4
n01795545/n01795545_10198.JPEG 4
n01795545/n01795545_10240.JPEG 4
n01795545/n01795545_10242.JPEG 4
n01795545/n01795545_10245.JPEG 4
n01795545/n01795545_10256.JPEG 4
n01795545/n01795545_10263.JPEG 4
n01795545/n01795545_10265.JPEG 4
n01795545/n01795545_1028.JPEG 4
n01795545/n01795545_1029.JPEG 4
n01795545/n01795545_10316.JPEG 4
n01795545/n01795545_10330.JPEG 4
n01795545/n01795545_10339.JPEG 4
n01795545/n01795545_10364.JPEG 4
n01795545/n01795545_10373.JPEG 4
n01795545/n01795545_10418.JPEG 4
n01795545/n01795545_1043.JPEG 4
n01795545/n01795545_1046.JPEG 4
n01795545/n01795545_10484.JPEG 4
n01795545/n01795545_10533.JPEG 4
n01795545/n01795545_10536.JPEG 4
n01795545/n01795545_1054.JPEG 4
n01795545/n01795545_10541.JPEG 4
n01795545/n01795545_1055.JPEG 4
n01795545/n01795545_10581.JPEG 4
n01795545/n01795545_10604.JPEG 4
n01795545/n01795545_1061.JPEG 4
n01795545/n01795545_10616.JPEG 4
n01795545/n01795545_10624.JPEG 4
n01795545/n01795545_10649.JPEG 4
n01795545/n01795545_10658.JPEG 4
n01795545/n01795545_10674.JPEG 4
n01795545/n01795545_10715.JPEG 4
n01795545/n01795545_10727.JPEG 4
n01795545/n01795545_10765.JPEG 4
n01795545/n01795545_10804.JPEG 4
n01795545/n01795545_10808.JPEG 4
n01795545/n01795545_10820.JPEG 4
n01795545/n01795545_10826.JPEG 4
n01795545/n01795545_10830.JPEG 4
n01795545/n01795545_1085.JPEG 4
n01795545/n01795545_10862.JPEG 4
n01795545/n01795545_10916.JPEG 4
n01795545/n01795545_10952.JPEG 4
n01795545/n01795545_1097.JPEG 4
n01795545/n01795545_11005.JPEG 4
n01795545/n01795545_11013.JPEG 4
n01795545/n01795545_1102.JPEG 4
n01795545/n01795545_11029.JPEG 4
n01795545/n01795545_1103.JPEG 4
n01795545/n01795545_11037.JPEG 4
n01795545/n01795545_11049.JPEG 4
n01795545/n01795545_11050.JPEG 4
n01795545/n01795545_11074.JPEG 4
n01795545/n01795545_11076.JPEG 4
n01795545/n01795545_1110.JPEG 4
n01795545/n01795545_11136.JPEG 4
n01795545/n01795545_11158.JPEG 4
n01795545/n01795545_11192.JPEG 4
n01795545/n01795545_112.JPEG 4
n01795545/n01795545_11226.JPEG 4
n01795545/n01795545_11228.JPEG 4
n01795545/n01795545_11253.JPEG 4
n01795545/n01795545_11274.JPEG 4
n01795545/n01795545_113.JPEG 4
n01795545/n01795545_11300.JPEG 4
n01795545/n01795545_11314.JPEG 4
n01795545/n01795545_11323.JPEG 4
n01795545/n01795545_11344.JPEG 4
n01795545/n01795545_1142.JPEG 4
n01795545/n01795545_11422.JPEG 4
n01795545/n01795545_11451.JPEG 4
n01795545/n01795545_11464.JPEG 4
n01795545/n01795545_1147.JPEG 4
n01795545/n01795545_1149.JPEG 4
n01795545/n01795545_11497.JPEG 4
n01795545/n01795545_11534.JPEG 4
n01795545/n01795545_11551.JPEG 4
n01795545/n01795545_11554.JPEG 4
n01795545/n01795545_11556.JPEG 4
n01795545/n01795545_11594.JPEG 4
n01795545/n01795545_11636.JPEG 4
n01795545/n01795545_11640.JPEG 4
n01795545/n01795545_1166.JPEG 4
n01795545/n01795545_1170.JPEG 4
n01795545/n01795545_11720.JPEG 4
n01795545/n01795545_1174.JPEG 4
n01795545/n01795545_11765.JPEG 4
n01795545/n01795545_1177.JPEG 4
n01795545/n01795545_11774.JPEG 4
n01795545/n01795545_11780.JPEG 4
n01795545/n01795545_11794.JPEG 4
n01795545/n01795545_11812.JPEG 4
n01795545/n01795545_11828.JPEG 4
n01795545/n01795545_11846.JPEG 4
n01795545/n01795545_11868.JPEG 4
n01795545/n01795545_11875.JPEG 4
n01795545/n01795545_1191.JPEG 4
n01795545/n01795545_11932.JPEG 4
n01795545/n01795545_11962.JPEG 4
n01795545/n01795545_11983.JPEG 4
n01795545/n01795545_1201.JPEG 4
n01795545/n01795545_12015.JPEG 4
n01795545/n01795545_1202.JPEG 4
n01795545/n01795545_12026.JPEG 4
n01795545/n01795545_12031.JPEG 4
n01795545/n01795545_1204.JPEG 4
n01795545/n01795545_1205.JPEG 4
n01795545/n01795545_12052.JPEG 4
n01795545/n01795545_12092.JPEG 4
n01795545/n01795545_12095.JPEG 4
n01795545/n01795545_12142.JPEG 4
n01795545/n01795545_12179.JPEG 4
n01795545/n01795545_12182.JPEG 4
n01795545/n01795545_12191.JPEG 4
n01795545/n01795545_12209.JPEG 4
n01795545/n01795545_12223.JPEG 4
n01795545/n01795545_12250.JPEG 4
n01795545/n01795545_12272.JPEG 4
n01795545/n01795545_12289.JPEG 4
n01795545/n01795545_1229.JPEG 4
n01795545/n01795545_12293.JPEG 4
n01795545/n01795545_12308.JPEG 4
n01795545/n01795545_12369.JPEG 4
n01795545/n01795545_1237.JPEG 4
n01795545/n01795545_12375.JPEG 4
n01795545/n01795545_12380.JPEG 4
n01795545/n01795545_12385.JPEG 4
n01795545/n01795545_12386.JPEG 4
n01795545/n01795545_12449.JPEG 4
n01795545/n01795545_12466.JPEG 4
n01795545/n01795545_12500.JPEG 4
n01795545/n01795545_12543.JPEG 4
n01795545/n01795545_1255.JPEG 4
n01795545/n01795545_12551.JPEG 4
n01795545/n01795545_12564.JPEG 4
n01795545/n01795545_12567.JPEG 4
n01795545/n01795545_12574.JPEG 4
n01795545/n01795545_12579.JPEG 4
n01795545/n01795545_12610.JPEG 4
n01795545/n01795545_1262.JPEG 4
n01795545/n01795545_12629.JPEG 4
n01795545/n01795545_12631.JPEG 4
n01795545/n01795545_12634.JPEG 4
n01795545/n01795545_12658.JPEG 4
n01795545/n01795545_12667.JPEG 4
n01795545/n01795545_12669.JPEG 4
n01795545/n01795545_1268.JPEG 4
n01795545/n01795545_12690.JPEG 4
n01795545/n01795545_12698.JPEG 4
n01795545/n01795545_12733.JPEG 4
n01795545/n01795545_12757.JPEG 4
n01795545/n01795545_1276.JPEG 4
n01795545/n01795545_12763.JPEG 4
n01795545/n01795545_12783.JPEG 4
n01795545/n01795545_12843.JPEG 4
n01795545/n01795545_12848.JPEG 4
n01795545/n01795545_12850.JPEG 4
n01795545/n01795545_12872.JPEG 4
n01795545/n01795545_12907.JPEG 4
n01795545/n01795545_1294.JPEG 4
n01795545/n01795545_12957.JPEG 4
n01795545/n01795545_12963.JPEG 4
n01795545/n01795545_1297.JPEG 4
n01795545/n01795545_12983.JPEG 4
n01795545/n01795545_12986.JPEG 4
n01795545/n01795545_13005.JPEG 4
n01795545/n01795545_13010.JPEG 4
n01795545/n01795545_13012.JPEG 4
n01795545/n01795545_13013.JPEG 4
n01795545/n01795545_13017.JPEG 4
n01795545/n01795545_13027.JPEG 4
n01795545/n01795545_13030.JPEG 4
n01795545/n01795545_13043.JPEG 4
n01795545/n01795545_13057.JPEG 4
n01795545/n01795545_13064.JPEG 4
n01795545/n01795545_13075.JPEG 4
n01795545/n01795545_1310.JPEG 4
n01795545/n01795545_13105.JPEG 4
n01795545/n01795545_13117.JPEG 4
n01795545/n01795545_13125.JPEG 4
n01795545/n01795545_13167.JPEG 4
n01795545/n01795545_13210.JPEG 4
n01795545/n01795545_13224.JPEG 4
n01795545/n01795545_13255.JPEG 4
n01795545/n01795545_13257.JPEG 4
n01795545/n01795545_13348.JPEG 4
n01795545/n01795545_13367.JPEG 4
n01795545/n01795545_13379.JPEG 4
n01795545/n01795545_13387.JPEG 4
n01795545/n01795545_13392.JPEG 4
n01795545/n01795545_13444.JPEG 4
n01795545/n01795545_13446.JPEG 4
n01795545/n01795545_13451.JPEG 4
n01795545/n01795545_13459.JPEG 4
n01795545/n01795545_13474.JPEG 4
n01795545/n01795545_13499.JPEG 4
n01795545/n01795545_1350.JPEG 4
n01795545/n01795545_13505.JPEG 4
n01795545/n01795545_1355.JPEG 4
n01795545/n01795545_13574.JPEG 4
n01795545/n01795545_13583.JPEG 4
n01795545/n01795545_13595.JPEG 4
n01795545/n01795545_13597.JPEG 4
n01795545/n01795545_1360.JPEG 4
n01795545/n01795545_13611.JPEG 4
n01795545/n01795545_13613.JPEG 4
n01795545/n01795545_1363.JPEG 4
n01795545/n01795545_1367.JPEG 4
n01795545/n01795545_13688.JPEG 4
n01795545/n01795545_1370.JPEG 4
n01795545/n01795545_13713.JPEG 4
n01795545/n01795545_13721.JPEG 4
n01795545/n01795545_13727.JPEG 4
n01795545/n01795545_13765.JPEG 4
n01795545/n01795545_13789.JPEG 4
n01795545/n01795545_13797.JPEG 4
n01795545/n01795545_1380.JPEG 4
n01795545/n01795545_13803.JPEG 4
n01795545/n01795545_13816.JPEG 4
n01795545/n01795545_13820.JPEG 4
n01795545/n01795545_13825.JPEG 4
n01795545/n01795545_13831.JPEG 4
n01795545/n01795545_13835.JPEG 4
n01795545/n01795545_13849.JPEG 4
n01795545/n01795545_13875.JPEG 4
n01795545/n01795545_1390.JPEG 4
n01795545/n01795545_13916.JPEG 4
n01795545/n01795545_13951.JPEG 4
n01795545/n01795545_13974.JPEG 4
n01795545/n01795545_13990.JPEG 4
n01795545/n01795545_14001.JPEG 4
n01795545/n01795545_14009.JPEG 4
n01795545/n01795545_14015.JPEG 4
n01795545/n01795545_1403.JPEG 4
n01795545/n01795545_14058.JPEG 4
n01795545/n01795545_1406.JPEG 4
n01795545/n01795545_14066.JPEG 4
n01795545/n01795545_14080.JPEG 4
n01795545/n01795545_14087.JPEG 4
n01795545/n01795545_14115.JPEG 4
n01795545/n01795545_14142.JPEG 4
n01795545/n01795545_14158.JPEG 4
n01795545/n01795545_14160.JPEG 4
n01795545/n01795545_14177.JPEG 4
n01795545/n01795545_14182.JPEG 4
n01795545/n01795545_14214.JPEG 4
n01795545/n01795545_14217.JPEG 4
n01795545/n01795545_14225.JPEG 4
n01795545/n01795545_14226.JPEG 4
n01795545/n01795545_14259.JPEG 4
n01795545/n01795545_14281.JPEG 4
n01795545/n01795545_14302.JPEG 4
n01795545/n01795545_14358.JPEG 4
n01795545/n01795545_14371.JPEG 4
n01795545/n01795545_14376.JPEG 4
n01795545/n01795545_14392.JPEG 4
n01795545/n01795545_14407.JPEG 4
n01795545/n01795545_14415.JPEG 4
n01795545/n01795545_14434.JPEG 4
n01795545/n01795545_14454.JPEG 4
n01795545/n01795545_14500.JPEG 4
n01795545/n01795545_14503.JPEG 4
n01795545/n01795545_14517.JPEG 4
n01795545/n01795545_14523.JPEG 4
n01795545/n01795545_14528.JPEG 4
n01795545/n01795545_14539.JPEG 4
n01795545/n01795545_14540.JPEG 4
n01795545/n01795545_14591.JPEG 4
n01795545/n01795545_14601.JPEG 4
n01795545/n01795545_14604.JPEG 4
n01795545/n01795545_14616.JPEG 4
n01795545/n01795545_14710.JPEG 4
n01795545/n01795545_14728.JPEG 4
n01795545/n01795545_14747.JPEG 4
n01795545/n01795545_14754.JPEG 4
n01795545/n01795545_14760.JPEG 4
n01795545/n01795545_14765.JPEG 4
n01795545/n01795545_14766.JPEG 4
n01795545/n01795545_14779.JPEG 4
n01795545/n01795545_14786.JPEG 4
n01795545/n01795545_14846.JPEG 4
n01795545/n01795545_14856.JPEG 4
n01795545/n01795545_14857.JPEG 4
n01795545/n01795545_14867.JPEG 4
n01795545/n01795545_14905.JPEG 4
n01795545/n01795545_14934.JPEG 4
n01795545/n01795545_14936.JPEG 4
n01795545/n01795545_1494.JPEG 4
n01795545/n01795545_15007.JPEG 4
n01795545/n01795545_15030.JPEG 4
n01795545/n01795545_15048.JPEG 4
n01795545/n01795545_1506.JPEG 4
n01795545/n01795545_15065.JPEG 4
n01795545/n01795545_15089.JPEG 4
n01795545/n01795545_15095.JPEG 4
n01795545/n01795545_15113.JPEG 4
n01795545/n01795545_1513.JPEG 4
n01795545/n01795545_15135.JPEG 4
n01795545/n01795545_1515.JPEG 4
n01795545/n01795545_15151.JPEG 4
n01795545/n01795545_15159.JPEG 4
n01795545/n01795545_15162.JPEG 4
n01795545/n01795545_1517.JPEG 4
n01795545/n01795545_15179.JPEG 4
n01795545/n01795545_15209.JPEG 4
n01795545/n01795545_15212.JPEG 4
n01795545/n01795545_15213.JPEG 4
n01795545/n01795545_15231.JPEG 4
n01795545/n01795545_15249.JPEG 4
n01795545/n01795545_15255.JPEG 4
n01795545/n01795545_15257.JPEG 4
n01795545/n01795545_15276.JPEG 4
n01795545/n01795545_15278.JPEG 4
n01795545/n01795545_15281.JPEG 4
n01795545/n01795545_15282.JPEG 4
n01795545/n01795545_15288.JPEG 4
n01795545/n01795545_1534.JPEG 4
n01795545/n01795545_1536.JPEG 4
n01795545/n01795545_15360.JPEG 4
n01795545/n01795545_15373.JPEG 4
n01795545/n01795545_15406.JPEG 4
n01795545/n01795545_15414.JPEG 4
n01795545/n01795545_15453.JPEG 4
n01795545/n01795545_15460.JPEG 4
n01795545/n01795545_15499.JPEG 4
n01795545/n01795545_15503.JPEG 4
n01795545/n01795545_15539.JPEG 4
n01795545/n01795545_15541.JPEG 4
n01795545/n01795545_15549.JPEG 4
n01795545/n01795545_156.JPEG 4
n01795545/n01795545_15619.JPEG 4
n01795545/n01795545_15636.JPEG 4
n01795545/n01795545_15662.JPEG 4
n01795545/n01795545_15691.JPEG 4
n01795545/n01795545_15723.JPEG 4
n01795545/n01795545_15737.JPEG 4
n01795545/n01795545_15740.JPEG 4
n01795545/n01795545_15758.JPEG 4
n01795545/n01795545_15812.JPEG 4
n01795545/n01795545_15822.JPEG 4
n01795545/n01795545_15885.JPEG 4
n01795545/n01795545_1589.JPEG 4
n01795545/n01795545_1592.JPEG 4
n01795545/n01795545_15927.JPEG 4
n01795545/n01795545_15938.JPEG 4
n01795545/n01795545_15940.JPEG 4
n01795545/n01795545_15941.JPEG 4
n01795545/n01795545_15993.JPEG 4
n01795545/n01795545_16000.JPEG 4
n01795545/n01795545_16027.JPEG 4
n01795545/n01795545_16037.JPEG 4
n01795545/n01795545_1604.JPEG 4
n01795545/n01795545_16041.JPEG 4
n01795545/n01795545_16052.JPEG 4
n01795545/n01795545_16054.JPEG 4
n01795545/n01795545_1606.JPEG 4
n01795545/n01795545_16068.JPEG 4
n01795545/n01795545_16092.JPEG 4
n01795545/n01795545_16093.JPEG 4
n01795545/n01795545_16117.JPEG 4
n01795545/n01795545_16156.JPEG 4
n01795545/n01795545_1617.JPEG 4
n01795545/n01795545_16179.JPEG 4
n01795545/n01795545_16180.JPEG 4
n01795545/n01795545_16198.JPEG 4
n01795545/n01795545_16200.JPEG 4
n01795545/n01795545_16217.JPEG 4
n01795545/n01795545_16232.JPEG 4
n01795545/n01795545_16238.JPEG 4
n01795545/n01795545_16239.JPEG 4
n01795545/n01795545_16240.JPEG 4
n01795545/n01795545_16280.JPEG 4
n01795545/n01795545_1629.JPEG 4
n01795545/n01795545_163.JPEG 4
n01795545/n01795545_16309.JPEG 4
n01795545/n01795545_16358.JPEG 4
n01795545/n01795545_16362.JPEG 4
n01795545/n01795545_16378.JPEG 4
n01795545/n01795545_16400.JPEG 4
n01795545/n01795545_16402.JPEG 4
n01795545/n01795545_16423.JPEG 4
n01795545/n01795545_16427.JPEG 4
n01795545/n01795545_16439.JPEG 4
n01795545/n01795545_16471.JPEG 4
n01795545/n01795545_16478.JPEG 4
n01795545/n01795545_16492.JPEG 4
n01795545/n01795545_16511.JPEG 4
n01795545/n01795545_16535.JPEG 4
n01795545/n01795545_1654.JPEG 4
n01795545/n01795545_16566.JPEG 4
n01795545/n01795545_16574.JPEG 4
n01795545/n01795545_166.JPEG 4
n01795545/n01795545_16645.JPEG 4
n01795545/n01795545_1665.JPEG 4
n01795545/n01795545_1666.JPEG 4
n01795545/n01795545_16667.JPEG 4
n01795545/n01795545_16684.JPEG 4
n01795545/n01795545_16685.JPEG 4
n01795545/n01795545_16689.JPEG 4
n01795545/n01795545_16701.JPEG 4
n01795545/n01795545_16715.JPEG 4
n01795545/n01795545_16744.JPEG 4
n01795545/n01795545_16752.JPEG 4
n01795545/n01795545_16763.JPEG 4
n01795545/n01795545_16764.JPEG 4
n01795545/n01795545_16778.JPEG 4
n01795545/n01795545_16783.JPEG 4
n01795545/n01795545_16799.JPEG 4
n01795545/n01795545_168.JPEG 4
n01795545/n01795545_16812.JPEG 4
n01795545/n01795545_16816.JPEG 4
n01795545/n01795545_16831.JPEG 4
n01795545/n01795545_16832.JPEG 4
n01795545/n01795545_16875.JPEG 4
n01795545/n01795545_16903.JPEG 4
n01795545/n01795545_16921.JPEG 4
n01795545/n01795545_16940.JPEG 4
n01795545/n01795545_16945.JPEG 4
n01795545/n01795545_16965.JPEG 4
n01795545/n01795545_16990.JPEG 4
n01795545/n01795545_17001.JPEG 4
n01795545/n01795545_17111.JPEG 4
n01795545/n01795545_17114.JPEG 4
n01795545/n01795545_17138.JPEG 4
n01795545/n01795545_1714.JPEG 4
n01795545/n01795545_17151.JPEG 4
n01795545/n01795545_17181.JPEG 4
n01795545/n01795545_1722.JPEG 4
n01795545/n01795545_17220.JPEG 4
n01795545/n01795545_17235.JPEG 4
n01795545/n01795545_17261.JPEG 4
n01795545/n01795545_17269.JPEG 4
n01795545/n01795545_17300.JPEG 4
n01795545/n01795545_17303.JPEG 4
n01795545/n01795545_17311.JPEG 4
n01795545/n01795545_17320.JPEG 4
n01795545/n01795545_17324.JPEG 4
n01795545/n01795545_17326.JPEG 4
n01795545/n01795545_17358.JPEG 4
n01795545/n01795545_1737.JPEG 4
n01795545/n01795545_17385.JPEG 4
n01795545/n01795545_174.JPEG 4
n01795545/n01795545_17402.JPEG 4
n01795545/n01795545_17414.JPEG 4
n01795545/n01795545_17445.JPEG 4
n01795545/n01795545_17456.JPEG 4
n01795545/n01795545_17536.JPEG 4
n01795545/n01795545_17562.JPEG 4
n01795545/n01795545_176.JPEG 4
n01795545/n01795545_17614.JPEG 4
n01795545/n01795545_17618.JPEG 4
n01795545/n01795545_17632.JPEG 4
n01795545/n01795545_17639.JPEG 4
n01795545/n01795545_17667.JPEG 4
n01795545/n01795545_17674.JPEG 4
n01795545/n01795545_1771.JPEG 4
n01795545/n01795545_17710.JPEG 4
n01795545/n01795545_17716.JPEG 4
n01795545/n01795545_17749.JPEG 4
n01795545/n01795545_1776.JPEG 4
n01795545/n01795545_17769.JPEG 4
n01795545/n01795545_17770.JPEG 4
n01795545/n01795545_17790.JPEG 4
n01795545/n01795545_17805.JPEG 4
n01795545/n01795545_17809.JPEG 4
n01795545/n01795545_17822.JPEG 4
n01795545/n01795545_17825.JPEG 4
n01795545/n01795545_17832.JPEG 4
n01795545/n01795545_17835.JPEG 4
n01795545/n01795545_17836.JPEG 4
n01795545/n01795545_17838.JPEG 4
n01795545/n01795545_17840.JPEG 4
n01795545/n01795545_17884.JPEG 4
n01795545/n01795545_17887.JPEG 4
n01795545/n01795545_17933.JPEG 4
n01795545/n01795545_17959.JPEG 4
n01795545/n01795545_17976.JPEG 4
n01795545/n01795545_17986.JPEG 4
n01795545/n01795545_17987.JPEG 4
n01795545/n01795545_17990.JPEG 4
n01795545/n01795545_1802.JPEG 4
n01795545/n01795545_18030.JPEG 4
n01795545/n01795545_1804.JPEG 4
n01795545/n01795545_18059.JPEG 4
n01795545/n01795545_18078.JPEG 4
n01795545/n01795545_18080.JPEG 4
n01795545/n01795545_18104.JPEG 4
n01795545/n01795545_18105.JPEG 4
n01795545/n01795545_18118.JPEG 4
n01795545/n01795545_18163.JPEG 4
n01795545/n01795545_18222.JPEG 4
n01795545/n01795545_18250.JPEG 4
n01795545/n01795545_18265.JPEG 4
n01795545/n01795545_18271.JPEG 4
n01795545/n01795545_18273.JPEG 4
n01795545/n01795545_18278.JPEG 4
n01795545/n01795545_18300.JPEG 4
n01795545/n01795545_18311.JPEG 4
n01795545/n01795545_18312.JPEG 4
n01795545/n01795545_18350.JPEG 4
n01795545/n01795545_18362.JPEG 4
n01795545/n01795545_18376.JPEG 4
n01795545/n01795545_18406.JPEG 4
n01795545/n01795545_18407.JPEG 4
n01795545/n01795545_18448.JPEG 4
n01795545/n01795545_18481.JPEG 4
n01795545/n01795545_18486.JPEG 4
n01795545/n01795545_1849.JPEG 4
n01795545/n01795545_18499.JPEG 4
n01795545/n01795545_18514.JPEG 4
n01795545/n01795545_18518.JPEG 4
n01795545/n01795545_1852.JPEG 4
n01795545/n01795545_18527.JPEG 4
n01795545/n01795545_18532.JPEG 4
n01795545/n01795545_18535.JPEG 4
n01795545/n01795545_18539.JPEG 4
n01795545/n01795545_18543.JPEG 4
n01795545/n01795545_18547.JPEG 4
n01795545/n01795545_18552.JPEG 4
n01795545/n01795545_1857.JPEG 4
n01795545/n01795545_186.JPEG 4
n01795545/n01795545_18600.JPEG 4
n01795545/n01795545_18662.JPEG 4
n01795545/n01795545_18728.JPEG 4
n01795545/n01795545_1873.JPEG 4
n01795545/n01795545_18733.JPEG 4
n01795545/n01795545_18743.JPEG 4
n01795545/n01795545_18758.JPEG 4
n01795545/n01795545_18775.JPEG 4
n01795545/n01795545_18820.JPEG 4
n01795545/n01795545_18829.JPEG 4
n01795545/n01795545_18848.JPEG 4
n01795545/n01795545_18862.JPEG 4
n01795545/n01795545_18887.JPEG 4
n01795545/n01795545_18900.JPEG 4
n01795545/n01795545_18914.JPEG 4
n01795545/n01795545_18919.JPEG 4
n01795545/n01795545_18950.JPEG 4
n01795545/n01795545_18972.JPEG 4
n01795545/n01795545_19.JPEG 4
n01795545/n01795545_19007.JPEG 4
n01795545/n01795545_1902.JPEG 4
n01795545/n01795545_19026.JPEG 4
n01795545/n01795545_1912.JPEG 4
n01795545/n01795545_1918.JPEG 4
n01795545/n01795545_1928.JPEG 4
n01795545/n01795545_1945.JPEG 4
n01795545/n01795545_1949.JPEG 4
n01795545/n01795545_1983.JPEG 4
n01795545/n01795545_20.JPEG 4
n01795545/n01795545_2008.JPEG 4
n01795545/n01795545_202.JPEG 4
n01795545/n01795545_2021.JPEG 4
n01795545/n01795545_2025.JPEG 4
n01795545/n01795545_2028.JPEG 4
n01795545/n01795545_2030.JPEG 4
n01795545/n01795545_206.JPEG 4
n01795545/n01795545_2075.JPEG 4
n01795545/n01795545_2121.JPEG 4
n01795545/n01795545_2138.JPEG 4
n01795545/n01795545_2145.JPEG 4
n01795545/n01795545_2149.JPEG 4
n01795545/n01795545_2158.JPEG 4
n01795545/n01795545_2169.JPEG 4
n01795545/n01795545_2208.JPEG 4
n01795545/n01795545_2219.JPEG 4
n01795545/n01795545_2228.JPEG 4
n01795545/n01795545_2232.JPEG 4
n01795545/n01795545_2237.JPEG 4
n01795545/n01795545_2250.JPEG 4
n01795545/n01795545_2259.JPEG 4
n01795545/n01795545_2263.JPEG 4
n01795545/n01795545_2264.JPEG 4
n01795545/n01795545_2265.JPEG 4
n01795545/n01795545_227.JPEG 4
n01795545/n01795545_2287.JPEG 4
n01795545/n01795545_229.JPEG 4
n01795545/n01795545_230.JPEG 4
n01795545/n01795545_2300.JPEG 4
n01795545/n01795545_2303.JPEG 4
n01795545/n01795545_232.JPEG 4
n01795545/n01795545_2323.JPEG 4
n01795545/n01795545_2350.JPEG 4
n01795545/n01795545_2357.JPEG 4
n01795545/n01795545_24.JPEG 4
n01795545/n01795545_2407.JPEG 4
n01795545/n01795545_2410.JPEG 4
n01795545/n01795545_2438.JPEG 4
n01795545/n01795545_2443.JPEG 4
n01795545/n01795545_2472.JPEG 4
n01795545/n01795545_2479.JPEG 4
n01795545/n01795545_2497.JPEG 4
n01795545/n01795545_2499.JPEG 4
n01795545/n01795545_2508.JPEG 4
n01795545/n01795545_252.JPEG 4
n01795545/n01795545_2525.JPEG 4
n01795545/n01795545_2537.JPEG 4
n01795545/n01795545_2541.JPEG 4
n01795545/n01795545_2574.JPEG 4
n01795545/n01795545_2575.JPEG 4
n01795545/n01795545_2578.JPEG 4
n01795545/n01795545_2584.JPEG 4
n01795545/n01795545_2593.JPEG 4
n01795545/n01795545_2616.JPEG 4
n01795545/n01795545_2617.JPEG 4
n01795545/n01795545_2632.JPEG 4
n01795545/n01795545_2658.JPEG 4
n01795545/n01795545_2664.JPEG 4
n01795545/n01795545_2665.JPEG 4
n01795545/n01795545_2669.JPEG 4
n01795545/n01795545_2672.JPEG 4
n01795545/n01795545_2681.JPEG 4
n01795545/n01795545_2689.JPEG 4
n01795545/n01795545_2690.JPEG 4
n01795545/n01795545_2712.JPEG 4
n01795545/n01795545_2724.JPEG 4
n01795545/n01795545_2730.JPEG 4
n01795545/n01795545_2736.JPEG 4
n01795545/n01795545_2753.JPEG 4
n01795545/n01795545_2770.JPEG 4
n01795545/n01795545_2772.JPEG 4
n01795545/n01795545_2809.JPEG 4
n01795545/n01795545_2824.JPEG 4
n01795545/n01795545_2828.JPEG 4
n01795545/n01795545_2829.JPEG 4
n01795545/n01795545_2851.JPEG 4
n01795545/n01795545_286.JPEG 4
n01795545/n01795545_2870.JPEG 4
n01795545/n01795545_2879.JPEG 4
n01795545/n01795545_2891.JPEG 4
n01795545/n01795545_2896.JPEG 4
n01795545/n01795545_2900.JPEG 4
n01795545/n01795545_2908.JPEG 4
n01795545/n01795545_2909.JPEG 4
n01795545/n01795545_2914.JPEG 4
n01795545/n01795545_2924.JPEG 4
n01795545/n01795545_2947.JPEG 4
n01795545/n01795545_295.JPEG 4
n01795545/n01795545_2950.JPEG 4
n01795545/n01795545_2953.JPEG 4
n01795545/n01795545_2964.JPEG 4
n01795545/n01795545_2967.JPEG 4
n01795545/n01795545_302.JPEG 4
n01795545/n01795545_3052.JPEG 4
n01795545/n01795545_3063.JPEG 4
n01795545/n01795545_307.JPEG 4
n01795545/n01795545_3076.JPEG 4
n01795545/n01795545_3090.JPEG 4
n01795545/n01795545_3098.JPEG 4
n01795545/n01795545_3108.JPEG 4
n01795545/n01795545_3112.JPEG 4
n01795545/n01795545_3117.JPEG 4
n01795545/n01795545_3120.JPEG 4
n01795545/n01795545_3143.JPEG 4
n01795545/n01795545_3150.JPEG 4
n01795545/n01795545_3151.JPEG 4
n01795545/n01795545_3155.JPEG 4
n01795545/n01795545_3162.JPEG 4
n01795545/n01795545_317.JPEG 4
n01795545/n01795545_3180.JPEG 4
n01795545/n01795545_3182.JPEG 4
n01795545/n01795545_3187.JPEG 4
n01795545/n01795545_3207.JPEG 4
n01795545/n01795545_3247.JPEG 4
n01795545/n01795545_3248.JPEG 4
n01795545/n01795545_3249.JPEG 4
n01795545/n01795545_3250.JPEG 4
n01795545/n01795545_3264.JPEG 4
n01795545/n01795545_3272.JPEG 4
n01795545/n01795545_3274.JPEG 4
n01795545/n01795545_3279.JPEG 4
n01795545/n01795545_3315.JPEG 4
n01795545/n01795545_3321.JPEG 4
n01795545/n01795545_3323.JPEG 4
n01795545/n01795545_3327.JPEG 4
n01795545/n01795545_3331.JPEG 4
n01795545/n01795545_3347.JPEG 4
n01795545/n01795545_3352.JPEG 4
n01795545/n01795545_3368.JPEG 4
n01795545/n01795545_3372.JPEG 4
n01795545/n01795545_338.JPEG 4
n01795545/n01795545_3386.JPEG 4
n01795545/n01795545_3395.JPEG 4
n01795545/n01795545_3400.JPEG 4
n01795545/n01795545_3413.JPEG 4
n01795545/n01795545_3433.JPEG 4
n01795545/n01795545_3444.JPEG 4
n01795545/n01795545_3470.JPEG 4
n01795545/n01795545_3471.JPEG 4
n01795545/n01795545_3488.JPEG 4
n01795545/n01795545_3496.JPEG 4
n01795545/n01795545_3519.JPEG 4
n01795545/n01795545_352.JPEG 4
n01795545/n01795545_3529.JPEG 4
n01795545/n01795545_3530.JPEG 4
n01795545/n01795545_3542.JPEG 4
n01795545/n01795545_3544.JPEG 4
n01795545/n01795545_3546.JPEG 4
n01795545/n01795545_3552.JPEG 4
n01795545/n01795545_3558.JPEG 4
n01795545/n01795545_3560.JPEG 4
n01795545/n01795545_3565.JPEG 4
n01795545/n01795545_3605.JPEG 4
n01795545/n01795545_3617.JPEG 4
n01795545/n01795545_3620.JPEG 4
n01795545/n01795545_3638.JPEG 4
n01795545/n01795545_3646.JPEG 4
n01795545/n01795545_3655.JPEG 4
n01795545/n01795545_3660.JPEG 4
n01795545/n01795545_3670.JPEG 4
n01795545/n01795545_3690.JPEG 4
n01795545/n01795545_3694.JPEG 4
n01795545/n01795545_3697.JPEG 4
n01795545/n01795545_3700.JPEG 4
n01795545/n01795545_3713.JPEG 4
n01795545/n01795545_3726.JPEG 4
n01795545/n01795545_373.JPEG 4
n01795545/n01795545_3732.JPEG 4
n01795545/n01795545_374.JPEG 4
n01795545/n01795545_3744.JPEG 4
n01795545/n01795545_3792.JPEG 4
n01795545/n01795545_3799.JPEG 4
n01795545/n01795545_3816.JPEG 4
n01795545/n01795545_3849.JPEG 4
n01795545/n01795545_3854.JPEG 4
n01795545/n01795545_3856.JPEG 4
n01795545/n01795545_3867.JPEG 4
n01795545/n01795545_3873.JPEG 4
n01795545/n01795545_3875.JPEG 4
n01795545/n01795545_3878.JPEG 4
n01795545/n01795545_3879.JPEG 4
n01795545/n01795545_388.JPEG 4
n01795545/n01795545_3880.JPEG 4
n01795545/n01795545_3885.JPEG 4
n01795545/n01795545_3887.JPEG 4
n01795545/n01795545_3888.JPEG 4
n01795545/n01795545_3897.JPEG 4
n01795545/n01795545_3900.JPEG 4
n01795545/n01795545_3904.JPEG 4
n01795545/n01795545_3914.JPEG 4
n01795545/n01795545_3915.JPEG 4
n01795545/n01795545_3955.JPEG 4
n01795545/n01795545_3958.JPEG 4
n01795545/n01795545_3970.JPEG 4
n01795545/n01795545_3979.JPEG 4
n01795545/n01795545_3987.JPEG 4
n01795545/n01795545_399.JPEG 4
n01795545/n01795545_3991.JPEG 4
n01795545/n01795545_3992.JPEG 4
n01795545/n01795545_3995.JPEG 4
n01795545/n01795545_4010.JPEG 4
n01795545/n01795545_4030.JPEG 4
n01795545/n01795545_4032.JPEG 4
n01795545/n01795545_4036.JPEG 4
n01795545/n01795545_4077.JPEG 4
n01795545/n01795545_4091.JPEG 4
n01795545/n01795545_4093.JPEG 4
n01795545/n01795545_4094.JPEG 4
n01795545/n01795545_4105.JPEG 4
n01795545/n01795545_4120.JPEG 4
n01795545/n01795545_4121.JPEG 4
n01795545/n01795545_4125.JPEG 4
n01795545/n01795545_4133.JPEG 4
n01795545/n01795545_4146.JPEG 4
n01795545/n01795545_4189.JPEG 4
n01795545/n01795545_42.JPEG 4
n01795545/n01795545_4228.JPEG 4
n01795545/n01795545_4243.JPEG 4
n01795545/n01795545_4248.JPEG 4
n01795545/n01795545_4254.JPEG 4
n01795545/n01795545_4255.JPEG 4
n01795545/n01795545_4264.JPEG 4
n01795545/n01795545_4288.JPEG 4
n01795545/n01795545_4293.JPEG 4
n01795545/n01795545_4296.JPEG 4
n01795545/n01795545_4304.JPEG 4
n01795545/n01795545_4328.JPEG 4
n01795545/n01795545_4339.JPEG 4
n01795545/n01795545_4356.JPEG 4
n01795545/n01795545_4396.JPEG 4
n01795545/n01795545_4403.JPEG 4
n01795545/n01795545_4411.JPEG 4
n01795545/n01795545_4417.JPEG 4
n01795545/n01795545_4418.JPEG 4
n01795545/n01795545_443.JPEG 4
n01795545/n01795545_4438.JPEG 4
n01795545/n01795545_448.JPEG 4
n01795545/n01795545_4487.JPEG 4
n01795545/n01795545_4490.JPEG 4
n01795545/n01795545_4502.JPEG 4
n01795545/n01795545_4504.JPEG 4
n01795545/n01795545_4506.JPEG 4
n01795545/n01795545_4524.JPEG 4
n01795545/n01795545_4557.JPEG 4
n01795545/n01795545_4563.JPEG 4
n01795545/n01795545_4567.JPEG 4
n01795545/n01795545_4575.JPEG 4
n01795545/n01795545_4585.JPEG 4
n01795545/n01795545_4597.JPEG 4
n01795545/n01795545_4598.JPEG 4
n01795545/n01795545_4600.JPEG 4
n01795545/n01795545_4614.JPEG 4
n01795545/n01795545_4640.JPEG 4
n01795545/n01795545_4649.JPEG 4
n01795545/n01795545_4652.JPEG 4
n01795545/n01795545_4661.JPEG 4
n01795545/n01795545_4695.JPEG 4
n01795545/n01795545_4701.JPEG 4
n01795545/n01795545_4706.JPEG 4
n01795545/n01795545_4709.JPEG 4
n01795545/n01795545_4710.JPEG 4
n01795545/n01795545_4743.JPEG 4
n01795545/n01795545_4755.JPEG 4
n01795545/n01795545_4767.JPEG 4
n01795545/n01795545_4788.JPEG 4
n01795545/n01795545_4800.JPEG 4
n01795545/n01795545_4804.JPEG 4
n01795545/n01795545_4868.JPEG 4
n01795545/n01795545_4871.JPEG 4
n01795545/n01795545_4886.JPEG 4
n01795545/n01795545_4892.JPEG 4
n01795545/n01795545_4894.JPEG 4
n01795545/n01795545_4916.JPEG 4
n01795545/n01795545_4919.JPEG 4
n01795545/n01795545_4938.JPEG 4
n01795545/n01795545_494.JPEG 4
n01795545/n01795545_4941.JPEG 4
n01795545/n01795545_4944.JPEG 4
n01795545/n01795545_497.JPEG 4
n01795545/n01795545_4983.JPEG 4
n01795545/n01795545_4988.JPEG 4
n01795545/n01795545_50.JPEG 4
n01795545/n01795545_503.JPEG 4
n01795545/n01795545_5044.JPEG 4
n01795545/n01795545_5065.JPEG 4
n01795545/n01795545_5076.JPEG 4
n01795545/n01795545_5085.JPEG 4
n01795545/n01795545_511.JPEG 4
n01795545/n01795545_5118.JPEG 4
n01795545/n01795545_514.JPEG 4
n01795545/n01795545_5146.JPEG 4
n01795545/n01795545_5236.JPEG 4
n01795545/n01795545_5251.JPEG 4
n01795545/n01795545_5253.JPEG 4
n01795545/n01795545_5257.JPEG 4
n01795545/n01795545_5274.JPEG 4
n01795545/n01795545_5275.JPEG 4
n01795545/n01795545_5278.JPEG 4
n01795545/n01795545_5281.JPEG 4
n01795545/n01795545_5293.JPEG 4
n01795545/n01795545_5294.JPEG 4
n01795545/n01795545_5296.JPEG 4
n01795545/n01795545_5310.JPEG 4
n01795545/n01795545_5316.JPEG 4
n01795545/n01795545_5328.JPEG 4
n01795545/n01795545_5340.JPEG 4
n01795545/n01795545_535.JPEG 4
n01795545/n01795545_5354.JPEG 4
n01795545/n01795545_5364.JPEG 4
n01795545/n01795545_5368.JPEG 4
n01795545/n01795545_5378.JPEG 4
n01795545/n01795545_5384.JPEG 4
n01795545/n01795545_5395.JPEG 4
n01795545/n01795545_54.JPEG 4
n01795545/n01795545_5409.JPEG 4
n01795545/n01795545_5420.JPEG 4
n01795545/n01795545_5422.JPEG 4
n01795545/n01795545_5424.JPEG 4
n01795545/n01795545_5470.JPEG 4
n01795545/n01795545_5475.JPEG 4
n01795545/n01795545_5487.JPEG 4
n01795545/n01795545_5493.JPEG 4
n01795545/n01795545_5502.JPEG 4
n01795545/n01795545_5504.JPEG 4
n01795545/n01795545_5510.JPEG 4
n01795545/n01795545_5511.JPEG 4
n01795545/n01795545_5532.JPEG 4
n01795545/n01795545_5543.JPEG 4
n01795545/n01795545_5545.JPEG 4
n01795545/n01795545_5558.JPEG 4
n01795545/n01795545_5565.JPEG 4
n01795545/n01795545_5574.JPEG 4
n01795545/n01795545_5578.JPEG 4
n01795545/n01795545_5582.JPEG 4
n01795545/n01795545_5583.JPEG 4
n01795545/n01795545_5594.JPEG 4
n01795545/n01795545_5605.JPEG 4
n01795545/n01795545_5614.JPEG 4
n01795545/n01795545_5617.JPEG 4
n01795545/n01795545_5623.JPEG 4
n01795545/n01795545_5632.JPEG 4
n01795545/n01795545_564.JPEG 4
n01795545/n01795545_5643.JPEG 4
n01795545/n01795545_565.JPEG 4
n01795545/n01795545_5651.JPEG 4
n01795545/n01795545_567.JPEG 4
n01795545/n01795545_5675.JPEG 4
n01795545/n01795545_5677.JPEG 4
n01795545/n01795545_5681.JPEG 4
n01795545/n01795545_5696.JPEG 4
n01795545/n01795545_5701.JPEG 4
n01795545/n01795545_5709.JPEG 4
n01795545/n01795545_5713.JPEG 4
n01795545/n01795545_5715.JPEG 4
n01795545/n01795545_5721.JPEG 4
n01795545/n01795545_5723.JPEG 4
n01795545/n01795545_5731.JPEG 4
n01795545/n01795545_5740.JPEG 4
n01795545/n01795545_5745.JPEG 4
n01795545/n01795545_5747.JPEG 4
n01795545/n01795545_5751.JPEG 4
n01795545/n01795545_5755.JPEG 4
n01795545/n01795545_5759.JPEG 4
n01795545/n01795545_5776.JPEG 4
n01795545/n01795545_5783.JPEG 4
n01795545/n01795545_5809.JPEG 4
n01795545/n01795545_5811.JPEG 4
n01795545/n01795545_5816.JPEG 4
n01795545/n01795545_5822.JPEG 4
n01795545/n01795545_5823.JPEG 4
n01795545/n01795545_5828.JPEG 4
n01795545/n01795545_5829.JPEG 4
n01795545/n01795545_5832.JPEG 4
n01795545/n01795545_5839.JPEG 4
n01795545/n01795545_5846.JPEG 4
n01795545/n01795545_5847.JPEG 4
n01795545/n01795545_5855.JPEG 4
n01795545/n01795545_5867.JPEG 4
n01795545/n01795545_587.JPEG 4
n01795545/n01795545_5877.JPEG 4
n01795545/n01795545_5878.JPEG 4
n01795545/n01795545_5887.JPEG 4
n01795545/n01795545_5890.JPEG 4
n01795545/n01795545_5891.JPEG 4
n01795545/n01795545_59.JPEG 4
n01795545/n01795545_5903.JPEG 4
n01795545/n01795545_5910.JPEG 4
n01795545/n01795545_5918.JPEG 4
n01795545/n01795545_5941.JPEG 4
n01795545/n01795545_5944.JPEG 4
n01795545/n01795545_5946.JPEG 4
n01795545/n01795545_5952.JPEG 4
n01795545/n01795545_5962.JPEG 4
n01795545/n01795545_5967.JPEG 4
n01795545/n01795545_5972.JPEG 4
n01795545/n01795545_5980.JPEG 4
n01795545/n01795545_5983.JPEG 4
n01795545/n01795545_5987.JPEG 4
n01795545/n01795545_5996.JPEG 4
n01795545/n01795545_5997.JPEG 4
n01795545/n01795545_6006.JPEG 4
n01795545/n01795545_6008.JPEG 4
n01795545/n01795545_6010.JPEG 4
n01795545/n01795545_6044.JPEG 4
n01795545/n01795545_6050.JPEG 4
n01795545/n01795545_6051.JPEG 4
n01795545/n01795545_6055.JPEG 4
n01795545/n01795545_6057.JPEG 4
n01795545/n01795545_6066.JPEG 4
n01795545/n01795545_6069.JPEG 4
n01795545/n01795545_6072.JPEG 4
n01795545/n01795545_6074.JPEG 4
n01795545/n01795545_6075.JPEG 4
n01795545/n01795545_6082.JPEG 4
n01795545/n01795545_6084.JPEG 4
n01795545/n01795545_6086.JPEG 4
n01795545/n01795545_6093.JPEG 4
n01795545/n01795545_61.JPEG 4
n01795545/n01795545_6108.JPEG 4
n01795545/n01795545_6114.JPEG 4
n01795545/n01795545_6136.JPEG 4
n01795545/n01795545_6152.JPEG 4
n01795545/n01795545_6168.JPEG 4
n01795545/n01795545_6175.JPEG 4
n01795545/n01795545_6181.JPEG 4
n01795545/n01795545_6182.JPEG 4
n01795545/n01795545_6192.JPEG 4
n01795545/n01795545_6211.JPEG 4
n01795545/n01795545_6217.JPEG 4
n01795545/n01795545_6243.JPEG 4
n01795545/n01795545_6246.JPEG 4
n01795545/n01795545_6253.JPEG 4
n01795545/n01795545_6256.JPEG 4
n01795545/n01795545_6258.JPEG 4
n01795545/n01795545_6259.JPEG 4
n01795545/n01795545_6262.JPEG 4
n01795545/n01795545_6268.JPEG 4
n01795545/n01795545_6289.JPEG 4
n01795545/n01795545_6290.JPEG 4
n01795545/n01795545_6296.JPEG 4
n01795545/n01795545_6316.JPEG 4
n01795545/n01795545_6320.JPEG 4
n01795545/n01795545_633.JPEG 4
n01795545/n01795545_6335.JPEG 4
n01795545/n01795545_6337.JPEG 4
n01795545/n01795545_6338.JPEG 4
n01795545/n01795545_6350.JPEG 4
n01795545/n01795545_6357.JPEG 4
n01795545/n01795545_6370.JPEG 4
n01795545/n01795545_6374.JPEG 4
n01795545/n01795545_6382.JPEG 4
n01795545/n01795545_639.JPEG 4
n01795545/n01795545_6391.JPEG 4
n01795545/n01795545_6392.JPEG 4
n01795545/n01795545_6403.JPEG 4
n01795545/n01795545_641.JPEG 4
n01795545/n01795545_6412.JPEG 4
n01795545/n01795545_6413.JPEG 4
n01795545/n01795545_6415.JPEG 4
n01795545/n01795545_6435.JPEG 4
n01795545/n01795545_6438.JPEG 4
n01795545/n01795545_6449.JPEG 4
n01795545/n01795545_6453.JPEG 4
n01795545/n01795545_6454.JPEG 4
n01795545/n01795545_6457.JPEG 4
n01795545/n01795545_647.JPEG 4
n01795545/n01795545_6470.JPEG 4
n01795545/n01795545_6481.JPEG 4
n01795545/n01795545_6485.JPEG 4
n01795545/n01795545_6499.JPEG 4
n01795545/n01795545_6502.JPEG 4
n01795545/n01795545_6503.JPEG 4
n01795545/n01795545_6526.JPEG 4
n01795545/n01795545_6531.JPEG 4
n01795545/n01795545_6537.JPEG 4
n01795545/n01795545_6542.JPEG 4
n01795545/n01795545_6549.JPEG 4
n01795545/n01795545_6557.JPEG 4
n01795545/n01795545_6559.JPEG 4
n01795545/n01795545_6561.JPEG 4
n01795545/n01795545_6566.JPEG 4
n01795545/n01795545_6572.JPEG 4
n01795545/n01795545_6580.JPEG 4
n01795545/n01795545_6584.JPEG 4
n01795545/n01795545_6586.JPEG 4
n01795545/n01795545_6590.JPEG 4
n01795545/n01795545_6608.JPEG 4
n01795545/n01795545_6613.JPEG 4
n01795545/n01795545_6622.JPEG 4
n01795545/n01795545_6633.JPEG 4
n01795545/n01795545_6640.JPEG 4
n01795545/n01795545_6646.JPEG 4
n01795545/n01795545_6656.JPEG 4
n01795545/n01795545_6659.JPEG 4
n01795545/n01795545_6661.JPEG 4
n01795545/n01795545_6662.JPEG 4
n01795545/n01795545_6665.JPEG 4
n01795545/n01795545_6666.JPEG 4
n01795545/n01795545_6673.JPEG 4
n01795545/n01795545_6680.JPEG 4
n01795545/n01795545_6681.JPEG 4
n01795545/n01795545_669.JPEG 4
n01795545/n01795545_6692.JPEG 4
n01795545/n01795545_67.JPEG 4
n01795545/n01795545_670.JPEG 4
n01795545/n01795545_6701.JPEG 4
n01795545/n01795545_6702.JPEG 4
n01795545/n01795545_6703.JPEG 4
n01795545/n01795545_6709.JPEG 4
n01795545/n01795545_6711.JPEG 4
n01795545/n01795545_6716.JPEG 4
n01795545/n01795545_6718.JPEG 4
n01795545/n01795545_6728.JPEG 4
n01795545/n01795545_6743.JPEG 4
n01795545/n01795545_6771.JPEG 4
n01795545/n01795545_6773.JPEG 4
n01795545/n01795545_6783.JPEG 4
n01795545/n01795545_6787.JPEG 4
n01795545/n01795545_6789.JPEG 4
n01795545/n01795545_6791.JPEG 4
n01795545/n01795545_6803.JPEG 4
n01795545/n01795545_6804.JPEG 4
n01795545/n01795545_6805.JPEG 4
n01795545/n01795545_6808.JPEG 4
n01795545/n01795545_6809.JPEG 4
n01795545/n01795545_6811.JPEG 4
n01795545/n01795545_6813.JPEG 4
n01795545/n01795545_6815.JPEG 4
n01795545/n01795545_6820.JPEG 4
n01795545/n01795545_6823.JPEG 4
n01795545/n01795545_6838.JPEG 4
n01795545/n01795545_6843.JPEG 4
n01795545/n01795545_6853.JPEG 4
n01795545/n01795545_6854.JPEG 4
n01795545/n01795545_6856.JPEG 4
n01795545/n01795545_6857.JPEG 4
n01795545/n01795545_6865.JPEG 4
n01795545/n01795545_6874.JPEG 4
n01795545/n01795545_6880.JPEG 4
n01795545/n01795545_6885.JPEG 4
n01795545/n01795545_6892.JPEG 4
n01795545/n01795545_6896.JPEG 4
n01795545/n01795545_6897.JPEG 4
n01795545/n01795545_6898.JPEG 4
n01795545/n01795545_6909.JPEG 4
n01795545/n01795545_6914.JPEG 4
n01795545/n01795545_692.JPEG 4
n01795545/n01795545_6925.JPEG 4
n01795545/n01795545_6927.JPEG 4
n01795545/n01795545_6928.JPEG 4
n01795545/n01795545_6930.JPEG 4
n01795545/n01795545_6931.JPEG 4
n01795545/n01795545_6936.JPEG 4
n01795545/n01795545_6951.JPEG 4
n01795545/n01795545_6974.JPEG 4
n01795545/n01795545_7006.JPEG 4
n01795545/n01795545_7036.JPEG 4
n01795545/n01795545_7039.JPEG 4
n01795545/n01795545_705.JPEG 4
n01795545/n01795545_7056.JPEG 4
n01795545/n01795545_708.JPEG 4
n01795545/n01795545_7082.JPEG 4
n01795545/n01795545_7102.JPEG 4
n01795545/n01795545_7118.JPEG 4
n01795545/n01795545_7142.JPEG 4
n01795545/n01795545_717.JPEG 4
n01795545/n01795545_7172.JPEG 4
n01795545/n01795545_7177.JPEG 4
n01795545/n01795545_7232.JPEG 4
n01795545/n01795545_7265.JPEG 4
n01795545/n01795545_7294.JPEG 4
n01795545/n01795545_7361.JPEG 4
n01795545/n01795545_7423.JPEG 4
n01795545/n01795545_7436.JPEG 4
n01795545/n01795545_7460.JPEG 4
n01795545/n01795545_7474.JPEG 4
n01795545/n01795545_7518.JPEG 4
n01795545/n01795545_7522.JPEG 4
n01795545/n01795545_7537.JPEG 4
n01795545/n01795545_7545.JPEG 4
n01795545/n01795545_756.JPEG 4
n01795545/n01795545_7570.JPEG 4
n01795545/n01795545_7606.JPEG 4
n01795545/n01795545_7616.JPEG 4
n01795545/n01795545_7642.JPEG 4
n01795545/n01795545_7647.JPEG 4
n01795545/n01795545_7669.JPEG 4
n01795545/n01795545_7677.JPEG 4
n01795545/n01795545_7690.JPEG 4
n01795545/n01795545_7699.JPEG 4
n01795545/n01795545_773.JPEG 4
n01795545/n01795545_7780.JPEG 4
n01795545/n01795545_7813.JPEG 4
n01795545/n01795545_787.JPEG 4
n01795545/n01795545_7885.JPEG 4
n01795545/n01795545_7895.JPEG 4
n01795545/n01795545_7900.JPEG 4
n01795545/n01795545_792.JPEG 4
n01795545/n01795545_7924.JPEG 4
n01795545/n01795545_7929.JPEG 4
n01795545/n01795545_7937.JPEG 4
n01795545/n01795545_795.JPEG 4
n01795545/n01795545_7963.JPEG 4
n01795545/n01795545_7999.JPEG 4
n01795545/n01795545_8009.JPEG 4
n01795545/n01795545_8020.JPEG 4
n01795545/n01795545_8036.JPEG 4
n01795545/n01795545_8048.JPEG 4
n01795545/n01795545_8053.JPEG 4
n01795545/n01795545_8054.JPEG 4
n01795545/n01795545_8057.JPEG 4
n01795545/n01795545_81.JPEG 4
n01795545/n01795545_8112.JPEG 4
n01795545/n01795545_8123.JPEG 4
n01795545/n01795545_8158.JPEG 4
n01795545/n01795545_8162.JPEG 4
n01795545/n01795545_8186.JPEG 4
n01795545/n01795545_820.JPEG 4
n01795545/n01795545_8230.JPEG 4
n01795545/n01795545_8258.JPEG 4
n01795545/n01795545_828.JPEG 4
n01795545/n01795545_8323.JPEG 4
n01795545/n01795545_8325.JPEG 4
n01795545/n01795545_8332.JPEG 4
n01795545/n01795545_8361.JPEG 4
n01795545/n01795545_8370.JPEG 4
n01795545/n01795545_838.JPEG 4
n01795545/n01795545_8395.JPEG 4
n01795545/n01795545_84.JPEG 4
n01795545/n01795545_8419.JPEG 4
n01795545/n01795545_842.JPEG 4
n01795545/n01795545_8422.JPEG 4
n01795545/n01795545_843.JPEG 4
n01795545/n01795545_8432.JPEG 4
n01795545/n01795545_8440.JPEG 4
n01795545/n01795545_8441.JPEG 4
n01795545/n01795545_8456.JPEG 4
n01795545/n01795545_8506.JPEG 4
n01795545/n01795545_8518.JPEG 4
n01795545/n01795545_8524.JPEG 4
n01795545/n01795545_8531.JPEG 4
n01795545/n01795545_8553.JPEG 4
n01795545/n01795545_8582.JPEG 4
n01795545/n01795545_8605.JPEG 4
n01795545/n01795545_861.JPEG 4
n01795545/n01795545_8611.JPEG 4
n01795545/n01795545_8614.JPEG 4
n01795545/n01795545_8620.JPEG 4
n01795545/n01795545_8689.JPEG 4
n01795545/n01795545_8693.JPEG 4
n01795545/n01795545_8701.JPEG 4
n01795545/n01795545_8712.JPEG 4
n01795545/n01795545_8735.JPEG 4
n01795545/n01795545_8737.JPEG 4
n01795545/n01795545_8745.JPEG 4
n01795545/n01795545_8767.JPEG 4
n01795545/n01795545_8771.JPEG 4
n01795545/n01795545_8803.JPEG 4
n01795545/n01795545_8838.JPEG 4
n01795545/n01795545_8839.JPEG 4
n01795545/n01795545_8848.JPEG 4
n01795545/n01795545_8871.JPEG 4
n01795545/n01795545_8879.JPEG 4
n01795545/n01795545_8900.JPEG 4
n01795545/n01795545_891.JPEG 4
n01795545/n01795545_8913.JPEG 4
n01795545/n01795545_897.JPEG 4
n01795545/n01795545_8970.JPEG 4
n01795545/n01795545_9007.JPEG 4
n01795545/n01795545_9011.JPEG 4
n01795545/n01795545_9043.JPEG 4
n01795545/n01795545_9058.JPEG 4
n01795545/n01795545_9121.JPEG 4
n01795545/n01795545_9171.JPEG 4
n01795545/n01795545_9181.JPEG 4
n01795545/n01795545_9195.JPEG 4
n01795545/n01795545_9202.JPEG 4
n01795545/n01795545_922.JPEG 4
n01795545/n01795545_924.JPEG 4
n01795545/n01795545_9269.JPEG 4
n01795545/n01795545_9272.JPEG 4
n01795545/n01795545_9283.JPEG 4
n01795545/n01795545_9297.JPEG 4
n01795545/n01795545_9318.JPEG 4
n01795545/n01795545_9338.JPEG 4
n01795545/n01795545_936.JPEG 4
n01795545/n01795545_9366.JPEG 4
n01795545/n01795545_9380.JPEG 4
n01795545/n01795545_9385.JPEG 4
n01795545/n01795545_9393.JPEG 4
n01795545/n01795545_9426.JPEG 4
n01795545/n01795545_9443.JPEG 4
n01795545/n01795545_9467.JPEG 4
n01795545/n01795545_9480.JPEG 4
n01795545/n01795545_952.JPEG 4
n01795545/n01795545_9527.JPEG 4
n01795545/n01795545_954.JPEG 4
n01795545/n01795545_9555.JPEG 4
n01795545/n01795545_9559.JPEG 4
n01795545/n01795545_9561.JPEG 4
n01795545/n01795545_9581.JPEG 4
n01795545/n01795545_959.JPEG 4
n01795545/n01795545_96.JPEG 4
n01795545/n01795545_9605.JPEG 4
n01795545/n01795545_962.JPEG 4
n01795545/n01795545_9670.JPEG 4
n01795545/n01795545_9674.JPEG 4
n01795545/n01795545_9688.JPEG 4
n01795545/n01795545_9695.JPEG 4
n01795545/n01795545_9701.JPEG 4
n01795545/n01795545_9703.JPEG 4
n01795545/n01795545_9730.JPEG 4
n01795545/n01795545_9738.JPEG 4
n01795545/n01795545_9739.JPEG 4
n01795545/n01795545_9752.JPEG 4
n01795545/n01795545_9771.JPEG 4
n01795545/n01795545_9772.JPEG 4
n01795545/n01795545_9779.JPEG 4
n01795545/n01795545_979.JPEG 4
n01795545/n01795545_9790.JPEG 4
n01795545/n01795545_9798.JPEG 4
n01795545/n01795545_9816.JPEG 4
n01795545/n01795545_9817.JPEG 4
n01795545/n01795545_9836.JPEG 4
n01795545/n01795545_9837.JPEG 4
n01795545/n01795545_9845.JPEG 4
n01795545/n01795545_9849.JPEG 4
n01795545/n01795545_985.JPEG 4
n01795545/n01795545_9856.JPEG 4
n01795545/n01795545_9880.JPEG 4
n01795545/n01795545_9895.JPEG 4
n01795545/n01795545_9911.JPEG 4
n01795545/n01795545_9917.JPEG 4
n01795545/n01795545_9933.JPEG 4
n01795545/n01795545_9936.JPEG 4
n01795545/n01795545_995.JPEG 4
n01795545/n01795545_9988.JPEG 4
n01796340/n01796340_100.JPEG 4
n01796340/n01796340_10009.JPEG 4
n01796340/n01796340_1001.JPEG 4
n01796340/n01796340_10015.JPEG 4
n01796340/n01796340_10024.JPEG 4
n01796340/n01796340_10041.JPEG 4
n01796340/n01796340_10045.JPEG 4
n01796340/n01796340_1007.JPEG 4
n01796340/n01796340_10070.JPEG 4
n01796340/n01796340_10075.JPEG 4
n01796340/n01796340_10081.JPEG 4
n01796340/n01796340_10099.JPEG 4
n01796340/n01796340_10106.JPEG 4
n01796340/n01796340_10115.JPEG 4
n01796340/n01796340_10117.JPEG 4
n01796340/n01796340_1012.JPEG 4
n01796340/n01796340_10135.JPEG 4
n01796340/n01796340_10140.JPEG 4
n01796340/n01796340_1016.JPEG 4
n01796340/n01796340_10162.JPEG 4
n01796340/n01796340_10172.JPEG 4
n01796340/n01796340_10174.JPEG 4
n01796340/n01796340_1018.JPEG 4
n01796340/n01796340_10181.JPEG 4
n01796340/n01796340_10187.JPEG 4
n01796340/n01796340_10207.JPEG 4
n01796340/n01796340_10214.JPEG 4
n01796340/n01796340_10217.JPEG 4
n01796340/n01796340_10222.JPEG 4
n01796340/n01796340_10224.JPEG 4
n01796340/n01796340_10229.JPEG 4
n01796340/n01796340_10236.JPEG 4
n01796340/n01796340_10244.JPEG 4
n01796340/n01796340_10247.JPEG 4
n01796340/n01796340_10275.JPEG 4
n01796340/n01796340_1029.JPEG 4
n01796340/n01796340_10298.JPEG 4
n01796340/n01796340_10311.JPEG 4
n01796340/n01796340_10333.JPEG 4
n01796340/n01796340_10335.JPEG 4
n01796340/n01796340_1034.JPEG 4
n01796340/n01796340_10341.JPEG 4
n01796340/n01796340_10385.JPEG 4
n01796340/n01796340_10390.JPEG 4
n01796340/n01796340_10401.JPEG 4
n01796340/n01796340_1041.JPEG 4
n01796340/n01796340_10414.JPEG 4
n01796340/n01796340_10426.JPEG 4
n01796340/n01796340_10443.JPEG 4
n01796340/n01796340_10489.JPEG 4
n01796340/n01796340_10501.JPEG 4
n01796340/n01796340_10510.JPEG 4
n01796340/n01796340_10530.JPEG 4
n01796340/n01796340_10545.JPEG 4
n01796340/n01796340_10555.JPEG 4
n01796340/n01796340_10559.JPEG 4
n01796340/n01796340_10563.JPEG 4
n01796340/n01796340_10604.JPEG 4
n01796340/n01796340_10616.JPEG 4
n01796340/n01796340_10632.JPEG 4
n01796340/n01796340_10638.JPEG 4
n01796340/n01796340_1064.JPEG 4
n01796340/n01796340_10659.JPEG 4
n01796340/n01796340_10677.JPEG 4
n01796340/n01796340_1068.JPEG 4
n01796340/n01796340_10744.JPEG 4
n01796340/n01796340_10784.JPEG 4
n01796340/n01796340_10805.JPEG 4
n01796340/n01796340_10821.JPEG 4
n01796340/n01796340_10853.JPEG 4
n01796340/n01796340_10877.JPEG 4
n01796340/n01796340_10902.JPEG 4
n01796340/n01796340_1093.JPEG 4
n01796340/n01796340_11022.JPEG 4
n01796340/n01796340_11067.JPEG 4
n01796340/n01796340_11083.JPEG 4
n01796340/n01796340_1111.JPEG 4
n01796340/n01796340_11149.JPEG 4
n01796340/n01796340_112.JPEG 4
n01796340/n01796340_11217.JPEG 4
n01796340/n01796340_11237.JPEG 4
n01796340/n01796340_1124.JPEG 4
n01796340/n01796340_11254.JPEG 4
n01796340/n01796340_11268.JPEG 4
n01796340/n01796340_11299.JPEG 4
n01796340/n01796340_11315.JPEG 4
n01796340/n01796340_11352.JPEG 4
n01796340/n01796340_11384.JPEG 4
n01796340/n01796340_11402.JPEG 4
n01796340/n01796340_11412.JPEG 4
n01796340/n01796340_11424.JPEG 4
n01796340/n01796340_11426.JPEG 4
n01796340/n01796340_11430.JPEG 4
n01796340/n01796340_11456.JPEG 4
n01796340/n01796340_1149.JPEG 4
n01796340/n01796340_11526.JPEG 4
n01796340/n01796340_1154.JPEG 4
n01796340/n01796340_1156.JPEG 4
n01796340/n01796340_11560.JPEG 4
n01796340/n01796340_11567.JPEG 4
n01796340/n01796340_1162.JPEG 4
n01796340/n01796340_11624.JPEG 4
n01796340/n01796340_11633.JPEG 4
n01796340/n01796340_11644.JPEG 4
n01796340/n01796340_11654.JPEG 4
n01796340/n01796340_11659.JPEG 4
n01796340/n01796340_11672.JPEG 4
n01796340/n01796340_1170.JPEG 4
n01796340/n01796340_11703.JPEG 4
n01796340/n01796340_11710.JPEG 4
n01796340/n01796340_11726.JPEG 4
n01796340/n01796340_11749.JPEG 4
n01796340/n01796340_11781.JPEG 4
n01796340/n01796340_11783.JPEG 4
n01796340/n01796340_11789.JPEG 4
n01796340/n01796340_1181.JPEG 4
n01796340/n01796340_1183.JPEG 4
n01796340/n01796340_11831.JPEG 4
n01796340/n01796340_11835.JPEG 4
n01796340/n01796340_1184.JPEG 4
n01796340/n01796340_11851.JPEG 4
n01796340/n01796340_11901.JPEG 4
n01796340/n01796340_11965.JPEG 4
n01796340/n01796340_12035.JPEG 4
n01796340/n01796340_12049.JPEG 4
n01796340/n01796340_12069.JPEG 4
n01796340/n01796340_1208.JPEG 4
n01796340/n01796340_12086.JPEG 4
n01796340/n01796340_1210.JPEG 4
n01796340/n01796340_12124.JPEG 4
n01796340/n01796340_1215.JPEG 4
n01796340/n01796340_12206.JPEG 4
n01796340/n01796340_12207.JPEG 4
n01796340/n01796340_12212.JPEG 4
n01796340/n01796340_12216.JPEG 4
n01796340/n01796340_12263.JPEG 4
n01796340/n01796340_12287.JPEG 4
n01796340/n01796340_1230.JPEG 4
n01796340/n01796340_12317.JPEG 4
n01796340/n01796340_12349.JPEG 4
n01796340/n01796340_12438.JPEG 4
n01796340/n01796340_12447.JPEG 4
n01796340/n01796340_12452.JPEG 4
n01796340/n01796340_12532.JPEG 4
n01796340/n01796340_12562.JPEG 4
n01796340/n01796340_12627.JPEG 4
n01796340/n01796340_1263.JPEG 4
n01796340/n01796340_12645.JPEG 4
n01796340/n01796340_12652.JPEG 4
n01796340/n01796340_1266.JPEG 4
n01796340/n01796340_12675.JPEG 4
n01796340/n01796340_12704.JPEG 4
n01796340/n01796340_12741.JPEG 4
n01796340/n01796340_12745.JPEG 4
n01796340/n01796340_12755.JPEG 4
n01796340/n01796340_128.JPEG 4
n01796340/n01796340_12802.JPEG 4
n01796340/n01796340_12806.JPEG 4
n01796340/n01796340_12834.JPEG 4
n01796340/n01796340_12862.JPEG 4
n01796340/n01796340_12883.JPEG 4
n01796340/n01796340_12890.JPEG 4
n01796340/n01796340_12914.JPEG 4
n01796340/n01796340_12918.JPEG 4
n01796340/n01796340_12948.JPEG 4
n01796340/n01796340_12950.JPEG 4
n01796340/n01796340_12959.JPEG 4
n01796340/n01796340_1299.JPEG 4
n01796340/n01796340_13011.JPEG 4
n01796340/n01796340_13032.JPEG 4
n01796340/n01796340_13033.JPEG 4
n01796340/n01796340_13059.JPEG 4
n01796340/n01796340_13061.JPEG 4
n01796340/n01796340_13063.JPEG 4
n01796340/n01796340_13099.JPEG 4
n01796340/n01796340_1310.JPEG 4
n01796340/n01796340_13144.JPEG 4
n01796340/n01796340_1317.JPEG 4
n01796340/n01796340_13176.JPEG 4
n01796340/n01796340_13269.JPEG 4
n01796340/n01796340_13287.JPEG 4
n01796340/n01796340_1329.JPEG 4
n01796340/n01796340_13315.JPEG 4
n01796340/n01796340_13318.JPEG 4
n01796340/n01796340_13334.JPEG 4
n01796340/n01796340_1335.JPEG 4
n01796340/n01796340_13357.JPEG 4
n01796340/n01796340_13434.JPEG 4
n01796340/n01796340_13435.JPEG 4
n01796340/n01796340_13477.JPEG 4
n01796340/n01796340_1349.JPEG 4
n01796340/n01796340_13500.JPEG 4
n01796340/n01796340_13508.JPEG 4
n01796340/n01796340_13552.JPEG 4
n01796340/n01796340_13600.JPEG 4
n01796340/n01796340_13620.JPEG 4
n01796340/n01796340_13648.JPEG 4
n01796340/n01796340_13669.JPEG 4
n01796340/n01796340_13685.JPEG 4
n01796340/n01796340_13712.JPEG 4
n01796340/n01796340_13727.JPEG 4
n01796340/n01796340_13729.JPEG 4
n01796340/n01796340_1377.JPEG 4
n01796340/n01796340_13776.JPEG 4
n01796340/n01796340_13809.JPEG 4
n01796340/n01796340_1382.JPEG 4
n01796340/n01796340_1386.JPEG 4
n01796340/n01796340_13863.JPEG 4
n01796340/n01796340_13874.JPEG 4
n01796340/n01796340_1388.JPEG 4
n01796340/n01796340_13910.JPEG 4
n01796340/n01796340_13912.JPEG 4
n01796340/n01796340_13989.JPEG 4
n01796340/n01796340_14032.JPEG 4
n01796340/n01796340_14078.JPEG 4
n01796340/n01796340_1409.JPEG 4
n01796340/n01796340_1415.JPEG 4
n01796340/n01796340_14175.JPEG 4
n01796340/n01796340_14204.JPEG 4
n01796340/n01796340_1422.JPEG 4
n01796340/n01796340_14222.JPEG 4
n01796340/n01796340_1424.JPEG 4
n01796340/n01796340_1425.JPEG 4
n01796340/n01796340_14320.JPEG 4
n01796340/n01796340_14347.JPEG 4
n01796340/n01796340_14357.JPEG 4
n01796340/n01796340_14360.JPEG 4
n01796340/n01796340_144.JPEG 4
n01796340/n01796340_1440.JPEG 4
n01796340/n01796340_14416.JPEG 4
n01796340/n01796340_14420.JPEG 4
n01796340/n01796340_14427.JPEG 4
n01796340/n01796340_14483.JPEG 4
n01796340/n01796340_14497.JPEG 4
n01796340/n01796340_14527.JPEG 4
n01796340/n01796340_1455.JPEG 4
n01796340/n01796340_14550.JPEG 4
n01796340/n01796340_1456.JPEG 4
n01796340/n01796340_14563.JPEG 4
n01796340/n01796340_14572.JPEG 4
n01796340/n01796340_1458.JPEG 4
n01796340/n01796340_14616.JPEG 4
n01796340/n01796340_14635.JPEG 4
n01796340/n01796340_14651.JPEG 4
n01796340/n01796340_14659.JPEG 4
n01796340/n01796340_14668.JPEG 4
n01796340/n01796340_14676.JPEG 4
n01796340/n01796340_14695.JPEG 4
n01796340/n01796340_14749.JPEG 4
n01796340/n01796340_14762.JPEG 4
n01796340/n01796340_14765.JPEG 4
n01796340/n01796340_14766.JPEG 4
n01796340/n01796340_14777.JPEG 4
n01796340/n01796340_14833.JPEG 4
n01796340/n01796340_14834.JPEG 4
n01796340/n01796340_14836.JPEG 4
n01796340/n01796340_14862.JPEG 4
n01796340/n01796340_14867.JPEG 4
n01796340/n01796340_14884.JPEG 4
n01796340/n01796340_14957.JPEG 4
n01796340/n01796340_1497.JPEG 4
n01796340/n01796340_15.JPEG 4
n01796340/n01796340_15004.JPEG 4
n01796340/n01796340_15013.JPEG 4
n01796340/n01796340_15044.JPEG 4
n01796340/n01796340_15050.JPEG 4
n01796340/n01796340_15071.JPEG 4
n01796340/n01796340_15079.JPEG 4
n01796340/n01796340_15116.JPEG 4
n01796340/n01796340_15142.JPEG 4
n01796340/n01796340_15155.JPEG 4
n01796340/n01796340_1520.JPEG 4
n01796340/n01796340_1521.JPEG 4
n01796340/n01796340_15220.JPEG 4
n01796340/n01796340_15229.JPEG 4
n01796340/n01796340_15236.JPEG 4
n01796340/n01796340_15258.JPEG 4
n01796340/n01796340_15259.JPEG 4
n01796340/n01796340_15265.JPEG 4
n01796340/n01796340_1530.JPEG 4
n01796340/n01796340_15331.JPEG 4
n01796340/n01796340_15337.JPEG 4
n01796340/n01796340_15338.JPEG 4
n01796340/n01796340_15340.JPEG 4
n01796340/n01796340_15342.JPEG 4
n01796340/n01796340_1536.JPEG 4
n01796340/n01796340_15363.JPEG 4
n01796340/n01796340_15374.JPEG 4
n01796340/n01796340_15392.JPEG 4
n01796340/n01796340_15401.JPEG 4
n01796340/n01796340_15442.JPEG 4
n01796340/n01796340_1549.JPEG 4
n01796340/n01796340_15492.JPEG 4
n01796340/n01796340_15495.JPEG 4
n01796340/n01796340_15521.JPEG 4
n01796340/n01796340_15536.JPEG 4
n01796340/n01796340_15550.JPEG 4
n01796340/n01796340_15551.JPEG 4
n01796340/n01796340_15589.JPEG 4
n01796340/n01796340_15609.JPEG 4
n01796340/n01796340_15619.JPEG 4
n01796340/n01796340_1568.JPEG 4
n01796340/n01796340_15685.JPEG 4
n01796340/n01796340_15697.JPEG 4
n01796340/n01796340_15726.JPEG 4
n01796340/n01796340_15729.JPEG 4
n01796340/n01796340_15737.JPEG 4
n01796340/n01796340_15760.JPEG 4
n01796340/n01796340_158.JPEG 4
n01796340/n01796340_1580.JPEG 4
n01796340/n01796340_1581.JPEG 4
n01796340/n01796340_15813.JPEG 4
n01796340/n01796340_15864.JPEG 4
n01796340/n01796340_15876.JPEG 4
n01796340/n01796340_15881.JPEG 4
n01796340/n01796340_15898.JPEG 4
n01796340/n01796340_15899.JPEG 4
n01796340/n01796340_15905.JPEG 4
n01796340/n01796340_15929.JPEG 4
n01796340/n01796340_15956.JPEG 4
n01796340/n01796340_15977.JPEG 4
n01796340/n01796340_15996.JPEG 4
n01796340/n01796340_16035.JPEG 4
n01796340/n01796340_1604.JPEG 4
n01796340/n01796340_16051.JPEG 4
n01796340/n01796340_16108.JPEG 4
n01796340/n01796340_16146.JPEG 4
n01796340/n01796340_16163.JPEG 4
n01796340/n01796340_1617.JPEG 4
n01796340/n01796340_16174.JPEG 4
n01796340/n01796340_16282.JPEG 4
n01796340/n01796340_16283.JPEG 4
n01796340/n01796340_16328.JPEG 4
n01796340/n01796340_16346.JPEG 4
n01796340/n01796340_1636.JPEG 4
n01796340/n01796340_1638.JPEG 4
n01796340/n01796340_16389.JPEG 4
n01796340/n01796340_1642.JPEG 4
n01796340/n01796340_16448.JPEG 4
n01796340/n01796340_16468.JPEG 4
n01796340/n01796340_16488.JPEG 4
n01796340/n01796340_1650.JPEG 4
n01796340/n01796340_16513.JPEG 4
n01796340/n01796340_16539.JPEG 4
n01796340/n01796340_16543.JPEG 4
n01796340/n01796340_16548.JPEG 4
n01796340/n01796340_16570.JPEG 4
n01796340/n01796340_1663.JPEG 4
n01796340/n01796340_16633.JPEG 4
n01796340/n01796340_1664.JPEG 4
n01796340/n01796340_16650.JPEG 4
n01796340/n01796340_16653.JPEG 4
n01796340/n01796340_16660.JPEG 4
n01796340/n01796340_16686.JPEG 4
n01796340/n01796340_16687.JPEG 4
n01796340/n01796340_16748.JPEG 4
n01796340/n01796340_1676.JPEG 4
n01796340/n01796340_16785.JPEG 4
n01796340/n01796340_16804.JPEG 4
n01796340/n01796340_16805.JPEG 4
n01796340/n01796340_16827.JPEG 4
n01796340/n01796340_16832.JPEG 4
n01796340/n01796340_16835.JPEG 4
n01796340/n01796340_16836.JPEG 4
n01796340/n01796340_1685.JPEG 4
n01796340/n01796340_16889.JPEG 4
n01796340/n01796340_16923.JPEG 4
n01796340/n01796340_16926.JPEG 4
n01796340/n01796340_16946.JPEG 4
n01796340/n01796340_16999.JPEG 4
n01796340/n01796340_17018.JPEG 4
n01796340/n01796340_1702.JPEG 4
n01796340/n01796340_1704.JPEG 4
n01796340/n01796340_1706.JPEG 4
n01796340/n01796340_17091.JPEG 4
n01796340/n01796340_17130.JPEG 4
n01796340/n01796340_17147.JPEG 4
n01796340/n01796340_17163.JPEG 4
n01796340/n01796340_17191.JPEG 4
n01796340/n01796340_17237.JPEG 4
n01796340/n01796340_17248.JPEG 4
n01796340/n01796340_17315.JPEG 4
n01796340/n01796340_17323.JPEG 4
n01796340/n01796340_17353.JPEG 4
n01796340/n01796340_17355.JPEG 4
n01796340/n01796340_17381.JPEG 4
n01796340/n01796340_1744.JPEG 4
n01796340/n01796340_17449.JPEG 4
n01796340/n01796340_17466.JPEG 4
n01796340/n01796340_1748.JPEG 4
n01796340/n01796340_17554.JPEG 4
n01796340/n01796340_17555.JPEG 4
n01796340/n01796340_17590.JPEG 4
n01796340/n01796340_17607.JPEG 4
n01796340/n01796340_1762.JPEG 4
n01796340/n01796340_17626.JPEG 4
n01796340/n01796340_17640.JPEG 4
n01796340/n01796340_17641.JPEG 4
n01796340/n01796340_1767.JPEG 4
n01796340/n01796340_17685.JPEG 4
n01796340/n01796340_17757.JPEG 4
n01796340/n01796340_1776.JPEG 4
n01796340/n01796340_17789.JPEG 4
n01796340/n01796340_17871.JPEG 4
n01796340/n01796340_17872.JPEG 4
n01796340/n01796340_17899.JPEG 4
n01796340/n01796340_1790.JPEG 4
n01796340/n01796340_1793.JPEG 4
n01796340/n01796340_17976.JPEG 4
n01796340/n01796340_1798.JPEG 4
n01796340/n01796340_1802.JPEG 4
n01796340/n01796340_18022.JPEG 4
n01796340/n01796340_18033.JPEG 4
n01796340/n01796340_18045.JPEG 4
n01796340/n01796340_18141.JPEG 4
n01796340/n01796340_18165.JPEG 4
n01796340/n01796340_18193.JPEG 4
n01796340/n01796340_1821.JPEG 4
n01796340/n01796340_18254.JPEG 4
n01796340/n01796340_18266.JPEG 4
n01796340/n01796340_18284.JPEG 4
n01796340/n01796340_18333.JPEG 4
n01796340/n01796340_18379.JPEG 4
n01796340/n01796340_18396.JPEG 4
n01796340/n01796340_18400.JPEG 4
n01796340/n01796340_18461.JPEG 4
n01796340/n01796340_18474.JPEG 4
n01796340/n01796340_1848.JPEG 4
n01796340/n01796340_1850.JPEG 4
n01796340/n01796340_18563.JPEG 4
n01796340/n01796340_18591.JPEG 4
n01796340/n01796340_1860.JPEG 4
n01796340/n01796340_1861.JPEG 4
n01796340/n01796340_1864.JPEG 4
n01796340/n01796340_18692.JPEG 4
n01796340/n01796340_18704.JPEG 4
n01796340/n01796340_1872.JPEG 4
n01796340/n01796340_18729.JPEG 4
n01796340/n01796340_1877.JPEG 4
n01796340/n01796340_18776.JPEG 4
n01796340/n01796340_18788.JPEG 4
n01796340/n01796340_1879.JPEG 4
n01796340/n01796340_18792.JPEG 4
n01796340/n01796340_18808.JPEG 4
n01796340/n01796340_18836.JPEG 4
n01796340/n01796340_18853.JPEG 4
n01796340/n01796340_1888.JPEG 4
n01796340/n01796340_18880.JPEG 4
n01796340/n01796340_18891.JPEG 4
n01796340/n01796340_18895.JPEG 4
n01796340/n01796340_18959.JPEG 4
n01796340/n01796340_18961.JPEG 4
n01796340/n01796340_1897.JPEG 4
n01796340/n01796340_18986.JPEG 4
n01796340/n01796340_1901.JPEG 4
n01796340/n01796340_19044.JPEG 4
n01796340/n01796340_1906.JPEG 4
n01796340/n01796340_19073.JPEG 4
n01796340/n01796340_19102.JPEG 4
n01796340/n01796340_1911.JPEG 4
n01796340/n01796340_19178.JPEG 4
n01796340/n01796340_1918.JPEG 4
n01796340/n01796340_19190.JPEG 4
n01796340/n01796340_19254.JPEG 4
n01796340/n01796340_19262.JPEG 4
n01796340/n01796340_19296.JPEG 4
n01796340/n01796340_19329.JPEG 4
n01796340/n01796340_19376.JPEG 4
n01796340/n01796340_19404.JPEG 4
n01796340/n01796340_1949.JPEG 4
n01796340/n01796340_19517.JPEG 4
n01796340/n01796340_1953.JPEG 4
n01796340/n01796340_1960.JPEG 4
n01796340/n01796340_19614.JPEG 4
n01796340/n01796340_19667.JPEG 4
n01796340/n01796340_19707.JPEG 4
n01796340/n01796340_19730.JPEG 4
n01796340/n01796340_19746.JPEG 4
n01796340/n01796340_19749.JPEG 4
n01796340/n01796340_19753.JPEG 4
n01796340/n01796340_1976.JPEG 4
n01796340/n01796340_19780.JPEG 4
n01796340/n01796340_19853.JPEG 4
n01796340/n01796340_19859.JPEG 4
n01796340/n01796340_1986.JPEG 4
n01796340/n01796340_19874.JPEG 4
n01796340/n01796340_19886.JPEG 4
n01796340/n01796340_19895.JPEG 4
n01796340/n01796340_19899.JPEG 4
n01796340/n01796340_199.JPEG 4
n01796340/n01796340_19900.JPEG 4
n01796340/n01796340_19911.JPEG 4
n01796340/n01796340_19914.JPEG 4
n01796340/n01796340_19929.JPEG 4
n01796340/n01796340_19931.JPEG 4
n01796340/n01796340_19933.JPEG 4
n01796340/n01796340_1994.JPEG 4
n01796340/n01796340_1996.JPEG 4
n01796340/n01796340_19983.JPEG 4
n01796340/n01796340_1999.JPEG 4
n01796340/n01796340_2000.JPEG 4
n01796340/n01796340_20019.JPEG 4
n01796340/n01796340_20055.JPEG 4
n01796340/n01796340_20128.JPEG 4
n01796340/n01796340_2013.JPEG 4
n01796340/n01796340_20137.JPEG 4
n01796340/n01796340_2016.JPEG 4
n01796340/n01796340_2017.JPEG 4
n01796340/n01796340_2024.JPEG 4
n01796340/n01796340_20277.JPEG 4
n01796340/n01796340_20278.JPEG 4
n01796340/n01796340_20281.JPEG 4
n01796340/n01796340_2030.JPEG 4
n01796340/n01796340_20317.JPEG 4
n01796340/n01796340_20351.JPEG 4
n01796340/n01796340_20367.JPEG 4
n01796340/n01796340_20373.JPEG 4
n01796340/n01796340_20393.JPEG 4
n01796340/n01796340_20469.JPEG 4
n01796340/n01796340_2048.JPEG 4
n01796340/n01796340_20484.JPEG 4
n01796340/n01796340_2049.JPEG 4
n01796340/n01796340_20551.JPEG 4
n01796340/n01796340_20564.JPEG 4
n01796340/n01796340_2057.JPEG 4
n01796340/n01796340_20588.JPEG 4
n01796340/n01796340_20598.JPEG 4
n01796340/n01796340_20623.JPEG 4
n01796340/n01796340_20647.JPEG 4
n01796340/n01796340_2073.JPEG 4
n01796340/n01796340_20771.JPEG 4
n01796340/n01796340_2078.JPEG 4
n01796340/n01796340_20794.JPEG 4
n01796340/n01796340_2083.JPEG 4
n01796340/n01796340_2087.JPEG 4
n01796340/n01796340_20880.JPEG 4
n01796340/n01796340_2093.JPEG 4
n01796340/n01796340_2097.JPEG 4
n01796340/n01796340_211.JPEG 4
n01796340/n01796340_2112.JPEG 4
n01796340/n01796340_21175.JPEG 4
n01796340/n01796340_21216.JPEG 4
n01796340/n01796340_21225.JPEG 4
n01796340/n01796340_2135.JPEG 4
n01796340/n01796340_21408.JPEG 4
n01796340/n01796340_2157.JPEG 4
n01796340/n01796340_21584.JPEG 4
n01796340/n01796340_21619.JPEG 4
n01796340/n01796340_21672.JPEG 4
n01796340/n01796340_218.JPEG 4
n01796340/n01796340_2187.JPEG 4
n01796340/n01796340_21975.JPEG 4
n01796340/n01796340_21982.JPEG 4
n01796340/n01796340_2199.JPEG 4
n01796340/n01796340_2207.JPEG 4
n01796340/n01796340_2213.JPEG 4
n01796340/n01796340_2217.JPEG 4
n01796340/n01796340_22284.JPEG 4
n01796340/n01796340_22298.JPEG 4
n01796340/n01796340_2236.JPEG 4
n01796340/n01796340_22377.JPEG 4
n01796340/n01796340_2258.JPEG 4
n01796340/n01796340_2260.JPEG 4
n01796340/n01796340_22742.JPEG 4
n01796340/n01796340_2289.JPEG 4
n01796340/n01796340_229.JPEG 4
n01796340/n01796340_2292.JPEG 4
n01796340/n01796340_2293.JPEG 4
n01796340/n01796340_2298.JPEG 4
n01796340/n01796340_2306.JPEG 4
n01796340/n01796340_23170.JPEG 4
n01796340/n01796340_233.JPEG 4
n01796340/n01796340_23434.JPEG 4
n01796340/n01796340_2345.JPEG 4
n01796340/n01796340_23465.JPEG 4
n01796340/n01796340_23517.JPEG 4
n01796340/n01796340_2355.JPEG 4
n01796340/n01796340_23570.JPEG 4
n01796340/n01796340_2359.JPEG 4
n01796340/n01796340_23692.JPEG 4
n01796340/n01796340_2372.JPEG 4
n01796340/n01796340_2382.JPEG 4
n01796340/n01796340_2386.JPEG 4
n01796340/n01796340_2395.JPEG 4
n01796340/n01796340_2397.JPEG 4
n01796340/n01796340_23972.JPEG 4
n01796340/n01796340_2420.JPEG 4
n01796340/n01796340_24254.JPEG 4
n01796340/n01796340_243.JPEG 4
n01796340/n01796340_2430.JPEG 4
n01796340/n01796340_24317.JPEG 4
n01796340/n01796340_2441.JPEG 4
n01796340/n01796340_2447.JPEG 4
n01796340/n01796340_24518.JPEG 4
n01796340/n01796340_2456.JPEG 4
n01796340/n01796340_24627.JPEG 4
n01796340/n01796340_2468.JPEG 4
n01796340/n01796340_24693.JPEG 4
n01796340/n01796340_24727.JPEG 4
n01796340/n01796340_24878.JPEG 4
n01796340/n01796340_2495.JPEG 4
n01796340/n01796340_2501.JPEG 4
n01796340/n01796340_2502.JPEG 4
n01796340/n01796340_2503.JPEG 4
n01796340/n01796340_25142.JPEG 4
n01796340/n01796340_25168.JPEG 4
n01796340/n01796340_25176.JPEG 4
n01796340/n01796340_2522.JPEG 4
n01796340/n01796340_2529.JPEG 4
n01796340/n01796340_253.JPEG 4
n01796340/n01796340_25361.JPEG 4
n01796340/n01796340_2538.JPEG 4
n01796340/n01796340_2539.JPEG 4
n01796340/n01796340_254.JPEG 4
n01796340/n01796340_25440.JPEG 4
n01796340/n01796340_25450.JPEG 4
n01796340/n01796340_25527.JPEG 4
n01796340/n01796340_25536.JPEG 4
n01796340/n01796340_2557.JPEG 4
n01796340/n01796340_25582.JPEG 4
n01796340/n01796340_257.JPEG 4
n01796340/n01796340_2573.JPEG 4
n01796340/n01796340_2576.JPEG 4
n01796340/n01796340_25799.JPEG 4
n01796340/n01796340_2581.JPEG 4
n01796340/n01796340_2587.JPEG 4
n01796340/n01796340_25883.JPEG 4
n01796340/n01796340_2593.JPEG 4
n01796340/n01796340_2597.JPEG 4
n01796340/n01796340_26049.JPEG 4
n01796340/n01796340_26185.JPEG 4
n01796340/n01796340_26194.JPEG 4
n01796340/n01796340_26241.JPEG 4
n01796340/n01796340_2626.JPEG 4
n01796340/n01796340_2630.JPEG 4
n01796340/n01796340_26307.JPEG 4
n01796340/n01796340_2636.JPEG 4
n01796340/n01796340_26420.JPEG 4
n01796340/n01796340_2643.JPEG 4
n01796340/n01796340_2654.JPEG 4
n01796340/n01796340_2657.JPEG 4
n01796340/n01796340_266.JPEG 4
n01796340/n01796340_26682.JPEG 4
n01796340/n01796340_26755.JPEG 4
n01796340/n01796340_2698.JPEG 4
n01796340/n01796340_2707.JPEG 4
n01796340/n01796340_2710.JPEG 4
n01796340/n01796340_2714.JPEG 4
n01796340/n01796340_27198.JPEG 4
n01796340/n01796340_27213.JPEG 4
n01796340/n01796340_27329.JPEG 4
n01796340/n01796340_27332.JPEG 4
n01796340/n01796340_27335.JPEG 4
n01796340/n01796340_2749.JPEG 4
n01796340/n01796340_27539.JPEG 4
n01796340/n01796340_2755.JPEG 4
n01796340/n01796340_2761.JPEG 4
n01796340/n01796340_2763.JPEG 4
n01796340/n01796340_2767.JPEG 4
n01796340/n01796340_2769.JPEG 4
n01796340/n01796340_27744.JPEG 4
n01796340/n01796340_2783.JPEG 4
n01796340/n01796340_2786.JPEG 4
n01796340/n01796340_2790.JPEG 4
n01796340/n01796340_28006.JPEG 4
n01796340/n01796340_28014.JPEG 4
n01796340/n01796340_28015.JPEG 4
n01796340/n01796340_2803.JPEG 4
n01796340/n01796340_28271.JPEG 4
n01796340/n01796340_2833.JPEG 4
[truncated: 3,579,293 more chars]
