# Supplementary material
Source: ML conference proceedings conference paper supplement (https://proceedings.neurips.cc/paper_files/paper/2020/hash/618491e20a9b686b79e158c293ab4f91-Abstract.html)
Supplement: Supplementary file 1 [file 618491e20a9b686b79e158c293ab4f91-Supplemental.zip › codes/restricted_imagenet/preprocessing/val.txt]

ILSVRC2012_val_00000013.JPEG 5
ILSVRC2012_val_00000037.JPEG 2
ILSVRC2012_val_00000050.JPEG 6
ILSVRC2012_val_00000051.JPEG 4
ILSVRC2012_val_00000057.JPEG 0
ILSVRC2012_val_00000066.JPEG 6
ILSVRC2012_val_00000075.JPEG 4
ILSVRC2012_val_00000087.JPEG 5
ILSVRC2012_val_00000093.JPEG 5
ILSVRC2012_val_00000095.JPEG 5
ILSVRC2012_val_00000124.JPEG 6
ILSVRC2012_val_00000125.JPEG 8
ILSVRC2012_val_00000130.JPEG 1
ILSVRC2012_val_00000161.JPEG 0
ILSVRC2012_val_00000178.JPEG 0
ILSVRC2012_val_00000195.JPEG 7
ILSVRC2012_val_00000196.JPEG 6
ILSVRC2012_val_00000206.JPEG 5
ILSVRC2012_val_00000211.JPEG 1
ILSVRC2012_val_00000224.JPEG 0
ILSVRC2012_val_00000229.JPEG 3
ILSVRC2012_val_00000238.JPEG 7
ILSVRC2012_val_00000242.JPEG 5
ILSVRC2012_val_00000278.JPEG 4
ILSVRC2012_val_00000283.JPEG 1
ILSVRC2012_val_00000312.JPEG 6
ILSVRC2012_val_00000316.JPEG 6
ILSVRC2012_val_00000340.JPEG 5
ILSVRC2012_val_00000342.JPEG 8
ILSVRC2012_val_00000361.JPEG 8
ILSVRC2012_val_00000362.JPEG 3
ILSVRC2012_val_00000370.JPEG 4
ILSVRC2012_val_00000404.JPEG 3
ILSVRC2012_val_00000407.JPEG 8
ILSVRC2012_val_00000415.JPEG 4
ILSVRC2012_val_00000418.JPEG 8
ILSVRC2012_val_00000420.JPEG 4
ILSVRC2012_val_00000466.JPEG 4
ILSVRC2012_val_00000486.JPEG 5
ILSVRC2012_val_00000495.JPEG 5
ILSVRC2012_val_00000510.JPEG 8
ILSVRC2012_val_00000520.JPEG 5
ILSVRC2012_val_00000528.JPEG 4
ILSVRC2012_val_00000547.JPEG 4
ILSVRC2012_val_00000553.JPEG 5
ILSVRC2012_val_00000576.JPEG 4
ILSVRC2012_val_00000588.JPEG 0
ILSVRC2012_val_00000613.JPEG 0
ILSVRC2012_val_00000625.JPEG 8
ILSVRC2012_val_00000643.JPEG 0
ILSVRC2012_val_00000692.JPEG 8
ILSVRC2012_val_00000695.JPEG 5
ILSVRC2012_val_00000699.JPEG 6
ILSVRC2012_val_00000709.JPEG 1
ILSVRC2012_val_00000716.JPEG 0
ILSVRC2012_val_00000719.JPEG 0
ILSVRC2012_val_00000733.JPEG 1
ILSVRC2012_val_00000744.JPEG 4
ILSVRC2012_val_00000748.JPEG 0
ILSVRC2012_val_00000768.JPEG 8
ILSVRC2012_val_00000772.JPEG 8
ILSVRC2012_val_00000775.JPEG 6
ILSVRC2012_val_00000788.JPEG 5
ILSVRC2012_val_00000791.JPEG 3
ILSVRC2012_val_00000796.JPEG 1
ILSVRC2012_val_00000802.JPEG 0
ILSVRC2012_val_00000818.JPEG 7
ILSVRC2012_val_00000819.JPEG 8
ILSVRC2012_val_00000821.JPEG 7
ILSVRC2012_val_00000828.JPEG 5
ILSVRC2012_val_00000860.JPEG 4
ILSVRC2012_val_00000870.JPEG 5
ILSVRC2012_val_00000882.JPEG 0
ILSVRC2012_val_00000885.JPEG 4
ILSVRC2012_val_00000918.JPEG 6
ILSVRC2012_val_00000924.JPEG 8
ILSVRC2012_val_00000926.JPEG 8
ILSVRC2012_val_00000929.JPEG 4
ILSVRC2012_val_00000930.JPEG 3
ILSVRC2012_val_00000933.JPEG 6
ILSVRC2012_val_00000938.JPEG 3
ILSVRC2012_val_00000944.JPEG 2
ILSVRC2012_val_00000945.JPEG 5
ILSVRC2012_val_00000952.JPEG 4
ILSVRC2012_val_00000956.JPEG 8
ILSVRC2012_val_00000958.JPEG 3
ILSVRC2012_val_00000964.JPEG 5
ILSVRC2012_val_00000972.JPEG 8
ILSVRC2012_val_00000974.JPEG 5
ILSVRC2012_val_00000996.JPEG 6
ILSVRC2012_val_00000997.JPEG 0
ILSVRC2012_val_00001032.JPEG 5
ILSVRC2012_val_00001039.JPEG 0
ILSVRC2012_val_00001040.JPEG 1
ILSVRC2012_val_00001044.JPEG 4
ILSVRC2012_val_00001051.JPEG 6
ILSVRC2012_val_00001065.JPEG 0
ILSVRC2012_val_00001075.JPEG 5
ILSVRC2012_val_00001082.JPEG 8
ILSVRC2012_val_00001092.JPEG 5
ILSVRC2012_val_00001095.JPEG 5
ILSVRC2012_val_00001099.JPEG 5
ILSVRC2012_val_00001101.JPEG 1
ILSVRC2012_val_00001104.JPEG 5
ILSVRC2012_val_00001122.JPEG 7
ILSVRC2012_val_00001124.JPEG 7
ILSVRC2012_val_00001132.JPEG 1
ILSVRC2012_val_00001136.JPEG 4
ILSVRC2012_val_00001141.JPEG 0
ILSVRC2012_val_00001142.JPEG 4
ILSVRC2012_val_00001146.JPEG 4
ILSVRC2012_val_00001155.JPEG 5
ILSVRC2012_val_00001158.JPEG 4
ILSVRC2012_val_00001163.JPEG 4
ILSVRC2012_val_00001164.JPEG 0
ILSVRC2012_val_00001176.JPEG 6
ILSVRC2012_val_00001189.JPEG 6
ILSVRC2012_val_00001193.JPEG 6
ILSVRC2012_val_00001198.JPEG 0
ILSVRC2012_val_00001223.JPEG 0
ILSVRC2012_val_00001236.JPEG 5
ILSVRC2012_val_00001238.JPEG 8
ILSVRC2012_val_00001254.JPEG 5
ILSVRC2012_val_00001284.JPEG 0
ILSVRC2012_val_00001288.JPEG 4
ILSVRC2012_val_00001336.JPEG 4
ILSVRC2012_val_00001341.JPEG 1
ILSVRC2012_val_00001357.JPEG 4
ILSVRC2012_val_00001421.JPEG 8
ILSVRC2012_val_00001435.JPEG 4
ILSVRC2012_val_00001436.JPEG 6
ILSVRC2012_val_00001449.JPEG 7
ILSVRC2012_val_00001458.JPEG 5
ILSVRC2012_val_00001461.JPEG 4
ILSVRC2012_val_00001466.JPEG 8
ILSVRC2012_val_00001467.JPEG 0
ILSVRC2012_val_00001480.JPEG 4
ILSVRC2012_val_00001481.JPEG 0
ILSVRC2012_val_00001494.JPEG 0
ILSVRC2012_val_00001496.JPEG 1
ILSVRC2012_val_00001502.JPEG 8
ILSVRC2012_val_00001504.JPEG 5
ILSVRC2012_val_00001529.JPEG 8
ILSVRC2012_val_00001535.JPEG 5
ILSVRC2012_val_00001537.JPEG 4
ILSVRC2012_val_00001539.JPEG 8
ILSVRC2012_val_00001546.JPEG 5
ILSVRC2012_val_00001557.JPEG 3
ILSVRC2012_val_00001563.JPEG 4
ILSVRC2012_val_00001566.JPEG 8
ILSVRC2012_val_00001570.JPEG 8
ILSVRC2012_val_00001580.JPEG 5
ILSVRC2012_val_00001585.JPEG 8
ILSVRC2012_val_00001595.JPEG 6
ILSVRC2012_val_00001596.JPEG 4
ILSVRC2012_val_00001629.JPEG 4
ILSVRC2012_val_00001636.JPEG 3
ILSVRC2012_val_00001641.JPEG 4
ILSVRC2012_val_00001649.JPEG 3
ILSVRC2012_val_00001652.JPEG 2
ILSVRC2012_val_00001656.JPEG 5
ILSVRC2012_val_00001662.JPEG 3
ILSVRC2012_val_00001669.JPEG 6
ILSVRC2012_val_00001678.JPEG 4
ILSVRC2012_val_00001686.JPEG 0
ILSVRC2012_val_00001709.JPEG 0
ILSVRC2012_val_00001714.JPEG 8
ILSVRC2012_val_00001732.JPEG 4
ILSVRC2012_val_00001737.JPEG 8
ILSVRC2012_val_00001739.JPEG 2
ILSVRC2012_val_00001747.JPEG 6
ILSVRC2012_val_00001749.JPEG 4
ILSVRC2012_val_00001752.JPEG 8
ILSVRC2012_val_00001763.JPEG 8
ILSVRC2012_val_00001764.JPEG 0
ILSVRC2012_val_00001776.JPEG 8
ILSVRC2012_val_00001824.JPEG 5
ILSVRC2012_val_00001835.JPEG 8
ILSVRC2012_val_00001848.JPEG 0
ILSVRC2012_val_00001856.JPEG 4
ILSVRC2012_val_00001867.JPEG 4
ILSVRC2012_val_00001873.JPEG 8
ILSVRC2012_val_00001876.JPEG 8
ILSVRC2012_val_00001884.JPEG 8
ILSVRC2012_val_00001917.JPEG 0
ILSVRC2012_val_00001923.JPEG 0
ILSVRC2012_val_00001927.JPEG 0
ILSVRC2012_val_00001928.JPEG 5
ILSVRC2012_val_00001938.JPEG 2
ILSVRC2012_val_00001944.JPEG 0
ILSVRC2012_val_00001948.JPEG 8
ILSVRC2012_val_00001955.JPEG 0
ILSVRC2012_val_00001975.JPEG 6
ILSVRC2012_val_00001985.JPEG 7
ILSVRC2012_val_00002004.JPEG 0
ILSVRC2012_val_00002007.JPEG 8
ILSVRC2012_val_00002011.JPEG 5
ILSVRC2012_val_00002014.JPEG 8
ILSVRC2012_val_00002027.JPEG 8
ILSVRC2012_val_00002036.JPEG 1
ILSVRC2012_val_00002042.JPEG 8
ILSVRC2012_val_00002066.JPEG 0
ILSVRC2012_val_00002072.JPEG 1
ILSVRC2012_val_00002084.JPEG 5
ILSVRC2012_val_00002100.JPEG 4
ILSVRC2012_val_00002127.JPEG 8
ILSVRC2012_val_00002137.JPEG 6
ILSVRC2012_val_00002140.JPEG 5
ILSVRC2012_val_00002141.JPEG 8
ILSVRC2012_val_00002149.JPEG 6
ILSVRC2012_val_00002150.JPEG 0
ILSVRC2012_val_00002157.JPEG 7
ILSVRC2012_val_00002163.JPEG 3
ILSVRC2012_val_00002172.JPEG 4
ILSVRC2012_val_00002177.JPEG 4
ILSVRC2012_val_00002190.JPEG 7
ILSVRC2012_val_00002225.JPEG 8
ILSVRC2012_val_00002232.JPEG 3
ILSVRC2012_val_00002263.JPEG 4
ILSVRC2012_val_00002279.JPEG 8
ILSVRC2012_val_00002288.JPEG 0
ILSVRC2012_val_00002305.JPEG 8
ILSVRC2012_val_00002309.JPEG 4
ILSVRC2012_val_00002318.JPEG 0
ILSVRC2012_val_00002320.JPEG 0
ILSVRC2012_val_00002326.JPEG 4
ILSVRC2012_val_00002334.JPEG 5
ILSVRC2012_val_00002355.JPEG 3
ILSVRC2012_val_00002364.JPEG 6
ILSVRC2012_val_00002367.JPEG 5
ILSVRC2012_val_00002381.JPEG 6
ILSVRC2012_val_00002383.JPEG 4
ILSVRC2012_val_00002388.JPEG 4
ILSVRC2012_val_00002395.JPEG 4
ILSVRC2012_val_00002396.JPEG 8
ILSVRC2012_val_00002401.JPEG 6
ILSVRC2012_val_00002415.JPEG 8
ILSVRC2012_val_00002450.JPEG 5
ILSVRC2012_val_00002451.JPEG 8
ILSVRC2012_val_00002467.JPEG 4
ILSVRC2012_val_00002472.JPEG 1
ILSVRC2012_val_00002475.JPEG 1
ILSVRC2012_val_00002477.JPEG 5
ILSVRC2012_val_00002496.JPEG 7
ILSVRC2012_val_00002512.JPEG 3
ILSVRC2012_val_00002514.JPEG 3
ILSVRC2012_val_00002525.JPEG 6
ILSVRC2012_val_00002530.JPEG 5
ILSVRC2012_val_00002539.JPEG 4
ILSVRC2012_val_00002543.JPEG 5
ILSVRC2012_val_00002561.JPEG 5
ILSVRC2012_val_00002566.JPEG 8
ILSVRC2012_val_00002579.JPEG 5
ILSVRC2012_val_00002630.JPEG 0
ILSVRC2012_val_00002649.JPEG 8
ILSVRC2012_val_00002659.JPEG 1
ILSVRC2012_val_00002664.JPEG 4
ILSVRC2012_val_00002684.JPEG 7
ILSVRC2012_val_00002709.JPEG 3
ILSVRC2012_val_00002717.JPEG 5
ILSVRC2012_val_00002721.JPEG 6
ILSVRC2012_val_00002727.JPEG 8
ILSVRC2012_val_00002767.JPEG 5
ILSVRC2012_val_00002783.JPEG 3
ILSVRC2012_val_00002791.JPEG 4
ILSVRC2012_val_00002802.JPEG 4
ILSVRC2012_val_00002817.JPEG 3
ILSVRC2012_val_00002823.JPEG 1
ILSVRC2012_val_00002832.JPEG 3
ILSVRC2012_val_00002838.JPEG 4
ILSVRC2012_val_00002843.JPEG 4
ILSVRC2012_val_00002844.JPEG 8
ILSVRC2012_val_00002845.JPEG 8
ILSVRC2012_val_00002846.JPEG 4
ILSVRC2012_val_00002857.JPEG 5
ILSVRC2012_val_00002859.JPEG 6
ILSVRC2012_val_00002862.JPEG 5
ILSVRC2012_val_00002904.JPEG 8
ILSVRC2012_val_00002911.JPEG 5
ILSVRC2012_val_00002932.JPEG 3
ILSVRC2012_val_00002936.JPEG 5
ILSVRC2012_val_00002958.JPEG 0
ILSVRC2012_val_00002960.JPEG 6
ILSVRC2012_val_00002967.JPEG 1
ILSVRC2012_val_00002974.JPEG 4
ILSVRC2012_val_00002988.JPEG 0
ILSVRC2012_val_00002991.JPEG 4
ILSVRC2012_val_00002997.JPEG 4
ILSVRC2012_val_00003000.JPEG 5
ILSVRC2012_val_00003015.JPEG 4
ILSVRC2012_val_00003030.JPEG 8
ILSVRC2012_val_00003032.JPEG 8
ILSVRC2012_val_00003033.JPEG 6
ILSVRC2012_val_00003040.JPEG 4
ILSVRC2012_val_00003042.JPEG 1
ILSVRC2012_val_00003064.JPEG 4
ILSVRC2012_val_00003068.JPEG 4
ILSVRC2012_val_00003074.JPEG 7
ILSVRC2012_val_00003085.JPEG 6
ILSVRC2012_val_00003094.JPEG 6
ILSVRC2012_val_00003118.JPEG 5
ILSVRC2012_val_00003122.JPEG 4
ILSVRC2012_val_00003133.JPEG 1
ILSVRC2012_val_00003140.JPEG 0
ILSVRC2012_val_00003144.JPEG 8
ILSVRC2012_val_00003160.JPEG 3
ILSVRC2012_val_00003170.JPEG 5
ILSVRC2012_val_00003187.JPEG 5
ILSVRC2012_val_00003191.JPEG 8
ILSVRC2012_val_00003198.JPEG 0
ILSVRC2012_val_00003259.JPEG 4
ILSVRC2012_val_00003271.JPEG 4
ILSVRC2012_val_00003272.JPEG 7
ILSVRC2012_val_00003273.JPEG 3
ILSVRC2012_val_00003287.JPEG 3
ILSVRC2012_val_00003295.JPEG 1
ILSVRC2012_val_00003301.JPEG 0
ILSVRC2012_val_00003308.JPEG 7
ILSVRC2012_val_00003331.JPEG 8
ILSVRC2012_val_00003337.JPEG 5
ILSVRC2012_val_00003343.JPEG 8
ILSVRC2012_val_00003348.JPEG 4
ILSVRC2012_val_00003356.JPEG 3
ILSVRC2012_val_00003364.JPEG 4
ILSVRC2012_val_00003368.JPEG 0
ILSVRC2012_val_00003377.JPEG 0
ILSVRC2012_val_00003378.JPEG 7
ILSVRC2012_val_00003382.JPEG 1
ILSVRC2012_val_00003388.JPEG 5
ILSVRC2012_val_00003426.JPEG 5
ILSVRC2012_val_00003430.JPEG 8
ILSVRC2012_val_00003435.JPEG 0
ILSVRC2012_val_00003437.JPEG 5
ILSVRC2012_val_00003438.JPEG 5
ILSVRC2012_val_00003440.JPEG 8
ILSVRC2012_val_00003444.JPEG 8
ILSVRC2012_val_00003445.JPEG 5
ILSVRC2012_val_00003450.JPEG 4
ILSVRC2012_val_00003454.JPEG 5
ILSVRC2012_val_00003485.JPEG 0
ILSVRC2012_val_00003487.JPEG 8
ILSVRC2012_val_00003495.JPEG 6
ILSVRC2012_val_00003511.JPEG 5
ILSVRC2012_val_00003516.JPEG 0
ILSVRC2012_val_00003539.JPEG 5
ILSVRC2012_val_00003541.JPEG 5
ILSVRC2012_val_00003572.JPEG 8
ILSVRC2012_val_00003583.JPEG 0
ILSVRC2012_val_00003586.JPEG 8
ILSVRC2012_val_00003588.JPEG 4
ILSVRC2012_val_00003598.JPEG 6
ILSVRC2012_val_00003610.JPEG 6
ILSVRC2012_val_00003621.JPEG 2
ILSVRC2012_val_00003631.JPEG 5
ILSVRC2012_val_00003649.JPEG 8
ILSVRC2012_val_00003656.JPEG 8
ILSVRC2012_val_00003661.JPEG 4
ILSVRC2012_val_00003672.JPEG 4
ILSVRC2012_val_00003676.JPEG 4
ILSVRC2012_val_00003677.JPEG 8
ILSVRC2012_val_00003687.JPEG 4
ILSVRC2012_val_00003700.JPEG 5
ILSVRC2012_val_00003705.JPEG 7
ILSVRC2012_val_00003707.JPEG 4
ILSVRC2012_val_00003712.JPEG 5
ILSVRC2012_val_00003743.JPEG 4
ILSVRC2012_val_00003746.JPEG 3
ILSVRC2012_val_00003748.JPEG 2
ILSVRC2012_val_00003752.JPEG 5
ILSVRC2012_val_00003775.JPEG 4
ILSVRC2012_val_00003776.JPEG 7
ILSVRC2012_val_00003791.JPEG 0
ILSVRC2012_val_00003806.JPEG 6
ILSVRC2012_val_00003812.JPEG 5
ILSVRC2012_val_00003814.JPEG 8
ILSVRC2012_val_00003818.JPEG 5
ILSVRC2012_val_00003823.JPEG 4
ILSVRC2012_val_00003828.JPEG 4
ILSVRC2012_val_00003833.JPEG 4
ILSVRC2012_val_00003846.JPEG 2
ILSVRC2012_val_00003852.JPEG 8
ILSVRC2012_val_00003854.JPEG 8
ILSVRC2012_val_00003874.JPEG 8
ILSVRC2012_val_00003876.JPEG 8
ILSVRC2012_val_00003884.JPEG 4
ILSVRC2012_val_00003910.JPEG 0
ILSVRC2012_val_00003931.JPEG 0
ILSVRC2012_val_00003943.JPEG 5
ILSVRC2012_val_00003957.JPEG 4
ILSVRC2012_val_00003985.JPEG 2
ILSVRC2012_val_00003987.JPEG 4
ILSVRC2012_val_00003993.JPEG 8
ILSVRC2012_val_00003997.JPEG 8
ILSVRC2012_val_00004003.JPEG 5
ILSVRC2012_val_00004004.JPEG 8
ILSVRC2012_val_00004012.JPEG 4
ILSVRC2012_val_00004019.JPEG 3
ILSVRC2012_val_00004038.JPEG 5
ILSVRC2012_val_00004045.JPEG 0
ILSVRC2012_val_00004055.JPEG 6
ILSVRC2012_val_00004058.JPEG 5
ILSVRC2012_val_00004085.JPEG 0
ILSVRC2012_val_00004088.JPEG 1
ILSVRC2012_val_00004091.JPEG 8
ILSVRC2012_val_00004093.JPEG 6
ILSVRC2012_val_00004113.JPEG 7
ILSVRC2012_val_00004127.JPEG 6
ILSVRC2012_val_00004132.JPEG 8
ILSVRC2012_val_00004161.JPEG 6
ILSVRC2012_val_00004168.JPEG 5
ILSVRC2012_val_00004173.JPEG 5
ILSVRC2012_val_00004177.JPEG 8
ILSVRC2012_val_00004190.JPEG 5
ILSVRC2012_val_00004210.JPEG 8
ILSVRC2012_val_00004221.JPEG 3
ILSVRC2012_val_00004223.JPEG 0
ILSVRC2012_val_00004226.JPEG 4
ILSVRC2012_val_00004227.JPEG 5
ILSVRC2012_val_00004234.JPEG 4
ILSVRC2012_val_00004235.JPEG 4
ILSVRC2012_val_00004254.JPEG 7
ILSVRC2012_val_00004255.JPEG 8
ILSVRC2012_val_00004256.JPEG 4
ILSVRC2012_val_00004272.JPEG 5
ILSVRC2012_val_00004284.JPEG 8
ILSVRC2012_val_00004294.JPEG 5
ILSVRC2012_val_00004339.JPEG 8
ILSVRC2012_val_00004340.JPEG 4
ILSVRC2012_val_00004355.JPEG 5
ILSVRC2012_val_00004358.JPEG 0
ILSVRC2012_val_00004398.JPEG 5
ILSVRC2012_val_00004400.JPEG 7
ILSVRC2012_val_00004411.JPEG 1
ILSVRC2012_val_00004422.JPEG 1
ILSVRC2012_val_00004427.JPEG 2
ILSVRC2012_val_00004458.JPEG 5
ILSVRC2012_val_00004462.JPEG 7
ILSVRC2012_val_00004464.JPEG 6
ILSVRC2012_val_00004494.JPEG 4
ILSVRC2012_val_00004503.JPEG 4
ILSVRC2012_val_00004517.JPEG 8
ILSVRC2012_val_00004539.JPEG 0
ILSVRC2012_val_00004564.JPEG 5
ILSVRC2012_val_00004565.JPEG 6
ILSVRC2012_val_00004574.JPEG 6
ILSVRC2012_val_00004576.JPEG 6
ILSVRC2012_val_00004612.JPEG 1
ILSVRC2012_val_00004613.JPEG 2
ILSVRC2012_val_00004617.JPEG 5
ILSVRC2012_val_00004627.JPEG 4
ILSVRC2012_val_00004661.JPEG 8
ILSVRC2012_val_00004672.JPEG 6
ILSVRC2012_val_00004683.JPEG 5
ILSVRC2012_val_00004687.JPEG 0
ILSVRC2012_val_00004697.JPEG 4
ILSVRC2012_val_00004706.JPEG 8
ILSVRC2012_val_00004716.JPEG 8
ILSVRC2012_val_00004719.JPEG 1
ILSVRC2012_val_00004723.JPEG 6
ILSVRC2012_val_00004724.JPEG 2
ILSVRC2012_val_00004753.JPEG 5
ILSVRC2012_val_00004765.JPEG 8
ILSVRC2012_val_00004781.JPEG 3
ILSVRC2012_val_00004782.JPEG 0
ILSVRC2012_val_00004784.JPEG 6
ILSVRC2012_val_00004788.JPEG 5
ILSVRC2012_val_00004813.JPEG 8
ILSVRC2012_val_00004821.JPEG 1
ILSVRC2012_val_00004834.JPEG 3
ILSVRC2012_val_00004842.JPEG 5
ILSVRC2012_val_00004851.JPEG 8
ILSVRC2012_val_00004894.JPEG 1
ILSVRC2012_val_00004897.JPEG 3
ILSVRC2012_val_00004898.JPEG 3
ILSVRC2012_val_00004902.JPEG 1
ILSVRC2012_val_00004905.JPEG 6
ILSVRC2012_val_00004919.JPEG 8
ILSVRC2012_val_00004944.JPEG 4
ILSVRC2012_val_00004945.JPEG 2
ILSVRC2012_val_00004965.JPEG 7
ILSVRC2012_val_00005018.JPEG 0
ILSVRC2012_val_00005019.JPEG 0
ILSVRC2012_val_00005045.JPEG 2
ILSVRC2012_val_00005062.JPEG 6
ILSVRC2012_val_00005067.JPEG 4
ILSVRC2012_val_00005073.JPEG 0
ILSVRC2012_val_00005082.JPEG 0
ILSVRC2012_val_00005084.JPEG 7
ILSVRC2012_val_00005089.JPEG 8
ILSVRC2012_val_00005090.JPEG 5
ILSVRC2012_val_00005099.JPEG 5
ILSVRC2012_val_00005100.JPEG 4
ILSVRC2012_val_00005119.JPEG 5
ILSVRC2012_val_00005122.JPEG 7
ILSVRC2012_val_00005127.JPEG 5
ILSVRC2012_val_00005135.JPEG 5
ILSVRC2012_val_00005150.JPEG 4
ILSVRC2012_val_00005153.JPEG 5
ILSVRC2012_val_00005158.JPEG 8
ILSVRC2012_val_00005169.JPEG 8
ILSVRC2012_val_00005171.JPEG 5
ILSVRC2012_val_00005188.JPEG 6
ILSVRC2012_val_00005190.JPEG 6
ILSVRC2012_val_00005207.JPEG 1
ILSVRC2012_val_00005210.JPEG 6
ILSVRC2012_val_00005213.JPEG 6
ILSVRC2012_val_00005228.JPEG 7
ILSVRC2012_val_00005237.JPEG 8
ILSVRC2012_val_00005239.JPEG 0
ILSVRC2012_val_00005255.JPEG 0
ILSVRC2012_val_00005267.JPEG 0
ILSVRC2012_val_00005282.JPEG 4
ILSVRC2012_val_00005305.JPEG 8
ILSVRC2012_val_00005306.JPEG 5
ILSVRC2012_val_00005315.JPEG 4
ILSVRC2012_val_00005328.JPEG 4
ILSVRC2012_val_00005343.JPEG 8
ILSVRC2012_val_00005358.JPEG 1
ILSVRC2012_val_00005362.JPEG 1
ILSVRC2012_val_00005442.JPEG 5
ILSVRC2012_val_00005446.JPEG 0
ILSVRC2012_val_00005447.JPEG 4
ILSVRC2012_val_00005450.JPEG 2
ILSVRC2012_val_00005466.JPEG 1
ILSVRC2012_val_00005481.JPEG 0
ILSVRC2012_val_00005482.JPEG 8
ILSVRC2012_val_00005521.JPEG 0
ILSVRC2012_val_00005525.JPEG 5
ILSVRC2012_val_00005529.JPEG 6
ILSVRC2012_val_00005532.JPEG 2
ILSVRC2012_val_00005538.JPEG 8
ILSVRC2012_val_00005553.JPEG 4
ILSVRC2012_val_00005559.JPEG 8
ILSVRC2012_val_00005565.JPEG 5
ILSVRC2012_val_00005599.JPEG 4
ILSVRC2012_val_00005607.JPEG 0
ILSVRC2012_val_00005612.JPEG 3
ILSVRC2012_val_00005620.JPEG 5
ILSVRC2012_val_00005625.JPEG 5
ILSVRC2012_val_00005627.JPEG 1
ILSVRC2012_val_00005634.JPEG 4
ILSVRC2012_val_00005637.JPEG 5
ILSVRC2012_val_00005653.JPEG 5
ILSVRC2012_val_00005658.JPEG 0
ILSVRC2012_val_00005675.JPEG 4
ILSVRC2012_val_00005684.JPEG 6
ILSVRC2012_val_00005685.JPEG 0
ILSVRC2012_val_00005726.JPEG 5
ILSVRC2012_val_00005733.JPEG 4
ILSVRC2012_val_00005751.JPEG 4
ILSVRC2012_val_00005755.JPEG 6
ILSVRC2012_val_00005761.JPEG 5
ILSVRC2012_val_00005763.JPEG 8
ILSVRC2012_val_00005768.JPEG 2
ILSVRC2012_val_00005775.JPEG 8
ILSVRC2012_val_00005778.JPEG 8
ILSVRC2012_val_00005779.JPEG 4
ILSVRC2012_val_00005799.JPEG 3
ILSVRC2012_val_00005800.JPEG 4
ILSVRC2012_val_00005813.JPEG 5
ILSVRC2012_val_00005826.JPEG 5
ILSVRC2012_val_00005836.JPEG 7
ILSVRC2012_val_00005856.JPEG 6
ILSVRC2012_val_00005858.JPEG 8
ILSVRC2012_val_00005867.JPEG 0
ILSVRC2012_val_00005873.JPEG 4
ILSVRC2012_val_00005884.JPEG 6
ILSVRC2012_val_00005889.JPEG 7
ILSVRC2012_val_00005891.JPEG 8
ILSVRC2012_val_00005894.JPEG 8
ILSVRC2012_val_00005901.JPEG 4
ILSVRC2012_val_00005908.JPEG 4
ILSVRC2012_val_00005915.JPEG 6
ILSVRC2012_val_00005916.JPEG 8
ILSVRC2012_val_00005919.JPEG 3
ILSVRC2012_val_00005925.JPEG 4
ILSVRC2012_val_00005930.JPEG 8
ILSVRC2012_val_00005934.JPEG 5
ILSVRC2012_val_00005947.JPEG 8
ILSVRC2012_val_00005949.JPEG 6
ILSVRC2012_val_00005969.JPEG 5
ILSVRC2012_val_00005994.JPEG 0
ILSVRC2012_val_00005999.JPEG 7
ILSVRC2012_val_00006014.JPEG 5
ILSVRC2012_val_00006024.JPEG 4
ILSVRC2012_val_00006049.JPEG 4
ILSVRC2012_val_00006059.JPEG 0
ILSVRC2012_val_00006063.JPEG 0
ILSVRC2012_val_00006075.JPEG 4
ILSVRC2012_val_00006080.JPEG 6
ILSVRC2012_val_00006094.JPEG 4
ILSVRC2012_val_00006095.JPEG 8
ILSVRC2012_val_00006100.JPEG 7
ILSVRC2012_val_00006121.JPEG 8
ILSVRC2012_val_00006133.JPEG 0
ILSVRC2012_val_00006141.JPEG 5
ILSVRC2012_val_00006161.JPEG 5
ILSVRC2012_val_00006214.JPEG 6
ILSVRC2012_val_00006219.JPEG 5
ILSVRC2012_val_00006221.JPEG 4
ILSVRC2012_val_00006230.JPEG 4
ILSVRC2012_val_00006256.JPEG 5
ILSVRC2012_val_00006279.JPEG 6
ILSVRC2012_val_00006292.JPEG 6
ILSVRC2012_val_00006300.JPEG 0
ILSVRC2012_val_00006305.JPEG 3
ILSVRC2012_val_00006315.JPEG 7
ILSVRC2012_val_00006366.JPEG 6
ILSVRC2012_val_00006372.JPEG 4
ILSVRC2012_val_00006399.JPEG 4
ILSVRC2012_val_00006409.JPEG 2
ILSVRC2012_val_00006410.JPEG 5
ILSVRC2012_val_00006447.JPEG 5
ILSVRC2012_val_00006449.JPEG 4
ILSVRC2012_val_00006451.JPEG 5
ILSVRC2012_val_00006457.JPEG 4
ILSVRC2012_val_00006460.JPEG 4
ILSVRC2012_val_00006469.JPEG 4
ILSVRC2012_val_00006498.JPEG 5
ILSVRC2012_val_00006501.JPEG 8
ILSVRC2012_val_00006529.JPEG 8
ILSVRC2012_val_00006531.JPEG 0
ILSVRC2012_val_00006532.JPEG 8
ILSVRC2012_val_00006541.JPEG 5
ILSVRC2012_val_00006547.JPEG 6
ILSVRC2012_val_00006555.JPEG 4
ILSVRC2012_val_00006562.JPEG 4
ILSVRC2012_val_00006585.JPEG 0
ILSVRC2012_val_00006595.JPEG 8
ILSVRC2012_val_00006599.JPEG 5
ILSVRC2012_val_00006609.JPEG 0
ILSVRC2012_val_00006614.JPEG 8
ILSVRC2012_val_00006626.JPEG 4
ILSVRC2012_val_00006634.JPEG 3
ILSVRC2012_val_00006687.JPEG 4
ILSVRC2012_val_00006715.JPEG 4
ILSVRC2012_val_00006716.JPEG 4
ILSVRC2012_val_00006730.JPEG 8
ILSVRC2012_val_00006758.JPEG 5
ILSVRC2012_val_00006760.JPEG 8
ILSVRC2012_val_00006775.JPEG 5
ILSVRC2012_val_00006790.JPEG 4
ILSVRC2012_val_00006791.JPEG 5
ILSVRC2012_val_00006823.JPEG 8
ILSVRC2012_val_00006827.JPEG 0
ILSVRC2012_val_00006830.JPEG 2
ILSVRC2012_val_00006833.JPEG 6
ILSVRC2012_val_00006847.JPEG 4
ILSVRC2012_val_00006857.JPEG 0
ILSVRC2012_val_00006867.JPEG 8
ILSVRC2012_val_00006875.JPEG 5
ILSVRC2012_val_00006883.JPEG 8
ILSVRC2012_val_00006901.JPEG 8
ILSVRC2012_val_00006908.JPEG 6
ILSVRC2012_val_00006915.JPEG 8
ILSVRC2012_val_00006928.JPEG 4
ILSVRC2012_val_00006931.JPEG 5
ILSVRC2012_val_00006945.JPEG 5
ILSVRC2012_val_00006966.JPEG 8
ILSVRC2012_val_00006987.JPEG 2
ILSVRC2012_val_00007006.JPEG 1
ILSVRC2012_val_00007008.JPEG 5
ILSVRC2012_val_00007010.JPEG 5
ILSVRC2012_val_00007023.JPEG 1
ILSVRC2012_val_00007044.JPEG 3
ILSVRC2012_val_00007081.JPEG 4
ILSVRC2012_val_00007082.JPEG 8
ILSVRC2012_val_00007090.JPEG 0
ILSVRC2012_val_00007126.JPEG 4
ILSVRC2012_val_00007130.JPEG 8
ILSVRC2012_val_00007139.JPEG 4
ILSVRC2012_val_00007143.JPEG 8
ILSVRC2012_val_00007151.JPEG 5
ILSVRC2012_val_00007152.JPEG 8
ILSVRC2012_val_00007156.JPEG 4
ILSVRC2012_val_00007163.JPEG 6
ILSVRC2012_val_00007168.JPEG 4
ILSVRC2012_val_00007174.JPEG 5
ILSVRC2012_val_00007182.JPEG 5
ILSVRC2012_val_00007185.JPEG 6
ILSVRC2012_val_00007188.JPEG 5
ILSVRC2012_val_00007196.JPEG 5
ILSVRC2012_val_00007204.JPEG 5
ILSVRC2012_val_00007230.JPEG 3
ILSVRC2012_val_00007284.JPEG 4
ILSVRC2012_val_00007297.JPEG 5
ILSVRC2012_val_00007303.JPEG 1
ILSVRC2012_val_00007312.JPEG 4
ILSVRC2012_val_00007323.JPEG 4
ILSVRC2012_val_00007327.JPEG 0
ILSVRC2012_val_00007343.JPEG 4
ILSVRC2012_val_00007350.JPEG 8
ILSVRC2012_val_00007365.JPEG 8
ILSVRC2012_val_00007366.JPEG 0
ILSVRC2012_val_00007370.JPEG 7
ILSVRC2012_val_00007375.JPEG 8
ILSVRC2012_val_00007387.JPEG 4
ILSVRC2012_val_00007390.JPEG 4
ILSVRC2012_val_00007394.JPEG 6
ILSVRC2012_val_00007398.JPEG 2
ILSVRC2012_val_00007423.JPEG 4
ILSVRC2012_val_00007425.JPEG 8
ILSVRC2012_val_00007426.JPEG 5
ILSVRC2012_val_00007429.JPEG 8
ILSVRC2012_val_00007437.JPEG 2
ILSVRC2012_val_00007452.JPEG 0
ILSVRC2012_val_00007455.JPEG 5
ILSVRC2012_val_00007456.JPEG 5
ILSVRC2012_val_00007474.JPEG 4
ILSVRC2012_val_00007497.JPEG 0
ILSVRC2012_val_00007506.JPEG 5
ILSVRC2012_val_00007520.JPEG 8
ILSVRC2012_val_00007529.JPEG 8
ILSVRC2012_val_00007542.JPEG 0
ILSVRC2012_val_00007549.JPEG 8
ILSVRC2012_val_00007551.JPEG 0
ILSVRC2012_val_00007574.JPEG 2
ILSVRC2012_val_00007576.JPEG 4
ILSVRC2012_val_00007588.JPEG 5
ILSVRC2012_val_00007589.JPEG 8
ILSVRC2012_val_00007591.JPEG 4
ILSVRC2012_val_00007595.JPEG 0
ILSVRC2012_val_00007602.JPEG 6
ILSVRC2012_val_00007604.JPEG 5
ILSVRC2012_val_00007619.JPEG 5
ILSVRC2012_val_00007630.JPEG 4
ILSVRC2012_val_00007636.JPEG 6
ILSVRC2012_val_00007639.JPEG 5
ILSVRC2012_val_00007664.JPEG 4
ILSVRC2012_val_00007676.JPEG 1
ILSVRC2012_val_00007678.JPEG 8
ILSVRC2012_val_00007696.JPEG 8
ILSVRC2012_val_00007700.JPEG 4
ILSVRC2012_val_00007725.JPEG 5
ILSVRC2012_val_00007738.JPEG 6
ILSVRC2012_val_00007769.JPEG 7
ILSVRC2012_val_00007778.JPEG 4
ILSVRC2012_val_00007788.JPEG 5
ILSVRC2012_val_00007793.JPEG 4
ILSVRC2012_val_00007807.JPEG 6
ILSVRC2012_val_00007808.JPEG 1
ILSVRC2012_val_00007818.JPEG 2
ILSVRC2012_val_00007828.JPEG 0
ILSVRC2012_val_00007845.JPEG 5
ILSVRC2012_val_00007863.JPEG 8
ILSVRC2012_val_00007871.JPEG 4
ILSVRC2012_val_00007891.JPEG 8
ILSVRC2012_val_00007895.JPEG 6
ILSVRC2012_val_00007916.JPEG 8
ILSVRC2012_val_00007932.JPEG 4
ILSVRC2012_val_00007960.JPEG 5
ILSVRC2012_val_00007973.JPEG 4
ILSVRC2012_val_00007977.JPEG 2
ILSVRC2012_val_00007979.JPEG 6
ILSVRC2012_val_00007986.JPEG 4
ILSVRC2012_val_00007999.JPEG 7
ILSVRC2012_val_00008000.JPEG 0
ILSVRC2012_val_00008001.JPEG 8
ILSVRC2012_val_00008008.JPEG 4
ILSVRC2012_val_00008014.JPEG 5
ILSVRC2012_val_00008017.JPEG 5
ILSVRC2012_val_00008038.JPEG 8
ILSVRC2012_val_00008059.JPEG 6
ILSVRC2012_val_00008069.JPEG 8
ILSVRC2012_val_00008074.JPEG 5
ILSVRC2012_val_00008092.JPEG 5
ILSVRC2012_val_00008134.JPEG 5
ILSVRC2012_val_00008137.JPEG 0
ILSVRC2012_val_00008140.JPEG 8
ILSVRC2012_val_00008154.JPEG 5
ILSVRC2012_val_00008155.JPEG 4
ILSVRC2012_val_00008175.JPEG 5
ILSVRC2012_val_00008179.JPEG 5
ILSVRC2012_val_00008184.JPEG 6
ILSVRC2012_val_00008186.JPEG 4
ILSVRC2012_val_00008188.JPEG 5
ILSVRC2012_val_00008189.JPEG 6
ILSVRC2012_val_00008198.JPEG 0
ILSVRC2012_val_00008201.JPEG 0
ILSVRC2012_val_00008204.JPEG 5
ILSVRC2012_val_00008210.JPEG 7
ILSVRC2012_val_00008212.JPEG 6
ILSVRC2012_val_00008221.JPEG 4
ILSVRC2012_val_00008228.JPEG 5
ILSVRC2012_val_00008236.JPEG 4
ILSVRC2012_val_00008245.JPEG 4
ILSVRC2012_val_00008256.JPEG 5
ILSVRC2012_val_00008282.JPEG 0
ILSVRC2012_val_00008320.JPEG 0
ILSVRC2012_val_00008327.JPEG 3
ILSVRC2012_val_00008330.JPEG 5
ILSVRC2012_val_00008333.JPEG 3
ILSVRC2012_val_00008351.JPEG 5
ILSVRC2012_val_00008368.JPEG 0
ILSVRC2012_val_00008373.JPEG 6
ILSVRC2012_val_00008393.JPEG 8
ILSVRC2012_val_00008428.JPEG 5
ILSVRC2012_val_00008436.JPEG 6
ILSVRC2012_val_00008448.JPEG 6
ILSVRC2012_val_00008449.JPEG 5
ILSVRC2012_val_00008484.JPEG 5
ILSVRC2012_val_00008487.JPEG 0
ILSVRC2012_val_00008488.JPEG 0
ILSVRC2012_val_00008490.JPEG 6
ILSVRC2012_val_00008491.JPEG 1
ILSVRC2012_val_00008527.JPEG 0
ILSVRC2012_val_00008539.JPEG 5
ILSVRC2012_val_00008549.JPEG 4
ILSVRC2012_val_00008550.JPEG 5
ILSVRC2012_val_00008566.JPEG 4
ILSVRC2012_val_00008593.JPEG 4
ILSVRC2012_val_00008604.JPEG 6
ILSVRC2012_val_00008615.JPEG 5
ILSVRC2012_val_00008619.JPEG 0
ILSVRC2012_val_00008626.JPEG 4
ILSVRC2012_val_00008634.JPEG 8
ILSVRC2012_val_00008639.JPEG 0
ILSVRC2012_val_00008682.JPEG 5
ILSVRC2012_val_00008697.JPEG 8
ILSVRC2012_val_00008705.JPEG 7
ILSVRC2012_val_00008706.JPEG 8
ILSVRC2012_val_00008724.JPEG 6
ILSVRC2012_val_00008727.JPEG 0
ILSVRC2012_val_00008730.JPEG 6
ILSVRC2012_val_00008731.JPEG 6
ILSVRC2012_val_00008746.JPEG 4
ILSVRC2012_val_00008778.JPEG 1
ILSVRC2012_val_00008798.JPEG 8
ILSVRC2012_val_00008813.JPEG 0
ILSVRC2012_val_00008826.JPEG 8
ILSVRC2012_val_00008834.JPEG 4
ILSVRC2012_val_00008847.JPEG 6
ILSVRC2012_val_00008858.JPEG 8
ILSVRC2012_val_00008859.JPEG 0
ILSVRC2012_val_00008870.JPEG 7
ILSVRC2012_val_00008873.JPEG 5
ILSVRC2012_val_00008876.JPEG 1
ILSVRC2012_val_00008877.JPEG 5
ILSVRC2012_val_00008878.JPEG 5
ILSVRC2012_val_00008889.JPEG 5
ILSVRC2012_val_00008902.JPEG 3
ILSVRC2012_val_00008921.JPEG 3
ILSVRC2012_val_00008926.JPEG 0
ILSVRC2012_val_00008931.JPEG 8
ILSVRC2012_val_00008941.JPEG 8
ILSVRC2012_val_00008944.JPEG 0
ILSVRC2012_val_00008973.JPEG 0
ILSVRC2012_val_00008975.JPEG 0
ILSVRC2012_val_00008986.JPEG 1
ILSVRC2012_val_00008987.JPEG 7
ILSVRC2012_val_00008993.JPEG 4
ILSVRC2012_val_00009002.JPEG 8
ILSVRC2012_val_00009012.JPEG 5
ILSVRC2012_val_00009019.JPEG 0
ILSVRC2012_val_00009045.JPEG 0
ILSVRC2012_val_00009090.JPEG 8
ILSVRC2012_val_00009091.JPEG 4
ILSVRC2012_val_00009110.JPEG 6
ILSVRC2012_val_00009125.JPEG 1
ILSVRC2012_val_00009145.JPEG 4
ILSVRC2012_val_00009146.JPEG 4
ILSVRC2012_val_00009148.JPEG 0
ILSVRC2012_val_00009157.JPEG 0
ILSVRC2012_val_00009165.JPEG 6
ILSVRC2012_val_00009190.JPEG 0
ILSVRC2012_val_00009194.JPEG 4
ILSVRC2012_val_00009226.JPEG 4
ILSVRC2012_val_00009231.JPEG 3
ILSVRC2012_val_00009240.JPEG 6
ILSVRC2012_val_00009273.JPEG 6
ILSVRC2012_val_00009275.JPEG 8
ILSVRC2012_val_00009282.JPEG 8
ILSVRC2012_val_00009283.JPEG 5
ILSVRC2012_val_00009291.JPEG 0
ILSVRC2012_val_00009303.JPEG 5
ILSVRC2012_val_00009307.JPEG 6
ILSVRC2012_val_00009321.JPEG 8
ILSVRC2012_val_00009332.JPEG 8
ILSVRC2012_val_00009349.JPEG 5
ILSVRC2012_val_00009359.JPEG 5
ILSVRC2012_val_00009376.JPEG 3
ILSVRC2012_val_00009381.JPEG 5
ILSVRC2012_val_00009387.JPEG 8
ILSVRC2012_val_00009390.JPEG 5
ILSVRC2012_val_00009419.JPEG 4
ILSVRC2012_val_00009426.JPEG 6
ILSVRC2012_val_00009427.JPEG 0
ILSVRC2012_val_00009439.JPEG 0
ILSVRC2012_val_00009445.JPEG 8
ILSVRC2012_val_00009446.JPEG 7
ILSVRC2012_val_00009459.JPEG 6
ILSVRC2012_val_00009461.JPEG 5
ILSVRC2012_val_00009476.JPEG 0
ILSVRC2012_val_00009484.JPEG 3
ILSVRC2012_val_00009491.JPEG 5
ILSVRC2012_val_00009508.JPEG 3
ILSVRC2012_val_00009511.JPEG 5
ILSVRC2012_val_00009519.JPEG 5
ILSVRC2012_val_00009533.JPEG 6
ILSVRC2012_val_00009536.JPEG 4
ILSVRC2012_val_00009560.JPEG 5
ILSVRC2012_val_00009562.JPEG 4
ILSVRC2012_val_00009563.JPEG 2
ILSVRC2012_val_00009565.JPEG 4
ILSVRC2012_val_00009572.JPEG 6
ILSVRC2012_val_00009574.JPEG 5
ILSVRC2012_val_00009583.JPEG 4
ILSVRC2012_val_00009590.JPEG 4
ILSVRC2012_val_00009594.JPEG 1
ILSVRC2012_val_00009610.JPEG 4
ILSVRC2012_val_00009611.JPEG 5
ILSVRC2012_val_00009617.JPEG 6
ILSVRC2012_val_00009626.JPEG 8
ILSVRC2012_val_00009635.JPEG 8
ILSVRC2012_val_00009639.JPEG 3
ILSVRC2012_val_00009645.JPEG 5
ILSVRC2012_val_00009647.JPEG 4
ILSVRC2012_val_00009649.JPEG 4
ILSVRC2012_val_00009673.JPEG 0
ILSVRC2012_val_00009679.JPEG 4
ILSVRC2012_val_00009682.JPEG 5
ILSVRC2012_val_00009683.JPEG 1
ILSVRC2012_val_00009697.JPEG 7
ILSVRC2012_val_00009701.JPEG 5
ILSVRC2012_val_00009720.JPEG 8
ILSVRC2012_val_00009748.JPEG 6
ILSVRC2012_val_00009752.JPEG 4
ILSVRC2012_val_00009755.JPEG 0
ILSVRC2012_val_00009757.JPEG 0
ILSVRC2012_val_00009764.JPEG 0
ILSVRC2012_val_00009775.JPEG 0
ILSVRC2012_val_00009781.JPEG 4
ILSVRC2012_val_00009799.JPEG 5
ILSVRC2012_val_00009811.JPEG 4
ILSVRC2012_val_00009819.JPEG 3
ILSVRC2012_val_00009827.JPEG 4
ILSVRC2012_val_00009830.JPEG 5
ILSVRC2012_val_00009832.JPEG 5
ILSVRC2012_val_00009841.JPEG 4
ILSVRC2012_val_00009846.JPEG 5
ILSVRC2012_val_00009852.JPEG 4
ILSVRC2012_val_00009857.JPEG 4
ILSVRC2012_val_00009870.JPEG 4
ILSVRC2012_val_00009888.JPEG 0
ILSVRC2012_val_00009889.JPEG 3
ILSVRC2012_val_00009899.JPEG 1
ILSVRC2012_val_00009912.JPEG 8
ILSVRC2012_val_00009918.JPEG 8
ILSVRC2012_val_00009921.JPEG 1
ILSVRC2012_val_00009925.JPEG 5
ILSVRC2012_val_00009943.JPEG 8
ILSVRC2012_val_00009945.JPEG 8
ILSVRC2012_val_00009947.JPEG 5
ILSVRC2012_val_00009955.JPEG 5
ILSVRC2012_val_00009964.JPEG 1
ILSVRC2012_val_00009974.JPEG 4
ILSVRC2012_val_00009982.JPEG 6
ILSVRC2012_val_00009994.JPEG 4
ILSVRC2012_val_00009998.JPEG 4
ILSVRC2012_val_00010011.JPEG 0
ILSVRC2012_val_00010023.JPEG 5
ILSVRC2012_val_00010028.JPEG 8
ILSVRC2012_val_00010031.JPEG 0
ILSVRC2012_val_00010035.JPEG 4
ILSVRC2012_val_00010041.JPEG 6
ILSVRC2012_val_00010051.JPEG 7
ILSVRC2012_val_00010076.JPEG 6
ILSVRC2012_val_00010077.JPEG 5
ILSVRC2012_val_00010090.JPEG 4
ILSVRC2012_val_00010098.JPEG 0
ILSVRC2012_val_00010145.JPEG 3
ILSVRC2012_val_00010150.JPEG 8
ILSVRC2012_val_00010156.JPEG 4
ILSVRC2012_val_00010161.JPEG 6
ILSVRC2012_val_00010163.JPEG 0
ILSVRC2012_val_00010182.JPEG 5
ILSVRC2012_val_00010192.JPEG 8
ILSVRC2012_val_00010198.JPEG 8
ILSVRC2012_val_00010212.JPEG 5
ILSVRC2012_val_00010218.JPEG 1
ILSVRC2012_val_00010231.JPEG 8
ILSVRC2012_val_00010233.JPEG 5
ILSVRC2012_val_00010258.JPEG 4
ILSVRC2012_val_00010287.JPEG 2
ILSVRC2012_val_00010292.JPEG 8
ILSVRC2012_val_00010323.JPEG 5
ILSVRC2012_val_00010340.JPEG 5
ILSVRC2012_val_00010373.JPEG 0
ILSVRC2012_val_00010386.JPEG 3
ILSVRC2012_val_00010388.JPEG 4
ILSVRC2012_val_00010389.JPEG 1
ILSVRC2012_val_00010397.JPEG 4
ILSVRC2012_val_00010411.JPEG 8
ILSVRC2012_val_00010412.JPEG 7
ILSVRC2012_val_00010417.JPEG 1
ILSVRC2012_val_00010421.JPEG 4
ILSVRC2012_val_00010424.JPEG 8
ILSVRC2012_val_00010436.JPEG 1
ILSVRC2012_val_00010454.JPEG 5
ILSVRC2012_val_00010477.JPEG 4
ILSVRC2012_val_00010478.JPEG 6
ILSVRC2012_val_00010482.JPEG 5
ILSVRC2012_val_00010494.JPEG 8
ILSVRC2012_val_00010507.JPEG 4
ILSVRC2012_val_00010528.JPEG 3
ILSVRC2012_val_00010551.JPEG 5
ILSVRC2012_val_00010555.JPEG 7
ILSVRC2012_val_00010562.JPEG 8
ILSVRC2012_val_00010564.JPEG 6
ILSVRC2012_val_00010570.JPEG 4
ILSVRC2012_val_00010571.JPEG 6
ILSVRC2012_val_00010576.JPEG 5
ILSVRC2012_val_00010583.JPEG 5
ILSVRC2012_val_00010593.JPEG 2
ILSVRC2012_val_00010598.JPEG 1
ILSVRC2012_val_00010603.JPEG 6
ILSVRC2012_val_00010610.JPEG 8
ILSVRC2012_val_00010624.JPEG 0
ILSVRC2012_val_00010639.JPEG 7
ILSVRC2012_val_00010653.JPEG 8
ILSVRC2012_val_00010663.JPEG 5
ILSVRC2012_val_00010669.JPEG 3
ILSVRC2012_val_00010678.JPEG 8
ILSVRC2012_val_00010683.JPEG 6
ILSVRC2012_val_00010697.JPEG 0
ILSVRC2012_val_00010711.JPEG 1
ILSVRC2012_val_00010714.JPEG 4
ILSVRC2012_val_00010725.JPEG 7
ILSVRC2012_val_00010738.JPEG 6
ILSVRC2012_val_00010774.JPEG 8
ILSVRC2012_val_00010784.JPEG 5
ILSVRC2012_val_00010792.JPEG 3
ILSVRC2012_val_00010810.JPEG 4
ILSVRC2012_val_00010825.JPEG 6
ILSVRC2012_val_00010843.JPEG 3
ILSVRC2012_val_00010853.JPEG 5
ILSVRC2012_val_00010854.JPEG 5
ILSVRC2012_val_00010874.JPEG 7
ILSVRC2012_val_00010888.JPEG 8
ILSVRC2012_val_00010915.JPEG 3
ILSVRC2012_val_00010917.JPEG 4
ILSVRC2012_val_00010925.JPEG 8
ILSVRC2012_val_00010936.JPEG 6
ILSVRC2012_val_00010938.JPEG 5
ILSVRC2012_val_00010952.JPEG 8
ILSVRC2012_val_00010995.JPEG 1
ILSVRC2012_val_00011009.JPEG 0
ILSVRC2012_val_00011011.JPEG 4
ILSVRC2012_val_00011013.JPEG 8
ILSVRC2012_val_00011015.JPEG 1
ILSVRC2012_val_00011032.JPEG 5
ILSVRC2012_val_00011039.JPEG 5
ILSVRC2012_val_00011058.JPEG 5
ILSVRC2012_val_00011063.JPEG 0
ILSVRC2012_val_00011070.JPEG 7
ILSVRC2012_val_00011071.JPEG 7
ILSVRC2012_val_00011077.JPEG 0
ILSVRC2012_val_00011079.JPEG 8
ILSVRC2012_val_00011085.JPEG 8
ILSVRC2012_val_00011087.JPEG 7
ILSVRC2012_val_00011101.JPEG 5
ILSVRC2012_val_00011112.JPEG 8
ILSVRC2012_val_00011123.JPEG 6
ILSVRC2012_val_00011137.JPEG 7
ILSVRC2012_val_00011142.JPEG 1
ILSVRC2012_val_00011150.JPEG 3
ILSVRC2012_val_00011165.JPEG 0
ILSVRC2012_val_00011167.JPEG 8
ILSVRC2012_val_00011181.JPEG 8
ILSVRC2012_val_00011184.JPEG 0
ILSVRC2012_val_00011190.JPEG 4
ILSVRC2012_val_00011202.JPEG 0
ILSVRC2012_val_00011222.JPEG 4
ILSVRC2012_val_00011228.JPEG 6
ILSVRC2012_val_00011237.JPEG 4
ILSVRC2012_val_00011240.JPEG 0
ILSVRC2012_val_00011245.JPEG 5
ILSVRC2012_val_00011256.JPEG 5
ILSVRC2012_val_00011258.JPEG 0
ILSVRC2012_val_00011281.JPEG 5
ILSVRC2012_val_00011303.JPEG 2
ILSVRC2012_val_00011315.JPEG 4
ILSVRC2012_val_00011321.JPEG 6
ILSVRC2012_val_00011375.JPEG 4
ILSVRC2012_val_00011382.JPEG 8
ILSVRC2012_val_00011393.JPEG 8
ILSVRC2012_val_00011396.JPEG 5
ILSVRC2012_val_00011399.JPEG 4
ILSVRC2012_val_00011419.JPEG 6
ILSVRC2012_val_00011425.JPEG 5
ILSVRC2012_val_00011444.JPEG 3
ILSVRC2012_val_00011453.JPEG 7
ILSVRC2012_val_00011473.JPEG 0
ILSVRC2012_val_00011482.JPEG 5
ILSVRC2012_val_00011488.JPEG 4
ILSVRC2012_val_00011489.JPEG 4
ILSVRC2012_val_00011520.JPEG 5
ILSVRC2012_val_00011523.JPEG 5
ILSVRC2012_val_00011525.JPEG 7
ILSVRC2012_val_00011528.JPEG 1
ILSVRC2012_val_00011530.JPEG 3
ILSVRC2012_val_00011532.JPEG 6
ILSVRC2012_val_00011535.JPEG 8
ILSVRC2012_val_00011544.JPEG 6
ILSVRC2012_val_00011554.JPEG 4
ILSVRC2012_val_00011576.JPEG 6
ILSVRC2012_val_00011584.JPEG 4
ILSVRC2012_val_00011585.JPEG 7
ILSVRC2012_val_00011592.JPEG 5
ILSVRC2012_val_00011601.JPEG 8
ILSVRC2012_val_00011605.JPEG 4
ILSVRC2012_val_00011617.JPEG 8
ILSVRC2012_val_00011621.JPEG 4
ILSVRC2012_val_00011633.JPEG 6
ILSVRC2012_val_00011637.JPEG 6
ILSVRC2012_val_00011664.JPEG 2
ILSVRC2012_val_00011669.JPEG 8
ILSVRC2012_val_00011686.JPEG 4
ILSVRC2012_val_00011694.JPEG 6
ILSVRC2012_val_00011697.JPEG 4
ILSVRC2012_val_00011706.JPEG 0
ILSVRC2012_val_00011724.JPEG 2
ILSVRC2012_val_00011738.JPEG 1
ILSVRC2012_val_00011744.JPEG 8
ILSVRC2012_val_00011766.JPEG 3
ILSVRC2012_val_00011778.JPEG 4
ILSVRC2012_val_00011783.JPEG 8
ILSVRC2012_val_00011787.JPEG 4
ILSVRC2012_val_00011789.JPEG 5
ILSVRC2012_val_00011820.JPEG 8
ILSVRC2012_val_00011822.JPEG 4
ILSVRC2012_val_00011837.JPEG 0
ILSVRC2012_val_00011845.JPEG 8
ILSVRC2012_val_00011846.JPEG 6
ILSVRC2012_val_00011851.JPEG 4
ILSVRC2012_val_00011854.JPEG 1
ILSVRC2012_val_00011867.JPEG 8
ILSVRC2012_val_00011874.JPEG 4
ILSVRC2012_val_00011888.JPEG 8
ILSVRC2012_val_00011889.JPEG 8
ILSVRC2012_val_00011894.JPEG 4
ILSVRC2012_val_00011895.JPEG 0
ILSVRC2012_val_00011898.JPEG 5
ILSVRC2012_val_00011899.JPEG 8
ILSVRC2012_val_00011904.JPEG 5
ILSVRC2012_val_00011913.JPEG 5
ILSVRC2012_val_00011922.JPEG 7
ILSVRC2012_val_00011932.JPEG 8
ILSVRC2012_val_00011943.JPEG 4
ILSVRC2012_val_00011952.JPEG 1
ILSVRC2012_val_00011966.JPEG 8
ILSVRC2012_val_00011973.JPEG 8
ILSVRC2012_val_00011996.JPEG 3
ILSVRC2012_val_00011998.JPEG 5
ILSVRC2012_val_00012003.JPEG 4
ILSVRC2012_val_00012004.JPEG 0
ILSVRC2012_val_00012005.JPEG 6
ILSVRC2012_val_00012017.JPEG 5
ILSVRC2012_val_00012024.JPEG 4
ILSVRC2012_val_00012041.JPEG 0
ILSVRC2012_val_00012044.JPEG 5
ILSVRC2012_val_00012045.JPEG 8
ILSVRC2012_val_00012067.JPEG 0
ILSVRC2012_val_00012074.JPEG 0
ILSVRC2012_val_00012087.JPEG 3
ILSVRC2012_val_00012089.JPEG 4
ILSVRC2012_val_00012102.JPEG 8
ILSVRC2012_val_00012106.JPEG 8
ILSVRC2012_val_00012122.JPEG 4
ILSVRC2012_val_00012123.JPEG 4
ILSVRC2012_val_00012124.JPEG 8
ILSVRC2012_val_00012127.JPEG 8
ILSVRC2012_val_00012138.JPEG 6
ILSVRC2012_val_00012151.JPEG 2
ILSVRC2012_val_00012167.JPEG 5
ILSVRC2012_val_00012173.JPEG 1
ILSVRC2012_val_00012177.JPEG 6
ILSVRC2012_val_00012179.JPEG 6
ILSVRC2012_val_00012190.JPEG 4
ILSVRC2012_val_00012204.JPEG 5
ILSVRC2012_val_00012223.JPEG 4
ILSVRC2012_val_00012231.JPEG 2
ILSVRC2012_val_00012238.JPEG 6
ILSVRC2012_val_00012241.JPEG 6
ILSVRC2012_val_00012247.JPEG 5
ILSVRC2012_val_00012248.JPEG 2
ILSVRC2012_val_00012253.JPEG 5
ILSVRC2012_val_00012268.JPEG 8
ILSVRC2012_val_00012294.JPEG 8
ILSVRC2012_val_00012307.JPEG 4
ILSVRC2012_val_00012314.JPEG 4
ILSVRC2012_val_00012339.JPEG 1
ILSVRC2012_val_00012359.JPEG 5
ILSVRC2012_val_00012377.JPEG 1
ILSVRC2012_val_00012384.JPEG 5
ILSVRC2012_val_00012395.JPEG 0
ILSVRC2012_val_00012410.JPEG 4
ILSVRC2012_val_00012428.JPEG 2
ILSVRC2012_val_00012430.JPEG 0
ILSVRC2012_val_00012488.JPEG 4
ILSVRC2012_val_00012496.JPEG 5
ILSVRC2012_val_00012508.JPEG 4
ILSVRC2012_val_00012516.JPEG 0
ILSVRC2012_val_00012527.JPEG 0
ILSVRC2012_val_00012551.JPEG 1
ILSVRC2012_val_00012558.JPEG 2
ILSVRC2012_val_00012568.JPEG 5
ILSVRC2012_val_00012586.JPEG 4
ILSVRC2012_val_00012601.JPEG 4
ILSVRC2012_val_00012629.JPEG 8
ILSVRC2012_val_00012657.JPEG 0
ILSVRC2012_val_00012664.JPEG 5
ILSVRC2012_val_00012669.JPEG 4
ILSVRC2012_val_00012677.JPEG 8
ILSVRC2012_val_00012697.JPEG 5
ILSVRC2012_val_00012711.JPEG 5
ILSVRC2012_val_00012713.JPEG 7
ILSVRC2012_val_00012717.JPEG 0
ILSVRC2012_val_00012721.JPEG 4
ILSVRC2012_val_00012722.JPEG 6
ILSVRC2012_val_00012723.JPEG 5
ILSVRC2012_val_00012727.JPEG 6
ILSVRC2012_val_00012732.JPEG 3
ILSVRC2012_val_00012736.JPEG 0
ILSVRC2012_val_00012743.JPEG 5
ILSVRC2012_val_00012746.JPEG 3
ILSVRC2012_val_00012774.JPEG 8
ILSVRC2012_val_00012779.JPEG 7
ILSVRC2012_val_00012782.JPEG 5
ILSVRC2012_val_00012793.JPEG 5
ILSVRC2012_val_00012798.JPEG 1
ILSVRC2012_val_00012825.JPEG 8
ILSVRC2012_val_00012829.JPEG 3
ILSVRC2012_val_00012830.JPEG 5
ILSVRC2012_val_00012845.JPEG 8
ILSVRC2012_val_00012864.JPEG 4
ILSVRC2012_val_00012894.JPEG 8
ILSVRC2012_val_00012928.JPEG 0
ILSVRC2012_val_00012931.JPEG 0
ILSVRC2012_val_00012962.JPEG 7
ILSVRC2012_val_00012975.JPEG 1
ILSVRC2012_val_00012982.JPEG 6
ILSVRC2012_val_00012986.JPEG 8
ILSVRC2012_val_00013008.JPEG 4
ILSVRC2012_val_00013015.JPEG 5
ILSVRC2012_val_00013045.JPEG 0
ILSVRC2012_val_00013049.JPEG 5
ILSVRC2012_val_00013064.JPEG 6
ILSVRC2012_val_00013076.JPEG 5
ILSVRC2012_val_00013078.JPEG 8
ILSVRC2012_val_00013085.JPEG 4
ILSVRC2012_val_00013111.JPEG 4
ILSVRC2012_val_00013121.JPEG 6
ILSVRC2012_val_00013151.JPEG 5
ILSVRC2012_val_00013153.JPEG 8
ILSVRC2012_val_00013175.JPEG 5
ILSVRC2012_val_00013183.JPEG 7
ILSVRC2012_val_00013189.JPEG 6
ILSVRC2012_val_00013201.JPEG 2
ILSVRC2012_val_00013212.JPEG 4
ILSVRC2012_val_00013220.JPEG 4
ILSVRC2012_val_00013229.JPEG 4
ILSVRC2012_val_00013264.JPEG 5
ILSVRC2012_val_00013280.JPEG 5
ILSVRC2012_val_00013299.JPEG 3
ILSVRC2012_val_00013301.JPEG 3
ILSVRC2012_val_00013309.JPEG 0
ILSVRC2012_val_00013314.JPEG 8
ILSVRC2012_val_00013343.JPEG 4
ILSVRC2012_val_00013351.JPEG 8
ILSVRC2012_val_00013354.JPEG 2
ILSVRC2012_val_00013355.JPEG 0
ILSVRC2012_val_00013360.JPEG 6
ILSVRC2012_val_00013364.JPEG 4
ILSVRC2012_val_00013377.JPEG 7
ILSVRC2012_val_00013378.JPEG 4
ILSVRC2012_val_00013394.JPEG 3
ILSVRC2012_val_00013395.JPEG 8
ILSVRC2012_val_00013410.JPEG 1
ILSVRC2012_val_00013420.JPEG 5
ILSVRC2012_val_00013422.JPEG 8
ILSVRC2012_val_00013423.JPEG 7
ILSVRC2012_val_00013434.JPEG 4
ILSVRC2012_val_00013460.JPEG 4
ILSVRC2012_val_00013494.JPEG 1
ILSVRC2012_val_00013521.JPEG 4
ILSVRC2012_val_00013525.JPEG 7
ILSVRC2012_val_00013535.JPEG 8
ILSVRC2012_val_00013541.JPEG 5
ILSVRC2012_val_00013550.JPEG 1
ILSVRC2012_val_00013552.JPEG 8
ILSVRC2012_val_00013557.JPEG 0
ILSVRC2012_val_00013564.JPEG 4
ILSVRC2012_val_00013596.JPEG 6
ILSVRC2012_val_00013607.JPEG 4
ILSVRC2012_val_00013610.JPEG 4
ILSVRC2012_val_00013618.JPEG 7
ILSVRC2012_val_00013641.JPEG 4
ILSVRC2012_val_00013661.JPEG 6
ILSVRC2012_val_00013672.JPEG 3
ILSVRC2012_val_00013673.JPEG 1
ILSVRC2012_val_00013675.JPEG 3
ILSVRC2012_val_00013684.JPEG 1
ILSVRC2012_val_00013708.JPEG 8
ILSVRC2012_val_00013713.JPEG 4
ILSVRC2012_val_00013738.JPEG 3
ILSVRC2012_val_00013739.JPEG 4
ILSVRC2012_val_00013754.JPEG 5
ILSVRC2012_val_00013761.JPEG 5
ILSVRC2012_val_00013768.JPEG 4
ILSVRC2012_val_00013785.JPEG 1
ILSVRC2012_val_00013788.JPEG 1
ILSVRC2012_val_00013790.JPEG 6
ILSVRC2012_val_00013794.JPEG 4
ILSVRC2012_val_00013822.JPEG 4
ILSVRC2012_val_00013832.JPEG 8
ILSVRC2012_val_00013840.JPEG 4
ILSVRC2012_val_00013863.JPEG 4
ILSVRC2012_val_00013891.JPEG 7
ILSVRC2012_val_00013918.JPEG 1
ILSVRC2012_val_00013924.JPEG 8
ILSVRC2012_val_00013943.JPEG 5
ILSVRC2012_val_00013951.JPEG 8
ILSVRC2012_val_00013957.JPEG 6
ILSVRC2012_val_00013966.JPEG 5
ILSVRC2012_val_00013974.JPEG 2
ILSVRC2012_val_00013994.JPEG 8
ILSVRC2012_val_00013999.JPEG 7
ILSVRC2012_val_00014008.JPEG 8
ILSVRC2012_val_00014023.JPEG 4
ILSVRC2012_val_00014031.JPEG 8
ILSVRC2012_val_00014055.JPEG 5
ILSVRC2012_val_00014060.JPEG 8
ILSVRC2012_val_00014065.JPEG 5
ILSVRC2012_val_00014067.JPEG 8
ILSVRC2012_val_00014068.JPEG 4
ILSVRC2012_val_00014097.JPEG 4
ILSVRC2012_val_00014106.JPEG 3
ILSVRC2012_val_00014109.JPEG 0
ILSVRC2012_val_00014132.JPEG 7
ILSVRC2012_val_00014134.JPEG 8
ILSVRC2012_val_00014147.JPEG 0
ILSVRC2012_val_00014163.JPEG 5
ILSVRC2012_val_00014165.JPEG 4
ILSVRC2012_val_00014189.JPEG 0
ILSVRC2012_val_00014195.JPEG 6
ILSVRC2012_val_00014206.JPEG 5
ILSVRC2012_val_00014211.JPEG 5
ILSVRC2012_val_00014216.JPEG 1
ILSVRC2012_val_00014218.JPEG 8
ILSVRC2012_val_00014227.JPEG 2
ILSVRC2012_val_00014246.JPEG 0
ILSVRC2012_val_00014256.JPEG 4
ILSVRC2012_val_00014258.JPEG 6
ILSVRC2012_val_00014271.JPEG 8
ILSVRC2012_val_00014275.JPEG 5
ILSVRC2012_val_00014278.JPEG 8
ILSVRC2012_val_00014296.JPEG 5
ILSVRC2012_val_00014306.JPEG 5
ILSVRC2012_val_00014316.JPEG 3
ILSVRC2012_val_00014339.JPEG 5
ILSVRC2012_val_00014346.JPEG 4
ILSVRC2012_val_00014352.JPEG 3
ILSVRC2012_val_00014356.JPEG 8
ILSVRC2012_val_00014365.JPEG 8
ILSVRC2012_val_00014390.JPEG 8
ILSVRC2012_val_00014402.JPEG 5
ILSVRC2012_val_00014408.JPEG 8
ILSVRC2012_val_00014416.JPEG 4
ILSVRC2012_val_00014418.JPEG 0
ILSVRC2012_val_00014432.JPEG 1
ILSVRC2012_val_00014443.JPEG 6
ILSVRC2012_val_00014478.JPEG 4
ILSVRC2012_val_00014483.JPEG 8
ILSVRC2012_val_00014497.JPEG 5
ILSVRC2012_val_00014505.JPEG 5
ILSVRC2012_val_00014515.JPEG 6
ILSVRC2012_val_00014572.JPEG 8
ILSVRC2012_val_00014578.JPEG 5
ILSVRC2012_val_00014585.JPEG 3
ILSVRC2012_val_00014639.JPEG 8
ILSVRC2012_val_00014683.JPEG 8
ILSVRC2012_val_00014694.JPEG 5
ILSVRC2012_val_00014701.JPEG 0
ILSVRC2012_val_00014707.JPEG 4
ILSVRC2012_val_00014710.JPEG 0
ILSVRC2012_val_00014711.JPEG 0
ILSVRC2012_val_00014715.JPEG 7
ILSVRC2012_val_00014735.JPEG 2
ILSVRC2012_val_00014749.JPEG 0
ILSVRC2012_val_00014752.JPEG 3
ILSVRC2012_val_00014763.JPEG 6
ILSVRC2012_val_00014773.JPEG 1
ILSVRC2012_val_00014777.JPEG 6
ILSVRC2012_val_00014782.JPEG 5
ILSVRC2012_val_00014808.JPEG 4
ILSVRC2012_val_00014813.JPEG 1
ILSVRC2012_val_00014815.JPEG 1
ILSVRC2012_val_00014817.JPEG 4
ILSVRC2012_val_00014824.JPEG 8
ILSVRC2012_val_00014845.JPEG 0
ILSVRC2012_val_00014860.JPEG 1
ILSVRC2012_val_00014877.JPEG 0
ILSVRC2012_val_00014888.JPEG 0
ILSVRC2012_val_00014890.JPEG 4
ILSVRC2012_val_00014895.JPEG 7
ILSVRC2012_val_00014903.JPEG 4
ILSVRC2012_val_00014918.JPEG 5
ILSVRC2012_val_00014921.JPEG 7
ILSVRC2012_val_00014928.JPEG 0
ILSVRC2012_val_00014940.JPEG 5
ILSVRC2012_val_00014942.JPEG 4
ILSVRC2012_val_00014947.JPEG 5
ILSVRC2012_val_00014964.JPEG 8
ILSVRC2012_val_00014966.JPEG 8
ILSVRC2012_val_00015010.JPEG 5
ILSVRC2012_val_00015021.JPEG 8
ILSVRC2012_val_00015022.JPEG 8
ILSVRC2012_val_00015023.JPEG 5
ILSVRC2012_val_00015024.JPEG 6
ILSVRC2012_val_00015033.JPEG 5
ILSVRC2012_val_00015041.JPEG 5
ILSVRC2012_val_00015056.JPEG 8
ILSVRC2012_val_00015059.JPEG 3
ILSVRC2012_val_00015063.JPEG 0
ILSVRC2012_val_00015064.JPEG 5
ILSVRC2012_val_00015066.JPEG 5
ILSVRC2012_val_00015068.JPEG 8
ILSVRC2012_val_00015084.JPEG 5
ILSVRC2012_val_00015093.JPEG 6
ILSVRC2012_val_00015096.JPEG 0
ILSVRC2012_val_00015112.JPEG 8
ILSVRC2012_val_00015114.JPEG 5
ILSVRC2012_val_00015116.JPEG 0
ILSVRC2012_val_00015120.JPEG 7
ILSVRC2012_val_00015135.JPEG 0
ILSVRC2012_val_00015140.JPEG 6
ILSVRC2012_val_00015148.JPEG 5
ILSVRC2012_val_00015172.JPEG 8
ILSVRC2012_val_00015173.JPEG 0
ILSVRC2012_val_00015186.JPEG 8
ILSVRC2012_val_00015193.JPEG 3
ILSVRC2012_val_00015213.JPEG 0
ILSVRC2012_val_00015222.JPEG 6
ILSVRC2012_val_00015245.JPEG 2
ILSVRC2012_val_00015257.JPEG 5
ILSVRC2012_val_00015265.JPEG 1
ILSVRC2012_val_00015271.JPEG 8
ILSVRC2012_val_00015281.JPEG 6
ILSVRC2012_val_00015291.JPEG 4
ILSVRC2012_val_00015293.JPEG 8
ILSVRC2012_val_00015298.JPEG 4
ILSVRC2012_val_00015319.JPEG 7
ILSVRC2012_val_00015322.JPEG 4
ILSVRC2012_val_00015324.JPEG 4
ILSVRC2012_val_00015339.JPEG 5
ILSVRC2012_val_00015372.JPEG 1
ILSVRC2012_val_00015378.JPEG 1
ILSVRC2012_val_00015380.JPEG 5
ILSVRC2012_val_00015401.JPEG 1
ILSVRC2012_val_00015402.JPEG 7
ILSVRC2012_val_00015414.JPEG 6
ILSVRC2012_val_00015432.JPEG 5
ILSVRC2012_val_00015468.JPEG 3
ILSVRC2012_val_00015470.JPEG 8
ILSVRC2012_val_00015475.JPEG 3
ILSVRC2012_val_00015493.JPEG 8
ILSVRC2012_val_00015513.JPEG 4
ILSVRC2012_val_00015518.JPEG 0
ILSVRC2012_val_00015526.JPEG 7
ILSVRC2012_val_00015529.JPEG 5
ILSVRC2012_val_00015535.JPEG 8
ILSVRC2012_val_00015546.JPEG 6
ILSVRC2012_val_00015565.JPEG 4
ILSVRC2012_val_00015568.JPEG 3
ILSVRC2012_val_00015600.JPEG 8
ILSVRC2012_val_00015603.JPEG 8
ILSVRC2012_val_00015606.JPEG 8
ILSVRC2012_val_00015624.JPEG 4
ILSVRC2012_val_00015665.JPEG 4
ILSVRC2012_val_00015673.JPEG 4
ILSVRC2012_val_00015675.JPEG 4
ILSVRC2012_val_00015690.JPEG 4
ILSVRC2012_val_00015692.JPEG 6
ILSVRC2012_val_00015704.JPEG 5
ILSVRC2012_val_00015713.JPEG 4
ILSVRC2012_val_00015727.JPEG 8
ILSVRC2012_val_00015729.JPEG 8
ILSVRC2012_val_00015739.JPEG 4
ILSVRC2012_val_00015741.JPEG 1
ILSVRC2012_val_00015745.JPEG 8
ILSVRC2012_val_00015752.JPEG 6
ILSVRC2012_val_00015755.JPEG 8
ILSVRC2012_val_00015773.JPEG 7
ILSVRC2012_val_00015776.JPEG 8
ILSVRC2012_val_00015789.JPEG 7
ILSVRC2012_val_00015799.JPEG 4
ILSVRC2012_val_00015802.JPEG 8
ILSVRC2012_val_00015810.JPEG 0
ILSVRC2012_val_00015815.JPEG 4
ILSVRC2012_val_00015818.JPEG 8
ILSVRC2012_val_00015854.JPEG 4
ILSVRC2012_val_00015860.JPEG 8
ILSVRC2012_val_00015876.JPEG 5
ILSVRC2012_val_00015898.JPEG 1
ILSVRC2012_val_00015899.JPEG 4
ILSVRC2012_val_00015902.JPEG 3
ILSVRC2012_val_00015909.JPEG 5
ILSVRC2012_val_00015923.JPEG 0
ILSVRC2012_val_00015924.JPEG 3
ILSVRC2012_val_00015926.JPEG 5
ILSVRC2012_val_00015928.JPEG 5
ILSVRC2012_val_00015950.JPEG 0
ILSVRC2012_val_00015975.JPEG 8
ILSVRC2012_val_00015983.JPEG 8
ILSVRC2012_val_00015987.JPEG 4
ILSVRC2012_val_00016000.JPEG 1
ILSVRC2012_val_00016076.JPEG 0
ILSVRC2012_val_00016081.JPEG 4
ILSVRC2012_val_00016117.JPEG 5
ILSVRC2012_val_00016143.JPEG 6
ILSVRC2012_val_00016150.JPEG 8
ILSVRC2012_val_00016160.JPEG 8
ILSVRC2012_val_00016171.JPEG 8
ILSVRC2012_val_00016173.JPEG 5
ILSVRC2012_val_00016177.JPEG 2
ILSVRC2012_val_00016181.JPEG 8
ILSVRC2012_val_00016190.JPEG 5
ILSVRC2012_val_00016194.JPEG 1
ILSVRC2012_val_00016195.JPEG 4
ILSVRC2012_val_00016196.JPEG 5
ILSVRC2012_val_00016239.JPEG 6
ILSVRC2012_val_00016240.JPEG 1
ILSVRC2012_val_00016257.JPEG 5
ILSVRC2012_val_00016270.JPEG 6
ILSVRC2012_val_00016276.JPEG 8
ILSVRC2012_val_00016302.JPEG 0
ILSVRC2012_val_00016306.JPEG 6
ILSVRC2012_val_00016325.JPEG 4
ILSVRC2012_val_00016333.JPEG 7
ILSVRC2012_val_00016350.JPEG 4
ILSVRC2012_val_00016354.JPEG 1
ILSVRC2012_val_00016355.JPEG 8
ILSVRC2012_val_00016370.JPEG 0
ILSVRC2012_val_00016389.JPEG 1
ILSVRC2012_val_00016399.JPEG 1
ILSVRC2012_val_00016411.JPEG 0
ILSVRC2012_val_00016421.JPEG 4
ILSVRC2012_val_00016432.JPEG 5
ILSVRC2012_val_00016467.JPEG 8
ILSVRC2012_val_00016480.JPEG 8
ILSVRC2012_val_00016483.JPEG 1
ILSVRC2012_val_00016487.JPEG 4
ILSVRC2012_val_00016489.JPEG 0
ILSVRC2012_val_00016490.JPEG 4
ILSVRC2012_val_00016519.JPEG 2
ILSVRC2012_val_00016550.JPEG 3
ILSVRC2012_val_00016554.JPEG 7
ILSVRC2012_val_00016559.JPEG 5
ILSVRC2012_val_00016567.JPEG 0
ILSVRC2012_val_00016575.JPEG 8
ILSVRC2012_val_00016580.JPEG 4
ILSVRC2012_val_00016589.JPEG 0
ILSVRC2012_val_00016594.JPEG 8
ILSVRC2012_val_00016598.JPEG 1
ILSVRC2012_val_00016599.JPEG 5
ILSVRC2012_val_00016611.JPEG 5
ILSVRC2012_val_00016623.JPEG 4
ILSVRC2012_val_00016631.JPEG 4
ILSVRC2012_val_00016633.JPEG 3
ILSVRC2012_val_00016634.JPEG 8
ILSVRC2012_val_00016641.JPEG 8
ILSVRC2012_val_00016651.JPEG 5
ILSVRC2012_val_00016664.JPEG 8
ILSVRC2012_val_00016668.JPEG 0
ILSVRC2012_val_00016678.JPEG 0
ILSVRC2012_val_00016683.JPEG 8
ILSVRC2012_val_00016689.JPEG 0
ILSVRC2012_val_00016698.JPEG 6
ILSVRC2012_val_00016700.JPEG 3
ILSVRC2012_val_00016706.JPEG 5
ILSVRC2012_val_00016711.JPEG 0
ILSVRC2012_val_00016731.JPEG 6
ILSVRC2012_val_00016740.JPEG 8
ILSVRC2012_val_00016746.JPEG 4
ILSVRC2012_val_00016770.JPEG 8
ILSVRC2012_val_00016776.JPEG 8
ILSVRC2012_val_00016777.JPEG 8
ILSVRC2012_val_00016779.JPEG 3
ILSVRC2012_val_00016782.JPEG 2
ILSVRC2012_val_00016791.JPEG 5
ILSVRC2012_val_00016823.JPEG 8
ILSVRC2012_val_00016825.JPEG 6
ILSVRC2012_val_00016829.JPEG 5
ILSVRC2012_val_00016852.JPEG 4
ILSVRC2012_val_00016860.JPEG 0
ILSVRC2012_val_00016881.JPEG 5
ILSVRC2012_val_00016887.JPEG 4
ILSVRC2012_val_00016888.JPEG 8
ILSVRC2012_val_00016918.JPEG 1
ILSVRC2012_val_00016922.JPEG 0
ILSVRC2012_val_00016926.JPEG 8
ILSVRC2012_val_00016934.JPEG 2
ILSVRC2012_val_00016946.JPEG 5
ILSVRC2012_val_00016989.JPEG 0
ILSVRC2012_val_00017008.JPEG 6
ILSVRC2012_val_00017029.JPEG 4
ILSVRC2012_val_00017044.JPEG 5
ILSVRC2012_val_00017068.JPEG 4
ILSVRC2012_val_00017073.JPEG 8
ILSVRC2012_val_00017079.JPEG 6
ILSVRC2012_val_00017115.JPEG 8
ILSVRC2012_val_00017130.JPEG 8
ILSVRC2012_val_00017137.JPEG 7
ILSVRC2012_val_00017138.JPEG 2
ILSVRC2012_val_00017139.JPEG 8
ILSVRC2012_val_00017143.JPEG 4
ILSVRC2012_val_00017157.JPEG 7
ILSVRC2012_val_00017186.JPEG 1
ILSVRC2012_val_00017200.JPEG 5
ILSVRC2012_val_00017207.JPEG 4
ILSVRC2012_val_00017221.JPEG 8
ILSVRC2012_val_00017222.JPEG 3
ILSVRC2012_val_00017223.JPEG 5
ILSVRC2012_val_00017239.JPEG 6
ILSVRC2012_val_00017242.JPEG 4
ILSVRC2012_val_00017243.JPEG 3
ILSVRC2012_val_00017245.JPEG 8
ILSVRC2012_val_00017251.JPEG 4
ILSVRC2012_val_00017252.JPEG 4
ILSVRC2012_val_00017253.JPEG 4
ILSVRC2012_val_00017264.JPEG 8
ILSVRC2012_val_00017266.JPEG 5
ILSVRC2012_val_00017280.JPEG 4
ILSVRC2012_val_00017290.JPEG 5
ILSVRC2012_val_00017299.JPEG 8
ILSVRC2012_val_00017303.JPEG 5
ILSVRC2012_val_00017325.JPEG 1
ILSVRC2012_val_00017353.JPEG 5
ILSVRC2012_val_00017379.JPEG 7
ILSVRC2012_val_00017398.JPEG 8
ILSVRC2012_val_00017399.JPEG 8
ILSVRC2012_val_00017406.JPEG 8
ILSVRC2012_val_00017418.JPEG 8
ILSVRC2012_val_00017423.JPEG 8
ILSVRC2012_val_00017430.JPEG 4
ILSVRC2012_val_00017441.JPEG 4
ILSVRC2012_val_00017454.JPEG 4
ILSVRC2012_val_00017458.JPEG 5
ILSVRC2012_val_00017479.JPEG 5
ILSVRC2012_val_00017486.JPEG 1
ILSVRC2012_val_00017493.JPEG 5
ILSVRC2012_val_00017505.JPEG 2
ILSVRC2012_val_00017507.JPEG 5
ILSVRC2012_val_00017508.JPEG 4
ILSVRC2012_val_00017529.JPEG 0
ILSVRC2012_val_00017542.JPEG 4
ILSVRC2012_val_00017548.JPEG 5
ILSVRC2012_val_00017552.JPEG 8
ILSVRC2012_val_00017556.JPEG 8
ILSVRC2012_val_00017568.JPEG 0
ILSVRC2012_val_00017574.JPEG 5
ILSVRC2012_val_00017593.JPEG 8
ILSVRC2012_val_00017616.JPEG 5
ILSVRC2012_val_00017630.JPEG 8
ILSVRC2012_val_00017635.JPEG 8
ILSVRC2012_val_00017638.JPEG 8
ILSVRC2012_val_00017669.JPEG 2
ILSVRC2012_val_00017677.JPEG 8
ILSVRC2012_val_00017678.JPEG 6
ILSVRC2012_val_00017683.JPEG 6
ILSVRC2012_val_00017692.JPEG 1
ILSVRC2012_val_00017715.JPEG 0
ILSVRC2012_val_00017727.JPEG 8
ILSVRC2012_val_00017751.JPEG 7
ILSVRC2012_val_00017759.JPEG 4
ILSVRC2012_val_00017767.JPEG 4
ILSVRC2012_val_00017776.JPEG 5
ILSVRC2012_val_00017803.JPEG 5
ILSVRC2012_val_00017814.JPEG 1
ILSVRC2012_val_00017845.JPEG 8
ILSVRC2012_val_00017848.JPEG 8
ILSVRC2012_val_00017850.JPEG 0
ILSVRC2012_val_00017862.JPEG 6
ILSVRC2012_val_00017875.JPEG 8
ILSVRC2012_val_00017882.JPEG 2
ILSVRC2012_val_00017887.JPEG 4
ILSVRC2012_val_00017893.JPEG 8
ILSVRC2012_val_00017905.JPEG 0
ILSVRC2012_val_00017911.JPEG 7
ILSVRC2012_val_00017924.JPEG 6
ILSVRC2012_val_00017931.JPEG 4
ILSVRC2012_val_00017939.JPEG 4
ILSVRC2012_val_00017942.JPEG 8
ILSVRC2012_val_00017947.JPEG 6
ILSVRC2012_val_00017989.JPEG 2
ILSVRC2012_val_00018003.JPEG 8
ILSVRC2012_val_00018016.JPEG 5
ILSVRC2012_val_00018017.JPEG 5
ILSVRC2012_val_00018022.JPEG 8
ILSVRC2012_val_00018036.JPEG 4
ILSVRC2012_val_00018048.JPEG 8
ILSVRC2012_val_00018052.JPEG 7
ILSVRC2012_val_00018055.JPEG 0
ILSVRC2012_val_00018059.JPEG 5
ILSVRC2012_val_00018102.JPEG 8
ILSVRC2012_val_00018106.JPEG 8
ILSVRC2012_val_00018128.JPEG 4
ILSVRC2012_val_00018131.JPEG 5
ILSVRC2012_val_00018134.JPEG 4
ILSVRC2012_val_00018141.JPEG 0
ILSVRC2012_val_00018142.JPEG 8
ILSVRC2012_val_00018149.JPEG 8
ILSVRC2012_val_00018156.JPEG 4
ILSVRC2012_val_00018160.JPEG 2
ILSVRC2012_val_00018161.JPEG 8
ILSVRC2012_val_00018175.JPEG 5
ILSVRC2012_val_00018195.JPEG 4
ILSVRC2012_val_00018211.JPEG 7
ILSVRC2012_val_00018224.JPEG 0
ILSVRC2012_val_00018242.JPEG 5
ILSVRC2012_val_00018248.JPEG 4
ILSVRC2012_val_00018253.JPEG 5
ILSVRC2012_val_00018257.JPEG 8
ILSVRC2012_val_00018265.JPEG 7
ILSVRC2012_val_00018271.JPEG 8
ILSVRC2012_val_00018273.JPEG 4
ILSVRC2012_val_00018288.JPEG 8
ILSVRC2012_val_00018310.JPEG 4
ILSVRC2012_val_00018318.JPEG 4
ILSVRC2012_val_00018328.JPEG 5
ILSVRC2012_val_00018332.JPEG 8
ILSVRC2012_val_00018333.JPEG 5
ILSVRC2012_val_00018339.JPEG 2
ILSVRC2012_val_00018362.JPEG 3
ILSVRC2012_val_00018365.JPEG 8
ILSVRC2012_val_00018375.JPEG 8
ILSVRC2012_val_00018393.JPEG 4
ILSVRC2012_val_00018412.JPEG 4
ILSVRC2012_val_00018414.JPEG 3
ILSVRC2012_val_00018415.JPEG 8
ILSVRC2012_val_00018428.JPEG 4
ILSVRC2012_val_00018463.JPEG 4
ILSVRC2012_val_00018465.JPEG 6
ILSVRC2012_val_00018481.JPEG 2
ILSVRC2012_val_00018502.JPEG 5
ILSVRC2012_val_00018512.JPEG 2
ILSVRC2012_val_00018535.JPEG 8
ILSVRC2012_val_00018551.JPEG 0
ILSVRC2012_val_00018575.JPEG 0
ILSVRC2012_val_00018581.JPEG 6
ILSVRC2012_val_00018584.JPEG 0
ILSVRC2012_val_00018602.JPEG 4
ILSVRC2012_val_00018606.JPEG 6
ILSVRC2012_val_00018619.JPEG 5
ILSVRC2012_val_00018626.JPEG 4
ILSVRC2012_val_00018634.JPEG 8
ILSVRC2012_val_00018639.JPEG 5
ILSVRC2012_val_00018644.JPEG 4
ILSVRC2012_val_00018648.JPEG 4
ILSVRC2012_val_00018652.JPEG 0
ILSVRC2012_val_00018673.JPEG 7
ILSVRC2012_val_00018688.JPEG 0
ILSVRC2012_val_00018739.JPEG 5
ILSVRC2012_val_00018742.JPEG 4
ILSVRC2012_val_00018747.JPEG 5
ILSVRC2012_val_00018749.JPEG 5
ILSVRC2012_val_00018750.JPEG 7
ILSVRC2012_val_00018754.JPEG 2
ILSVRC2012_val_00018780.JPEG 4
ILSVRC2012_val_00018784.JPEG 6
ILSVRC2012_val_00018789.JPEG 6
ILSVRC2012_val_00018793.JPEG 7
ILSVRC2012_val_00018813.JPEG 6
ILSVRC2012_val_00018824.JPEG 6
ILSVRC2012_val_00018826.JPEG 0
ILSVRC2012_val_00018827.JPEG 0
ILSVRC2012_val_00018830.JPEG 6
ILSVRC2012_val_00018836.JPEG 6
ILSVRC2012_val_00018839.JPEG 8
ILSVRC2012_val_00018852.JPEG 5
ILSVRC2012_val_00018858.JPEG 8
ILSVRC2012_val_00018877.JPEG 8
ILSVRC2012_val_00018879.JPEG 2
ILSVRC2012_val_00018904.JPEG 5
ILSVRC2012_val_00018961.JPEG 7
ILSVRC2012_val_00018962.JPEG 5
ILSVRC2012_val_00018993.JPEG 4
ILSVRC2012_val_00019022.JPEG 4
ILSVRC2012_val_00019024.JPEG 4
ILSVRC2012_val_00019029.JPEG 8
ILSVRC2012_val_00019036.JPEG 4
ILSVRC2012_val_00019047.JPEG 5
ILSVRC2012_val_00019063.JPEG 6
ILSVRC2012_val_00019068.JPEG 3
ILSVRC2012_val_00019070.JPEG 6
ILSVRC2012_val_00019073.JPEG 4
ILSVRC2012_val_00019077.JPEG 5
ILSVRC2012_val_00019078.JPEG 5
ILSVRC2012_val_00019092.JPEG 8
ILSVRC2012_val_00019099.JPEG 5
ILSVRC2012_val_00019100.JPEG 3
ILSVRC2012_val_00019103.JPEG 5
ILSVRC2012_val_00019113.JPEG 5
ILSVRC2012_val_00019119.JPEG 1
ILSVRC2012_val_00019123.JPEG 4
ILSVRC2012_val_00019129.JPEG 5
ILSVRC2012_val_00019132.JPEG 5
ILSVRC2012_val_00019151.JPEG 8
ILSVRC2012_val_00019171.JPEG 8
ILSVRC2012_val_00019173.JPEG 0
ILSVRC2012_val_00019180.JPEG 6
ILSVRC2012_val_00019183.JPEG 8
ILSVRC2012_val_00019202.JPEG 8
ILSVRC2012_val_00019218.JPEG 6
ILSVRC2012_val_00019235.JPEG 5
ILSVRC2012_val_00019237.JPEG 8
ILSVRC2012_val_00019245.JPEG 8
ILSVRC2012_val_00019251.JPEG 4
ILSVRC2012_val_00019260.JPEG 5
ILSVRC2012_val_00019262.JPEG 1
ILSVRC2012_val_00019279.JPEG 5
ILSVRC2012_val_00019282.JPEG 3
ILSVRC2012_val_00019293.JPEG 6
ILSVRC2012_val_00019299.JPEG 8
ILSVRC2012_val_00019303.JPEG 1
ILSVRC2012_val_00019306.JPEG 6
ILSVRC2012_val_00019313.JPEG 4
ILSVRC2012_val_00019314.JPEG 8
ILSVRC2012_val_00019328.JPEG 4
ILSVRC2012_val_00019335.JPEG 5
ILSVRC2012_val_00019357.JPEG 8
ILSVRC2012_val_00019368.JPEG 7
ILSVRC2012_val_00019369.JPEG 6
ILSVRC2012_val_00019399.JPEG 3
ILSVRC2012_val_00019403.JPEG 6
ILSVRC2012_val_00019415.JPEG 0
ILSVRC2012_val_00019429.JPEG 4
ILSVRC2012_val_00019432.JPEG 5
ILSVRC2012_val_00019448.JPEG 5
ILSVRC2012_val_00019451.JPEG 5
ILSVRC2012_val_00019460.JPEG 8
ILSVRC2012_val_00019467.JPEG 8
ILSVRC2012_val_00019469.JPEG 5
ILSVRC2012_val_00019489.JPEG 6
ILSVRC2012_val_00019510.JPEG 7
ILSVRC2012_val_00019511.JPEG 4
ILSVRC2012_val_00019516.JPEG 6
ILSVRC2012_val_00019524.JPEG 8
ILSVRC2012_val_00019527.JPEG 8
ILSVRC2012_val_00019539.JPEG 6
ILSVRC2012_val_00019544.JPEG 0
ILSVRC2012_val_00019547.JPEG 3
ILSVRC2012_val_00019560.JPEG 3
ILSVRC2012_val_00019569.JPEG 8
ILSVRC2012_val_00019578.JPEG 2
ILSVRC2012_val_00019586.JPEG 6
ILSVRC2012_val_00019592.JPEG 8
ILSVRC2012_val_00019643.JPEG 8
ILSVRC2012_val_00019665.JPEG 0
ILSVRC2012_val_00019672.JPEG 6
ILSVRC2012_val_00019678.JPEG 0
ILSVRC2012_val_00019691.JPEG 6
ILSVRC2012_val_00019716.JPEG 4
ILSVRC2012_val_00019737.JPEG 8
ILSVRC2012_val_00019750.JPEG 4
ILSVRC2012_val_00019757.JPEG 0
ILSVRC2012_val_00019787.JPEG 4
ILSVRC2012_val_00019791.JPEG 6
ILSVRC2012_val_00019807.JPEG 5
ILSVRC2012_val_00019811.JPEG 8
ILSVRC2012_val_00019820.JPEG 8
ILSVRC2012_val_00019822.JPEG 0
ILSVRC2012_val_00019834.JPEG 2
ILSVRC2012_val_00019838.JPEG 8
ILSVRC2012_val_00019859.JPEG 7
ILSVRC2012_val_00019876.JPEG 0
ILSVRC2012_val_00019884.JPEG 4
ILSVRC2012_val_00019885.JPEG 4
ILSVRC2012_val_00019919.JPEG 0
ILSVRC2012_val_00019961.JPEG 5
ILSVRC2012_val_00020000.JPEG 5
ILSVRC2012_val_00020013.JPEG 8
ILSVRC2012_val_00020014.JPEG 4
ILSVRC2012_val_00020026.JPEG 8
ILSVRC2012_val_00020031.JPEG 0
ILSVRC2012_val_00020053.JPEG 8
ILSVRC2012_val_00020056.JPEG 8
ILSVRC2012_val_00020059.JPEG 2
ILSVRC2012_val_00020089.JPEG 8
ILSVRC2012_val_00020109.JPEG 4
ILSVRC2012_val_00020136.JPEG 1
ILSVRC2012_val_00020140.JPEG 1
ILSVRC2012_val_00020141.JPEG 3
ILSVRC2012_val_00020159.JPEG 8
ILSVRC2012_val_00020164.JPEG 8
ILSVRC2012_val_00020171.JPEG 5
ILSVRC2012_val_00020179.JPEG 4
ILSVRC2012_val_00020180.JPEG 2
ILSVRC2012_val_00020183.JPEG 8
ILSVRC2012_val_00020215.JPEG 5
ILSVRC2012_val_00020217.JPEG 5
ILSVRC2012_val_00020220.JPEG 6
ILSVRC2012_val_00020230.JPEG 1
ILSVRC2012_val_00020239.JPEG 4
ILSVRC2012_val_00020260.JPEG 0
ILSVRC2012_val_00020270.JPEG 0
ILSVRC2012_val_00020279.JPEG 0
ILSVRC2012_val_00020284.JPEG 4
ILSVRC2012_val_00020286.JPEG 8
ILSVRC2012_val_00020301.JPEG 5
ILSVRC2012_val_00020308.JPEG 8
ILSVRC2012_val_00020321.JPEG 2
ILSVRC2012_val_00020331.JPEG 8
ILSVRC2012_val_00020341.JPEG 5
ILSVRC2012_val_00020354.JPEG 8
ILSVRC2012_val_00020360.JPEG 8
ILSVRC2012_val_00020397.JPEG 8
ILSVRC2012_val_00020406.JPEG 5
ILSVRC2012_val_00020428.JPEG 0
ILSVRC2012_val_00020443.JPEG 4
ILSVRC2012_val_00020454.JPEG 8
ILSVRC2012_val_00020464.JPEG 8
ILSVRC2012_val_00020488.JPEG 0
ILSVRC2012_val_00020492.JPEG 6
ILSVRC2012_val_00020511.JPEG 7
ILSVRC2012_val_00020514.JPEG 4
ILSVRC2012_val_00020525.JPEG 5
ILSVRC2012_val_00020536.JPEG 7
ILSVRC2012_val_00020551.JPEG 8
ILSVRC2012_val_00020552.JPEG 4
ILSVRC2012_val_00020558.JPEG 6
ILSVRC2012_val_00020563.JPEG 6
ILSVRC2012_val_00020564.JPEG 8
ILSVRC2012_val_00020581.JPEG 8
ILSVRC2012_val_00020587.JPEG 4
ILSVRC2012_val_00020594.JPEG 1
ILSVRC2012_val_00020622.JPEG 6
ILSVRC2012_val_00020633.JPEG 0
ILSVRC2012_val_00020635.JPEG 8
ILSVRC2012_val_00020642.JPEG 5
ILSVRC2012_val_00020649.JPEG 8
ILSVRC2012_val_00020652.JPEG 8
ILSVRC2012_val_00020657.JPEG 8
ILSVRC2012_val_00020675.JPEG 7
ILSVRC2012_val_00020683.JPEG 4
ILSVRC2012_val_00020688.JPEG 1
ILSVRC2012_val_00020690.JPEG 4
ILSVRC2012_val_00020693.JPEG 6
ILSVRC2012_val_00020727.JPEG 5
ILSVRC2012_val_00020737.JPEG 0
ILSVRC2012_val_00020744.JPEG 4
ILSVRC2012_val_00020747.JPEG 4
ILSVRC2012_val_00020749.JPEG 4
ILSVRC2012_val_00020757.JPEG 6
ILSVRC2012_val_00020765.JPEG 1
ILSVRC2012_val_00020779.JPEG 7
ILSVRC2012_val_00020792.JPEG 8
ILSVRC2012_val_00020800.JPEG 7
ILSVRC2012_val_00020803.JPEG 6
ILSVRC2012_val_00020811.JPEG 5
ILSVRC2012_val_00020816.JPEG 7
ILSVRC2012_val_00020824.JPEG 8
ILSVRC2012_val_00020869.JPEG 5
ILSVRC2012_val_00020907.JPEG 3
ILSVRC2012_val_00020909.JPEG 4
ILSVRC2012_val_00020915.JPEG 4
ILSVRC2012_val_00020916.JPEG 2
ILSVRC2012_val_00020920.JPEG 4
ILSVRC2012_val_00020936.JPEG 5
ILSVRC2012_val_00020943.JPEG 2
ILSVRC2012_val_00020970.JPEG 7
ILSVRC2012_val_00020976.JPEG 4
ILSVRC2012_val_00020978.JPEG 5
ILSVRC2012_val_00020985.JPEG 8
ILSVRC2012_val_00020994.JPEG 3
ILSVRC2012_val_00020997.JPEG 5
ILSVRC2012_val_00021058.JPEG 0
ILSVRC2012_val_00021072.JPEG 8
ILSVRC2012_val_00021074.JPEG 5
ILSVRC2012_val_00021079.JPEG 0
ILSVRC2012_val_00021080.JPEG 7
ILSVRC2012_val_00021086.JPEG 8
ILSVRC2012_val_00021090.JPEG 4
ILSVRC2012_val_00021137.JPEG 5
ILSVRC2012_val_00021139.JPEG 4
ILSVRC2012_val_00021140.JPEG 5
ILSVRC2012_val_00021147.JPEG 5
ILSVRC2012_val_00021152.JPEG 8
ILSVRC2012_val_00021157.JPEG 8
ILSVRC2012_val_00021195.JPEG 1
ILSVRC2012_val_00021206.JPEG 0
ILSVRC2012_val_00021211.JPEG 2
ILSVRC2012_val_00021221.JPEG 8
ILSVRC2012_val_00021238.JPEG 8
ILSVRC2012_val_00021241.JPEG 7
ILSVRC2012_val_00021248.JPEG 5
ILSVRC2012_val_00021255.JPEG 8
ILSVRC2012_val_00021269.JPEG 7
ILSVRC2012_val_00021278.JPEG 4
ILSVRC2012_val_00021281.JPEG 4
ILSVRC2012_val_00021291.JPEG 3
ILSVRC2012_val_00021303.JPEG 6
ILSVRC2012_val_00021305.JPEG 4
ILSVRC2012_val_00021314.JPEG 8
ILSVRC2012_val_00021331.JPEG 5
ILSVRC2012_val_00021333.JPEG 5
ILSVRC2012_val_00021334.JPEG 7
ILSVRC2012_val_00021341.JPEG 4
ILSVRC2012_val_00021343.JPEG 6
ILSVRC2012_val_00021345.JPEG 4
ILSVRC2012_val_00021351.JPEG 4
ILSVRC2012_val_00021352.JPEG 5
ILSVRC2012_val_00021360.JPEG 0
ILSVRC2012_val_00021361.JPEG 5
ILSVRC2012_val_00021366.JPEG 8
ILSVRC2012_val_00021372.JPEG 4
ILSVRC2012_val_00021378.JPEG 7
ILSVRC2012_val_00021385.JPEG 7
ILSVRC2012_val_00021406.JPEG 5
ILSVRC2012_val_00021417.JPEG 4
ILSVRC2012_val_00021423.JPEG 8
ILSVRC2012_val_00021448.JPEG 6
ILSVRC2012_val_00021455.JPEG 4
ILSVRC2012_val_00021469.JPEG 5
ILSVRC2012_val_00021474.JPEG 4
ILSVRC2012_val_00021475.JPEG 0
ILSVRC2012_val_00021476.JPEG 6
ILSVRC2012_val_00021477.JPEG 5
ILSVRC2012_val_00021478.JPEG 8
ILSVRC2012_val_00021490.JPEG 5
ILSVRC2012_val_00021505.JPEG 6
ILSVRC2012_val_00021513.JPEG 8
ILSVRC2012_val_00021514.JPEG 8
ILSVRC2012_val_00021520.JPEG 5
ILSVRC2012_val_00021521.JPEG 8
ILSVRC2012_val_00021540.JPEG 0
ILSVRC2012_val_00021557.JPEG 5
ILSVRC2012_val_00021564.JPEG 4
ILSVRC2012_val_00021572.JPEG 5
ILSVRC2012_val_00021579.JPEG 5
ILSVRC2012_val_00021594.JPEG 4
ILSVRC2012_val_00021597.JPEG 8
ILSVRC2012_val_00021602.JPEG 8
ILSVRC2012_val_00021607.JPEG 8
ILSVRC2012_val_00021611.JPEG 2
ILSVRC2012_val_00021625.JPEG 4
ILSVRC2012_val_00021626.JPEG 5
ILSVRC2012_val_00021653.JPEG 8
ILSVRC2012_val_00021663.JPEG 4
ILSVRC2012_val_00021675.JPEG 1
ILSVRC2012_val_00021678.JPEG 8
ILSVRC2012_val_00021679.JPEG 5
ILSVRC2012_val_00021688.JPEG 8
ILSVRC2012_val_00021699.JPEG 6
ILSVRC2012_val_00021703.JPEG 1
ILSVRC2012_val_00021708.JPEG 6
ILSVRC2012_val_00021714.JPEG 5
ILSVRC2012_val_00021735.JPEG 8
ILSVRC2012_val_00021739.JPEG 8
ILSVRC2012_val_00021741.JPEG 5
ILSVRC2012_val_00021744.JPEG 0
ILSVRC2012_val_00021753.JPEG 4
ILSVRC2012_val_00021755.JPEG 8
ILSVRC2012_val_00021776.JPEG 2
ILSVRC2012_val_00021794.JPEG 8
ILSVRC2012_val_00021798.JPEG 5
ILSVRC2012_val_00021808.JPEG 8
ILSVRC2012_val_00021828.JPEG 5
ILSVRC2012_val_00021832.JPEG 6
ILSVRC2012_val_00021847.JPEG 8
ILSVRC2012_val_00021858.JPEG 4
ILSVRC2012_val_00021864.JPEG 8
ILSVRC2012_val_00021876.JPEG 4
ILSVRC2012_val_00021880.JPEG 8
ILSVRC2012_val_00021885.JPEG 4
ILSVRC2012_val_00021890.JPEG 6
ILSVRC2012_val_00021895.JPEG 6
ILSVRC2012_val_00021904.JPEG 0
ILSVRC2012_val_00021918.JPEG 8
ILSVRC2012_val_00021935.JPEG 8
ILSVRC2012_val_00021953.JPEG 8
ILSVRC2012_val_00021954.JPEG 4
ILSVRC2012_val_00021982.JPEG 3
ILSVRC2012_val_00021983.JPEG 3
ILSVRC2012_val_00021994.JPEG 6
ILSVRC2012_val_00022001.JPEG 8
ILSVRC2012_val_00022029.JPEG 5
ILSVRC2012_val_00022040.JPEG 5
ILSVRC2012_val_00022052.JPEG 2
ILSVRC2012_val_00022065.JPEG 6
ILSVRC2012_val_00022070.JPEG 4
ILSVRC2012_val_00022080.JPEG 1
ILSVRC2012_val_00022082.JPEG 5
ILSVRC2012_val_00022085.JPEG 1
ILSVRC2012_val_00022092.JPEG 5
ILSVRC2012_val_00022095.JPEG 4
ILSVRC2012_val_00022110.JPEG 4
ILSVRC2012_val_00022115.JPEG 4
ILSVRC2012_val_00022133.JPEG 0
ILSVRC2012_val_00022148.JPEG 4
ILSVRC2012_val_00022155.JPEG 8
ILSVRC2012_val_00022160.JPEG 8
ILSVRC2012_val_00022174.JPEG 5
ILSVRC2012_val_00022189.JPEG 4
ILSVRC2012_val_00022194.JPEG 5
ILSVRC2012_val_00022198.JPEG 3
ILSVRC2012_val_00022211.JPEG 4
ILSVRC2012_val_00022215.JPEG 8
ILSVRC2012_val_00022223.JPEG 5
ILSVRC2012_val_00022227.JPEG 8
ILSVRC2012_val_00022245.JPEG 4
ILSVRC2012_val_00022264.JPEG 0
ILSVRC2012_val_00022273.JPEG 8
ILSVRC2012_val_00022305.JPEG 6
ILSVRC2012_val_00022308.JPEG 3
ILSVRC2012_val_00022320.JPEG 5
ILSVRC2012_val_00022329.JPEG 3
ILSVRC2012_val_00022332.JPEG 8
ILSVRC2012_val_00022334.JPEG 4
ILSVRC2012_val_00022337.JPEG 1
ILSVRC2012_val_00022341.JPEG 0
ILSVRC2012_val_00022350.JPEG 3
ILSVRC2012_val_00022351.JPEG 8
ILSVRC2012_val_00022355.JPEG 4
ILSVRC2012_val_00022359.JPEG 5
ILSVRC2012_val_00022361.JPEG 8
ILSVRC2012_val_00022364.JPEG 4
ILSVRC2012_val_00022376.JPEG 0
ILSVRC2012_val_00022394.JPEG 8
ILSVRC2012_val_00022402.JPEG 0
ILSVRC2012_val_00022420.JPEG 5
ILSVRC2012_val_00022421.JPEG 6
ILSVRC2012_val_00022422.JPEG 4
ILSVRC2012_val_00022437.JPEG 8
ILSVRC2012_val_00022439.JPEG 4
ILSVRC2012_val_00022441.JPEG 4
ILSVRC2012_val_00022442.JPEG 4
ILSVRC2012_val_00022469.JPEG 3
ILSVRC2012_val_00022485.JPEG 0
ILSVRC2012_val_00022521.JPEG 0
ILSVRC2012_val_00022525.JPEG 3
ILSVRC2012_val_00022535.JPEG 1
ILSVRC2012_val_00022537.JPEG 8
ILSVRC2012_val_00022565.JPEG 5
ILSVRC2012_val_00022576.JPEG 0
ILSVRC2012_val_00022588.JPEG 3
ILSVRC2012_val_00022596.JPEG 7
ILSVRC2012_val_00022608.JPEG 7
ILSVRC2012_val_00022619.JPEG 4
ILSVRC2012_val_00022660.JPEG 2
ILSVRC2012_val_00022676.JPEG 7
ILSVRC2012_val_00022691.JPEG 4
ILSVRC2012_val_00022692.JPEG 0
ILSVRC2012_val_00022705.JPEG 0
ILSVRC2012_val_00022710.JPEG 3
ILSVRC2012_val_00022712.JPEG 0
ILSVRC2012_val_00022737.JPEG 8
ILSVRC2012_val_00022740.JPEG 5
ILSVRC2012_val_00022745.JPEG 4
ILSVRC2012_val_00022749.JPEG 6
ILSVRC2012_val_00022765.JPEG 8
ILSVRC2012_val_00022767.JPEG 4
ILSVRC2012_val_00022769.JPEG 4
ILSVRC2012_val_00022772.JPEG 8
ILSVRC2012_val_00022786.JPEG 4
ILSVRC2012_val_00022791.JPEG 5
ILSVRC2012_val_00022806.JPEG 4
ILSVRC2012_val_00022822.JPEG 1
ILSVRC2012_val_00022841.JPEG 3
ILSVRC2012_val_00022842.JPEG 3
ILSVRC2012_val_00022853.JPEG 1
ILSVRC2012_val_00022866.JPEG 4
ILSVRC2012_val_00022868.JPEG 0
ILSVRC2012_val_00022874.JPEG 8
ILSVRC2012_val_00022896.JPEG 1
ILSVRC2012_val_00022912.JPEG 5
ILSVRC2012_val_00022915.JPEG 8
ILSVRC2012_val_00022916.JPEG 5
ILSVRC2012_val_00022919.JPEG 8
ILSVRC2012_val_00022948.JPEG 8
ILSVRC2012_val_00022967.JPEG 6
ILSVRC2012_val_00022970.JPEG 6
ILSVRC2012_val_00022992.JPEG 4
ILSVRC2012_val_00023013.JPEG 8
ILSVRC2012_val_00023021.JPEG 4
ILSVRC2012_val_00023049.JPEG 8
ILSVRC2012_val_00023073.JPEG 5
ILSVRC2012_val_00023092.JPEG 1
ILSVRC2012_val_00023097.JPEG 4
ILSVRC2012_val_00023099.JPEG 4
ILSVRC2012_val_00023118.JPEG 4
ILSVRC2012_val_00023144.JPEG 4
ILSVRC2012_val_00023154.JPEG 4
ILSVRC2012_val_00023188.JPEG 8
ILSVRC2012_val_00023190.JPEG 6
ILSVRC2012_val_00023194.JPEG 5
ILSVRC2012_val_00023228.JPEG 1
ILSVRC2012_val_00023230.JPEG 8
ILSVRC2012_val_00023251.JPEG 7
ILSVRC2012_val_00023255.JPEG 2
ILSVRC2012_val_00023258.JPEG 8
ILSVRC2012_val_00023262.JPEG 5
ILSVRC2012_val_00023264.JPEG 7
ILSVRC2012_val_00023267.JPEG 1
ILSVRC2012_val_00023268.JPEG 0
ILSVRC2012_val_00023270.JPEG 0
ILSVRC2012_val_00023281.JPEG 8
ILSVRC2012_val_00023305.JPEG 5
ILSVRC2012_val_00023308.JPEG 2
ILSVRC2012_val_00023338.JPEG 4
ILSVRC2012_val_00023339.JPEG 7
ILSVRC2012_val_00023340.JPEG 0
ILSVRC2012_val_00023342.JPEG 4
ILSVRC2012_val_00023344.JPEG 4
ILSVRC2012_val_00023347.JPEG 4
ILSVRC2012_val_00023371.JPEG 4
ILSVRC2012_val_00023381.JPEG 8
ILSVRC2012_val_00023390.JPEG 4
ILSVRC2012_val_00023393.JPEG 1
ILSVRC2012_val_00023394.JPEG 0
ILSVRC2012_val_00023406.JPEG 6
ILSVRC2012_val_00023413.JPEG 4
ILSVRC2012_val_00023426.JPEG 5
ILSVRC2012_val_00023468.JPEG 6
ILSVRC2012_val_00023469.JPEG 0
ILSVRC2012_val_00023480.JPEG 6
ILSVRC2012_val_00023486.JPEG 0
ILSVRC2012_val_00023500.JPEG 4
ILSVRC2012_val_00023514.JPEG 5
ILSVRC2012_val_00023515.JPEG 0
ILSVRC2012_val_00023531.JPEG 5
ILSVRC2012_val_00023533.JPEG 0
ILSVRC2012_val_00023550.JPEG 7
ILSVRC2012_val_00023570.JPEG 8
ILSVRC2012_val_00023583.JPEG 7
ILSVRC2012_val_00023595.JPEG 5
ILSVRC2012_val_00023596.JPEG 0
ILSVRC2012_val_00023601.JPEG 7
ILSVRC2012_val_00023602.JPEG 4
ILSVRC2012_val_00023604.JPEG 7
ILSVRC2012_val_00023624.JPEG 8
ILSVRC2012_val_00023637.JPEG 4
ILSVRC2012_val_00023642.JPEG 5
ILSVRC2012_val_00023650.JPEG 8
ILSVRC2012_val_00023654.JPEG 3
ILSVRC2012_val_00023677.JPEG 6
ILSVRC2012_val_00023686.JPEG 3
ILSVRC2012_val_00023689.JPEG 8
ILSVRC2012_val_00023696.JPEG 1
ILSVRC2012_val_00023703.JPEG 3
ILSVRC2012_val_00023709.JPEG 4
ILSVRC2012_val_00023719.JPEG 8
ILSVRC2012_val_00023731.JPEG 0
ILSVRC2012_val_00023735.JPEG 0
ILSVRC2012_val_00023758.JPEG 2
ILSVRC2012_val_00023764.JPEG 0
ILSVRC2012_val_00023772.JPEG 5
ILSVRC2012_val_00023779.JPEG 1
ILSVRC2012_val_00023780.JPEG 4
ILSVRC2012_val_00023785.JPEG 6
ILSVRC2012_val_00023786.JPEG 1
ILSVRC2012_val_00023796.JPEG 4
ILSVRC2012_val_00023798.JPEG 8
ILSVRC2012_val_00023801.JPEG 0
ILSVRC2012_val_00023802.JPEG 5
ILSVRC2012_val_00023805.JPEG 4
ILSVRC2012_val_00023806.JPEG 6
ILSVRC2012_val_00023826.JPEG 8
ILSVRC2012_val_00023827.JPEG 1
ILSVRC2012_val_00023832.JPEG 0
ILSVRC2012_val_00023833.JPEG 8
ILSVRC2012_val_00023834.JPEG 8
ILSVRC2012_val_00023840.JPEG 7
ILSVRC2012_val_00023844.JPEG 4
ILSVRC2012_val_00023846.JPEG 0
ILSVRC2012_val_00023852.JPEG 5
ILSVRC2012_val_00023855.JPEG 2
ILSVRC2012_val_00023871.JPEG 1
ILSVRC2012_val_00023890.JPEG 8
ILSVRC2012_val_00023897.JPEG 8
ILSVRC2012_val_00023898.JPEG 1
ILSVRC2012_val_00023906.JPEG 1
ILSVRC2012_val_00023940.JPEG 8
ILSVRC2012_val_00023955.JPEG 0
ILSVRC2012_val_00023973.JPEG 4
ILSVRC2012_val_00023991.JPEG 7
ILSVRC2012_val_00024000.JPEG 1
ILSVRC2012_val_00024010.JPEG 7
ILSVRC2012_val_00024011.JPEG 5
ILSVRC2012_val_00024014.JPEG 8
ILSVRC2012_val_00024029.JPEG 6
ILSVRC2012_val_00024030.JPEG 4
ILSVRC2012_val_00024040.JPEG 4
ILSVRC2012_val_00024058.JPEG 4
ILSVRC2012_val_00024063.JPEG 4
ILSVRC2012_val_00024082.JPEG 8
ILSVRC2012_val_00024098.JPEG 4
ILSVRC2012_val_00024102.JPEG 2
ILSVRC2012_val_00024106.JPEG 4
ILSVRC2012_val_00024107.JPEG 5
ILSVRC2012_val_00024121.JPEG 4
ILSVRC2012_val_00024136.JPEG 5
ILSVRC2012_val_00024140.JPEG 5
ILSVRC2012_val_00024163.JPEG 5
ILSVRC2012_val_00024167.JPEG 8
ILSVRC2012_val_00024172.JPEG 4
ILSVRC2012_val_00024192.JPEG 8
ILSVRC2012_val_00024220.JPEG 6
ILSVRC2012_val_00024221.JPEG 3
ILSVRC2012_val_00024226.JPEG 0
ILSVRC2012_val_00024250.JPEG 8
ILSVRC2012_val_00024253.JPEG 5
ILSVRC2012_val_00024273.JPEG 4
ILSVRC2012_val_00024277.JPEG 0
ILSVRC2012_val_00024284.JPEG 0
ILSVRC2012_val_00024294.JPEG 5
ILSVRC2012_val_00024315.JPEG 6
ILSVRC2012_val_00024336.JPEG 4
ILSVRC2012_val_00024345.JPEG 0
ILSVRC2012_val_00024381.JPEG 4
ILSVRC2012_val_00024386.JPEG 5
ILSVRC2012_val_00024395.JPEG 6
ILSVRC2012_val_00024396.JPEG 4
ILSVRC2012_val_00024398.JPEG 5
ILSVRC2012_val_00024417.JPEG 8
ILSVRC2012_val_00024423.JPEG 4
ILSVRC2012_val_00024426.JPEG 8
ILSVRC2012_val_00024427.JPEG 1
ILSVRC2012_val_00024428.JPEG 2
ILSVRC2012_val_00024429.JPEG 0
ILSVRC2012_val_00024437.JPEG 5
ILSVRC2012_val_00024438.JPEG 4
ILSVRC2012_val_00024447.JPEG 5
ILSVRC2012_val_00024458.JPEG 8
ILSVRC2012_val_00024467.JPEG 4
ILSVRC2012_val_00024483.JPEG 8
ILSVRC2012_val_00024488.JPEG 5
ILSVRC2012_val_00024494.JPEG 3
ILSVRC2012_val_00024500.JPEG 1
ILSVRC2012_val_00024507.JPEG 8
ILSVRC2012_val_00024525.JPEG 4
ILSVRC2012_val_00024530.JPEG 4
ILSVRC2012_val_00024531.JPEG 8
ILSVRC2012_val_00024538.JPEG 8
ILSVRC2012_val_00024555.JPEG 8
ILSVRC2012_val_00024557.JPEG 7
ILSVRC2012_val_00024558.JPEG 8
ILSVRC2012_val_00024572.JPEG 8
ILSVRC2012_val_00024581.JPEG 4
ILSVRC2012_val_00024582.JPEG 5
ILSVRC2012_val_00024592.JPEG 4
ILSVRC2012_val_00024600.JPEG 5
ILSVRC2012_val_00024608.JPEG 5
ILSVRC2012_val_00024612.JPEG 8
ILSVRC2012_val_00024622.JPEG 5
ILSVRC2012_val_00024625.JPEG 5
ILSVRC2012_val_00024630.JPEG 4
ILSVRC2012_val_00024655.JPEG 0
ILSVRC2012_val_00024666.JPEG 3
ILSVRC2012_val_00024676.JPEG 5
ILSVRC2012_val_00024726.JPEG 4
ILSVRC2012_val_00024732.JPEG 5
ILSVRC2012_val_00024736.JPEG 3
ILSVRC2012_val_00024737.JPEG 8
ILSVRC2012_val_00024743.JPEG 8
ILSVRC2012_val_00024755.JPEG 8
ILSVRC2012_val_00024760.JPEG 1
ILSVRC2012_val_00024767.JPEG 8
ILSVRC2012_val_00024768.JPEG 6
ILSVRC2012_val_00024773.JPEG 4
ILSVRC2012_val_00024816.JPEG 8
ILSVRC2012_val_00024818.JPEG 0
ILSVRC2012_val_00024823.JPEG 8
ILSVRC2012_val_00024840.JPEG 5
ILSVRC2012_val_00024844.JPEG 5
ILSVRC2012_val_00024845.JPEG 4
ILSVRC2012_val_00024848.JPEG 4
ILSVRC2012_val_00024850.JPEG 8
ILSVRC2012_val_00024868.JPEG 8
ILSVRC2012_val_00024875.JPEG 0
ILSVRC2012_val_00024885.JPEG 7
ILSVRC2012_val_00024886.JPEG 5
ILSVRC2012_val_00024908.JPEG 5
ILSVRC2012_val_00024914.JPEG 4
ILSVRC2012_val_00024916.JPEG 4
ILSVRC2012_val_00024921.JPEG 5
ILSVRC2012_val_00024926.JPEG 5
ILSVRC2012_val_00024938.JPEG 2
ILSVRC2012_val_00025031.JPEG 5
ILSVRC2012_val_00025033.JPEG 5
ILSVRC2012_val_00025055.JPEG 0
ILSVRC2012_val_00025058.JPEG 5
ILSVRC2012_val_00025061.JPEG 8
ILSVRC2012_val_00025085.JPEG 0
ILSVRC2012_val_00025089.JPEG 8
ILSVRC2012_val_00025120.JPEG 7
ILSVRC2012_val_00025130.JPEG 4
ILSVRC2012_val_00025141.JPEG 6
ILSVRC2012_val_00025168.JPEG 1
ILSVRC2012_val_00025174.JPEG 6
ILSVRC2012_val_00025188.JPEG 8
ILSVRC2012_val_00025200.JPEG 4
ILSVRC2012_val_00025212.JPEG 8
ILSVRC2012_val_00025218.JPEG 8
ILSVRC2012_val_00025224.JPEG 8
ILSVRC2012_val_00025225.JPEG 8
ILSVRC2012_val_00025226.JPEG 6
ILSVRC2012_val_00025251.JPEG 4
ILSVRC2012_val_00025252.JPEG 8
ILSVRC2012_val_00025256.JPEG 4
ILSVRC2012_val_00025261.JPEG 0
ILSVRC2012_val_00025262.JPEG 4
ILSVRC2012_val_00025268.JPEG 3
ILSVRC2012_val_00025288.JPEG 0
ILSVRC2012_val_00025312.JPEG 5
ILSVRC2012_val_00025343.JPEG 8
ILSVRC2012_val_00025355.JPEG 6
ILSVRC2012_val_00025356.JPEG 8
ILSVRC2012_val_00025360.JPEG 4
ILSVRC2012_val_00025364.JPEG 8
ILSVRC2012_val_00025371.JPEG 4
ILSVRC2012_val_00025388.JPEG 0
ILSVRC2012_val_00025391.JPEG 6
ILSVRC2012_val_00025396.JPEG 1
ILSVRC2012_val_00025400.JPEG 0
ILSVRC2012_val_00025407.JPEG 6
ILSVRC2012_val_00025423.JPEG 0
ILSVRC2012_val_00025429.JPEG 0
ILSVRC2012_val_00025441.JPEG 3
ILSVRC2012_val_00025449.JPEG 4
ILSVRC2012_val_00025470.JPEG 5
ILSVRC2012_val_00025471.JPEG 0
ILSVRC2012_val_00025479.JPEG 0
ILSVRC2012_val_00025495.JPEG 4
ILSVRC2012_val_00025519.JPEG 1
ILSVRC2012_val_00025543.JPEG 4
ILSVRC2012_val_00025546.JPEG 5
ILSVRC2012_val_00025549.JPEG 0
ILSVRC2012_val_00025551.JPEG 0
ILSVRC2012_val_00025567.JPEG 3
ILSVRC2012_val_00025580.JPEG 8
ILSVRC2012_val_00025589.JPEG 8
ILSVRC2012_val_00025596.JPEG 8
ILSVRC2012_val_00025604.JPEG 5
ILSVRC2012_val_00025608.JPEG 0
ILSVRC2012_val_00025611.JPEG 3
ILSVRC2012_val_00025615.JPEG 5
ILSVRC2012_val_00025616.JPEG 4
ILSVRC2012_val_00025631.JPEG 4
ILSVRC2012_val_00025633.JPEG 2
ILSVRC2012_val_00025650.JPEG 1
ILSVRC2012_val_00025658.JPEG 4
ILSVRC2012_val_00025667.JPEG 4
ILSVRC2012_val_00025677.JPEG 0
ILSVRC2012_val_00025690.JPEG 0
ILSVRC2012_val_00025691.JPEG 0
ILSVRC2012_val_00025694.JPEG 8
ILSVRC2012_val_00025698.JPEG 5
ILSVRC2012_val_00025710.JPEG 7
ILSVRC2012_val_00025717.JPEG 2
ILSVRC2012_val_00025723.JPEG 1
ILSVRC2012_val_00025729.JPEG 8
ILSVRC2012_val_00025739.JPEG 0
ILSVRC2012_val_00025754.JPEG 8
ILSVRC2012_val_00025758.JPEG 4
ILSVRC2012_val_00025764.JPEG 4
ILSVRC2012_val_00025785.JPEG 4
ILSVRC2012_val_00025800.JPEG 6
ILSVRC2012_val_00025807.JPEG 8
ILSVRC2012_val_00025810.JPEG 6
ILSVRC2012_val_00025824.JPEG 3
ILSVRC2012_val_00025835.JPEG 0
ILSVRC2012_val_00025855.JPEG 8
ILSVRC2012_val_00025871.JPEG 6
ILSVRC2012_val_00025872.JPEG 4
ILSVRC2012_val_00025876.JPEG 1
ILSVRC2012_val_00025886.JPEG 0
ILSVRC2012_val_00025887.JPEG 1
ILSVRC2012_val_00025911.JPEG 0
ILSVRC2012_val_00025924.JPEG 4
ILSVRC2012_val_00025928.JPEG 4
ILSVRC2012_val_00025937.JPEG 4
ILSVRC2012_val_00025960.JPEG 7
ILSVRC2012_val_00025961.JPEG 5
ILSVRC2012_val_00025968.JPEG 8
ILSVRC2012_val_00025970.JPEG 0
ILSVRC2012_val_00025974.JPEG 8
ILSVRC2012_val_00025979.JPEG 4
ILSVRC2012_val_00025998.JPEG 4
ILSVRC2012_val_00025999.JPEG 4
ILSVRC2012_val_00026012.JPEG 5
ILSVRC2012_val_00026021.JPEG 4
ILSVRC2012_val_00026040.JPEG 8
ILSVRC2012_val_00026043.JPEG 5
ILSVRC2012_val_00026049.JPEG 3
ILSVRC2012_val_00026051.JPEG 0
ILSVRC2012_val_00026056.JPEG 0
ILSVRC2012_val_00026059.JPEG 2
ILSVRC2012_val_00026068.JPEG 4
ILSVRC2012_val_00026072.JPEG 4
ILSVRC2012_val_00026081.JPEG 8
ILSVRC2012_val_00026084.JPEG 4
ILSVRC2012_val_00026085.JPEG 4
ILSVRC2012_val_00026090.JPEG 4
ILSVRC2012_val_00026094.JPEG 0
ILSVRC2012_val_00026108.JPEG 5
ILSVRC2012_val_00026112.JPEG 4
ILSVRC2012_val_00026115.JPEG 7
ILSVRC2012_val_00026138.JPEG 4
ILSVRC2012_val_00026141.JPEG 4
ILSVRC2012_val_00026155.JPEG 4
ILSVRC2012_val_00026156.JPEG 5
ILSVRC2012_val_00026168.JPEG 4
ILSVRC2012_val_00026181.JPEG 8
ILSVRC2012_val_00026199.JPEG 0
ILSVRC2012_val_00026202.JPEG 3
ILSVRC2012_val_00026213.JPEG 2
ILSVRC2012_val_00026217.JPEG 5
ILSVRC2012_val_00026222.JPEG 5
ILSVRC2012_val_00026232.JPEG 4
ILSVRC2012_val_00026234.JPEG 6
ILSVRC2012_val_00026244.JPEG 4
ILSVRC2012_val_00026246.JPEG 5
ILSVRC2012_val_00026258.JPEG 5
ILSVRC2012_val_00026284.JPEG 5
ILSVRC2012_val_00026314.JPEG 7
ILSVRC2012_val_00026323.JPEG 8
ILSVRC2012_val_00026324.JPEG 8
ILSVRC2012_val_00026343.JPEG 0
ILSVRC2012_val_00026349.JPEG 8
ILSVRC2012_val_00026353.JPEG 0
ILSVRC2012_val_00026367.JPEG 0
ILSVRC2012_val_00026370.JPEG 0
ILSVRC2012_val_00026375.JPEG 4
ILSVRC2012_val_00026378.JPEG 7
ILSVRC2012_val_00026399.JPEG 3
ILSVRC2012_val_00026403.JPEG 1
ILSVRC2012_val_00026412.JPEG 1
ILSVRC2012_val_00026420.JPEG 4
ILSVRC2012_val_00026446.JPEG 3
ILSVRC2012_val_00026481.JPEG 4
ILSVRC2012_val_00026484.JPEG 8
ILSVRC2012_val_00026488.JPEG 4
ILSVRC2012_val_00026489.JPEG 8
ILSVRC2012_val_00026496.JPEG 5
ILSVRC2012_val_00026499.JPEG 5
ILSVRC2012_val_00026502.JPEG 4
ILSVRC2012_val_00026509.JPEG 0
ILSVRC2012_val_00026511.JPEG 7
ILSVRC2012_val_00026518.JPEG 8
ILSVRC2012_val_00026557.JPEG 8
ILSVRC2012_val_00026567.JPEG 8
ILSVRC2012_val_00026590.JPEG 8
ILSVRC2012_val_00026591.JPEG 8
ILSVRC2012_val_00026597.JPEG 7
ILSVRC2012_val_00026603.JPEG 5
ILSVRC2012_val_00026611.JPEG 6
ILSVRC2012_val_00026620.JPEG 8
ILSVRC2012_val_00026634.JPEG 3
ILSVRC2012_val_00026674.JPEG 4
ILSVRC2012_val_00026679.JPEG 4
ILSVRC2012_val_00026691.JPEG 0
ILSVRC2012_val_00026698.JPEG 0
ILSVRC2012_val_00026725.JPEG 5
ILSVRC2012_val_00026737.JPEG 5
ILSVRC2012_val_00026757.JPEG 5
ILSVRC2012_val_00026770.JPEG 6
ILSVRC2012_val_00026775.JPEG 8
ILSVRC2012_val_00026811.JPEG 4
ILSVRC2012_val_00026828.JPEG 0
ILSVRC2012_val_00026830.JPEG 1
ILSVRC2012_val_00026843.JPEG 7
ILSVRC2012_val_00026845.JPEG 4
ILSVRC2012_val_00026862.JPEG 7
ILSVRC2012_val_00026873.JPEG 6
ILSVRC2012_val_00026885.JPEG 8
ILSVRC2012_val_00026893.JPEG 1
ILSVRC2012_val_00026894.JPEG 8
ILSVRC2012_val_00026904.JPEG 5
ILSVRC2012_val_00026924.JPEG 4
ILSVRC2012_val_00026925.JPEG 7
ILSVRC2012_val_00026932.JPEG 6
ILSVRC2012_val_00026965.JPEG 4
ILSVRC2012_val_00026967.JPEG 4
ILSVRC2012_val_00026969.JPEG 0
ILSVRC2012_val_00026995.JPEG 5
ILSVRC2012_val_00027008.JPEG 4
ILSVRC2012_val_00027013.JPEG 1
ILSVRC2012_val_00027031.JPEG 8
ILSVRC2012_val_00027047.JPEG 4
ILSVRC2012_val_00027062.JPEG 8
ILSVRC2012_val_00027070.JPEG 4
ILSVRC2012_val_00027074.JPEG 3
ILSVRC2012_val_00027102.JPEG 4
ILSVRC2012_val_00027108.JPEG 5
ILSVRC2012_val_00027124.JPEG 0
ILSVRC2012_val_00027153.JPEG 8
ILSVRC2012_val_00027163.JPEG 3
ILSVRC2012_val_00027189.JPEG 1
ILSVRC2012_val_00027218.JPEG 7
ILSVRC2012_val_00027226.JPEG 1
ILSVRC2012_val_00027264.JPEG 6
ILSVRC2012_val_00027313.JPEG 1
ILSVRC2012_val_00027323.JPEG 5
ILSVRC2012_val_00027333.JPEG 5
ILSVRC2012_val_00027360.JPEG 0
ILSVRC2012_val_00027365.JPEG 5
ILSVRC2012_val_00027378.JPEG 8
ILSVRC2012_val_00027387.JPEG 8
ILSVRC2012_val_00027400.JPEG 6
ILSVRC2012_val_00027434.JPEG 4
ILSVRC2012_val_00027443.JPEG 5
ILSVRC2012_val_00027444.JPEG 6
ILSVRC2012_val_00027448.JPEG 1
ILSVRC2012_val_00027451.JPEG 2
ILSVRC2012_val_00027478.JPEG 4
ILSVRC2012_val_00027486.JPEG 4
ILSVRC2012_val_00027489.JPEG 5
ILSVRC2012_val_00027491.JPEG 5
ILSVRC2012_val_00027500.JPEG 6
ILSVRC2012_val_00027539.JPEG 1
ILSVRC2012_val_00027555.JPEG 4
ILSVRC2012_val_00027557.JPEG 8
ILSVRC2012_val_00027558.JPEG 8
ILSVRC2012_val_00027586.JPEG 8
ILSVRC2012_val_00027602.JPEG 4
ILSVRC2012_val_00027608.JPEG 8
ILSVRC2012_val_00027634.JPEG 8
ILSVRC2012_val_00027656.JPEG 4
ILSVRC2012_val_00027668.JPEG 5
ILSVRC2012_val_00027670.JPEG 5
ILSVRC2012_val_00027695.JPEG 1
ILSVRC2012_val_00027705.JPEG 5
ILSVRC2012_val_00027714.JPEG 8
ILSVRC2012_val_00027717.JPEG 8
ILSVRC2012_val_00027724.JPEG 3
ILSVRC2012_val_00027737.JPEG 4
ILSVRC2012_val_00027791.JPEG 8
ILSVRC2012_val_00027799.JPEG 6
ILSVRC2012_val_00027803.JPEG 8
ILSVRC2012_val_00027809.JPEG 4
ILSVRC2012_val_00027816.JPEG 4
ILSVRC2012_val_00027820.JPEG 0
ILSVRC2012_val_00027834.JPEG 5
ILSVRC2012_val_00027837.JPEG 0
ILSVRC2012_val_00027844.JPEG 8
ILSVRC2012_val_00027849.JPEG 5
ILSVRC2012_val_00027857.JPEG 8
ILSVRC2012_val_00027858.JPEG 3
ILSVRC2012_val_00027859.JPEG 3
ILSVRC2012_val_00027869.JPEG 2
ILSVRC2012_val_00027877.JPEG 3
ILSVRC2012_val_00027906.JPEG 1
ILSVRC2012_val_00027932.JPEG 5
ILSVRC2012_val_00027937.JPEG 0
ILSVRC2012_val_00027941.JPEG 5
ILSVRC2012_val_00027946.JPEG 4
ILSVRC2012_val_00027954.JPEG 8
ILSVRC2012_val_00027985.JPEG 4
ILSVRC2012_val_00027986.JPEG 4
ILSVRC2012_val_00027992.JPEG 0
ILSVRC2012_val_00028007.JPEG 4
ILSVRC2012_val_00028020.JPEG 6
ILSVRC2012_val_00028041.JPEG 2
ILSVRC2012_val_00028049.JPEG 5
ILSVRC2012_val_00028052.JPEG 0
ILSVRC2012_val_00028068.JPEG 8
ILSVRC2012_val_00028096.JPEG 7
ILSVRC2012_val_00028113.JPEG 2
ILSVRC2012_val_00028119.JPEG 4
ILSVRC2012_val_00028122.JPEG 8
ILSVRC2012_val_00028146.JPEG 0
ILSVRC2012_val_00028159.JPEG 4
ILSVRC2012_val_00028162.JPEG 3
ILSVRC2012_val_00028167.JPEG 4
ILSVRC2012_val_00028177.JPEG 5
ILSVRC2012_val_00028184.JPEG 5
ILSVRC2012_val_00028208.JPEG 4
ILSVRC2012_val_00028213.JPEG 1
ILSVRC2012_val_00028219.JPEG 5
ILSVRC2012_val_00028220.JPEG 5
ILSVRC2012_val_00028225.JPEG 2
ILSVRC2012_val_00028231.JPEG 5
ILSVRC2012_val_00028248.JPEG 8
ILSVRC2012_val_00028250.JPEG 8
ILSVRC2012_val_00028270.JPEG 8
ILSVRC2012_val_00028290.JPEG 5
ILSVRC2012_val_00028291.JPEG 5
ILSVRC2012_val_00028296.JPEG 5
ILSVRC2012_val_00028302.JPEG 1
ILSVRC2012_val_00028321.JPEG 0
ILSVRC2012_val_00028331.JPEG 5
ILSVRC2012_val_00028338.JPEG 6
ILSVRC2012_val_00028343.JPEG 8
ILSVRC2012_val_00028352.JPEG 2
ILSVRC2012_val_00028380.JPEG 7
ILSVRC2012_val_00028381.JPEG 8
ILSVRC2012_val_00028395.JPEG 4
ILSVRC2012_val_00028414.JPEG 4
ILSVRC2012_val_00028415.JPEG 6
ILSVRC2012_val_00028425.JPEG 0
ILSVRC2012_val_00028427.JPEG 8
ILSVRC2012_val_00028438.JPEG 4
ILSVRC2012_val_00028453.JPEG 8
ILSVRC2012_val_00028469.JPEG 8
ILSVRC2012_val_00028492.JPEG 8
ILSVRC2012_val_00028522.JPEG 4
ILSVRC2012_val_00028523.JPEG 0
ILSVRC2012_val_00028529.JPEG 4
ILSVRC2012_val_00028533.JPEG 8
ILSVRC2012_val_00028545.JPEG 4
ILSVRC2012_val_00028548.JPEG 4
ILSVRC2012_val_00028562.JPEG 5
ILSVRC2012_val_00028568.JPEG 4
ILSVRC2012_val_00028570.JPEG 4
ILSVRC2012_val_00028573.JPEG 4
ILSVRC2012_val_00028585.JPEG 5
ILSVRC2012_val_00028594.JPEG 7
ILSVRC2012_val_00028599.JPEG 3
ILSVRC2012_val_00028600.JPEG 4
ILSVRC2012_val_00028604.JPEG 4
ILSVRC2012_val_00028610.JPEG 5
ILSVRC2012_val_00028616.JPEG 0
ILSVRC2012_val_00028628.JPEG 1
ILSVRC2012_val_00028629.JPEG 2
ILSVRC2012_val_00028631.JPEG 0
ILSVRC2012_val_00028636.JPEG 5
ILSVRC2012_val_00028656.JPEG 4
ILSVRC2012_val_00028667.JPEG 4
ILSVRC2012_val_00028673.JPEG 2
ILSVRC2012_val_00028692.JPEG 8
ILSVRC2012_val_00028697.JPEG 8
ILSVRC2012_val_00028730.JPEG 7
ILSVRC2012_val_00028746.JPEG 5
ILSVRC2012_val_00028749.JPEG 6
ILSVRC2012_val_00028750.JPEG 8
ILSVRC2012_val_00028760.JPEG 3
ILSVRC2012_val_00028765.JPEG 4
ILSVRC2012_val_00028784.JPEG 5
ILSVRC2012_val_00028794.JPEG 8
ILSVRC2012_val_00028801.JPEG 4
ILSVRC2012_val_00028803.JPEG 8
ILSVRC2012_val_00028829.JPEG 1
ILSVRC2012_val_00028862.JPEG 4
ILSVRC2012_val_00028883.JPEG 5
ILSVRC2012_val_00028888.JPEG 5
ILSVRC2012_val_00028901.JPEG 0
ILSVRC2012_val_00028908.JPEG 0
ILSVRC2012_val_00028925.JPEG 5
ILSVRC2012_val_00028937.JPEG 6
ILSVRC2012_val_00028968.JPEG 6
ILSVRC2012_val_00028970.JPEG 1
ILSVRC2012_val_00028982.JPEG 5
ILSVRC2012_val_00028992.JPEG 0
ILSVRC2012_val_00029022.JPEG 4
ILSVRC2012_val_00029024.JPEG 0
ILSVRC2012_val_00029058.JPEG 0
ILSVRC2012_val_00029062.JPEG 8
ILSVRC2012_val_00029070.JPEG 4
ILSVRC2012_val_00029086.JPEG 8
ILSVRC2012_val_00029097.JPEG 5
ILSVRC2012_val_00029108.JPEG 5
ILSVRC2012_val_00029109.JPEG 8
ILSVRC2012_val_00029150.JPEG 4
ILSVRC2012_val_00029160.JPEG 5
ILSVRC2012_val_00029161.JPEG 5
ILSVRC2012_val_00029190.JPEG 0
ILSVRC2012_val_00029196.JPEG 8
ILSVRC2012_val_00029210.JPEG 4
ILSVRC2012_val_00029226.JPEG 4
ILSVRC2012_val_00029227.JPEG 8
ILSVRC2012_val_00029238.JPEG 6
ILSVRC2012_val_00029241.JPEG 5
ILSVRC2012_val_00029245.JPEG 4
ILSVRC2012_val_00029269.JPEG 5
ILSVRC2012_val_00029277.JPEG 0
ILSVRC2012_val_00029283.JPEG 4
ILSVRC2012_val_00029284.JPEG 5
ILSVRC2012_val_00029297.JPEG 4
ILSVRC2012_val_00029298.JPEG 4
ILSVRC2012_val_00029307.JPEG 8
ILSVRC2012_val_00029313.JPEG 0
ILSVRC2012_val_00029324.JPEG 3
ILSVRC2012_val_00029325.JPEG 8
ILSVRC2012_val_00029347.JPEG 4
ILSVRC2012_val_00029351.JPEG 4
ILSVRC2012_val_00029353.JPEG 0
ILSVRC2012_val_00029356.JPEG 4
ILSVRC2012_val_00029364.JPEG 0
ILSVRC2012_val_00029373.JPEG 8
ILSVRC2012_val_00029394.JPEG 5
ILSVRC2012_val_00029397.JPEG 1
ILSVRC2012_val_00029410.JPEG 8
ILSVRC2012_val_00029419.JPEG 0
ILSVRC2012_val_00029421.JPEG 8
ILSVRC2012_val_00029442.JPEG 8
ILSVRC2012_val_00029444.JPEG 8
ILSVRC2012_val_00029459.JPEG 5
ILSVRC2012_val_00029465.JPEG 5
ILSVRC2012_val_00029466.JPEG 4
ILSVRC2012_val_00029471.JPEG 7
ILSVRC2012_val_00029472.JPEG 4
ILSVRC2012_val_00029524.JPEG 8
ILSVRC2012_val_00029528.JPEG 6
ILSVRC2012_val_00029539.JPEG 8
ILSVRC2012_val_00029571.JPEG 4
ILSVRC2012_val_00029576.JPEG 6
ILSVRC2012_val_00029587.JPEG 6
ILSVRC2012_val_00029589.JPEG 4
ILSVRC2012_val_00029605.JPEG 7
ILSVRC2012_val_00029638.JPEG 6
ILSVRC2012_val_00029654.JPEG 4
ILSVRC2012_val_00029660.JPEG 8
ILSVRC2012_val_00029678.JPEG 2
ILSVRC2012_val_00029693.JPEG 0
ILSVRC2012_val_00029698.JPEG 4
ILSVRC2012_val_00029703.JPEG 5
ILSVRC2012_val_00029721.JPEG 5
ILSVRC2012_val_00029726.JPEG 3
ILSVRC2012_val_00029727.JPEG 2
ILSVRC2012_val_00029738.JPEG 5
ILSVRC2012_val_00029754.JPEG 0
ILSVRC2012_val_00029759.JPEG 8
ILSVRC2012_val_00029774.JPEG 0
ILSVRC2012_val_00029785.JPEG 4
ILSVRC2012_val_00029789.JPEG 5
ILSVRC2012_val_00029790.JPEG 6
ILSVRC2012_val_00029795.JPEG 8
ILSVRC2012_val_00029799.JPEG 0
ILSVRC2012_val_00029804.JPEG 5
ILSVRC2012_val_00029806.JPEG 3
ILSVRC2012_val_00029812.JPEG 7
ILSVRC2012_val_00029818.JPEG 8
ILSVRC2012_val_00029834.JPEG 0
ILSVRC2012_val_00029839.JPEG 1
ILSVRC2012_val_00029843.JPEG 8
ILSVRC2012_val_00029856.JPEG 8
ILSVRC2012_val_00029864.JPEG 1
ILSVRC2012_val_00029877.JPEG 6
ILSVRC2012_val_00029926.JPEG 5
ILSVRC2012_val_00029929.JPEG 0
ILSVRC2012_val_00029943.JPEG 8
ILSVRC2012_val_00029948.JPEG 4
ILSVRC2012_val_00029956.JPEG 4
ILSVRC2012_val_00029972.JPEG 4
ILSVRC2012_val_00029991.JPEG 4
ILSVRC2012_val_00030000.JPEG 4
ILSVRC2012_val_00030010.JPEG 4
ILSVRC2012_val_00030028.JPEG 4
ILSVRC2012_val_00030036.JPEG 4
ILSVRC2012_val_00030052.JPEG 1
ILSVRC2012_val_00030054.JPEG 8
ILSVRC2012_val_00030098.JPEG 6
ILSVRC2012_val_00030101.JPEG 8
ILSVRC2012_val_00030116.JPEG 4
ILSVRC2012_val_00030148.JPEG 4
ILSVRC2012_val_00030163.JPEG 3
ILSVRC2012_val_00030179.JPEG 6
ILSVRC2012_val_00030191.JPEG 5
ILSVRC2012_val_00030196.JPEG 0
ILSVRC2012_val_00030222.JPEG 5
ILSVRC2012_val_00030233.JPEG 5
ILSVRC2012_val_00030245.JPEG 4
ILSVRC2012_val_00030255.JPEG 0
ILSVRC2012_val_00030260.JPEG 6
ILSVRC2012_val_00030261.JPEG 0
ILSVRC2012_val_00030278.JPEG 4
ILSVRC2012_val_00030294.JPEG 8
ILSVRC2012_val_00030309.JPEG 6
ILSVRC2012_val_00030313.JPEG 5
ILSVRC2012_val_00030340.JPEG 6
ILSVRC2012_val_00030342.JPEG 2
ILSVRC2012_val_00030343.JPEG 3
ILSVRC2012_val_00030352.JPEG 2
ILSVRC2012_val_00030362.JPEG 5
ILSVRC2012_val_00030391.JPEG 4
ILSVRC2012_val_00030396.JPEG 7
ILSVRC2012_val_00030397.JPEG 4
ILSVRC2012_val_00030400.JPEG 4
ILSVRC2012_val_00030406.JPEG 3
ILSVRC2012_val_00030408.JPEG 7
ILSVRC2012_val_00030419.JPEG 8
ILSVRC2012_val_00030426.JPEG 5
ILSVRC2012_val_00030431.JPEG 4
ILSVRC2012_val_00030448.JPEG 4
ILSVRC2012_val_00030459.JPEG 8
ILSVRC2012_val_00030466.JPEG 8
ILSVRC2012_val_00030472.JPEG 8
ILSVRC2012_val_00030474.JPEG 8
ILSVRC2012_val_00030478.JPEG 2
ILSVRC2012_val_00030504.JPEG 7
ILSVRC2012_val_00030505.JPEG 8
ILSVRC2012_val_00030507.JPEG 4
ILSVRC2012_val_00030510.JPEG 8
ILSVRC2012_val_00030518.JPEG 0
ILSVRC2012_val_00030535.JPEG 8
ILSVRC2012_val_00030537.JPEG 8
ILSVRC2012_val_00030540.JPEG 0
ILSVRC2012_val_00030555.JPEG 0
ILSVRC2012_val_00030568.JPEG 4
ILSVRC2012_val_00030593.JPEG 3
ILSVRC2012_val_00030596.JPEG 8
ILSVRC2012_val_00030602.JPEG 5
ILSVRC2012_val_00030605.JPEG 5
ILSVRC2012_val_00030622.JPEG 2
ILSVRC2012_val_00030629.JPEG 4
ILSVRC2012_val_00030635.JPEG 6
ILSVRC2012_val_00030638.JPEG 8
ILSVRC2012_val_00030642.JPEG 0
ILSVRC2012_val_00030654.JPEG 6
ILSVRC2012_val_00030660.JPEG 0
ILSVRC2012_val_00030663.JPEG 0
ILSVRC2012_val_00030667.JPEG 5
ILSVRC2012_val_00030690.JPEG 5
ILSVRC2012_val_00030697.JPEG 8
ILSVRC2012_val_00030702.JPEG 4
ILSVRC2012_val_00030705.JPEG 0
ILSVRC2012_val_00030706.JPEG 1
ILSVRC2012_val_00030712.JPEG 5
ILSVRC2012_val_00030713.JPEG 4
ILSVRC2012_val_00030715.JPEG 8
ILSVRC2012_val_00030727.JPEG 5
ILSVRC2012_val_00030729.JPEG 5
ILSVRC2012_val_00030734.JPEG 4
ILSVRC2012_val_00030736.JPEG 3
ILSVRC2012_val_00030747.JPEG 0
ILSVRC2012_val_00030778.JPEG 8
ILSVRC2012_val_00030781.JPEG 6
ILSVRC2012_val_00030792.JPEG 8
ILSVRC2012_val_00030795.JPEG 8
ILSVRC2012_val_00030829.JPEG 8
ILSVRC2012_val_00030837.JPEG 4
ILSVRC2012_val_00030859.JPEG 8
ILSVRC2012_val_00030887.JPEG 4
ILSVRC2012_val_00030891.JPEG 4
ILSVRC2012_val_00030902.JPEG 8
ILSVRC2012_val_00030907.JPEG 7
ILSVRC2012_val_00030921.JPEG 8
ILSVRC2012_val_00030929.JPEG 1
ILSVRC2012_val_00030936.JPEG 8
ILSVRC2012_val_00030964.JPEG 3
ILSVRC2012_val_00030998.JPEG 6
ILSVRC2012_val_00031004.JPEG 6
ILSVRC2012_val_00031015.JPEG 7
ILSVRC2012_val_00031033.JPEG 8
ILSVRC2012_val_00031036.JPEG 8
ILSVRC2012_val_00031043.JPEG 6
ILSVRC2012_val_00031050.JPEG 8
ILSVRC2012_val_00031062.JPEG 8
ILSVRC2012_val_00031083.JPEG 5
ILSVRC2012_val_00031097.JPEG 8
ILSVRC2012_val_00031099.JPEG 7
ILSVRC2012_val_00031100.JPEG 5
ILSVRC2012_val_00031128.JPEG 8
ILSVRC2012_val_00031140.JPEG 8
ILSVRC2012_val_00031143.JPEG 6
ILSVRC2012_val_00031147.JPEG 8
ILSVRC2012_val_00031156.JPEG 0
ILSVRC2012_val_00031167.JPEG 8
ILSVRC2012_val_00031168.JPEG 8
ILSVRC2012_val_00031179.JPEG 3
ILSVRC2012_val_00031180.JPEG 1
ILSVRC2012_val_00031185.JPEG 1
ILSVRC2012_val_00031190.JPEG 5
ILSVRC2012_val_00031194.JPEG 6
ILSVRC2012_val_00031195.JPEG 5
ILSVRC2012_val_00031206.JPEG 0
ILSVRC2012_val_00031222.JPEG 6
ILSVRC2012_val_00031223.JPEG 0
ILSVRC2012_val_00031227.JPEG 8
ILSVRC2012_val_00031237.JPEG 8
ILSVRC2012_val_00031255.JPEG 6
ILSVRC2012_val_00031259.JPEG 0
ILSVRC2012_val_00031260.JPEG 5
ILSVRC2012_val_00031267.JPEG 8
ILSVRC2012_val_00031275.JPEG 3
ILSVRC2012_val_00031294.JPEG 5
ILSVRC2012_val_00031298.JPEG 4
ILSVRC2012_val_00031305.JPEG 6
ILSVRC2012_val_00031335.JPEG 8
ILSVRC2012_val_00031342.JPEG 4
ILSVRC2012_val_00031361.JPEG 1
ILSVRC2012_val_00031378.JPEG 0
ILSVRC2012_val_00031380.JPEG 4
ILSVRC2012_val_00031389.JPEG 3
ILSVRC2012_val_00031392.JPEG 4
ILSVRC2012_val_00031403.JPEG 5
ILSVRC2012_val_00031411.JPEG 0
ILSVRC2012_val_00031429.JPEG 8
ILSVRC2012_val_00031432.JPEG 4
ILSVRC2012_val_00031434.JPEG 4
ILSVRC2012_val_00031449.JPEG 4
ILSVRC2012_val_00031453.JPEG 0
ILSVRC2012_val_00031467.JPEG 3
ILSVRC2012_val_00031472.JPEG 8
ILSVRC2012_val_00031479.JPEG 8
ILSVRC2012_val_00031488.JPEG 8
ILSVRC2012_val_00031502.JPEG 8
ILSVRC2012_val_00031506.JPEG 8
ILSVRC2012_val_00031524.JPEG 8
ILSVRC2012_val_00031531.JPEG 0
ILSVRC2012_val_00031541.JPEG 3
ILSVRC2012_val_00031547.JPEG 0
ILSVRC2012_val_00031562.JPEG 5
ILSVRC2012_val_00031573.JPEG 8
ILSVRC2012_val_00031598.JPEG 2
ILSVRC2012_val_00031601.JPEG 0
ILSVRC2012_val_00031626.JPEG 0
ILSVRC2012_val_00031638.JPEG 8
ILSVRC2012_val_00031640.JPEG 0
ILSVRC2012_val_00031648.JPEG 8
ILSVRC2012_val_00031660.JPEG 8
ILSVRC2012_val_00031674.JPEG 3
ILSVRC2012_val_00031689.JPEG 4
ILSVRC2012_val_00031691.JPEG 5
ILSVRC2012_val_00031696.JPEG 8
ILSVRC2012_val_00031703.JPEG 6
ILSVRC2012_val_00031741.JPEG 6
ILSVRC2012_val_00031747.JPEG 0
ILSVRC2012_val_00031750.JPEG 5
ILSVRC2012_val_00031762.JPEG 5
ILSVRC2012_val_00031766.JPEG 8
ILSVRC2012_val_00031769.JPEG 5
ILSVRC2012_val_00031774.JPEG 3
ILSVRC2012_val_00031776.JPEG 4
ILSVRC2012_val_00031793.JPEG 3
ILSVRC2012_val_00031806.JPEG 4
ILSVRC2012_val_00031815.JPEG 3
ILSVRC2012_val_00031820.JPEG 8
ILSVRC2012_val_00031824.JPEG 4
ILSVRC2012_val_00031826.JPEG 7
ILSVRC2012_val_00031829.JPEG 3
ILSVRC2012_val_00031847.JPEG 4
ILSVRC2012_val_00031854.JPEG 5
ILSVRC2012_val_00031864.JPEG 0
ILSVRC2012_val_00031876.JPEG 0
ILSVRC2012_val_00031879.JPEG 4
ILSVRC2012_val_00031880.JPEG 5
ILSVRC2012_val_00031882.JPEG 0
ILSVRC2012_val_00031887.JPEG 8
ILSVRC2012_val_00031903.JPEG 8
ILSVRC2012_val_00031905.JPEG 0
ILSVRC2012_val_00031916.JPEG 5
ILSVRC2012_val_00031920.JPEG 8
ILSVRC2012_val_00031923.JPEG 7
ILSVRC2012_val_00031925.JPEG 8
ILSVRC2012_val_00031928.JPEG 8
ILSVRC2012_val_00031929.JPEG 5
ILSVRC2012_val_00031932.JPEG 4
ILSVRC2012_val_00031935.JPEG 6
ILSVRC2012_val_00031938.JPEG 4
ILSVRC2012_val_00031939.JPEG 5
ILSVRC2012_val_00031942.JPEG 5
ILSVRC2012_val_00031945.JPEG 8
ILSVRC2012_val_00031957.JPEG 5
ILSVRC2012_val_00031959.JPEG 8
ILSVRC2012_val_00031961.JPEG 8
ILSVRC2012_val_00031989.JPEG 5
ILSVRC2012_val_00032006.JPEG 5
ILSVRC2012_val_00032023.JPEG 8
ILSVRC2012_val_00032049.JPEG 0
ILSVRC2012_val_00032061.JPEG 2
ILSVRC2012_val_00032062.JPEG 4
ILSVRC2012_val_00032067.JPEG 5
ILSVRC2012_val_00032072.JPEG 4
ILSVRC2012_val_00032080.JPEG 5
ILSVRC2012_val_00032104.JPEG 2
ILSVRC2012_val_00032113.JPEG 4
ILSVRC2012_val_00032122.JPEG 4
ILSVRC2012_val_00032124.JPEG 0
ILSVRC2012_val_00032128.JPEG 4
ILSVRC2012_val_00032133.JPEG 5
ILSVRC2012_val_00032135.JPEG 3
ILSVRC2012_val_00032141.JPEG 4
ILSVRC2012_val_00032158.JPEG 4
ILSVRC2012_val_00032159.JPEG 4
ILSVRC2012_val_00032172.JPEG 8
ILSVRC2012_val_00032186.JPEG 0
ILSVRC2012_val_00032193.JPEG 5
ILSVRC2012_val_00032197.JPEG 6
ILSVRC2012_val_00032223.JPEG 5
ILSVRC2012_val_00032226.JPEG 0
ILSVRC2012_val_00032239.JPEG 0
ILSVRC2012_val_00032265.JPEG 8
ILSVRC2012_val_00032273.JPEG 5
ILSVRC2012_val_00032289.JPEG 6
ILSVRC2012_val_00032295.JPEG 4
ILSVRC2012_val_00032301.JPEG 0
ILSVRC2012_val_00032303.JPEG 8
ILSVRC2012_val_00032304.JPEG 0
ILSVRC2012_val_00032318.JPEG 0
ILSVRC2012_val_00032328.JPEG 1
ILSVRC2012_val_00032344.JPEG 4
ILSVRC2012_val_00032350.JPEG 4
ILSVRC2012_val_00032352.JPEG 8
ILSVRC2012_val_00032362.JPEG 4
ILSVRC2012_val_00032369.JPEG 6
ILSVRC2012_val_00032374.JPEG 5
ILSVRC2012_val_00032375.JPEG 6
ILSVRC2012_val_00032390.JPEG 8
ILSVRC2012_val_00032396.JPEG 5
ILSVRC2012_val_00032405.JPEG 3
ILSVRC2012_val_00032409.JPEG 4
ILSVRC2012_val_00032415.JPEG 2
ILSVRC2012_val_00032439.JPEG 6
ILSVRC2012_val_00032443.JPEG 8
ILSVRC2012_val_00032473.JPEG 4
ILSVRC2012_val_00032483.JPEG 6
ILSVRC2012_val_00032492.JPEG 4
ILSVRC2012_val_00032503.JPEG 4
ILSVRC2012_val_00032504.JPEG 8
ILSVRC2012_val_00032519.JPEG 6
ILSVRC2012_val_00032533.JPEG 8
ILSVRC2012_val_00032547.JPEG 7
ILSVRC2012_val_00032551.JPEG 8
ILSVRC2012_val_00032566.JPEG 6
ILSVRC2012_val_00032579.JPEG 6
ILSVRC2012_val_00032582.JPEG 0
ILSVRC2012_val_00032591.JPEG 0
ILSVRC2012_val_00032609.JPEG 1
ILSVRC2012_val_00032617.JPEG 4
ILSVRC2012_val_00032624.JPEG 8
ILSVRC2012_val_00032637.JPEG 1
ILSVRC2012_val_00032646.JPEG 0
ILSVRC2012_val_00032655.JPEG 5
ILSVRC2012_val_00032661.JPEG 8
ILSVRC2012_val_00032665.JPEG 6
ILSVRC2012_val_00032684.JPEG 5
ILSVRC2012_val_00032700.JPEG 3
ILSVRC2012_val_00032705.JPEG 8
ILSVRC2012_val_00032732.JPEG 5
ILSVRC2012_val_00032774.JPEG 0
ILSVRC2012_val_00032805.JPEG 3
ILSVRC2012_val_00032840.JPEG 6
ILSVRC2012_val_00032843.JPEG 4
ILSVRC2012_val_00032871.JPEG 8
ILSVRC2012_val_00032874.JPEG 5
ILSVRC2012_val_00032879.JPEG 4
ILSVRC2012_val_00032907.JPEG 6
ILSVRC2012_val_00032910.JPEG 1
ILSVRC2012_val_00032916.JPEG 2
ILSVRC2012_val_00032917.JPEG 2
ILSVRC2012_val_00032922.JPEG 6
ILSVRC2012_val_00032964.JPEG 5
ILSVRC2012_val_00032966.JPEG 2
ILSVRC2012_val_00032975.JPEG 0
ILSVRC2012_val_00032979.JPEG 6
ILSVRC2012_val_00032982.JPEG 4
ILSVRC2012_val_00032985.JPEG 4
ILSVRC2012_val_00032986.JPEG 8
ILSVRC2012_val_00032989.JPEG 8
ILSVRC2012_val_00032991.JPEG 0
ILSVRC2012_val_00033014.JPEG 7
ILSVRC2012_val_00033021.JPEG 8
ILSVRC2012_val_00033035.JPEG 8
ILSVRC2012_val_00033045.JPEG 4
ILSVRC2012_val_00033053.JPEG 8
ILSVRC2012_val_00033056.JPEG 5
ILSVRC2012_val_00033059.JPEG 4
ILSVRC2012_val_00033076.JPEG 4
ILSVRC2012_val_00033078.JPEG 4
ILSVRC2012_val_00033080.JPEG 5
ILSVRC2012_val_00033084.JPEG 2
ILSVRC2012_val_00033098.JPEG 4
ILSVRC2012_val_00033107.JPEG 5
ILSVRC2012_val_00033147.JPEG 4
ILSVRC2012_val_00033149.JPEG 0
ILSVRC2012_val_00033152.JPEG 6
ILSVRC2012_val_00033162.JPEG 4
ILSVRC2012_val_00033167.JPEG 4
ILSVRC2012_val_00033184.JPEG 8
ILSVRC2012_val_00033186.JPEG 4
ILSVRC2012_val_00033189.JPEG 4
ILSVRC2012_val_00033195.JPEG 1
ILSVRC2012_val_00033243.JPEG 5
ILSVRC2012_val_00033257.JPEG 4
ILSVRC2012_val_00033259.JPEG 4
ILSVRC2012_val_00033277.JPEG 5
ILSVRC2012_val_00033278.JPEG 0
ILSVRC2012_val_00033281.JPEG 4
ILSVRC2012_val_00033285.JPEG 0
ILSVRC2012_val_00033294.JPEG 6
ILSVRC2012_val_00033298.JPEG 5
ILSVRC2012_val_00033308.JPEG 0
ILSVRC2012_val_00033335.JPEG 5
ILSVRC2012_val_00033340.JPEG 4
ILSVRC2012_val_00033356.JPEG 6
ILSVRC2012_val_00033359.JPEG 8
ILSVRC2012_val_00033360.JPEG 8
ILSVRC2012_val_00033385.JPEG 5
ILSVRC2012_val_00033393.JPEG 4
ILSVRC2012_val_00033420.JPEG 1
ILSVRC2012_val_00033431.JPEG 4
ILSVRC2012_val_00033434.JPEG 4
ILSVRC2012_val_00033442.JPEG 3
ILSVRC2012_val_00033445.JPEG 3
ILSVRC2012_val_00033453.JPEG 6
ILSVRC2012_val_00033469.JPEG 4
ILSVRC2012_val_00033479.JPEG 4
ILSVRC2012_val_00033481.JPEG 6
ILSVRC2012_val_00033490.JPEG 1
ILSVRC2012_val_00033503.JPEG 4
ILSVRC2012_val_00033507.JPEG 6
ILSVRC2012_val_00033512.JPEG 7
ILSVRC2012_val_00033513.JPEG 5
ILSVRC2012_val_00033524.JPEG 8
ILSVRC2012_val_00033528.JPEG 5
ILSVRC2012_val_00033535.JPEG 6
ILSVRC2012_val_00033537.JPEG 5
ILSVRC2012_val_00033541.JPEG 6
ILSVRC2012_val_00033577.JPEG 0
ILSVRC2012_val_00033581.JPEG 0
ILSVRC2012_val_00033582.JPEG 1
ILSVRC2012_val_00033584.JPEG 6
ILSVRC2012_val_00033604.JPEG 4
ILSVRC2012_val_00033626.JPEG 0
ILSVRC2012_val_00033632.JPEG 8
ILSVRC2012_val_00033650.JPEG 5
ILSVRC2012_val_00033702.JPEG 2
ILSVRC2012_val_00033705.JPEG 8
ILSVRC2012_val_00033708.JPEG 4
ILSVRC2012_val_00033712.JPEG 7
ILSVRC2012_val_00033716.JPEG 4
ILSVRC2012_val_00033717.JPEG 5
ILSVRC2012_val_00033723.JPEG 3
ILSVRC2012_val_00033733.JPEG 4
ILSVRC2012_val_00033756.JPEG 4
ILSVRC2012_val_00033758.JPEG 0
ILSVRC2012_val_00033763.JPEG 0
ILSVRC2012_val_00033769.JPEG 2
ILSVRC2012_val_00033778.JPEG 5
ILSVRC2012_val_00033780.JPEG 5
ILSVRC2012_val_00033781.JPEG 8
ILSVRC2012_val_00033783.JPEG 4
ILSVRC2012_val_00033788.JPEG 8
ILSVRC2012_val_00033801.JPEG 6
ILSVRC2012_val_00033808.JPEG 7
ILSVRC2012_val_00033815.JPEG 4
ILSVRC2012_val_00033823.JPEG 4
ILSVRC2012_val_00033826.JPEG 8
ILSVRC2012_val_00033829.JPEG 4
ILSVRC2012_val_00033837.JPEG 1
ILSVRC2012_val_00033838.JPEG 2
ILSVRC2012_val_00033841.JPEG 5
ILSVRC2012_val_00033863.JPEG 2
ILSVRC2012_val_00033888.JPEG 4
ILSVRC2012_val_00033908.JPEG 6
ILSVRC2012_val_00033927.JPEG 5
ILSVRC2012_val_00033928.JPEG 5
ILSVRC2012_val_00033945.JPEG 4
ILSVRC2012_val_00033951.JPEG 5
ILSVRC2012_val_00033960.JPEG 2
ILSVRC2012_val_00033962.JPEG 4
ILSVRC2012_val_00033967.JPEG 5
ILSVRC2012_val_00033977.JPEG 4
ILSVRC2012_val_00033980.JPEG 8
ILSVRC2012_val_00034014.JPEG 8
ILSVRC2012_val_00034042.JPEG 6
ILSVRC2012_val_00034051.JPEG 6
ILSVRC2012_val_00034110.JPEG 0
ILSVRC2012_val_00034120.JPEG 6
ILSVRC2012_val_00034129.JPEG 4
ILSVRC2012_val_00034140.JPEG 6
ILSVRC2012_val_00034185.JPEG 8
ILSVRC2012_val_00034190.JPEG 8
ILSVRC2012_val_00034192.JPEG 8
ILSVRC2012_val_00034194.JPEG 4
ILSVRC2012_val_00034203.JPEG 8
ILSVRC2012_val_00034213.JPEG 8
ILSVRC2012_val_00034215.JPEG 5
ILSVRC2012_val_00034225.JPEG 6
ILSVRC2012_val_00034226.JPEG 2
ILSVRC2012_val_00034230.JPEG 5
ILSVRC2012_val_00034244.JPEG 1
ILSVRC2012_val_00034245.JPEG 8
ILSVRC2012_val_00034254.JPEG 1
ILSVRC2012_val_00034270.JPEG 8
ILSVRC2012_val_00034271.JPEG 5
ILSVRC2012_val_00034274.JPEG 8
ILSVRC2012_val_00034282.JPEG 4
ILSVRC2012_val_00034290.JPEG 2
ILSVRC2012_val_00034293.JPEG 5
ILSVRC2012_val_00034295.JPEG 5
ILSVRC2012_val_00034312.JPEG 6
ILSVRC2012_val_00034315.JPEG 4
ILSVRC2012_val_00034322.JPEG 5
ILSVRC2012_val_00034330.JPEG 4
ILSVRC2012_val_00034347.JPEG 4
ILSVRC2012_val_00034349.JPEG 4
ILSVRC2012_val_00034354.JPEG 6
ILSVRC2012_val_00034370.JPEG 8
ILSVRC2012_val_00034383.JPEG 2
ILSVRC2012_val_00034421.JPEG 1
ILSVRC2012_val_00034448.JPEG 7
ILSVRC2012_val_00034467.JPEG 5
ILSVRC2012_val_00034488.JPEG 6
ILSVRC2012_val_00034492.JPEG 4
ILSVRC2012_val_00034497.JPEG 8
ILSVRC2012_val_00034502.JPEG 8
ILSVRC2012_val_00034510.JPEG 4
ILSVRC2012_val_00034512.JPEG 4
ILSVRC2012_val_00034514.JPEG 0
ILSVRC2012_val_00034515.JPEG 4
ILSVRC2012_val_00034516.JPEG 0
ILSVRC2012_val_00034528.JPEG 6
ILSVRC2012_val_00034536.JPEG 4
ILSVRC2012_val_00034542.JPEG 2
ILSVRC2012_val_00034545.JPEG 6
ILSVRC2012_val_00034566.JPEG 8
ILSVRC2012_val_00034574.JPEG 0
ILSVRC2012_val_00034605.JPEG 7
ILSVRC2012_val_00034617.JPEG 0
ILSVRC2012_val_00034623.JPEG 6
ILSVRC2012_val_00034631.JPEG 4
ILSVRC2012_val_00034652.JPEG 4
ILSVRC2012_val_00034667.JPEG 0
ILSVRC2012_val_00034670.JPEG 7
ILSVRC2012_val_00034674.JPEG 3
ILSVRC2012_val_00034676.JPEG 1
ILSVRC2012_val_00034684.JPEG 7
ILSVRC2012_val_00034688.JPEG 8
ILSVRC2012_val_00034701.JPEG 0
ILSVRC2012_val_00034722.JPEG 8
ILSVRC2012_val_00034728.JPEG 3
ILSVRC2012_val_00034732.JPEG 0
ILSVRC2012_val_00034738.JPEG 8
ILSVRC2012_val_00034740.JPEG 5
ILSVRC2012_val_00034744.JPEG 0
ILSVRC2012_val_00034749.JPEG 4
ILSVRC2012_val_00034754.JPEG 5
ILSVRC2012_val_00034764.JPEG 8
ILSVRC2012_val_00034769.JPEG 8
ILSVRC2012_val_00034770.JPEG 3
ILSVRC2012_val_00034775.JPEG 8
ILSVRC2012_val_00034777.JPEG 5
ILSVRC2012_val_00034784.JPEG 4
ILSVRC2012_val_00034794.JPEG 3
ILSVRC2012_val_00034795.JPEG 3
ILSVRC2012_val_00034809.JPEG 4
ILSVRC2012_val_00034828.JPEG 0
ILSVRC2012_val_00034839.JPEG 8
ILSVRC2012_val_00034840.JPEG 3
ILSVRC2012_val_00034851.JPEG 0
ILSVRC2012_val_00034884.JPEG 0
ILSVRC2012_val_00034888.JPEG 5
ILSVRC2012_val_00034895.JPEG 8
ILSVRC2012_val_00034900.JPEG 8
ILSVRC2012_val_00034921.JPEG 8
ILSVRC2012_val_00034923.JPEG 8
ILSVRC2012_val_00034954.JPEG 8
ILSVRC2012_val_00034960.JPEG 3
ILSVRC2012_val_00034984.JPEG 4
ILSVRC2012_val_00034985.JPEG 5
ILSVRC2012_val_00034998.JPEG 6
ILSVRC2012_val_00035014.JPEG 8
ILSVRC2012_val_00035036.JPEG 0
ILSVRC2012_val_00035042.JPEG 5
ILSVRC2012_val_00035045.JPEG 5
ILSVRC2012_val_00035047.JPEG 4
ILSVRC2012_val_00035054.JPEG 4
ILSVRC2012_val_00035067.JPEG 8
ILSVRC2012_val_00035087.JPEG 8
ILSVRC2012_val_00035096.JPEG 4
ILSVRC2012_val_00035127.JPEG 4
ILSVRC2012_val_00035138.JPEG 6
ILSVRC2012_val_00035163.JPEG 1
ILSVRC2012_val_00035166.JPEG 5
ILSVRC2012_val_00035169.JPEG 7
ILSVRC2012_val_00035172.JPEG 1
ILSVRC2012_val_00035175.JPEG 8
ILSVRC2012_val_00035176.JPEG 6
ILSVRC2012_val_00035183.JPEG 4
ILSVRC2012_val_00035199.JPEG 8
ILSVRC2012_val_00035204.JPEG 5
ILSVRC2012_val_00035209.JPEG 7
ILSVRC2012_val_00035246.JPEG 6
ILSVRC2012_val_00035247.JPEG 8
ILSVRC2012_val_00035250.JPEG 4
ILSVRC2012_val_00035261.JPEG 8
ILSVRC2012_val_00035262.JPEG 8
ILSVRC2012_val_00035269.JPEG 7
ILSVRC2012_val_00035274.JPEG 4
ILSVRC2012_val_00035276.JPEG 6
ILSVRC2012_val_00035287.JPEG 4
ILSVRC2012_val_00035295.JPEG 8
ILSVRC2012_val_00035308.JPEG 8
ILSVRC2012_val_00035324.JPEG 8
ILSVRC2012_val_00035361.JPEG 7
ILSVRC2012_val_00035378.JPEG 0
ILSVRC2012_val_00035382.JPEG 5
ILSVRC2012_val_00035398.JPEG 0
ILSVRC2012_val_00035402.JPEG 5
ILSVRC2012_val_00035407.JPEG 6
ILSVRC2012_val_00035409.JPEG 8
ILSVRC2012_val_00035415.JPEG 6
ILSVRC2012_val_00035426.JPEG 4
ILSVRC2012_val_00035448.JPEG 5
ILSVRC2012_val_00035454.JPEG 5
ILSVRC2012_val_00035474.JPEG 4
ILSVRC2012_val_00035476.JPEG 4
ILSVRC2012_val_00035493.JPEG 5
ILSVRC2012_val_00035497.JPEG 8
ILSVRC2012_val_00035499.JPEG 4
ILSVRC2012_val_00035502.JPEG 4
ILSVRC2012_val_00035503.JPEG 8
ILSVRC2012_val_00035521.JPEG 4
ILSVRC2012_val_00035526.JPEG 8
ILSVRC2012_val_00035531.JPEG 5
ILSVRC2012_val_00035532.JPEG 1
ILSVRC2012_val_00035534.JPEG 8
ILSVRC2012_val_00035535.JPEG 2
ILSVRC2012_val_00035538.JPEG 0
ILSVRC2012_val_00035542.JPEG 4
ILSVRC2012_val_00035543.JPEG 5
ILSVRC2012_val_00035552.JPEG 0
ILSVRC2012_val_00035555.JPEG 4
ILSVRC2012_val_00035561.JPEG 5
ILSVRC2012_val_00035564.JPEG 5
ILSVRC2012_val_00035566.JPEG 1
ILSVRC2012_val_00035582.JPEG 8
ILSVRC2012_val_00035601.JPEG 4
ILSVRC2012_val_00035604.JPEG 0
ILSVRC2012_val_00035612.JPEG 5
ILSVRC2012_val_00035625.JPEG 4
ILSVRC2012_val_00035633.JPEG 0
ILSVRC2012_val_00035638.JPEG 4
ILSVRC2012_val_00035647.JPEG 4
ILSVRC2012_val_00035653.JPEG 5
ILSVRC2012_val_00035658.JPEG 2
ILSVRC2012_val_00035664.JPEG 3
ILSVRC2012_val_00035668.JPEG 5
ILSVRC2012_val_00035682.JPEG 5
ILSVRC2012_val_00035694.JPEG 8
ILSVRC2012_val_00035710.JPEG 8
ILSVRC2012_val_00035711.JPEG 7
ILSVRC2012_val_00035713.JPEG 8
ILSVRC2012_val_00035726.JPEG 4
ILSVRC2012_val_00035760.JPEG 5
ILSVRC2012_val_00035797.JPEG 8
ILSVRC2012_val_00035799.JPEG 5
ILSVRC2012_val_00035804.JPEG 4
ILSVRC2012_val_00035838.JPEG 8
ILSVRC2012_val_00035847.JPEG 0
ILSVRC2012_val_00035849.JPEG 5
ILSVRC2012_val_00035861.JPEG 5
ILSVRC2012_val_00035871.JPEG 6
ILSVRC2012_val_00035879.JPEG 5
ILSVRC2012_val_00035886.JPEG 5
ILSVRC2012_val_00035901.JPEG 5
ILSVRC2012_val_00035905.JPEG 3
ILSVRC2012_val_00035916.JPEG 4
ILSVRC2012_val_00035922.JPEG 4
ILSVRC2012_val_00035932.JPEG 8
ILSVRC2012_val_00035938.JPEG 4
ILSVRC2012_val_00035957.JPEG 6
ILSVRC2012_val_00035973.JPEG 0
ILSVRC2012_val_00035974.JPEG 4
ILSVRC2012_val_00035977.JPEG 5
ILSVRC2012_val_00035989.JPEG 4
ILSVRC2012_val_00036005.JPEG 8
ILSVRC2012_val_00036016.JPEG 6
ILSVRC2012_val_00036023.JPEG 0
ILSVRC2012_val_00036026.JPEG 6
ILSVRC2012_val_00036030.JPEG 6
ILSVRC2012_val_00036040.JPEG 4
ILSVRC2012_val_00036044.JPEG 4
ILSVRC2012_val_00036065.JPEG 2
ILSVRC2012_val_00036066.JPEG 2
ILSVRC2012_val_00036069.JPEG 0
ILSVRC2012_val_00036079.JPEG 5
ILSVRC2012_val_00036080.JPEG 5
ILSVRC2012_val_00036100.JPEG 8
ILSVRC2012_val_00036102.JPEG 2
ILSVRC2012_val_00036126.JPEG 4
ILSVRC2012_val_00036127.JPEG 6
ILSVRC2012_val_00036132.JPEG 4
ILSVRC2012_val_00036154.JPEG 5
ILSVRC2012_val_00036158.JPEG 8
ILSVRC2012_val_00036162.JPEG 4
ILSVRC2012_val_00036169.JPEG 4
ILSVRC2012_val_00036173.JPEG 8
ILSVRC2012_val_00036179.JPEG 4
ILSVRC2012_val_00036186.JPEG 8
ILSVRC2012_val_00036195.JPEG 3
ILSVRC2012_val_00036196.JPEG 8
ILSVRC2012_val_00036202.JPEG 3
ILSVRC2012_val_00036212.JPEG 7
ILSVRC2012_val_00036219.JPEG 5
ILSVRC2012_val_00036225.JPEG 4
ILSVRC2012_val_00036227.JPEG 4
ILSVRC2012_val_00036238.JPEG 5
ILSVRC2012_val_00036243.JPEG 5
ILSVRC2012_val_00036245.JPEG 6
ILSVRC2012_val_00036251.JPEG 8
ILSVRC2012_val_00036265.JPEG 8
ILSVRC2012_val_00036268.JPEG 1
ILSVRC2012_val_00036271.JPEG 3
ILSVRC2012_val_00036287.JPEG 4
ILSVRC2012_val_00036290.JPEG 1
ILSVRC2012_val_00036293.JPEG 2
ILSVRC2012_val_00036295.JPEG 8
ILSVRC2012_val_00036310.JPEG 8
ILSVRC2012_val_00036333.JPEG 0
ILSVRC2012_val_00036337.JPEG 4
ILSVRC2012_val_00036341.JPEG 6
ILSVRC2012_val_00036345.JPEG 3
ILSVRC2012_val_00036354.JPEG 4
ILSVRC2012_val_00036361.JPEG 4
ILSVRC2012_val_00036365.JPEG 5
ILSVRC2012_val_00036397.JPEG 5
ILSVRC2012_val_00036405.JPEG 8
ILSVRC2012_val_00036417.JPEG 8
ILSVRC2012_val_00036423.JPEG 4
ILSVRC2012_val_00036434.JPEG 8
ILSVRC2012_val_00036471.JPEG 5
ILSVRC2012_val_00036472.JPEG 6
ILSVRC2012_val_00036484.JPEG 6
ILSVRC2012_val_00036486.JPEG 8
ILSVRC2012_val_00036489.JPEG 5
ILSVRC2012_val_00036526.JPEG 1
ILSVRC2012_val_00036528.JPEG 5
ILSVRC2012_val_00036535.JPEG 6
ILSVRC2012_val_00036540.JPEG 4
ILSVRC2012_val_00036542.JPEG 5
ILSVRC2012_val_00036548.JPEG 5
ILSVRC2012_val_00036552.JPEG 4
ILSVRC2012_val_00036555.JPEG 8
ILSVRC2012_val_00036557.JPEG 6
ILSVRC2012_val_00036562.JPEG 5
ILSVRC2012_val_00036567.JPEG 5
ILSVRC2012_val_00036573.JPEG 4
ILSVRC2012_val_00036578.JPEG 8
ILSVRC2012_val_00036612.JPEG 5
ILSVRC2012_val_00036613.JPEG 8
ILSVRC2012_val_00036631.JPEG 8
ILSVRC2012_val_00036650.JPEG 3
ILSVRC2012_val_00036652.JPEG 4
ILSVRC2012_val_00036661.JPEG 1
ILSVRC2012_val_00036675.JPEG 4
ILSVRC2012_val_00036693.JPEG 8
ILSVRC2012_val_00036702.JPEG 4
ILSVRC2012_val_00036704.JPEG 4
ILSVRC2012_val_00036709.JPEG 0
ILSVRC2012_val_00036713.JPEG 4
ILSVRC2012_val_00036720.JPEG 5
ILSVRC2012_val_00036722.JPEG 2
ILSVRC2012_val_00036729.JPEG 8
ILSVRC2012_val_00036743.JPEG 6
ILSVRC2012_val_00036744.JPEG 4
ILSVRC2012_val_00036761.JPEG 8
ILSVRC2012_val_00036767.JPEG 5
ILSVRC2012_val_00036769.JPEG 6
ILSVRC2012_val_00036784.JPEG 8
ILSVRC2012_val_00036815.JPEG 3
ILSVRC2012_val_00036823.JPEG 5
ILSVRC2012_val_00036832.JPEG 8
ILSVRC2012_val_00036834.JPEG 6
ILSVRC2012_val_00036835.JPEG 4
ILSVRC2012_val_00036838.JPEG 5
ILSVRC2012_val_00036845.JPEG 4
ILSVRC2012_val_00036850.JPEG 2
ILSVRC2012_val_00036851.JPEG 5
ILSVRC2012_val_00036865.JPEG 0
ILSVRC2012_val_00036874.JPEG 4
ILSVRC2012_val_00036879.JPEG 4
ILSVRC2012_val_00036880.JPEG 8
ILSVRC2012_val_00036911.JPEG 6
ILSVRC2012_val_00036915.JPEG 2
ILSVRC2012_val_00036942.JPEG 2
ILSVRC2012_val_00036944.JPEG 3
ILSVRC2012_val_00036953.JPEG 5
ILSVRC2012_val_00036958.JPEG 8
ILSVRC2012_val_00036959.JPEG 0
ILSVRC2012_val_00036961.JPEG 1
ILSVRC2012_val_00036963.JPEG 3
ILSVRC2012_val_00036968.JPEG 4
ILSVRC2012_val_00036969.JPEG 4
ILSVRC2012_val_00036972.JPEG 4
ILSVRC2012_val_00036977.JPEG 0
ILSVRC2012_val_00036988.JPEG 4
ILSVRC2012_val_00036990.JPEG 8
ILSVRC2012_val_00036994.JPEG 5
ILSVRC2012_val_00037002.JPEG 4
ILSVRC2012_val_00037024.JPEG 4
ILSVRC2012_val_00037031.JPEG 4
ILSVRC2012_val_00037042.JPEG 8
ILSVRC2012_val_00037084.JPEG 5
ILSVRC2012_val_00037090.JPEG 8
ILSVRC2012_val_00037107.JPEG 5
ILSVRC2012_val_00037115.JPEG 5
ILSVRC2012_val_00037119.JPEG 4
ILSVRC2012_val_00037126.JPEG 8
ILSVRC2012_val_00037145.JPEG 4
ILSVRC2012_val_00037146.JPEG 6
ILSVRC2012_val_00037149.JPEG 4
ILSVRC2012_val_00037154.JPEG 3
ILSVRC2012_val_00037156.JPEG 5
ILSVRC2012_val_00037171.JPEG 5
ILSVRC2012_val_00037188.JPEG 4
ILSVRC2012_val_00037198.JPEG 8
ILSVRC2012_val_00037212.JPEG 5
ILSVRC2012_val_00037219.JPEG 5
ILSVRC2012_val_00037221.JPEG 7
ILSVRC2012_val_00037228.JPEG 5
ILSVRC2012_val_00037240.JPEG 5
ILSVRC2012_val_00037244.JPEG 4
ILSVRC2012_val_00037252.JPEG 0
ILSVRC2012_val_00037269.JPEG 8
ILSVRC2012_val_00037276.JPEG 5
ILSVRC2012_val_00037296.JPEG 5
ILSVRC2012_val_00037329.JPEG 6
ILSVRC2012_val_00037337.JPEG 4
ILSVRC2012_val_00037339.JPEG 0
ILSVRC2012_val_00037356.JPEG 8
ILSVRC2012_val_00037371.JPEG 6
ILSVRC2012_val_00037397.JPEG 4
ILSVRC2012_val_00037407.JPEG 6
ILSVRC2012_val_00037408.JPEG 4
ILSVRC2012_val_00037413.JPEG 7
ILSVRC2012_val_00037453.JPEG 8
ILSVRC2012_val_00037467.JPEG 5
ILSVRC2012_val_00037471.JPEG 4
ILSVRC2012_val_00037483.JPEG 8
ILSVRC2012_val_00037489.JPEG 5
ILSVRC2012_val_00037491.JPEG 8
ILSVRC2012_val_00037500.JPEG 4
ILSVRC2012_val_00037505.JPEG 8
ILSVRC2012_val_00037524.JPEG 4
ILSVRC2012_val_00037535.JPEG 5
ILSVRC2012_val_00037558.JPEG 6
ILSVRC2012_val_00037560.JPEG 3
ILSVRC2012_val_00037564.JPEG 5
ILSVRC2012_val_00037565.JPEG 5
ILSVRC2012_val_00037571.JPEG 8
ILSVRC2012_val_00037572.JPEG 4
ILSVRC2012_val_00037589.JPEG 8
ILSVRC2012_val_00037595.JPEG 0
ILSVRC2012_val_00037610.JPEG 8
ILSVRC2012_val_00037636.JPEG 8
ILSVRC2012_val_00037653.JPEG 3
ILSVRC2012_val_00037672.JPEG 4
ILSVRC2012_val_00037684.JPEG 7
ILSVRC2012_val_00037692.JPEG 6
ILSVRC2012_val_00037693.JPEG 5
ILSVRC2012_val_00037710.JPEG 4
ILSVRC2012_val_00037713.JPEG 8
ILSVRC2012_val_00037733.JPEG 1
ILSVRC2012_val_00037738.JPEG 5
ILSVRC2012_val_00037739.JPEG 3
ILSVRC2012_val_00037767.JPEG 0
ILSVRC2012_val_00037768.JPEG 8
ILSVRC2012_val_00037773.JPEG 8
ILSVRC2012_val_00037781.JPEG 5
ILSVRC2012_val_00037790.JPEG 5
ILSVRC2012_val_00037807.JPEG 8
ILSVRC2012_val_00037812.JPEG 3
ILSVRC2012_val_00037832.JPEG 8
ILSVRC2012_val_00037852.JPEG 4
ILSVRC2012_val_00037853.JPEG 0
ILSVRC2012_val_00037885.JPEG 0
ILSVRC2012_val_00037889.JPEG 8
ILSVRC2012_val_00037891.JPEG 0
ILSVRC2012_val_00037892.JPEG 4
ILSVRC2012_val_00037893.JPEG 8
ILSVRC2012_val_00037894.JPEG 3
ILSVRC2012_val_00037930.JPEG 8
ILSVRC2012_val_00037948.JPEG 6
ILSVRC2012_val_00037958.JPEG 8
ILSVRC2012_val_00037973.JPEG 7
ILSVRC2012_val_00037987.JPEG 8
ILSVRC2012_val_00037993.JPEG 8
ILSVRC2012_val_00037997.JPEG 1
ILSVRC2012_val_00038010.JPEG 8
ILSVRC2012_val_00038020.JPEG 6
ILSVRC2012_val_00038023.JPEG 4
ILSVRC2012_val_00038024.JPEG 5
ILSVRC2012_val_00038033.JPEG 6
ILSVRC2012_val_00038035.JPEG 8
ILSVRC2012_val_00038037.JPEG 5
ILSVRC2012_val_00038047.JPEG 5
ILSVRC2012_val_00038052.JPEG 5
ILSVRC2012_val_00038085.JPEG 3
ILSVRC2012_val_00038087.JPEG 5
ILSVRC2012_val_00038090.JPEG 8
ILSVRC2012_val_00038122.JPEG 0
ILSVRC2012_val_00038126.JPEG 4
ILSVRC2012_val_00038129.JPEG 8
ILSVRC2012_val_00038140.JPEG 3
ILSVRC2012_val_00038142.JPEG 8
ILSVRC2012_val_00038168.JPEG 1
ILSVRC2012_val_00038169.JPEG 4
ILSVRC2012_val_00038170.JPEG 8
ILSVRC2012_val_00038181.JPEG 8
ILSVRC2012_val_00038182.JPEG 8
ILSVRC2012_val_00038201.JPEG 0
ILSVRC2012_val_00038203.JPEG 5
ILSVRC2012_val_00038230.JPEG 3
ILSVRC2012_val_00038232.JPEG 7
ILSVRC2012_val_00038238.JPEG 5
ILSVRC2012_val_00038262.JPEG 8
ILSVRC2012_val_00038288.JPEG 4
ILSVRC2012_val_00038294.JPEG 0
ILSVRC2012_val_00038309.JPEG 7
ILSVRC2012_val_00038324.JPEG 4
ILSVRC2012_val_00038354.JPEG 8
ILSVRC2012_val_00038403.JPEG 0
ILSVRC2012_val_00038418.JPEG 4
ILSVRC2012_val_00038426.JPEG 4
ILSVRC2012_val_00038443.JPEG 4
ILSVRC2012_val_00038446.JPEG 2
ILSVRC2012_val_00038463.JPEG 8
ILSVRC2012_val_00038475.JPEG 6
ILSVRC2012_val_00038476.JPEG 4
ILSVRC2012_val_00038505.JPEG 4
ILSVRC2012_val_00038519.JPEG 8
ILSVRC2012_val_00038526.JPEG 7
ILSVRC2012_val_00038527.JPEG 3
ILSVRC2012_val_00038534.JPEG 7
ILSVRC2012_val_00038537.JPEG 8
ILSVRC2012_val_00038538.JPEG 5
ILSVRC2012_val_00038549.JPEG 3
ILSVRC2012_val_00038553.JPEG 4
ILSVRC2012_val_00038563.JPEG 4
ILSVRC2012_val_00038566.JPEG 5
ILSVRC2012_val_00038580.JPEG 0
ILSVRC2012_val_00038583.JPEG 0
ILSVRC2012_val_00038601.JPEG 5
ILSVRC2012_val_00038606.JPEG 7
ILSVRC2012_val_00038628.JPEG 3
ILSVRC2012_val_00038638.JPEG 4
ILSVRC2012_val_00038639.JPEG 7
ILSVRC2012_val_00038661.JPEG 1
ILSVRC2012_val_00038662.JPEG 8
ILSVRC2012_val_00038664.JPEG 4
ILSVRC2012_val_00038672.JPEG 1
ILSVRC2012_val_00038681.JPEG 4
ILSVRC2012_val_00038683.JPEG 1
ILSVRC2012_val_00038685.JPEG 4
ILSVRC2012_val_00038694.JPEG 7
ILSVRC2012_val_00038696.JPEG 5
ILSVRC2012_val_00038697.JPEG 8
ILSVRC2012_val_00038716.JPEG 8
ILSVRC2012_val_00038728.JPEG 8
ILSVRC2012_val_00038736.JPEG 4
ILSVRC2012_val_00038764.JPEG 6
ILSVRC2012_val_00038765.JPEG 8
ILSVRC2012_val_00038766.JPEG 4
ILSVRC2012_val_00038769.JPEG 5
ILSVRC2012_val_00038773.JPEG 8
ILSVRC2012_val_00038774.JPEG 8
ILSVRC2012_val_00038816.JPEG 5
ILSVRC2012_val_00038818.JPEG 8
ILSVRC2012_val_00038828.JPEG 0
ILSVRC2012_val_00038832.JPEG 8
ILSVRC2012_val_00038839.JPEG 5
ILSVRC2012_val_00038867.JPEG 0
ILSVRC2012_val_00038869.JPEG 5
ILSVRC2012_val_00038873.JPEG 5
ILSVRC2012_val_00038878.JPEG 3
ILSVRC2012_val_00038883.JPEG 5
ILSVRC2012_val_00038902.JPEG 5
ILSVRC2012_val_00038903.JPEG 8
ILSVRC2012_val_00038910.JPEG 5
ILSVRC2012_val_00038928.JPEG 6
ILSVRC2012_val_00038929.JPEG 8
ILSVRC2012_val_00038959.JPEG 2
ILSVRC2012_val_00038973.JPEG 6
ILSVRC2012_val_00038976.JPEG 1
ILSVRC2012_val_00038989.JPEG 0
ILSVRC2012_val_00039021.JPEG 4
ILSVRC2012_val_00039024.JPEG 3
ILSVRC2012_val_00039027.JPEG 0
ILSVRC2012_val_00039032.JPEG 8
ILSVRC2012_val_00039057.JPEG 0
ILSVRC2012_val_00039084.JPEG 1
ILSVRC2012_val_00039092.JPEG 8
ILSVRC2012_val_00039105.JPEG 5
ILSVRC2012_val_00039113.JPEG 4
ILSVRC2012_val_00039121.JPEG 5
ILSVRC2012_val_00039130.JPEG 8
ILSVRC2012_val_00039138.JPEG 7
ILSVRC2012_val_00039144.JPEG 0
ILSVRC2012_val_00039156.JPEG 5
ILSVRC2012_val_00039157.JPEG 8
ILSVRC2012_val_00039189.JPEG 8
ILSVRC2012_val_00039201.JPEG 8
ILSVRC2012_val_00039212.JPEG 0
ILSVRC2012_val_00039216.JPEG 6
ILSVRC2012_val_00039225.JPEG 5
ILSVRC2012_val_00039252.JPEG 8
ILSVRC2012_val_00039253.JPEG 5
ILSVRC2012_val_00039257.JPEG 4
ILSVRC2012_val_00039261.JPEG 4
ILSVRC2012_val_00039266.JPEG 4
ILSVRC2012_val_00039267.JPEG 8
ILSVRC2012_val_00039281.JPEG 4
ILSVRC2012_val_00039295.JPEG 5
ILSVRC2012_val_00039299.JPEG 4
ILSVRC2012_val_00039302.JPEG 5
ILSVRC2012_val_00039332.JPEG 8
ILSVRC2012_val_00039346.JPEG 5
ILSVRC2012_val_00039365.JPEG 8
ILSVRC2012_val_00039381.JPEG 0
ILSVRC2012_val_00039390.JPEG 1
ILSVRC2012_val_00039406.JPEG 8
ILSVRC2012_val_00039412.JPEG 4
ILSVRC2012_val_00039426.JPEG 4
ILSVRC2012_val_00039441.JPEG 3
ILSVRC2012_val_00039452.JPEG 0
ILSVRC2012_val_00039459.JPEG 5
ILSVRC2012_val_00039463.JPEG 4
ILSVRC2012_val_00039465.JPEG 4
ILSVRC2012_val_00039478.JPEG 2
ILSVRC2012_val_00039531.JPEG 4
ILSVRC2012_val_00039536.JPEG 3
ILSVRC2012_val_00039545.JPEG 5
ILSVRC2012_val_00039550.JPEG 8
ILSVRC2012_val_00039552.JPEG 5
ILSVRC2012_val_00039553.JPEG 1
ILSVRC2012_val_00039563.JPEG 5
ILSVRC2012_val_00039580.JPEG 1
ILSVRC2012_val_00039585.JPEG 0
ILSVRC2012_val_00039589.JPEG 8
ILSVRC2012_val_00039612.JPEG 8
ILSVRC2012_val_00039621.JPEG 1
ILSVRC2012_val_00039624.JPEG 5
ILSVRC2012_val_00039636.JPEG 5
ILSVRC2012_val_00039638.JPEG 0
ILSVRC2012_val_00039645.JPEG 5
ILSVRC2012_val_00039662.JPEG 0
ILSVRC2012_val_00039668.JPEG 0
ILSVRC2012_val_00039673.JPEG 8
ILSVRC2012_val_00039700.JPEG 0
ILSVRC2012_val_00039711.JPEG 0
ILSVRC2012_val_00039712.JPEG 8
ILSVRC2012_val_00039719.JPEG 0
ILSVRC2012_val_00039724.JPEG 4
ILSVRC2012_val_00039744.JPEG 8
ILSVRC2012_val_00039767.JPEG 5
ILSVRC2012_val_00039768.JPEG 6
ILSVRC2012_val_00039786.JPEG 5
ILSVRC2012_val_00039793.JPEG 6
ILSVRC2012_val_00039807.JPEG 0
ILSVRC2012_val_00039808.JPEG 5
ILSVRC2012_val_00039825.JPEG 4
ILSVRC2012_val_00039838.JPEG 5
ILSVRC2012_val_00039839.JPEG 6
ILSVRC2012_val_00039843.JPEG 8
ILSVRC2012_val_00039850.JPEG 0
ILSVRC2012_val_00039863.JPEG 0
ILSVRC2012_val_00039866.JPEG 5
ILSVRC2012_val_00039870.JPEG 0
ILSVRC2012_val_00039877.JPEG 1
ILSVRC2012_val_00039883.JPEG 4
ILSVRC2012_val_00039898.JPEG 8
ILSVRC2012_val_00039907.JPEG 4
ILSVRC2012_val_00039925.JPEG 5
ILSVRC2012_val_00039931.JPEG 1
ILSVRC2012_val_00039948.JPEG 8
ILSVRC2012_val_00039951.JPEG 0
ILSVRC2012_val_00039953.JPEG 6
ILSVRC2012_val_00039957.JPEG 4
ILSVRC2012_val_00039964.JPEG 4
ILSVRC2012_val_00039978.JPEG 6
ILSVRC2012_val_00039979.JPEG 1
ILSVRC2012_val_00039988.JPEG 4
ILSVRC2012_val_00039996.JPEG 2
ILSVRC2012_val_00040000.JPEG 4
ILSVRC2012_val_00040002.JPEG 4
ILSVRC2012_val_00040008.JPEG 5
ILSVRC2012_val_00040014.JPEG 4
ILSVRC2012_val_00040018.JPEG 0
ILSVRC2012_val_00040025.JPEG 4
ILSVRC2012_val_00040044.JPEG 8
ILSVRC2012_val_00040050.JPEG 6
ILSVRC2012_val_00040051.JPEG 4
ILSVRC2012_val_00040056.JPEG 4
ILSVRC2012_val_00040072.JPEG 4
ILSVRC2012_val_00040079.JPEG 6
ILSVRC2012_val_00040103.JPEG 4
ILSVRC2012_val_00040128.JPEG 5
ILSVRC2012_val_00040129.JPEG 4
ILSVRC2012_val_00040132.JPEG 8
ILSVRC2012_val_00040147.JPEG 5
ILSVRC2012_val_00040156.JPEG 8
ILSVRC2012_val_00040161.JPEG 8
ILSVRC2012_val_00040167.JPEG 5
ILSVRC2012_val_00040168.JPEG 4
ILSVRC2012_val_00040183.JPEG 4
ILSVRC2012_val_00040190.JPEG 6
ILSVRC2012_val_00040192.JPEG 1
ILSVRC2012_val_00040203.JPEG 4
ILSVRC2012_val_00040209.JPEG 4
ILSVRC2012_val_00040216.JPEG 5
ILSVRC2012_val_00040223.JPEG 7
ILSVRC2012_val_00040231.JPEG 3
ILSVRC2012_val_00040232.JPEG 5
ILSVRC2012_val_00040238.JPEG 1
ILSVRC2012_val_00040239.JPEG 8
ILSVRC2012_val_00040245.JPEG 5
ILSVRC2012_val_00040251.JPEG 1
ILSVRC2012_val_00040261.JPEG 4
ILSVRC2012_val_00040264.JPEG 5
ILSVRC2012_val_00040266.JPEG 4
ILSVRC2012_val_00040267.JPEG 8
ILSVRC2012_val_00040269.JPEG 5
ILSVRC2012_val_00040278.JPEG 8
ILSVRC2012_val_00040279.JPEG 6
ILSVRC2012_val_00040287.JPEG 3
ILSVRC2012_val_00040289.JPEG 5
ILSVRC2012_val_00040291.JPEG 0
ILSVRC2012_val_00040301.JPEG 3
ILSVRC2012_val_00040308.JPEG 0
ILSVRC2012_val_00040314.JPEG 3
ILSVRC2012_val_00040334.JPEG 4
ILSVRC2012_val_00040348.JPEG 8
ILSVRC2012_val_00040357.JPEG 4
ILSVRC2012_val_00040359.JPEG 4
ILSVRC2012_val_00040397.JPEG 8
ILSVRC2012_val_00040410.JPEG 0
ILSVRC2012_val_00040420.JPEG 2
ILSVRC2012_val_00040440.JPEG 6
ILSVRC2012_val_00040451.JPEG 8
ILSVRC2012_val_00040463.JPEG 0
ILSVRC2012_val_00040484.JPEG 7
ILSVRC2012_val_00040513.JPEG 4
ILSVRC2012_val_00040524.JPEG 4
ILSVRC2012_val_00040533.JPEG 8
ILSVRC2012_val_00040556.JPEG 0
ILSVRC2012_val_00040595.JPEG 5
ILSVRC2012_val_00040600.JPEG 1
ILSVRC2012_val_00040611.JPEG 1
ILSVRC2012_val_00040638.JPEG 5
ILSVRC2012_val_00040653.JPEG 6
ILSVRC2012_val_00040656.JPEG 4
ILSVRC2012_val_00040701.JPEG 4
ILSVRC2012_val_00040713.JPEG 0
ILSVRC2012_val_00040723.JPEG 5
ILSVRC2012_val_00040725.JPEG 0
ILSVRC2012_val_00040726.JPEG 6
ILSVRC2012_val_00040730.JPEG 5
ILSVRC2012_val_00040745.JPEG 1
ILSVRC2012_val_00040752.JPEG 5
ILSVRC2012_val_00040762.JPEG 5
ILSVRC2012_val_00040764.JPEG 7
ILSVRC2012_val_00040765.JPEG 6
ILSVRC2012_val_00040771.JPEG 3
ILSVRC2012_val_00040776.JPEG 3
ILSVRC2012_val_00040778.JPEG 8
ILSVRC2012_val_00040780.JPEG 1
ILSVRC2012_val_00040787.JPEG 3
ILSVRC2012_val_00040789.JPEG 7
ILSVRC2012_val_00040794.JPEG 5
ILSVRC2012_val_00040798.JPEG 6
ILSVRC2012_val_00040803.JPEG 4
ILSVRC2012_val_00040805.JPEG 8
ILSVRC2012_val_00040811.JPEG 4
ILSVRC2012_val_00040839.JPEG 5
ILSVRC2012_val_00040846.JPEG 4
ILSVRC2012_val_00040848.JPEG 4
ILSVRC2012_val_00040849.JPEG 4
ILSVRC2012_val_00040852.JPEG 5
ILSVRC2012_val_00040854.JPEG 1
ILSVRC2012_val_00040859.JPEG 4
ILSVRC2012_val_00040865.JPEG 5
ILSVRC2012_val_00040881.JPEG 6
ILSVRC2012_val_00040897.JPEG 4
ILSVRC2012_val_00040899.JPEG 4
ILSVRC2012_val_00040914.JPEG 8
ILSVRC2012_val_00040915.JPEG 0
ILSVRC2012_val_00040926.JPEG 0
ILSVRC2012_val_00040944.JPEG 8
ILSVRC2012_val_00040980.JPEG 8
ILSVRC2012_val_00040983.JPEG 5
ILSVRC2012_val_00040996.JPEG 8
ILSVRC2012_val_00041011.JPEG 8
ILSVRC2012_val_00041017.JPEG 3
ILSVRC2012_val_00041021.JPEG 4
ILSVRC2012_val_00041028.JPEG 4
ILSVRC2012_val_00041041.JPEG 4
ILSVRC2012_val_00041046.JPEG 5
ILSVRC2012_val_00041084.JPEG 8
ILSVRC2012_val_00041092.JPEG 0
ILSVRC2012_val_00041117.JPEG 8
ILSVRC2012_val_00041118.JPEG 0
ILSVRC2012_val_00041120.JPEG 5
ILSVRC2012_val_00041133.JPEG 0
ILSVRC2012_val_00041155.JPEG 5
ILSVRC2012_val_00041180.JPEG 5
ILSVRC2012_val_00041184.JPEG 5
ILSVRC2012_val_00041190.JPEG 8
ILSVRC2012_val_00041197.JPEG 4
ILSVRC2012_val_00041200.JPEG 4
ILSVRC2012_val_00041211.JPEG 6
ILSVRC2012_val_00041221.JPEG 6
ILSVRC2012_val_00041232.JPEG 5
ILSVRC2012_val_00041245.JPEG 5
ILSVRC2012_val_00041250.JPEG 8
ILSVRC2012_val_00041261.JPEG 8
ILSVRC2012_val_00041277.JPEG 6
ILSVRC2012_val_00041279.JPEG 2
ILSVRC2012_val_00041288.JPEG 4
ILSVRC2012_val_00041294.JPEG 5
ILSVRC2012_val_00041305.JPEG 0
ILSVRC2012_val_00041329.JPEG 4
ILSVRC2012_val_00041344.JPEG 6
ILSVRC2012_val_00041347.JPEG 1
ILSVRC2012_val_00041356.JPEG 0
ILSVRC2012_val_00041361.JPEG 4
ILSVRC2012_val_00041364.JPEG 0
ILSVRC2012_val_00041375.JPEG 4
ILSVRC2012_val_00041381.JPEG 8
ILSVRC2012_val_00041427.JPEG 1
ILSVRC2012_val_00041431.JPEG 8
ILSVRC2012_val_00041477.JPEG 5
ILSVRC2012_val_00041498.JPEG 4
ILSVRC2012_val_00041501.JPEG 5
ILSVRC2012_val_00041506.JPEG 8
ILSVRC2012_val_00041511.JPEG 6
ILSVRC2012_val_00041528.JPEG 8
ILSVRC2012_val_00041556.JPEG 4
ILSVRC2012_val_00041561.JPEG 6
ILSVRC2012_val_00041570.JPEG 1
ILSVRC2012_val_00041577.JPEG 4
ILSVRC2012_val_00041579.JPEG 1
ILSVRC2012_val_00041580.JPEG 0
ILSVRC2012_val_00041596.JPEG 8
ILSVRC2012_val_00041606.JPEG 0
ILSVRC2012_val_00041607.JPEG 5
ILSVRC2012_val_00041621.JPEG 4
ILSVRC2012_val_00041627.JPEG 6
ILSVRC2012_val_00041641.JPEG 3
ILSVRC2012_val_00041697.JPEG 4
ILSVRC2012_val_00041704.JPEG 5
ILSVRC2012_val_00041713.JPEG 3
ILSVRC2012_val_00041728.JPEG 8
ILSVRC2012_val_00041739.JPEG 0
ILSVRC2012_val_00041746.JPEG 0
ILSVRC2012_val_00041749.JPEG 5
ILSVRC2012_val_00041756.JPEG 5
ILSVRC2012_val_00041764.JPEG 5
ILSVRC2012_val_00041766.JPEG 8
ILSVRC2012_val_00041768.JPEG 6
ILSVRC2012_val_00041786.JPEG 5
ILSVRC2012_val_00041832.JPEG 4
ILSVRC2012_val_00041838.JPEG 4
ILSVRC2012_val_00041845.JPEG 4
ILSVRC2012_val_00041848.JPEG 0
ILSVRC2012_val_00041850.JPEG 4
ILSVRC2012_val_00041851.JPEG 8
ILSVRC2012_val_00041861.JPEG 5
ILSVRC2012_val_00041864.JPEG 4
ILSVRC2012_val_00041867.JPEG 4
ILSVRC2012_val_00041871.JPEG 8
ILSVRC2012_val_00041877.JPEG 1
ILSVRC2012_val_00041909.JPEG 4
ILSVRC2012_val_00041919.JPEG 2
ILSVRC2012_val_00041950.JPEG 8
ILSVRC2012_val_00041960.JPEG 4
ILSVRC2012_val_00041982.JPEG 4
ILSVRC2012_val_00041983.JPEG 4
ILSVRC2012_val_00041998.JPEG 0
ILSVRC2012_val_00042009.JPEG 6
ILSVRC2012_val_00042010.JPEG 8
ILSVRC2012_val_00042015.JPEG 8
ILSVRC2012_val_00042020.JPEG 6
ILSVRC2012_val_00042021.JPEG 4
ILSVRC2012_val_00042023.JPEG 3
ILSVRC2012_val_00042024.JPEG 5
ILSVRC2012_val_00042038.JPEG 4
ILSVRC2012_val_00042045.JPEG 5
ILSVRC2012_val_00042046.JPEG 5
ILSVRC2012_val_00042049.JPEG 3
ILSVRC2012_val_00042058.JPEG 6
ILSVRC2012_val_00042059.JPEG 5
ILSVRC2012_val_00042068.JPEG 5
ILSVRC2012_val_00042071.JPEG 4
ILSVRC2012_val_00042073.JPEG 3
ILSVRC2012_val_00042076.JPEG 8
ILSVRC2012_val_00042086.JPEG 5
ILSVRC2012_val_00042103.JPEG 5
ILSVRC2012_val_00042126.JPEG 6
ILSVRC2012_val_00042127.JPEG 8
ILSVRC2012_val_00042128.JPEG 4
ILSVRC2012_val_00042159.JPEG 7
ILSVRC2012_val_00042165.JPEG 5
ILSVRC2012_val_00042180.JPEG 8
ILSVRC2012_val_00042186.JPEG 8
ILSVRC2012_val_00042210.JPEG 0
ILSVRC2012_val_00042213.JPEG 0
ILSVRC2012_val_00042216.JPEG 3
ILSVRC2012_val_00042223.JPEG 8
ILSVRC2012_val_00042226.JPEG 4
ILSVRC2012_val_00042232.JPEG 1
ILSVRC2012_val_00042233.JPEG 0
ILSVRC2012_val_00042242.JPEG 6
ILSVRC2012_val_00042251.JPEG 8
ILSVRC2012_val_00042278.JPEG 5
ILSVRC2012_val_00042280.JPEG 5
ILSVRC2012_val_00042296.JPEG 4
ILSVRC2012_val_00042299.JPEG 8
ILSVRC2012_val_00042307.JPEG 6
ILSVRC2012_val_00042310.JPEG 4
ILSVRC2012_val_00042328.JPEG 3
ILSVRC2012_val_00042342.JPEG 8
ILSVRC2012_val_00042405.JPEG 8
ILSVRC2012_val_00042433.JPEG 8
ILSVRC2012_val_00042438.JPEG 8
ILSVRC2012_val_00042480.JPEG 4
ILSVRC2012_val_00042509.JPEG 4
ILSVRC2012_val_00042516.JPEG 5
ILSVRC2012_val_00042541.JPEG 4
ILSVRC2012_val_00042544.JPEG 6
ILSVRC2012_val_00042553.JPEG 7
ILSVRC2012_val_00042557.JPEG 8
ILSVRC2012_val_00042564.JPEG 4
ILSVRC2012_val_00042565.JPEG 0
ILSVRC2012_val_00042567.JPEG 7
ILSVRC2012_val_00042586.JPEG 4
ILSVRC2012_val_00042595.JPEG 5
ILSVRC2012_val_00042610.JPEG 8
ILSVRC2012_val_00042624.JPEG 8
ILSVRC2012_val_00042628.JPEG 0
ILSVRC2012_val_00042637.JPEG 5
ILSVRC2012_val_00042664.JPEG 3
ILSVRC2012_val_00042665.JPEG 4
ILSVRC2012_val_00042679.JPEG 4
ILSVRC2012_val_00042700.JPEG 8
ILSVRC2012_val_00042708.JPEG 5
ILSVRC2012_val_00042719.JPEG 5
ILSVRC2012_val_00042796.JPEG 8
ILSVRC2012_val_00042803.JPEG 1
ILSVRC2012_val_00042811.JPEG 8
ILSVRC2012_val_00042824.JPEG 4
ILSVRC2012_val_00042832.JPEG 2
ILSVRC2012_val_00042839.JPEG 5
ILSVRC2012_val_00042841.JPEG 8
ILSVRC2012_val_00042859.JPEG 4
ILSVRC2012_val_00042888.JPEG 0
ILSVRC2012_val_00042894.JPEG 3
ILSVRC2012_val_00042896.JPEG 6
ILSVRC2012_val_00042897.JPEG 8
ILSVRC2012_val_00042904.JPEG 8
ILSVRC2012_val_00042915.JPEG 6
ILSVRC2012_val_00042933.JPEG 5
ILSVRC2012_val_00042946.JPEG 5
ILSVRC2012_val_00042965.JPEG 8
ILSVRC2012_val_00042977.JPEG 0
ILSVRC2012_val_00042998.JPEG 4
ILSVRC2012_val_00043004.JPEG 6
ILSVRC2012_val_00043014.JPEG 1
ILSVRC2012_val_00043022.JPEG 8
ILSVRC2012_val_00043037.JPEG 5
ILSVRC2012_val_00043041.JPEG 4
ILSVRC2012_val_00043051.JPEG 1
ILSVRC2012_val_00043052.JPEG 7
ILSVRC2012_val_00043062.JPEG 4
ILSVRC2012_val_00043067.JPEG 5
ILSVRC2012_val_00043090.JPEG 1
ILSVRC2012_val_00043104.JPEG 8
ILSVRC2012_val_00043118.JPEG 3
ILSVRC2012_val_00043126.JPEG 5
ILSVRC2012_val_00043130.JPEG 4
ILSVRC2012_val_00043134.JPEG 8
ILSVRC2012_val_00043136.JPEG 8
ILSVRC2012_val_00043138.JPEG 4
ILSVRC2012_val_00043141.JPEG 0
ILSVRC2012_val_00043145.JPEG 1
ILSVRC2012_val_00043158.JPEG 4
ILSVRC2012_val_00043173.JPEG 4
ILSVRC2012_val_00043180.JPEG 4
ILSVRC2012_val_00043191.JPEG 2
ILSVRC2012_val_00043195.JPEG 4
ILSVRC2012_val_00043238.JPEG 6
ILSVRC2012_val_00043241.JPEG 4
ILSVRC2012_val_00043247.JPEG 3
ILSVRC2012_val_00043250.JPEG 8
ILSVRC2012_val_00043258.JPEG 4
ILSVRC2012_val_00043266.JPEG 8
ILSVRC2012_val_00043294.JPEG 8
ILSVRC2012_val_00043303.JPEG 2
ILSVRC2012_val_00043312.JPEG 2
ILSVRC2012_val_00043331.JPEG 5
ILSVRC2012_val_00043369.JPEG 2
ILSVRC2012_val_00043395.JPEG 4
ILSVRC2012_val_00043399.JPEG 0
ILSVRC2012_val_00043404.JPEG 0
ILSVRC2012_val_00043410.JPEG 8
ILSVRC2012_val_00043415.JPEG 4
ILSVRC2012_val_00043424.JPEG 8
ILSVRC2012_val_00043444.JPEG 3
ILSVRC2012_val_00043462.JPEG 4
ILSVRC2012_val_00043465.JPEG 4
ILSVRC2012_val_00043467.JPEG 5
ILSVRC2012_val_00043480.JPEG 3
ILSVRC2012_val_00043483.JPEG 4
ILSVRC2012_val_00043484.JPEG 4
ILSVRC2012_val_00043504.JPEG 3
ILSVRC2012_val_00043509.JPEG 4
ILSVRC2012_val_00043510.JPEG 5
ILSVRC2012_val_00043524.JPEG 2
ILSVRC2012_val_00043546.JPEG 1
ILSVRC2012_val_00043576.JPEG 5
ILSVRC2012_val_00043582.JPEG 6
ILSVRC2012_val_00043598.JPEG 0
ILSVRC2012_val_00043616.JPEG 8
ILSVRC2012_val_00043632.JPEG 1
ILSVRC2012_val_00043633.JPEG 4
ILSVRC2012_val_00043635.JPEG 4
ILSVRC2012_val_00043649.JPEG 4
ILSVRC2012_val_00043655.JPEG 8
ILSVRC2012_val_00043670.JPEG 8
ILSVRC2012_val_00043677.JPEG 6
ILSVRC2012_val_00043687.JPEG 5
ILSVRC2012_val_00043692.JPEG 3
ILSVRC2012_val_00043695.JPEG 5
ILSVRC2012_val_00043701.JPEG 5
ILSVRC2012_val_00043705.JPEG 8
ILSVRC2012_val_00043711.JPEG 8
ILSVRC2012_val_00043722.JPEG 6
ILSVRC2012_val_00043766.JPEG 5
ILSVRC2012_val_00043768.JPEG 8
ILSVRC2012_val_00043777.JPEG 6
ILSVRC2012_val_00043794.JPEG 4
ILSVRC2012_val_00043797.JPEG 3
ILSVRC2012_val_00043803.JPEG 0
ILSVRC2012_val_00043808.JPEG 4
ILSVRC2012_val_00043822.JPEG 5
ILSVRC2012_val_00043823.JPEG 4
ILSVRC2012_val_00043837.JPEG 0
ILSVRC2012_val_00043854.JPEG 8
ILSVRC2012_val_00043860.JPEG 2
ILSVRC2012_val_00043867.JPEG 8
ILSVRC2012_val_00043891.JPEG 1
ILSVRC2012_val_00043898.JPEG 1
ILSVRC2012_val_00043899.JPEG 4
ILSVRC2012_val_00043906.JPEG 5
ILSVRC2012_val_00043927.JPEG 4
ILSVRC2012_val_00043945.JPEG 5
ILSVRC2012_val_00043951.JPEG 2
ILSVRC2012_val_00043968.JPEG 4
ILSVRC2012_val_00043975.JPEG 4
ILSVRC2012_val_00043990.JPEG 4
ILSVRC2012_val_00044010.JPEG 8
ILSVRC2012_val_00044011.JPEG 4
ILSVRC2012_val_00044027.JPEG 1
ILSVRC2012_val_00044059.JPEG 0
ILSVRC2012_val_00044076.JPEG 5
ILSVRC2012_val_00044077.JPEG 4
ILSVRC2012_val_00044082.JPEG 4
ILSVRC2012_val_00044092.JPEG 7
ILSVRC2012_val_00044097.JPEG 1
ILSVRC2012_val_00044102.JPEG 6
ILSVRC2012_val_00044108.JPEG 4
ILSVRC2012_val_00044111.JPEG 6
ILSVRC2012_val_00044135.JPEG 0
ILSVRC2012_val_00044145.JPEG 5
ILSVRC2012_val_00044153.JPEG 8
ILSVRC2012_val_00044158.JPEG 8
ILSVRC2012_val_00044187.JPEG 0
ILSVRC2012_val_00044209.JPEG 4
ILSVRC2012_val_00044216.JPEG 4
ILSVRC2012_val_00044217.JPEG 0
ILSVRC2012_val_00044228.JPEG 8
ILSVRC2012_val_00044238.JPEG 4
ILSVRC2012_val_00044249.JPEG 0
ILSVRC2012_val_00044262.JPEG 2
ILSVRC2012_val_00044268.JPEG 4
ILSVRC2012_val_00044270.JPEG 5
ILSVRC2012_val_00044288.JPEG 2
ILSVRC2012_val_00044296.JPEG 8
ILSVRC2012_val_00044301.JPEG 4
ILSVRC2012_val_00044305.JPEG 5
ILSVRC2012_val_00044307.JPEG 5
ILSVRC2012_val_00044313.JPEG 6
ILSVRC2012_val_00044314.JPEG 8
ILSVRC2012_val_00044317.JPEG 4
ILSVRC2012_val_00044330.JPEG 4
ILSVRC2012_val_00044341.JPEG 3
ILSVRC2012_val_00044357.JPEG 0
ILSVRC2012_val_00044361.JPEG 8
ILSVRC2012_val_00044363.JPEG 4
ILSVRC2012_val_00044374.JPEG 1
ILSVRC2012_val_00044390.JPEG 8
ILSVRC2012_val_00044393.JPEG 4
ILSVRC2012_val_00044395.JPEG 6
ILSVRC2012_val_00044404.JPEG 8
ILSVRC2012_val_00044407.JPEG 8
ILSVRC2012_val_00044422.JPEG 4
ILSVRC2012_val_00044440.JPEG 4
ILSVRC2012_val_00044461.JPEG 0
ILSVRC2012_val_00044476.JPEG 8
ILSVRC2012_val_00044490.JPEG 8
ILSVRC2012_val_00044491.JPEG 8
ILSVRC2012_val_00044505.JPEG 4
ILSVRC2012_val_00044514.JPEG 8
ILSVRC2012_val_00044515.JPEG 4
ILSVRC2012_val_00044532.JPEG 0
ILSVRC2012_val_00044563.JPEG 6
ILSVRC2012_val_00044574.JPEG 8
ILSVRC2012_val_00044578.JPEG 8
ILSVRC2012_val_00044585.JPEG 0
ILSVRC2012_val_00044586.JPEG 5
ILSVRC2012_val_00044591.JPEG 4
ILSVRC2012_val_00044603.JPEG 8
ILSVRC2012_val_00044619.JPEG 8
ILSVRC2012_val_00044632.JPEG 7
ILSVRC2012_val_00044660.JPEG 6
ILSVRC2012_val_00044672.JPEG 0
ILSVRC2012_val_00044677.JPEG 4
ILSVRC2012_val_00044704.JPEG 5
ILSVRC2012_val_00044755.JPEG 3
ILSVRC2012_val_00044756.JPEG 6
ILSVRC2012_val_00044760.JPEG 8
ILSVRC2012_val_00044761.JPEG 4
ILSVRC2012_val_00044767.JPEG 0
ILSVRC2012_val_00044781.JPEG 5
ILSVRC2012_val_00044814.JPEG 7
ILSVRC2012_val_00044819.JPEG 0
ILSVRC2012_val_00044824.JPEG 8
ILSVRC2012_val_00044827.JPEG 5
ILSVRC2012_val_00044836.JPEG 7
ILSVRC2012_val_00044855.JPEG 2
ILSVRC2012_val_00044882.JPEG 0
ILSVRC2012_val_00044884.JPEG 4
ILSVRC2012_val_00044891.JPEG 4
ILSVRC2012_val_00044892.JPEG 8
ILSVRC2012_val_00044903.JPEG 4
ILSVRC2012_val_00044914.JPEG 5
ILSVRC2012_val_00044916.JPEG 4
ILSVRC2012_val_00044933.JPEG 4
ILSVRC2012_val_00044946.JPEG 6
ILSVRC2012_val_00044959.JPEG 6
ILSVRC2012_val_00044966.JPEG 4
ILSVRC2012_val_00044971.JPEG 0
ILSVRC2012_val_00044990.JPEG 8
ILSVRC2012_val_00044993.JPEG 2
ILSVRC2012_val_00045007.JPEG 4
ILSVRC2012_val_00045009.JPEG 8
ILSVRC2012_val_00045011.JPEG 0
ILSVRC2012_val_00045037.JPEG 5
ILSVRC2012_val_00045043.JPEG 4
ILSVRC2012_val_00045051.JPEG 4
ILSVRC2012_val_00045058.JPEG 5
ILSVRC2012_val_00045059.JPEG 0
ILSVRC2012_val_00045091.JPEG 0
ILSVRC2012_val_00045094.JPEG 0
ILSVRC2012_val_00045123.JPEG 5
ILSVRC2012_val_00045125.JPEG 4
ILSVRC2012_val_00045132.JPEG 6
ILSVRC2012_val_00045156.JPEG 5
ILSVRC2012_val_00045161.JPEG 6
ILSVRC2012_val_00045164.JPEG 5
ILSVRC2012_val_00045200.JPEG 4
ILSVRC2012_val_00045227.JPEG 8
ILSVRC2012_val_00045230.JPEG 5
ILSVRC2012_val_00045234.JPEG 4
ILSVRC2012_val_00045239.JPEG 1
ILSVRC2012_val_00045249.JPEG 0
ILSVRC2012_val_00045263.JPEG 4
ILSVRC2012_val_00045278.JPEG 6
ILSVRC2012_val_00045281.JPEG 4
ILSVRC2012_val_00045291.JPEG 0
ILSVRC2012_val_00045304.JPEG 5
ILSVRC2012_val_00045321.JPEG 5
ILSVRC2012_val_00045347.JPEG 1
ILSVRC2012_val_00045354.JPEG 4
ILSVRC2012_val_00045363.JPEG 0
ILSVRC2012_val_00045387.JPEG 5
ILSVRC2012_val_00045392.JPEG 4
ILSVRC2012_val_00045393.JPEG 4
ILSVRC2012_val_00045405.JPEG 6
ILSVRC2012_val_00045408.JPEG 4
ILSVRC2012_val_00045413.JPEG 5
ILSVRC2012_val_00045420.JPEG 1
ILSVRC2012_val_00045431.JPEG 5
ILSVRC2012_val_00045438.JPEG 8
ILSVRC2012_val_00045442.JPEG 8
ILSVRC2012_val_00045444.JPEG 5
ILSVRC2012_val_00045489.JPEG 8
ILSVRC2012_val_00045503.JPEG 4
ILSVRC2012_val_00045505.JPEG 4
ILSVRC2012_val_00045513.JPEG 8
ILSVRC2012_val_00045514.JPEG 0
ILSVRC2012_val_00045520.JPEG 4
ILSVRC2012_val_00045521.JPEG 0
ILSVRC2012_val_00045525.JPEG 8
ILSVRC2012_val_00045542.JPEG 8
ILSVRC2012_val_00045549.JPEG 8
ILSVRC2012_val_00045569.JPEG 8
ILSVRC2012_val_00045571.JPEG 4
ILSVRC2012_val_00045585.JPEG 6
ILSVRC2012_val_00045600.JPEG 5
ILSVRC2012_val_00045624.JPEG 6
ILSVRC2012_val_00045626.JPEG 5
ILSVRC2012_val_00045643.JPEG 4
ILSVRC2012_val_00045647.JPEG 5
ILSVRC2012_val_00045650.JPEG 6
ILSVRC2012_val_00045652.JPEG 6
ILSVRC2012_val_00045673.JPEG 8
ILSVRC2012_val_00045683.JPEG 0
ILSVRC2012_val_00045692.JPEG 4
ILSVRC2012_val_00045703.JPEG 8
ILSVRC2012_val_00045711.JPEG 0
ILSVRC2012_val_00045713.JPEG 4
ILSVRC2012_val_00045724.JPEG 8
ILSVRC2012_val_00045726.JPEG 3
ILSVRC2012_val_00045728.JPEG 4
ILSVRC2012_val_00045741.JPEG 0
ILSVRC2012_val_00045743.JPEG 4
ILSVRC2012_val_00045770.JPEG 8
ILSVRC2012_val_00045775.JPEG 8
ILSVRC2012_val_00045795.JPEG 6
ILSVRC2012_val_00045811.JPEG 6
ILSVRC2012_val_00045825.JPEG 6
ILSVRC2012_val_00045826.JPEG 5
ILSVRC2012_val_00045829.JPEG 1
ILSVRC2012_val_00045836.JPEG 4
ILSVRC2012_val_00045837.JPEG 4
ILSVRC2012_val_00045848.JPEG 8
ILSVRC2012_val_00045857.JPEG 4
ILSVRC2012_val_00045871.JPEG 6
ILSVRC2012_val_00045879.JPEG 5
ILSVRC2012_val_00045893.JPEG 5
ILSVRC2012_val_00045896.JPEG 6
ILSVRC2012_val_00045900.JPEG 8
ILSVRC2012_val_00045910.JPEG 8
ILSVRC2012_val_00045913.JPEG 4
ILSVRC2012_val_00045921.JPEG 5
ILSVRC2012_val_00045946.JPEG 0
ILSVRC2012_val_00045958.JPEG 1
ILSVRC2012_val_00045985.JPEG 8
ILSVRC2012_val_00045987.JPEG 0
ILSVRC2012_val_00045991.JPEG 5
ILSVRC2012_val_00046004.JPEG 4
ILSVRC2012_val_00046040.JPEG 4
ILSVRC2012_val_00046041.JPEG 4
ILSVRC2012_val_00046043.JPEG 0
ILSVRC2012_val_00046053.JPEG 3
ILSVRC2012_val_00046054.JPEG 8
ILSVRC2012_val_00046069.JPEG 3
ILSVRC2012_val_00046083.JPEG 8
ILSVRC2012_val_00046089.JPEG 4
ILSVRC2012_val_00046095.JPEG 3
ILSVRC2012_val_00046105.JPEG 3
ILSVRC2012_val_00046117.JPEG 5
ILSVRC2012_val_00046122.JPEG 3
ILSVRC2012_val_00046137.JPEG 5
ILSVRC2012_val_00046141.JPEG 4
ILSVRC2012_val_00046144.JPEG 0
ILSVRC2012_val_00046148.JPEG 5
ILSVRC2012_val_00046149.JPEG 3
ILSVRC2012_val_00046153.JPEG 5
ILSVRC2012_val_00046231.JPEG 8
ILSVRC2012_val_00046233.JPEG 6
ILSVRC2012_val_00046237.JPEG 6
ILSVRC2012_val_00046239.JPEG 4
ILSVRC2012_val_00046251.JPEG 4
ILSVRC2012_val_00046267.JPEG 8
ILSVRC2012_val_00046285.JPEG 4
ILSVRC2012_val_00046291.JPEG 5
ILSVRC2012_val_00046307.JPEG 4
ILSVRC2012_val_00046314.JPEG 8
ILSVRC2012_val_00046316.JPEG 4
ILSVRC2012_val_00046330.JPEG 6
ILSVRC2012_val_00046356.JPEG 4
ILSVRC2012_val_00046380.JPEG 4
ILSVRC2012_val_00046410.JPEG 4
ILSVRC2012_val_00046417.JPEG 8
ILSVRC2012_val_00046423.JPEG 0
ILSVRC2012_val_00046425.JPEG 8
ILSVRC2012_val_00046427.JPEG 2
ILSVRC2012_val_00046438.JPEG 4
ILSVRC2012_val_00046443.JPEG 0
ILSVRC2012_val_00046455.JPEG 6
ILSVRC2012_val_00046456.JPEG 5
ILSVRC2012_val_00046457.JPEG 1
ILSVRC2012_val_00046485.JPEG 8
ILSVRC2012_val_00046486.JPEG 5
ILSVRC2012_val_00046491.JPEG 6
ILSVRC2012_val_00046494.JPEG 5
ILSVRC2012_val_00046508.JPEG 4
ILSVRC2012_val_00046522.JPEG 6
ILSVRC2012_val_00046527.JPEG 5
ILSVRC2012_val_00046534.JPEG 4
ILSVRC2012_val_00046558.JPEG 6
ILSVRC2012_val_00046565.JPEG 5
ILSVRC2012_val_00046568.JPEG 5
ILSVRC2012_val_00046571.JPEG 5
ILSVRC2012_val_00046572.JPEG 1
ILSVRC2012_val_00046574.JPEG 4
ILSVRC2012_val_00046584.JPEG 5
ILSVRC2012_val_00046590.JPEG 5
ILSVRC2012_val_00046609.JPEG 4
ILSVRC2012_val_00046611.JPEG 7
ILSVRC2012_val_00046617.JPEG 5
ILSVRC2012_val_00046621.JPEG 4
ILSVRC2012_val_00046626.JPEG 6
ILSVRC2012_val_00046645.JPEG 5
ILSVRC2012_val_00046666.JPEG 5
ILSVRC2012_val_00046670.JPEG 0
ILSVRC2012_val_00046674.JPEG 5
ILSVRC2012_val_00046689.JPEG 8
ILSVRC2012_val_00046701.JPEG 0
ILSVRC2012_val_00046703.JPEG 5
ILSVRC2012_val_00046710.JPEG 4
ILSVRC2012_val_00046716.JPEG 8
ILSVRC2012_val_00046736.JPEG 5
ILSVRC2012_val_00046741.JPEG 5
ILSVRC2012_val_00046755.JPEG 4
ILSVRC2012_val_00046770.JPEG 1
ILSVRC2012_val_00046782.JPEG 8
ILSVRC2012_val_00046783.JPEG 5
ILSVRC2012_val_00046784.JPEG 8
ILSVRC2012_val_00046801.JPEG 8
ILSVRC2012_val_00046802.JPEG 4
ILSVRC2012_val_00046803.JPEG 3
ILSVRC2012_val_00046846.JPEG 5
ILSVRC2012_val_00046856.JPEG 8
ILSVRC2012_val_00046873.JPEG 5
ILSVRC2012_val_00046903.JPEG 4
ILSVRC2012_val_00046933.JPEG 4
ILSVRC2012_val_00046942.JPEG 5
ILSVRC2012_val_00046943.JPEG 6
ILSVRC2012_val_00046958.JPEG 4
ILSVRC2012_val_00046964.JPEG 1
ILSVRC2012_val_00046978.JPEG 4
ILSVRC2012_val_00046981.JPEG 0
ILSVRC2012_val_00047009.JPEG 4
ILSVRC2012_val_00047025.JPEG 4
ILSVRC2012_val_00047043.JPEG 8
ILSVRC2012_val_00047065.JPEG 8
ILSVRC2012_val_00047073.JPEG 4
ILSVRC2012_val_00047075.JPEG 8
ILSVRC2012_val_00047085.JPEG 5
ILSVRC2012_val_00047094.JPEG 4
ILSVRC2012_val_00047103.JPEG 1
ILSVRC2012_val_00047105.JPEG 3
ILSVRC2012_val_00047106.JPEG 4
ILSVRC2012_val_00047108.JPEG 4
ILSVRC2012_val_00047114.JPEG 0
ILSVRC2012_val_00047115.JPEG 8
ILSVRC2012_val_00047126.JPEG 5
ILSVRC2012_val_00047151.JPEG 5
ILSVRC2012_val_00047152.JPEG 0
ILSVRC2012_val_00047154.JPEG 5
ILSVRC2012_val_00047169.JPEG 8
ILSVRC2012_val_00047174.JPEG 6
ILSVRC2012_val_00047185.JPEG 5
ILSVRC2012_val_00047222.JPEG 5
ILSVRC2012_val_00047229.JPEG 4
ILSVRC2012_val_00047230.JPEG 4
ILSVRC2012_val_00047252.JPEG 4
ILSVRC2012_val_00047258.JPEG 4
ILSVRC2012_val_00047260.JPEG 8
ILSVRC2012_val_00047261.JPEG 6
ILSVRC2012_val_00047270.JPEG 6
ILSVRC2012_val_00047281.JPEG 5
ILSVRC2012_val_00047288.JPEG 6
ILSVRC2012_val_00047289.JPEG 0
ILSVRC2012_val_00047295.JPEG 0
ILSVRC2012_val_00047317.JPEG 4
ILSVRC2012_val_00047337.JPEG 8
ILSVRC2012_val_00047352.JPEG 8
ILSVRC2012_val_00047361.JPEG 0
ILSVRC2012_val_00047365.JPEG 5
ILSVRC2012_val_00047370.JPEG 7
ILSVRC2012_val_00047372.JPEG 5
ILSVRC2012_val_00047375.JPEG 5
ILSVRC2012_val_00047378.JPEG 5
ILSVRC2012_val_00047379.JPEG 4
ILSVRC2012_val_00047392.JPEG 8
ILSVRC2012_val_00047394.JPEG 6
ILSVRC2012_val_00047397.JPEG 4
ILSVRC2012_val_00047404.JPEG 4
ILSVRC2012_val_00047416.JPEG 7
ILSVRC2012_val_00047425.JPEG 3
ILSVRC2012_val_00047433.JPEG 8
ILSVRC2012_val_00047455.JPEG 1
ILSVRC2012_val_00047472.JPEG 4
ILSVRC2012_val_00047476.JPEG 7
ILSVRC2012_val_00047491.JPEG 4
ILSVRC2012_val_00047497.JPEG 4
ILSVRC2012_val_00047498.JPEG 2
ILSVRC2012_val_00047520.JPEG 5
ILSVRC2012_val_00047525.JPEG 5
ILSVRC2012_val_00047532.JPEG 7
ILSVRC2012_val_00047533.JPEG 8
ILSVRC2012_val_00047541.JPEG 8
ILSVRC2012_val_00047545.JPEG 6
ILSVRC2012_val_00047546.JPEG 3
ILSVRC2012_val_00047547.JPEG 4
ILSVRC2012_val_00047552.JPEG 8
ILSVRC2012_val_00047587.JPEG 4
ILSVRC2012_val_00047601.JPEG 8
ILSVRC2012_val_00047603.JPEG 5
ILSVRC2012_val_00047623.JPEG 2
ILSVRC2012_val_00047630.JPEG 8
ILSVRC2012_val_00047641.JPEG 5
ILSVRC2012_val_00047643.JPEG 8
ILSVRC2012_val_00047657.JPEG 5
ILSVRC2012_val_00047682.JPEG 6
ILSVRC2012_val_00047696.JPEG 4
ILSVRC2012_val_00047704.JPEG 8
ILSVRC2012_val_00047711.JPEG 0
ILSVRC2012_val_00047716.JPEG 2
ILSVRC2012_val_00047717.JPEG 8
ILSVRC2012_val_00047740.JPEG 5
ILSVRC2012_val_00047746.JPEG 3
ILSVRC2012_val_00047755.JPEG 0
ILSVRC2012_val_00047788.JPEG 5
ILSVRC2012_val_00047795.JPEG 5
ILSVRC2012_val_00047820.JPEG 8
ILSVRC2012_val_00047832.JPEG 3
ILSVRC2012_val_00047833.JPEG 4
ILSVRC2012_val_00047853.JPEG 5
ILSVRC2012_val_00047863.JPEG 8
ILSVRC2012_val_00047870.JPEG 8
ILSVRC2012_val_00047877.JPEG 8
ILSVRC2012_val_00047880.JPEG 7
ILSVRC2012_val_00047891.JPEG 7
ILSVRC2012_val_00047892.JPEG 6
ILSVRC2012_val_00047901.JPEG 8
ILSVRC2012_val_00047911.JPEG 1
ILSVRC2012_val_00047913.JPEG 0
ILSVRC2012_val_00047919.JPEG 0
ILSVRC2012_val_00047924.JPEG 0
ILSVRC2012_val_00047925.JPEG 1
ILSVRC2012_val_00047928.JPEG 8
ILSVRC2012_val_00047939.JPEG 8
ILSVRC2012_val_00047941.JPEG 3
ILSVRC2012_val_00047943.JPEG 4
ILSVRC2012_val_00047952.JPEG 8
ILSVRC2012_val_00047956.JPEG 5
ILSVRC2012_val_00047969.JPEG 4
ILSVRC2012_val_00047999.JPEG 6
ILSVRC2012_val_00048011.JPEG 3
ILSVRC2012_val_00048026.JPEG 8
ILSVRC2012_val_00048027.JPEG 4
ILSVRC2012_val_00048035.JPEG 5
ILSVRC2012_val_00048039.JPEG 4
ILSVRC2012_val_00048052.JPEG 7
ILSVRC2012_val_00048058.JPEG 8
ILSVRC2012_val_00048072.JPEG 8
ILSVRC2012_val_00048076.JPEG 8
ILSVRC2012_val_00048079.JPEG 8
ILSVRC2012_val_00048091.JPEG 8
ILSVRC2012_val_00048099.JPEG 5
ILSVRC2012_val_00048106.JPEG 7
ILSVRC2012_val_00048140.JPEG 5
ILSVRC2012_val_00048142.JPEG 4
ILSVRC2012_val_00048155.JPEG 4
ILSVRC2012_val_00048160.JPEG 1
ILSVRC2012_val_00048203.JPEG 4
ILSVRC2012_val_00048221.JPEG 3
ILSVRC2012_val_00048224.JPEG 8
ILSVRC2012_val_00048229.JPEG 4
ILSVRC2012_val_00048234.JPEG 4
ILSVRC2012_val_00048235.JPEG 0
ILSVRC2012_val_00048238.JPEG 0
ILSVRC2012_val_00048247.JPEG 3
ILSVRC2012_val_00048252.JPEG 4
ILSVRC2012_val_00048257.JPEG 3
ILSVRC2012_val_00048265.JPEG 4
ILSVRC2012_val_00048291.JPEG 5
ILSVRC2012_val_00048294.JPEG 5
ILSVRC2012_val_00048326.JPEG 8
ILSVRC2012_val_00048347.JPEG 4
ILSVRC2012_val_00048351.JPEG 7
ILSVRC2012_val_00048379.JPEG 0
ILSVRC2012_val_00048388.JPEG 5
ILSVRC2012_val_00048396.JPEG 0
ILSVRC2012_val_00048401.JPEG 8
ILSVRC2012_val_00048414.JPEG 8
ILSVRC2012_val_00048423.JPEG 8
ILSVRC2012_val_00048433.JPEG 6
ILSVRC2012_val_00048439.JPEG 0
ILSVRC2012_val_00048475.JPEG 5
ILSVRC2012_val_00048477.JPEG 8
ILSVRC2012_val_00048480.JPEG 3
ILSVRC2012_val_00048482.JPEG 2
ILSVRC2012_val_00048491.JPEG 5
ILSVRC2012_val_00048549.JPEG 4
ILSVRC2012_val_00048562.JPEG 7
ILSVRC2012_val_00048570.JPEG 8
ILSVRC2012_val_00048601.JPEG 4
ILSVRC2012_val_00048608.JPEG 5
ILSVRC2012_val_00048613.JPEG 0
ILSVRC2012_val_00048629.JPEG 0
ILSVRC2012_val_00048662.JPEG 5
ILSVRC2012_val_00048676.JPEG 8
ILSVRC2012_val_00048687.JPEG 8
ILSVRC2012_val_00048688.JPEG 5
ILSVRC2012_val_00048700.JPEG 4
ILSVRC2012_val_00048719.JPEG 6
ILSVRC2012_val_00048722.JPEG 4
ILSVRC2012_val_00048741.JPEG 5
ILSVRC2012_val_00048743.JPEG 8
ILSVRC2012_val_00048749.JPEG 4
ILSVRC2012_val_00048764.JPEG 6
ILSVRC2012_val_00048766.JPEG 8
ILSVRC2012_val_00048817.JPEG 5
ILSVRC2012_val_00048824.JPEG 4
ILSVRC2012_val_00048825.JPEG 4
ILSVRC2012_val_00048832.JPEG 6
ILSVRC2012_val_00048838.JPEG 4
ILSVRC2012_val_00048846.JPEG 4
ILSVRC2012_val_00048855.JPEG 5
ILSVRC2012_val_00048894.JPEG 8
ILSVRC2012_val_00048895.JPEG 8
ILSVRC2012_val_00048897.JPEG 5
ILSVRC2012_val_00048907.JPEG 4
ILSVRC2012_val_00048920.JPEG 6
ILSVRC2012_val_00048932.JPEG 5
ILSVRC2012_val_00048939.JPEG 5
ILSVRC2012_val_00048950.JPEG 6
ILSVRC2012_val_00048954.JPEG 5
ILSVRC2012_val_00048991.JPEG 3
ILSVRC2012_val_00048995.JPEG 2
ILSVRC2012_val_00049019.JPEG 5
ILSVRC2012_val_00049042.JPEG 8
ILSVRC2012_val_00049044.JPEG 0
ILSVRC2012_val_00049056.JPEG 4
ILSVRC2012_val_00049085.JPEG 8
ILSVRC2012_val_00049093.JPEG 4
ILSVRC2012_val_00049111.JPEG 5
ILSVRC2012_val_00049119.JPEG 2
ILSVRC2012_val_00049124.JPEG 5
ILSVRC2012_val_00049129.JPEG 0
ILSVRC2012_val_00049152.JPEG 8
ILSVRC2012_val_00049161.JPEG 5
ILSVRC2012_val_00049168.JPEG 8
ILSVRC2012_val_00049190.JPEG 0
ILSVRC2012_val_00049194.JPEG 5
ILSVRC2012_val_00049201.JPEG 8
ILSVRC2012_val_00049203.JPEG 4
ILSVRC2012_val_00049216.JPEG 6
ILSVRC2012_val_00049235.JPEG 4
ILSVRC2012_val_00049259.JPEG 8
ILSVRC2012_val_00049260.JPEG 3
ILSVRC2012_val_00049265.JPEG 4
ILSVRC2012_val_00049279.JPEG 1
ILSVRC2012_val_00049287.JPEG 2
ILSVRC2012_val_00049313.JPEG 4
ILSVRC2012_val_00049316.JPEG 2
ILSVRC2012_val_00049323.JPEG 5
ILSVRC2012_val_00049352.JPEG 4
ILSVRC2012_val_00049353.JPEG 4
ILSVRC2012_val_00049377.JPEG 5
ILSVRC2012_val_00049384.JPEG 8
ILSVRC2012_val_00049399.JPEG 6
ILSVRC2012_val_00049404.JPEG 5
ILSVRC2012_val_00049416.JPEG 4
ILSVRC2012_val_00049440.JPEG 7
ILSVRC2012_val_00049443.JPEG 6
ILSVRC2012_val_00049462.JPEG 5
ILSVRC2012_val_00049553.JPEG 4
ILSVRC2012_val_00049558.JPEG 0
ILSVRC2012_val_00049560.JPEG 6
ILSVRC2012_val_00049577.JPEG 6
ILSVRC2012_val_00049578.JPEG 8
ILSVRC2012_val_00049584.JPEG 4
ILSVRC2012_val_00049595.JPEG 4
ILSVRC2012_val_00049598.JPEG 7
ILSVRC2012_val_00049603.JPEG 5
ILSVRC2012_val_00049611.JPEG 8
ILSVRC2012_val_00049624.JPEG 8
ILSVRC2012_val_00049637.JPEG 2
ILSVRC2012_val_00049638.JPEG 8
ILSVRC2012_val_00049646.JPEG 3
ILSVRC2012_val_00049654.JPEG 0
ILSVRC2012_val_00049665.JPEG 4
ILSVRC2012_val_00049682.JPEG 4
ILSVRC2012_val_00049696.JPEG 6
ILSVRC2012_val_00049703.JPEG 3
ILSVRC2012_val_00049722.JPEG 8
ILSVRC2012_val_00049727.JPEG 6
ILSVRC2012_val_00049735.JPEG 1
ILSVRC2012_val_00049738.JPEG 6
ILSVRC2012_val_00049740.JPEG 6
ILSVRC2012_val_00049773.JPEG 3
ILSVRC2012_val_00049782.JPEG 3
ILSVRC2012_val_00049805.JPEG 0
ILSVRC2012_val_00049811.JPEG 0
ILSVRC2012_val_00049841.JPEG 0
ILSVRC2012_val_00049845.JPEG 8
ILSVRC2012_val_00049884.JPEG 0
ILSVRC2012_val_00049902.JPEG 5
ILSVRC2012_val_00049908.JPEG 0
ILSVRC2012_val_00049936.JPEG 6
ILSVRC2012_val_00049937.JPEG 4
ILSVRC2012_val_00049962.JPEG 4
ILSVRC2012_val_00049966.JPEG 4
ILSVRC2012_val_00049974.JPEG 5
ILSVRC2012_val_00049981.JPEG 7
ILSVRC2012_val_00049985.JPEG 5
ILSVRC2012_val_00049988.JPEG 4
ILSVRC2012_val_00049991.JPEG 7
ILSVRC2012_val_00049996.JPEG 1
